# Supplementary material for: DNA methylation status of the SPHK1 and LTB genes underlies the clinicopathological diversity of non-alcoholic steatohepatitis-related hepatocellular carcinomas
Source: J Cancer Res Clin Oncol. 2022 Nov 8;149(8):5109–25. doi: 10.1007/s00432-022-04445-9 (PMC10349775; doi:10.1007/s00432-022-04445-9)
Supplement: Supplementary file 1 — Supplementary file1 (PDF 4790 KB) [file 432_2022_4445_MOESM1_ESM.pdf]

**Supplementary Table 1** Clinicopathological characteristics of the patients from whom tissue specimens were obtained.

| Clinicopathological parameters                          |                             | Number of samples or mean±standard deviation |                                                            |
|---------------------------------------------------------|-----------------------------|----------------------------------------------|------------------------------------------------------------|
|                                                         |                             | Control patients<br>(C, n=36)                | Hepatocellular carcinoma (HCC) patients<br>(N and T, n=26) |
| <b>Patients</b>                                         |                             |                                              |                                                            |
| Age                                                     |                             | 61.5±7.94                                    | 71.4±7.24                                                  |
| Sex                                                     | Male                        | 26                                           | 24                                                         |
|                                                         | Female                      | 10                                           | 2                                                          |
| <b>Pathological findings of N samples</b>               |                             |                                              |                                                            |
| Steatosis (%) <sup>a</sup>                              | Less than 5                 |                                              | 0                                                          |
|                                                         | 5 or more but less than 33  |                                              | 17                                                         |
|                                                         | 33 or more but less than 66 |                                              | 8                                                          |
|                                                         | 66 or more                  |                                              | 1                                                          |
| Lobular inflammation (foci/200 x field) <sup>a</sup>    | Less than 2                 |                                              | 21                                                         |
|                                                         | 2 or more but less than 4   |                                              | 5                                                          |
|                                                         | 4 or more                   |                                              | 0                                                          |
| Ballooning <sup>a</sup>                                 | None                        |                                              | 0                                                          |
|                                                         | Few                         |                                              | 23                                                         |
|                                                         | Many                        |                                              | 3                                                          |
| Fibrosis <sup>b</sup>                                   | 0                           |                                              | 0                                                          |
|                                                         | 1                           |                                              | 6                                                          |
|                                                         | 2                           |                                              | 10                                                         |
|                                                         | 3                           |                                              | 6                                                          |
|                                                         | 4                           |                                              | 4                                                          |
| Non-alcoholic steatohepatitis (NASH) stage <sup>t</sup> | 1                           |                                              | 20                                                         |
|                                                         | 2                           |                                              | 4                                                          |
|                                                         | 3                           |                                              | 2                                                          |
| <b>Pathological findings of HCCs</b>                    |                             |                                              |                                                            |
| Tumor size (largest diameter) (mm)                      | Less than 50                |                                              | 16                                                         |
|                                                         | 50 or more                  |                                              | 10                                                         |
| Differentiation <sup>c</sup>                            | Well                        |                                              | 4                                                          |
|                                                         | Moderate                    |                                              | 17                                                         |
|                                                         | Poor                        |                                              | 5                                                          |
| Tumor cell steatosis (%) <sup>d</sup>                   |                             |                                              | 11.7±16.1                                                  |
| Scirrhus component (%) <sup>d</sup>                     |                             |                                              | 13.1±30.2                                                  |
| Portal vein involvement                                 | Positive                    |                                              | 14                                                         |
|                                                         | Negative                    |                                              | 12                                                         |
| Bile duct involvement                                   | Positive                    |                                              | 1                                                          |
|                                                         | Negative                    |                                              | 25                                                         |
| Intrahepatic metastasis                                 | Positive                    |                                              | 0                                                          |
|                                                         | Negative                    |                                              | 26                                                         |
| Pathological stage <sup>e</sup>                         | T1a                         |                                              | 2                                                          |
|                                                         | T1b                         |                                              | 9                                                          |
|                                                         | T2                          |                                              | 13                                                         |
|                                                         | T3                          |                                              | 1                                                          |
|                                                         | T4                          |                                              | 1                                                          |

C, normal control liver tissue; N, non-cancerous liver tissue obtained by partial hepatectomy from HCC patients; T, corresponding cancerous tissue. <sup>a</sup>Microscopic features (steatosis, lobular inflammation, ballooning and fibrosis) were evaluated according to the non-alcoholic fatty liver disease (NAFLD) activity score (NAS) (Brunt et al. 2011). <sup>b</sup>NASH stage was defined according to the Brunt classification (Brunt et al. 2011). <sup>c</sup>Histological differentiation of HCCs was in accordance with the World Health Organization classification (Torbensohn et al. 2019). <sup>d</sup>Tumor cell steatosis and the scirrhus component were evaluated as described in the Methods section. <sup>e</sup>Pathological stage was defined according to the Union for International Cancer Control Tumor-Node-Metastasis classification (Brierley et al. 2017).

**Supplementary Table 2** List of primers used for the quantitative reverse transcription-PCR reaction.

| Gene         | Primer  | Sequence                      |
|--------------|---------|-------------------------------|
| <i>GAPDH</i> | Forward | 5`tgtgggcaaggtcatccct3`       |
|              | Reverse | 5`gccctccgacgcctgcttca3`      |
| <i>SPHK1</i> | Forward | 5`aggctgaaatctccttcacgc3`     |
|              | Reverse | 5`gtctccagacatgaccaccag3`     |
| <i>INHBA</i> | Forward | 5`gaacagccaggaagacgctgc3`     |
|              | Reverse | 5`accactgacaggctcactgccttc3`  |
| <i>LTB</i>   | Forward | 5`cacaggcccagcaaggactg3`      |
|              | Reverse | 5`gctgagatctgttctggctcctc3`   |
| <i>PDE3B</i> | Forward | 5`atgtaggcttcagaagagctggtg3`  |
|              | Reverse | 5`gggtgatcgattagtagagagccag3` |

**Supplementary Table 3** The 3,888 probes designed for the 1,890 genes showing significant differences in DNA methylation levels between Cluster I and Cluster II ( $P$  value <0.05 by Welch's t test and  $\Delta\beta_{\text{I-II}} > 0.1$  or <-0.1).

**a** The 1,795 probes showing DNA hypermethylation in Cluster I in comparison with Cluster II ( $\Delta\beta_{\text{I-II}} > 0.1$ ).

| ProbelD <sup>a</sup> | Chromosome | Position <sup>b</sup> | Gene symbol | Annotation <sup>c</sup> | CpG type <sup>d</sup> | DNA methylatio levels (β value) |                         |                    |                |                                                                 |        |
|----------------------|------------|-----------------------|-------------|-------------------------|-----------------------|---------------------------------|-------------------------|--------------------|----------------|-----------------------------------------------------------------|--------|
|                      |            |                       |             |                         |                       | Cluster I<br>(mean±SD)          | Cluster II<br>(mean±SD) | Δβ <sub>I-II</sub> | Welch's T-test | Inverse correlation with<br>mRNA expression levels <sup>e</sup> |        |
|                      |            |                       |             |                         |                       |                                 |                         |                    | P              | P                                                               | r      |
| cg17415355           | 11         | 1320010               | TOLLIP      | 5'UTR/1st intron        | S_Shelf               | 0.815±0.057                     | 0.372±0.212             | 0.443              | 6.24E-08       | 4.98E-10                                                        | -0.300 |
| cg24222440           | 11         | 118397413             | TTC36       | TSS1500                 | N_Shelf               | 0.814±0.054                     | 0.381±0.179             | 0.433              | 3.38E-09       | 1.27E-33                                                        | -0.548 |
| cg02376018           | 3          | 187453520             | BCL6        | 5'UTR/1st intron        | N_Shelf               | 0.809±0.096                     | 0.381±0.175             | 0.429              | 4.35E-08       | 6.80E-14                                                        | -0.358 |
| cg26245202           | 1          | 205602864             | ELK4        | TSS1500                 | S_Shore               | 0.802±0.053                     | 0.39±0.266              | 0.413              | 3.84E-06       | 1.84E-12                                                        | -0.338 |
| cg19028997           | 1          | 205603040             | ELK4        | TSS1500                 | S_Shore               | 0.808±0.047                     | 0.403±0.291             | 0.405              | 1.62E-05       | 3.38E-11                                                        | -0.319 |
| cg00807909           | 5          | 169659618             | C5orf58     | TSS1500                 | N_Shore               | 0.721±0.103                     | 0.324±0.149             | 0.397              | 1.91E-07       | 1.69E-06                                                        | -0.233 |
| cg16694837           | 14         | 99945655              | SETD3       | 5'UTR/1st intron        | N_Shore               | 0.61±0.12                       | 0.213±0.085             | 0.397              | 6.10E-06       | 1.90E-08                                                        | -0.273 |
| cg19931529           | 2          | 64072167              | UGP2        | 5'UTR/1st intron        | S_Shelf               | 0.719±0.125                     | 0.329±0.15              | 0.390              | 3.41E-06       | 2.72E-41                                                        | -0.598 |
| cg04657700           | 2          | 223535084             | MOGAT1      | TSS1500                 | N_Shore               | 0.696±0.089                     | 0.308±0.142             | 0.388              | 3.45E-08       | 9.88E-24                                                        | -0.467 |
| cg18520851           | 5          | 115149189             | CDO1        | 5'UTR/1st intron        | N_Shelf               | 0.69±0.13                       | 0.311±0.168             | 0.379              | 8.38E-06       | 3.78E-25                                                        | -0.480 |
| cg25611443           | 1          | 205603068             | ELK4        | TSS1500                 | S_Shore               | 0.791±0.059                     | 0.412±0.268             | 0.379              | 1.35E-05       | 1.82E-11                                                        | -0.323 |
| cg01808050           | 2          | 3521258               | ADI1        | 5'UTR/1st exon          | N_Shore               | 0.708±0.227                     | 0.33±0.152              | 0.378              | 1.61E-03       | 1.51E-48                                                        | -0.638 |
| cg05152432           | 1          | 1689887               | NADK        | 1st exon                | N_Shore               | 0.671±0.238                     | 0.297±0.104             | 0.373              | 2.63E-03       | 3.34E-12                                                        | -0.334 |
| cg01585794           | 8          | 27347372              | EPHX2       | TSS1500                 | N_Shore               | 0.608±0.116                     | 0.242±0.124             | 0.366              | 3.31E-06       | 7.57E-21                                                        | -0.439 |
| cg18760876           | 5          | 169659627             | C5orf58     | TSS1500                 | N_Shore               | 0.748±0.109                     | 0.381±0.19              | 0.366              | 2.99E-06       | 9.42E-07                                                        | -0.239 |
| cg16589271           | 11         | 82993272              | CCDC90B     | 5'UTR                   | N_Shelf               | 0.691±0.107                     | 0.327±0.094             | 0.364              | 2.54E-06       | 3.14E-05                                                        | -0.204 |
| cg19045070           | 11         | 118397595             | TTC36       | TSS1500                 | N_Shelf               | 0.662±0.175                     | 0.301±0.092             | 0.362              | 4.09E-04       | 1.41E-09                                                        | -0.293 |
| cg18422423           | 3          | 51576922              | RAD54L2     | 5'UTR                   | S_Shelf               | 0.67±0.184                      | 0.312±0.12              | 0.359              | 5.42E-04       | 2.30E-08                                                        | -0.271 |
| cg18811130           | 10         | 131268886             | MGMT        | 5'UTR/1st intron        | S_Shelf               | 0.47±0.137                      | 0.115±0.042             | 0.355              | 1.24E-04       | 2.50E-11                                                        | -0.321 |
| cg15781838           | 2          | 128422717             | LIMS2       | 5'UTR/1st intron        | S_Shore               | 0.592±0.159                     | 0.238±0.109             | 0.354              | 1.91E-04       | 1.08E-11                                                        | -0.327 |
| cg07111988           | 1          | 24971764              | SRRM1       | 5'UTR/1st intron        | S_Shore               | 0.612±0.18                      | 0.264±0.11              | 0.347              | 6.05E-04       | 6.68E-07                                                        | -0.242 |
| cg15095727           | 3          | 138311508             | CEP70       | 5'UTR/1st intron        | N_Shore               | 0.604±0.197                     | 0.257±0.096             | 0.347              | 1.25E-03       | 3.22E-08                                                        | -0.269 |
| cg21200986           | 7          | 75546790              | POR         | 5'UTR/1st intron        | S_Shelf               | 0.598±0.145                     | 0.255±0.095             | 0.343              | 1.25E-04       | 3.26E-33                                                        | -0.545 |
| cg03233464           | 5          | 139938009             | SRA1        | TSS1500                 | S_Shore               | 0.687±0.097                     | 0.345±0.101             | 0.342              | 1.02E-06       | 3.06E-07                                                        | -0.249 |
| cg07766743           | 8          | 27348001              | EPHX2       | TSS1500                 | N_Shore               | 0.634±0.13                      | 0.292±0.111             | 0.342              | 3.58E-05       | 8.53E-19                                                        | -0.417 |
| cg07521912           | 5          | 169660734             | C5orf58     | 5'UTR/1st intron        | S_Shore               | 0.667±0.118                     | 0.325±0.117             | 0.342              | 1.03E-05       | 6.35E-08                                                        | -0.263 |
| cg00768179           | 1          | 8083892               | ERRF1       | 5'UTR/1st intron        | N_Shore               | 0.616±0.176                     | 0.276±0.092             | 0.341              | 6.40E-04       | 6.02E-07                                                        | -0.243 |
| cg27527503           | 4          | 108909664             | HADH        | TSS1500                 | N_Shore               | 0.644±0.203                     | 0.305±0.114             | 0.339              | 1.62E-03       | 5.88E-17                                                        | -0.396 |
| cg02059055           | 6          | 18390303              | RNF144B     | 5'UTR/1st intron        | S_Shelf               | 0.571±0.109                     | 0.233±0.137             | 0.338              | 3.53E-06       | 1.77E-11                                                        | -0.323 |
| cg11903188           | 2          | 239195602             | PER2        | 5'UTR/1st intron        | N_Shore               | 0.592±0.138                     | 0.254±0.106             | 0.338              | 7.62E-05       | 1.18E-06                                                        | -0.237 |
| cg04676799           | 5          | 115152938             | CDO1        | TSS1500                 | S_Shore               | 0.63±0.132                      | 0.293±0.098             | 0.337              | 5.33E-05       | 1.42E-22                                                        | -0.456 |
| cg00938429           | 12         | 43946880              | ADAMTS20    | TSS1500                 | S_Shore               | 0.677±0.081                     | 0.34±0.15               | 0.337              | 1.67E-07       | 1.26E-05                                                        | -0.213 |
| cg18736775           | 8          | 18248649              | NAT2        | TSS200                  | S_Shelf               | 0.738±0.151                     | 0.402±0.155             | 0.337              | 1.37E-04       | 1.64E-21                                                        | -0.446 |
| cg26749361           | 16         | 30455027              | SEPHS2      | 1st exon/3'UTR          | N_Shore               | 0.626±0.189                     | 0.289±0.085             | 0.336              | 1.17E-03       | 4.83E-24                                                        | -0.470 |
| cg18554976           | 19         | 35629356              | FXD1        | TSS1500                 | N_Shelf               | 0.567±0.17                      | 0.232±0.109             | 0.335              | 4.95E-04       | 1.02E-21                                                        | -0.448 |
| cg07094847           | 7          | 27160586              | HOKA3       | 5'UTR                   | N_Shelf               | 0.558±0.101                     | 0.227±0.079             | 0.332              | 5.00E-06       | 1.33E-07                                                        | -0.256 |
| cg10550308           | 3          | 184969158             | EHHADH      | 5'UTR/1st intron        | N_Shelf               | 0.534±0.172                     | 0.203±0.074             | 0.332              | 7.27E-04       | 3.81E-21                                                        | -0.442 |
| cg13243168           | 17         | 61915833              | SMARCD2     | 5'UTR/1st intron        | N_Shelf               | 0.578±0.088                     | 0.247±0.097             | 0.331              | 3.71E-07       | 9.36E-12                                                        | -0.327 |
| cg27547703           | 10         | 115939024             | TDRD1       | TSS200                  | Island                | 0.775±0.119                     | 0.445±0.31              | 0.330              | 6.66E-04       | 7.76E-11                                                        | -0.313 |
| cg05385923           | 7          | 150495881             | TMEM176B    | 5'UTR/1st intron        | N_Shore               | 0.581±0.17                      | 0.251±0.092             | 0.330              | 6.24E-04       | 4.05E-25                                                        | -0.480 |
| cg10665490           | 2          | 86946078              | RMND5A      | TSS1500                 | N_Shore               | 0.728±0.089                     | 0.399±0.129             | 0.329              | 3.87E-07       | 4.17E-12                                                        | -0.333 |
| cg19831369           | 22         | 26881026              | HPS4        | TSS1500                 | S_Shore               | 0.678±0.189                     | 0.35±0.146              | 0.329              | 1.13E-03       | 1.23E-07                                                        | -0.257 |
| cg09824255           | 5          | 140014002             | CD14        | TSS1500                 | S_Shore               | 0.663±0.147                     | 0.335±0.136             | 0.328              | 1.39E-04       | 1.01E-17                                                        | -0.405 |
| cg26724545           | 5          | 169659950             | C5orf58     | 1st exon                | Island                | 0.65±0.106                      | 0.322±0.162             | 0.328              | 5.33E-06       | 1.66E-09                                                        | -0.291 |
| cg22624827           | 1          | 64058180              | PGM1        | TSS1500                 | N_Shore               | 0.626±0.158                     | 0.298±0.072             | 0.327              | 4.47E-04       | 1.43E-15                                                        | -0.380 |
| cg03498175           | 4          | 185724569             | ACSL1       | 5'UTR                   | Island                | 0.642±0.164                     | 0.315±0.093             | 0.327              | 5.05E-04       | 8.84E-11                                                        | -0.312 |
| cg10021288           | 2          | 128175891             | PROC        | TSS200                  | S_Shelf               | 0.578±0.167                     | 0.252±0.092             | 0.327              | 5.68E-04       | 2.36E-10                                                        | -0.306 |
| cg26204042           | 11         | 110163765             | RDX         | 5'UTR/1st intron        | N_Shelf               | 0.71±0.139                      | 0.384±0.169             | 0.326              | 8.80E-05       | 4.04E-09                                                        | -0.285 |
| cg27475365           | 6          | 125476259             | TPD52L1     | 5'UTR/1st intron        | S_Shore               | 0.534±0.227                     | 0.208±0.084             | 0.326              | 4.45E-03       | 1.10E-18                                                        | -0.416 |
| cg14019146           | 3          | 50243930              | SLC38A3     | 5'UTR/1st intron        | S_Shore               | 0.511±0.178                     | 0.186±0.066             | 0.325              | 1.06E-03       | 1.05E-49                                                        | -0.644 |
| cg16415646           | 7          | 41743001              | INHBA       | TSS1500                 | N_Shelf               | 0.723±0.102                     | 0.399±0.172             | 0.324              | 5.62E-06       | 5.56E-06                                                        | -0.222 |
| cg00574819           | 4          | 128981252             | LARP1B      | TSS1500                 | N_Shore               | 0.633±0.178                     | 0.309±0.087             | 0.324              | 9.89E-04       | 3.47E-07                                                        | -0.248 |
| cg03231596           | 8          | 12987546              | DLC1        | 5'UTR                   | N_Shelf               | 0.666±0.101                     | 0.342±0.153             | 0.324              | 3.25E-06       | 3.08E-12                                                        | -0.335 |
| cg09798023           | 7          | 27161624              | HOKA3       | 5'UTR                   | N_Shelf               | 0.655±0.054                     | 0.331±0.162             | 0.323              | 1.04E-07       | 1.52E-19                                                        | -0.425 |
| cg10089626           | 1          | 45969600              | MMACHC      | 5'UTR/1st intron        | S_Shelf               | 0.482±0.113                     | 0.161±0.081             | 0.322              | 2.14E-05       | 4.14E-14                                                        | -0.361 |
| cg06163411           | 7          | 129691519             | ZC3HC1      | TSS1500                 | S_Shore               | 0.715±0.174                     | 0.393±0.215             | 0.322              | 9.00E-04       | 2.23E-08                                                        | -0.271 |
| cg08823975           | 4          | 185724646             | ACSL1       | 5'UTR                   | Island                | 0.582±0.145                     | 0.26±0.085              | 0.322              | 2.30E-04       | 1.09E-14                                                        | -0.368 |
| cg09866303           | 6          | 7142638               | RREB1       | 5'UTR/1st intron        | S_Shore               | 0.64±0.129                      | 0.32±0.087              | 0.320              | 8.12E-05       | 2.83E-05                                                        | -0.205 |
| cg09514524           | 8          | 145729799             | GPT         | 1st exon                | N_Shelf               | 0.76±0.213                      | 0.441±0.125             | 0.319              | 3.20E-03       | 1.40E-16                                                        | -0.392 |
| cg01287342           | 8          | 63999202              | TPPA        | TSS1500                 | S_Shore               | 0.573±0.195                     | 0.255±0.126             | 0.318              | 1.88E-03       | 4.82E-14                                                        | -0.360 |
| cg00177290           | 1          | 110161285             | AMPD2       | TSS1500                 | N_Shore               | 0.593±0.149                     | 0.275±0.083             | 0.318              | 3.13E-04       | 3.97E-07                                                        | -0.247 |
| cg00842076           | 14         | 89881835              | FOXN3       | 5'UTR/1st intron        | N_Shore               | 0.631±0.118                     | 0.313±0.133             | 0.318              | 1.93E-05       | 2.23E-11                                                        | -0.322 |
| cg23340345           | 2          | 233501672             | EFHD1       | 5'UTR/1st intron        | S_Shore               | 0.552±0.097                     | 0.236±0.113             | 0.316              | 1.99E-06       | 3.53E-07                                                        | -0.248 |
| cg11498870           | 8          | 88886243              | DCAF4L2     | 5'UTR/1st exon          | Island                | 0.567±0.209                     | 0.251±0.113             | 0.316              | 3.08E-03       | 1.21E-17                                                        | -0.404 |
| cg24598094           | 1          | 211753582             | SLC30A1     | TSS1500                 | S_Shore               | 0.467±0.161                     | 0.151±0.079             | 0.316              | 5.99E-04       | 3.55E-05                                                        | -0.202 |
| cg00787429           | 5          | 169660328             | C5orf58     | 5'UTR/1st intron        | S_Shore               | 0.713±0.079                     | 0.398±0.102             | 0.315              | 1.24E-07       | 4.62E-10                                                        | -0.301 |
| cg11755245           | 3          | 184969918             | EHHADH      | 5'UTR/1st intron        | N_Shore               | 0.576±0.143                     | 0.261±0.087             | 0.315              | 2.26E-04       | 7.35E-20                                                        | -0.429 |
| cg06573254           | 5          | 174909270             | SFXN1       | 5'UTR/1st intron        | S_Shelf               | 0.758±0.049                     | 0.444±0.173             | 0.315              | 4.02E-07       | 2.66E-42                                                        | -0.604 |
| cg00013196           | 8          | 88885254              | DCAF4L2     | 1st exon                | N_Shore               | 0.601±0.174                     | 0.287±0.119             | 0.315              | 9.14E-04       | 1.20E-17                                                        | -0.404 |
| cg02426414           | 17         | 18265933              | SHMT1       | 5'UTR/1st intron        | N_Shore               | 0.559±0.155                     | 0.245±0.069             | 0.314              | 5.11E-04       | 3.56E-10                                                        | -0.303 |
| cg19595092           | 8          | 22227320              | SLC39A14    | 5'UTR/1st intron        | S_Shelf               | 0.611±0.151                     | 0.298±0.1               | 0.314              | 3.26E-04       | 8.17E-07                                                        | -0.240 |

|            |    |           |          |                  |         |             |             |       |          |          |        |
|------------|----|-----------|----------|------------------|---------|-------------|-------------|-------|----------|----------|--------|
| cg24469729 | 7  | 27160520  | HOXA3    | 5'UTR            | N_Shelf | 0.525±0.058 | 0.214±0.08  | 0.311 | 1.27E-09 | 4.63E-10 | -0.301 |
| cg20901787 | 17 | 79936477  | ASPSCR1  | 5'UTR/1st intron | S_Shore | 0.63±0.161  | 0.319±0.086 | 0.311 | 6.36E-04 | 2.10E-09 | -0.290 |
| cg07074042 | 22 | 30783944  | RNF215   | TSS1500          | S_Shore | 0.539±0.134 | 0.228±0.102 | 0.311 | 1.21E-04 | 7.32E-10 | -0.297 |
| cg04930693 | 1  | 8083186   | ERRF1    | 5'UTR/1st intron | N_Shelf | 0.714±0.171 | 0.403±0.12  | 0.311 | 8.33E-04 | 1.02E-10 | -0.311 |
| cg02923856 | 3  | 23989124  | NR1D2    | 5'UTR/1st intron | S_Shore | 0.49±0.175  | 0.179±0.149 | 0.311 | 9.63E-04 | 3.91E-09 | -0.285 |
| cg02310286 | 8  | 88886432  | DCAF4L2  | TSS200           | Island  | 0.567±0.223 | 0.258±0.122 | 0.309 | 5.05E-03 | 4.63E-20 | -0.431 |
| cg07726085 | 19 | 59022705  | SLC27A5  | 1st exon         | N_Shelf | 0.604±0.097 | 0.294±0.09  | 0.309 | 4.27E-06 | 1.15E-30 | -0.526 |
| cg00431187 | 7  | 27161749  | HOXA3    | 5'UTR            | N_Shelf | 0.59±0.08   | 0.281±0.096 | 0.309 | 2.46E-07 | 3.32E-09 | -0.286 |
| cg09451188 | 13 | 45989144  | SLC25A30 | 5'UTR/1st intron | N_Shelf | 0.451±0.179 | 0.144±0.075 | 0.308 | 1.52E-03 | 4.20E-08 | -0.266 |
| cg20303572 | 2  | 38602546  | ATL2     | 5'UTR/1st intron | N_Shore | 0.687±0.149 | 0.38±0.129  | 0.307 | 2.83E-04 | 4.01E-13 | -0.348 |
| cg00142933 | 2  | 128420784 | LIMS2    | 5'UTR/1st intron | N_Shore | 0.755±0.084 | 0.448±0.196 | 0.307 | 9.42E-06 | 2.29E-15 | -0.377 |
| cg16295676 | 10 | 124766619 | IKZF5    | 5'UTR            | N_Shore | 0.707±0.062 | 0.4±0.171   | 0.306 | 6.89E-07 | 2.74E-05 | -0.205 |
| cg09437283 | 3  | 13008096  | IQSEC1   | 5'UTR/1st intron | N_Shore | 0.484±0.136 | 0.178±0.077 | 0.306 | 2.10E-04 | 6.49E-10 | -0.298 |
| cg24483493 | 15 | 63333476  | TPM1     | TSS1500          | N_Shore | 0.588±0.17  | 0.282±0.158 | 0.305 | 8.80E-04 | 6.85E-06 | -0.220 |
| cg15410675 | 4  | 154144800 | TRIM2    | 5'UTR/1st intron | S_Shore | 0.448±0.151 | 0.142±0.078 | 0.305 | 4.93E-04 | 3.13E-08 | -0.268 |
| cg21852589 | 7  | 142981689 | TMEM139  | TSS1500          | N_Shelf | 0.625±0.171 | 0.32±0.144  | 0.305 | 9.41E-04 | 9.20E-18 | -0.406 |
| cg08755736 | 8  | 95957928  | TP53INP1 | 5'UTR/1st intron | N_Shelf | 0.482±0.171 | 0.178±0.073 | 0.305 | 1.22E-03 | 2.09E-05 | -0.208 |
| cg07649206 | 3  | 170742094 | SLC2A2   | 5'UTR/1st intron | N_Shelf | 0.58±0.149  | 0.277±0.08  | 0.303 | 4.52E-04 | 1.76E-14 | -0.366 |
| cg05578673 | 1  | 90307339  | LRRC8D   | 5'UTR/1st intron | N_Shore | 0.663±0.167 | 0.36±0.163  | 0.303 | 8.19E-04 | 3.11E-05 | -0.204 |
| cg03585070 | 1  | 205602206 | ELK4     | TSS1500          | S_Shore | 0.791±0.033 | 0.488±0.187 | 0.303 | 2.27E-06 | 5.06E-07 | -0.244 |
| cg23361969 | 3  | 184971183 | EHHADH   | 5'UTR/1st intron | N_Shore | 0.487±0.15  | 0.184±0.076 | 0.303 | 4.90E-04 | 2.69E-06 | -0.229 |
| cg01390728 | 17 | 45919287  | SCRN2    | TSS1500          | S_Shore | 0.634±0.175 | 0.331±0.13  | 0.302 | 1.20E-03 | 9.91E-10 | -0.295 |
| cg17848496 | 2  | 227661213 | IRS1     | 1st exon         | N_Shore | 0.567±0.18  | 0.265±0.104 | 0.302 | 1.60E-03 | 7.26E-19 | -0.418 |
| cg00492055 | 3  | 138312356 | CEP70    | 5'UTR/1st intron | N_Shore | 0.554±0.163 | 0.252±0.091 | 0.302 | 8.43E-04 | 4.34E-10 | -0.301 |
| cg00653085 | 1  | 53385434  | ECHDC2   | 5'UTR/1st intron | N_Shore | 0.532±0.067 | 0.23±0.075  | 0.302 | 3.30E-08 | 4.37E-23 | -0.461 |
| cg11654662 | 17 | 18264018  | SHMT1    | 5'UTR/1st intron | N_Shelf | 0.604±0.146 | 0.302±0.128 | 0.302 | 2.77E-04 | 2.24E-35 | -0.560 |
| cg26034799 | 9  | 5185804   | INSL6    | TSS200           | S_Shore | 0.57±0.084  | 0.268±0.112 | 0.302 | 5.85E-07 | 5.43E-06 | -0.222 |
| cg17777531 | 8  | 88885043  | DCAF4L2  | 1st exon         | N_Shore | 0.555±0.155 | 0.254±0.128 | 0.301 | 4.85E-04 | 1.86E-13 | -0.352 |
| cg23731272 | 15 | 67356838  | SMAD3    | TSS1500          | N_Shore | 0.545±0.203 | 0.244±0.092 | 0.301 | 3.62E-03 | 5.20E-08 | -0.264 |
| cg14554415 | 15 | 69222988  | SPESP1   | 5'UTR/1st exon   | Island  | 0.567±0.134 | 0.266±0.121 | 0.301 | 1.35E-04 | 1.04E-05 | -0.215 |
| cg17213304 | 5  | 78364769  | BHMT2    | TSS1500          | N_Shore | 0.696±0.118 | 0.395±0.184 | 0.300 | 6.63E-05 | 1.65E-69 | -0.729 |
| cg00383081 | 1  | 182362088 | GLUL     | TSS1500          | S_Shore | 0.727±0.096 | 0.427±0.288 | 0.300 | 6.12E-04 | 8.34E-65 | -0.711 |
| cg09593860 | 11 | 113929287 | ZBTB16   | TSS1500          | N_Shore | 0.624±0.198 | 0.324±0.181 | 0.300 | 3.10E-03 | 1.37E-07 | -0.256 |
| cg23449764 | 11 | 915337    | CHID1    | TSS1500          | S_Shelf | 0.558±0.126 | 0.259±0.159 | 0.299 | 8.31E-05 | 4.13E-10 | -0.302 |
| cg16674116 | 11 | 1319689   | TOLLIP   | 5'UTR/1st intron | S_Shelf | 0.741±0.084 | 0.443±0.109 | 0.298 | 6.03E-07 | 3.18E-21 | -0.443 |
| cg01573501 | 4  | 108910070 | HADH     | TSS1500          | N_Shore | 0.582±0.155 | 0.284±0.087 | 0.298 | 6.37E-04 | 2.03E-12 | -0.337 |
| cg21048763 | 17 | 77979797  | TBC1D16  | 5'UTR/1st intron | S_Shore | 0.623±0.195 | 0.325±0.138 | 0.298 | 2.80E-03 | 2.96E-05 | -0.204 |
| cg01371233 | 16 | 30456325  | SEPHS2   | 1st exon         | N_Shore | 0.524±0.159 | 0.226±0.053 | 0.298 | 9.38E-04 | 3.99E-17 | -0.398 |
| cg03032025 | 5  | 173316748 | CPEB4    | 1st exon         | S_Shore | 0.533±0.126 | 0.236±0.077 | 0.298 | 1.30E-04 | 2.00E-08 | -0.272 |
| cg06285337 | 16 | 27281406  | NSMCE1   | TSS1500          | S_Shore | 0.579±0.158 | 0.281±0.067 | 0.298 | 8.67E-04 | 2.85E-06 | -0.228 |
| cg16973107 | 12 | 57828180  | INHBC    | TSS1500          | S_Shelf | 0.57±0.167  | 0.273±0.08  | 0.297 | 1.14E-03 | 6.99E-08 | -0.262 |
| cg19841423 | 20 | 62366755  | LIME1    | TSS1500          | N_Shelf | 0.642±0.116 | 0.345±0.123 | 0.297 | 3.46E-05 | 6.28E-17 | -0.396 |
| cg01662334 | 7  | 27704065  | HIBADH   | TSS1500          | S_Shore | 0.715±0.095 | 0.418±0.2   | 0.297 | 2.96E-05 | 1.75E-32 | -0.539 |
| cg10881745 | 2  | 216945596 | TMEM169  | TSS1500          | N_Shore | 0.548±0.155 | 0.251±0.082 | 0.297 | 6.86E-04 | 1.57E-11 | -0.324 |
| cg25302704 | 8  | 27470629  | CLU      | 5'UTR/1st intron | N_Shore | 0.609±0.155 | 0.313±0.121 | 0.296 | 5.77E-04 | 4.11E-12 | -0.333 |
| cg19506201 | 17 | 79936561  | ASPSCR1  | 5'UTR/1st intron | S_Shore | 0.586±0.142 | 0.29±0.079  | 0.296 | 3.65E-04 | 7.05E-11 | -0.314 |
| cg19442470 | 8  | 27470225  | CLU      | 5'UTR/1st intron | N_Shore | 0.58±0.125  | 0.285±0.089 | 0.296 | 1.09E-04 | 2.24E-07 | -0.252 |
| cg24214471 | 20 | 36154292  | BLCAP    | 5'UTR/1st intron | S_Shelf | 0.493±0.122 | 0.198±0.081 | 0.295 | 1.02E-04 | 5.21E-13 | -0.346 |
| cg00994717 | 10 | 102731539 | SEMA4G   | TSS1500          | S_Shore | 0.606±0.112 | 0.311±0.081 | 0.295 | 4.40E-05 | 8.95E-15 | -0.370 |
| cg14222630 | 9  | 127961717 | RABEPK   | TSS1500          | N_Shore | 0.717±0.201 | 0.422±0.204 | 0.295 | 4.19E-03 | 9.72E-12 | -0.327 |
| cg12559925 | 2  | 235863365 | SH3BP4   | 5'UTR/1st intron | S_Shore | 0.676±0.138 | 0.382±0.181 | 0.295 | 2.63E-04 | 1.02E-26 | -0.494 |
| cg11830061 | 9  | 5185415   | INSL6    | 1st exon         | Island  | 0.707±0.09  | 0.413±0.173 | 0.294 | 8.39E-06 | 5.13E-10 | -0.300 |
| cg09484541 | 5  | 74161187  | FAM169A  | 5'UTR/1st intron | N_Shore | 0.538±0.161 | 0.244±0.119 | 0.294 | 8.05E-04 | 1.64E-09 | -0.291 |
| cg24277788 | 4  | 185724837 | ACSL1    | 5'UTR/1st intron | S_Shore | 0.552±0.135 | 0.258±0.075 | 0.294 | 2.68E-04 | 1.41E-13 | -0.354 |
| cg21871746 | 7  | 99616820  | ZKSCAN1  | 5'UTR/1st intron | S_Shelf | 0.606±0.109 | 0.312±0.139 | 0.294 | 1.96E-05 | 1.34E-08 | -0.275 |
| cg26721627 | 11 | 1319713   | TOLLIP   | 5'UTR/1st intron | S_Shelf | 0.64±0.099  | 0.346±0.082 | 0.294 | 1.22E-05 | 1.27E-20 | -0.437 |
| cg06837799 | 7  | 27160960  | HOXA3    | 5'UTR            | N_Shelf | 0.484±0.11  | 0.19±0.089  | 0.294 | 3.26E-05 | 1.07E-14 | -0.368 |
| cg23974688 | 17 | 49333393  | MBTD1    | 5'UTR            | N_Shelf | 0.513±0.139 | 0.22±0.071  | 0.293 | 3.57E-04 | 1.18E-11 | -0.326 |
| cg12277225 | 13 | 52734032  | NEK3     | TSS1500          | S_Shore | 0.58±0.147  | 0.287±0.131 | 0.293 | 3.89E-04 | 5.33E-09 | -0.283 |
| cg19853565 | 19 | 2540907   | GNG7     | 5'UTR            | Island  | 0.547±0.175 | 0.254±0.099 | 0.293 | 1.61E-03 | 8.75E-06 | -0.217 |
| cg11436087 | 12 | 57827593  | INHBC    | TSS1500          | S_Shelf | 0.696±0.122 | 0.403±0.149 | 0.293 | 7.33E-05 | 1.35E-10 | -0.309 |
| cg07704990 | 5  | 101834577 | SLC06A1  | 5'UTR/1st exon   | Island  | 0.746±0.113 | 0.453±0.133 | 0.293 | 3.06E-05 | 5.54E-07 | -0.244 |
| cg01897036 | 2  | 120282327 | SCTR     | TSS1500          | S_Shore | 0.725±0.084 | 0.432±0.241 | 0.292 | 1.35E-04 | 5.32E-07 | -0.244 |
| cg02571470 | 2  | 73294845  | SFXN5    | 5'UTR/1st intron | N_Shelf | 0.496±0.048 | 0.204±0.059 | 0.292 | 2.96E-10 | 1.17E-24 | -0.476 |
| cg22856114 | 2  | 128175905 | PROC     | TSS200           | S_Shelf | 0.553±0.164 | 0.261±0.085 | 0.292 | 1.13E-03 | 2.55E-10 | -0.305 |
| cg22957206 | 3  | 184096500 | THPO     | 5'UTR/1st intron | N_Shelf | 0.735±0.121 | 0.443±0.102 | 0.292 | 7.37E-05 | 2.01E-32 | -0.539 |
| cg22957206 | 3  | 184096500 | CHRD     | TSS1500          | N_Shelf | 0.735±0.121 | 0.443±0.102 | 0.292 | 7.37E-05 | 6.65E-09 | -0.281 |
| cg07331053 | 8  | 27347861  | EPHX2    | TSS1500          | N_Shore | 0.556±0.107 | 0.265±0.094 | 0.292 | 2.22E-05 | 1.61E-16 | -0.392 |
| cg20976694 | 18 | 55714052  | NEDD4L   | TSS1500          | S_Shore | 0.499±0.162 | 0.208±0.076 | 0.291 | 1.09E-03 | 1.11E-09 | -0.294 |
| cg08621893 | 4  | 123841798 | NUDT6    | 5'UTR/1st intron | N_Shelf | 0.598±0.18  | 0.307±0.133 | 0.291 | 1.91E-03 | 3.47E-06 | -0.226 |
| cg04977856 | 14 | 89886941  | FOXN3    | 5'UTR/1st intron | S_Shelf | 0.541±0.115 | 0.25±0.068  | 0.291 | 8.28E-05 | 3.36E-06 | -0.227 |
| cg11233163 | 3  | 23955549  | NKIRAS1  | 5'UTR/1st intron | N_Shelf | 0.522±0.143 | 0.231±0.074 | 0.290 | 4.56E-04 | 1.62E-05 | -0.211 |
| cg06682875 | 5  | 115150172 | CDO1     | 5'UTR/1st intron | N_Shore | 0.528±0.165 | 0.238±0.068 | 0.290 | 1.31E-03 | 1.21E-28 | -0.510 |
| cg14864022 | 6  | 7142610   | RREB1    | 5'UTR/1st intron | S_Shore | 0.648±0.144 | 0.36±0.089  | 0.289 | 4.62E-04 | 4.15E-05 | -0.200 |
| cg20227860 | 4  | 39368720  | RFC1     | TSS1500          | S_Shore | 0.557±0.155 | 0.268±0.079 | 0.289 | 8.36E-04 | 2.63E-11 | -0.321 |
| cg10117831 | 14 | 89881817  | FOXN3    | 5'UTR/1st intron | N_Shore | 0.546±0.172 | 0.258±0.159 | 0.288 | 1.48E-03 | 7.62E-12 | -0.329 |
| cg23072629 | 2  | 239195537 | PER2     | 5'UTR/1st intron | N_Shore | 0.504±0.127 | 0.215±0.08  | 0.288 | 1.72E-04 | 7.41E-07 | -0.241 |
| cg06687091 | 18 | 43912991  | RNF165   | TSS1500          | N_Shore | 0.687±0.137 | 0.398±0.184 | 0.288 | 3.13E-04 | 8.94E-31 | -0.527 |
| cg19458020 | 17 | 38473119  | RARA     | 5'UTR/1st intron | Island  | 0.474±0.13  | 0.186±0.104 | 0.288 | 1.66E-04 | 1.11E-07 | -0.258 |
| cg04350520 | 7  | 95027158  | PON3     | TSS1500          | S_Shore | 0.494±0.125 | 0.206±0.081 | 0.288 | 1.54E-04 | 9.47E-09 | -0.278 |
| cg08377000 | 4  | 90033921  | TIGD2    | TSS200           | S_Shore | 0.672±0.145 | 0.384±0.205 | 0.288 | 6.43E-04 | 2.40E-34 | -0.553 |
| cg17145652 | 8  | 42750650  | RNF170   | 5'UTR/1st intron | N_Shore | 0.549±0.181 | 0.261±0.118 | 0.288 | 2.17E-03 | 9.58E-12 | -0.327 |
| cg17782713 | 10 | 22613360  | BMI1     | 5'UTR/1st intron | N_Shore | 0.714±0.084 | 0.426±0.174 | 0.288 | 8.02E-06 | 2.30E-09 | -0.289 |
| cg18051316 | 6  | 31925660  | SKIV2L   | TSS1500          | N_Shore | 0.597±0.122 | 0.31±0.13   | 0.288 | 8.35E-05 | 2.49E-07 | -0.251 |
| cg16922340 | 20 | 33873526  | EIF6     | TSS1500          | S_Shore | 0.587±0.149 | 0.301±0.076 | 0.287 | 6.89E-04 | 8.59E-11 | -0.313 |
| cg19326543 | 2  | 128422715 | LIMS2    | 5'UTR/1st intron | S_Shore | 0.57±0.138  | 0.284±0.095 | 0.287 | 3.29E-04 | 1.20E-10 | -0.310 |
| cg00590251 | 2  | 119980583 | STEAP3   | TSS1500          | N_Shore | 0.799       |             |       |          |          |        |

|            |    |           |          |                  |         |             |             |       |          |          |        |
|------------|----|-----------|----------|------------------|---------|-------------|-------------|-------|----------|----------|--------|
| cg05169454 | 2  | 38602911  | ATL2     | 5'UTR/1st intron | N_Shore | 0.541±0.145 | 0.255±0.094 | 0.286 | 4.95E-04 | 9.22E-13 | -0.342 |
| cg05380921 | 16 | 46921663  | GPT2     | 5'UTR            | S_Shelf | 0.503±0.154 | 0.217±0.065 | 0.286 | 9.44E-04 | 2.69E-21 | -0.444 |
| cg11365440 | 3  | 46608179  | LRRC2    | TSS200           | S_Shore | 0.486±0.152 | 0.2±0.081   | 0.286 | 7.67E-04 | 6.32E-13 | -0.345 |
| cg23011886 | 5  | 179230002 | MGAT4B   | TSS200           | N_Shelf | 0.509±0.153 | 0.223±0.067 | 0.286 | 8.87E-04 | 1.40E-09 | -0.293 |
| cg14166189 | 11 | 915440    | CHID1    | TSS1500          | S_Shelf | 0.716±0.103 | 0.431±0.264 | 0.285 | 5.93E-04 | 9.04E-12 | -0.328 |
| cg03065308 | 6  | 137538584 | IFNGR1   | 5'UTR/1st intron | N_Shore | 0.571±0.176 | 0.286±0.193 | 0.285 | 2.16E-03 | 4.11E-18 | -0.410 |
| cg15507475 | 7  | 75624460  | TMEM120A | TSS1500          | S_Shore | 0.555±0.153 | 0.27±0.095  | 0.285 | 7.50E-04 | 2.82E-10 | -0.304 |
| cg09246479 | 22 | 24891129  | UPB1     | TSS200           | Island  | 0.554±0.148 | 0.269±0.088 | 0.285 | 6.35E-04 | 3.78E-13 | -0.348 |
| cg22707705 | 2  | 219646114 | CYP27A1  | TSS1500          | N_Shore | 0.453±0.142 | 0.168±0.083 | 0.285 | 4.80E-04 | 1.02E-07 | -0.259 |
| cg01345727 | 13 | 52734018  | NEK3     | TSS1500          | S_Shore | 0.522±0.153 | 0.238±0.131 | 0.284 | 6.71E-04 | 2.04E-05 | -0.208 |
| cg21761922 | 3  | 16309088  | OXNAD1   | 5'UTR/1st intron | S_Shelf | 0.601±0.167 | 0.318±0.13  | 0.284 | 1.33E-03 | 8.09E-26 | -0.486 |
| cg07104895 | 17 | 79936499  | ASPSCR1  | 5'UTR/1st intron | S_Shore | 0.571±0.14  | 0.288±0.077 | 0.283 | 4.52E-04 | 1.18E-09 | -0.294 |
| cg11168687 | 4  | 185726782 | ACSL1    | 5'UTR/1st exon   | S_Shelf | 0.507±0.116 | 0.223±0.067 | 0.283 | 1.12E-04 | 6.80E-06 | -0.220 |
| cg01879083 | 5  | 10306031  | CMBL     | 5'UTR/1st intron | N_Shore | 0.599±0.183 | 0.316±0.157 | 0.283 | 2.64E-03 | 1.98E-52 | -0.658 |
| cg25610294 | 14 | 247777910 | CIDEB    | 5'UTR            | N_Shore | 0.73±0.067  | 0.448±0.151 | 0.283 | 8.16E-07 | 7.36E-22 | -0.449 |
| cg25610294 | 14 | 247777910 | LTB4R2   | TSS1500          | N_Shore | 0.73±0.067  | 0.448±0.151 | 0.283 | 8.16E-07 | 3.40E-12 | -0.334 |
| cg19212391 | 17 | 72432790  | GPRC5C   | 5'UTR/1st intron | S_Shelf | 0.546±0.13  | 0.263±0.078 | 0.282 | 2.54E-04 | 6.20E-12 | -0.330 |
| cg20100668 | 8  | 88885469  | DCAF4L2  | 1st exon         | N_Shore | 0.504±0.133 | 0.222±0.075 | 0.282 | 3.28E-04 | 1.27E-15 | -0.380 |
| cg04118119 | 13 | 47371987  | ESD      | TSS1500          | S_Shore | 0.564±0.163 | 0.282±0.085 | 0.282 | 1.33E-03 | 7.30E-10 | -0.297 |
| cg02486855 | 15 | 67356942  | SMAD3    | TSS1500          | N_Shore | 0.477±0.188 | 0.195±0.071 | 0.282 | 3.42E-03 | 8.06E-07 | -0.240 |
| cg09993814 | 20 | 36154222  | BLCAP    | 5'UTR/1st intron | S_Shelf | 0.485±0.111 | 0.203±0.097 | 0.282 | 4.75E-05 | 3.50E-17 | -0.399 |
| cg07843390 | 19 | 2541015   | GNG7     | 5'UTR            | Island  | 0.531±0.149 | 0.25±0.099  | 0.281 | 6.80E-04 | 2.55E-05 | -0.206 |
| cg22455392 | 5  | 169659831 | Csorf58  | TSS200           | Island  | 0.751±0.096 | 0.47±0.219  | 0.281 | 1.32E-04 | 5.74E-16 | -0.385 |
| cg26783146 | 16 | 4423632   | VASN     | 5'UTR/1st intron | S_Shore | 0.537±0.139 | 0.256±0.077 | 0.281 | 4.54E-04 | 1.98E-05 | -0.209 |
| cg05489957 | 6  | 30177295  | TRIM26   | 5'UTR/1st intron | N_Shelf | 0.478±0.139 | 0.198±0.076 | 0.281 | 4.57E-04 | 2.67E-12 | -0.336 |
| cg22780475 | 19 | 45281526  | CBLC     | 1st exon         | S_Shore | 0.611±0.141 | 0.33±0.104  | 0.281 | 4.21E-04 | 9.20E-13 | -0.342 |
| cg18241308 | 7  | 95026502  | PON3     | TSS1500          | S_Shore | 0.474±0.111 | 0.193±0.079 | 0.281 | 6.51E-05 | 3.53E-08 | -0.267 |
| cg14153624 | 13 | 98626476  | IPO5     | 5'UTR            | N_Shore | 0.7±0.13    | 0.42±0.167  | 0.280 | 2.32E-04 | 9.59E-08 | -0.259 |
| cg08124399 | 6  | 74104868  | DDX43    | 1st exon         | Island  | 0.679±0.177 | 0.399±0.154 | 0.280 | 2.20E-03 | 6.66E-12 | -0.330 |
| cg15891218 | 14 | 61748354  | TMEM30B  | 5'UTR/1st exon   | S_Shore | 0.549±0.134 | 0.27±0.134  | 0.280 | 2.46E-04 | 2.24E-11 | -0.322 |
| cg20123637 | 3  | 133467435 | TF       | 5'UTR/1st intron | S_Shelf | 0.538±0.13  | 0.258±0.07  | 0.279 | 3.01E-04 | 1.12E-11 | -0.326 |
| cg03481658 | 7  | 6051355   | AIMP2    | 5'UTR            | S_Shelf | 0.623±0.086 | 0.344±0.122 | 0.279 | 2.28E-06 | 6.17E-10 | -0.299 |
| cg03821443 | 11 | 1320329   | TOLLIP   | 5'UTR/1st intron | S_Shelf | 0.499±0.162 | 0.22±0.076  | 0.279 | 1.47E-03 | 2.45E-12 | -0.336 |
| cg04819351 | 15 | 36872220  | C15orf41 | 5'UTR/1st intron | S_Shore | 0.476±0.118 | 0.197±0.097 | 0.279 | 9.53E-05 | 2.35E-08 | -0.271 |
| cg08083088 | 11 | 118899758 | SLC37A4  | 5'UTR            | N_Shore | 0.53±0.175  | 0.251±0.082 | 0.279 | 2.32E-03 | 9.27E-06 | -0.216 |
| cg12508078 | 17 | 27505845  | MYO18A   | 5'UTR/1st intron | S_Shore | 0.493±0.144 | 0.214±0.079 | 0.279 | 6.30E-04 | 1.59E-06 | -0.234 |
| cg07294814 | 8  | 144348648 | GLI4     | TSS1500          | N_Shore | 0.513±0.172 | 0.234±0.082 | 0.279 | 2.06E-03 | 6.97E-07 | -0.242 |
| cg11625933 | 3  | 81811322  | GBE1     | TSS1500          | S_Shore | 0.44±0.155  | 0.161±0.085 | 0.279 | 1.05E-03 | 1.13E-10 | -0.311 |
| cg18069356 | 17 | 66594875  | FAM20A   | 5'UTR/1st intron | N_Shore | 0.512±0.162 | 0.234±0.076 | 0.278 | 1.45E-03 | 1.49E-07 | -0.255 |
| cg15835805 | 5  | 132162441 | SHROOM1  | 5'UTR            | S_Shore | 0.44±0.116  | 0.162±0.069 | 0.278 | 1.22E-04 | 2.61E-12 | -0.336 |
| cg17152436 | 11 | 1318418   | TOLLIP   | 5'UTR/1st intron | S_Shore | 0.861±0.117 | 0.582±0.283 | 0.278 | 1.62E-03 | 2.08E-14 | -0.365 |
| cg01241390 | 5  | 80596277  | ZCCHC9   | TSS1500          | N_Shore | 0.495±0.115 | 0.217±0.086 | 0.278 | 8.53E-05 | 1.61E-10 | -0.308 |
| cg21126626 | 5  | 68787747  | OCLN     | TSS1500          | N_Shore | 0.461±0.134 | 0.184±0.072 | 0.278 | 4.02E-04 | 5.74E-07 | -0.243 |
| cg20029140 | 10 | 12235293  | NUDT5    | 5'UTR/1st intron | N_Shelf | 0.596±0.143 | 0.318±0.087 | 0.278 | 5.68E-04 | 5.42E-18 | -0.408 |
| cg04919234 | 6  | 99392478  | FBXL4    | 5'UTR/1st intron | N_Shelf | 0.555±0.154 | 0.278±0.07  | 0.277 | 1.12E-03 | 2.07E-09 | -0.290 |
| cg14494812 | 17 | 48941039  | TOB1     | 5'UTR            | N_Shore | 0.544±0.141 | 0.266±0.077 | 0.277 | 5.60E-04 | 2.60E-18 | -0.412 |
| cg06090298 | 10 | 89263946  | MINPP1   | TSS1500          | N_Shore | 0.708±0.122 | 0.431±0.154 | 0.276 | 1.41E-04 | 1.45E-06 | -0.235 |
| cg25879118 | 7  | 95026672  | PON3     | TSS1500          | S_Shore | 0.522±0.119 | 0.245±0.082 | 0.276 | 1.37E-04 | 1.15E-07 | -0.258 |
| cg08651937 | 3  | 156530506 | PA2G4P4  | TSS1500          | N_Shelf | 0.486±0.125 | 0.209±0.056 | 0.276 | 2.96E-04 | 3.00E-05 | -0.204 |
| cg19074198 | 21 | 46954058  | SLC19A1  | 5'UTR            | N_Shelf | 0.761±0.057 | 0.485±0.181 | 0.276 | 5.95E-06 | 1.36E-15 | -0.380 |
| cg22558871 | 7  | 72723150  | NSUN5    | TSS1500          | S_Shore | 0.465±0.202 | 0.19±0.099  | 0.275 | 5.75E-03 | 4.18E-06 | -0.225 |
| cg18560264 | 3  | 52324089  | GLYCTK   | 5'UTR/1st intron | S_Shelf | 0.497±0.159 | 0.221±0.068 | 0.275 | 1.44E-03 | 1.21E-10 | -0.310 |
| cg00202496 | 16 | 11037903  | CLEC16A  | TSS1500          | S_Shore | 0.489±0.129 | 0.214±0.08  | 0.275 | 2.96E-04 | 6.72E-06 | -0.220 |
| cg00008971 | 1  | 45966925  | MMACHC   | 5'UTR/1st intron | S_Shore | 0.54±0.132  | 0.265±0.071 | 0.275 | 3.87E-04 | 6.74E-13 | -0.344 |
| cg16129213 | 21 | 33030780  | SOD1     | TSS1500          | N_Shore | 0.613±0.168 | 0.339±0.093 | 0.274 | 1.90E-03 | 4.88E-10 | -0.300 |
| cg24083364 | 1  | 2325254   | RER1     | 5'UTR/1st intron | S_Shore | 0.645±0.158 | 0.371±0.109 | 0.274 | 1.19E-03 | 6.99E-08 | -0.262 |
| cg00944166 | 5  | 101834675 | SLC06A1  | 5'UTR/1st exon   | Island  | 0.733±0.143 | 0.459±0.201 | 0.274 | 8.59E-04 | 8.11E-09 | -0.279 |
| cg00054210 | 8  | 65711644  | CYP7B1   | TSS1500          | Island  | 0.406±0.152 | 0.133±0.105 | 0.274 | 2.15E-03 | 1.21E-13 | -0.354 |
| cg01206378 | 1  | 95698827  | RWDD3    | TSS1500          | N_Shore | 0.423±0.138 | 0.149±0.066 | 0.274 | 5.85E-04 | 6.25E-06 | -0.221 |
| cg06264922 | 11 | 1319648   | TOLLIP   | 5'UTR/1st intron | S_Shelf | 0.611±0.058 | 0.337±0.082 | 0.274 | 9.77E-09 | 1.97E-22 | -0.455 |
| cg17875935 | 15 | 45666384  | GATM     | 5'UTR            | N_Shelf | 0.487±0.115 | 0.213±0.066 | 0.273 | 1.37E-04 | 7.58E-06 | -0.219 |
| cg04071104 | 3  | 53878642  | CHDH     | 5'UTR/1st intron | N_Shore | 0.617±0.208 | 0.344±0.15  | 0.273 | 7.12E-03 | 2.41E-13 | -0.350 |
| cg06073041 | 5  | 141346577 | RNF14    | 5'UTR/1st intron | N_Shore | 0.65±0.171  | 0.377±0.195 | 0.273 | 2.59E-03 | 7.24E-06 | -0.219 |
| cg05875176 | 17 | 66594586  | FAM20A   | 5'UTR/1st intron | N_Shore | 0.543±0.145 | 0.27±0.099  | 0.273 | 6.78E-04 | 1.14E-19 | -0.427 |
| cg03044471 | 11 | 1321009   | TOLLIP   | 5'UTR/1st intron | S_Shelf | 0.712±0.141 | 0.439±0.202 | 0.273 | 8.53E-04 | 7.36E-06 | -0.219 |
| cg15589042 | 17 | 4691376   | GLTPD2   | TSS1500          | S_Shore | 0.644±0.135 | 0.371±0.109 | 0.272 | 3.51E-04 | 1.86E-09 | -0.291 |
| cg13859860 | 10 | 51569878  | NCOA4    | 5'UTR/1st intron | N_Shelf | 0.674±0.04  | 0.402±0.119 | 0.272 | 9.96E-09 | 1.34E-09 | -0.293 |
| cg04290171 | 1  | 207924482 | CD46     | TSS1500          | N_Shore | 0.479±0.139 | 0.207±0.077 | 0.272 | 5.63E-04 | 4.10E-05 | -0.201 |
| cg16265717 | 1  | 65993149  | LEPR     | 5'UTR            | S_Shore | 0.441±0.117 | 0.168±0.07  | 0.272 | 1.57E-04 | 3.46E-06 | -0.226 |
| cg18198550 | 6  | 35889893  | SRPK1    | TSS1500          | S_Shore | 0.614±0.18  | 0.341±0.142 | 0.272 | 2.95E-03 | 1.43E-05 | -0.212 |
| cg00421645 | 5  | 43312201  | HMGCS1   | 5'UTR/1st intron | N_Shore | 0.501±0.136 | 0.229±0.08  | 0.272 | 4.71E-04 | 6.69E-12 | -0.330 |
| cg17379666 | 17 | 71304784  | CDC42EP4 | 5'UTR/1st intron | N_Shelf | 0.458±0.118 | 0.186±0.086 | 0.272 | 1.28E-04 | 2.25E-11 | -0.322 |
| cg02179764 | 22 | 37419795  | MPST     | 5'UTR            | S_Shelf | 0.542±0.116 | 0.27±0.08   | 0.272 | 1.23E-04 | 2.56E-14 | -0.364 |
| cg24194775 | 9  | 35791475  | NPR2     | TSS1500          | S_Shore | 0.45±0.151  | 0.179±0.104 | 0.271 | 9.13E-04 | 1.82E-13 | -0.352 |
| cg14489933 | 2  | 128422619 | LIMS2    | 5'UTR/1st intron | S_Shore | 0.673±0.096 | 0.402±0.162 | 0.271 | 2.64E-05 | 2.29E-26 | -0.491 |
| cg11518349 | 1  | 247171838 | ZNF695   | TSS1500          | S_Shore | 0.648±0.151 | 0.377±0.177 | 0.271 | 1.06E-03 | 5.56E-11 | -0.316 |
| cg24994355 | 10 | 99445520  | AVP11    | 5'UTR/1st intron | N_Shore | 0.519±0.143 | 0.248±0.072 | 0.271 | 7.48E-04 | 7.42E-08 | -0.261 |
| cg07906527 | 1  | 204116483 | ETNK2    | 5'UTR/1st intron | N_Shelf | 0.585±0.159 | 0.314±0.096 | 0.271 | 1.45E-03 | 2.41E-39 | -0.586 |
| cg07062764 | 3  | 170744540 | SLC2A2   | 5'UTR/1st exon   | N_Shore | 0.541±0.144 | 0.27±0.076  | 0.270 | 7.65E-04 | 2.78E-07 | -0.250 |
| cg16806210 | 11 | 118398318 | TTC36    | 1st exon         | N_Shelf | 0.717±0.047 | 0.446±0.172 | 0.270 | 3.56E-06 | 6.37E-42 | -0.602 |
| cg16297435 | 6  | 43028296  | KLC4     | 5'UTR            | S_Shore | 0.523±0.143 | 0.252±0.075 | 0.270 | 7.57E-04 | 4.69E-13 | -0.346 |
| cg16297435 | 6  | 43028296  | MRPL2    | TSS1500          | S_Shore | 0.523±0.143 | 0.252±0.075 | 0.270 | 7.57E-04 | 1.04E-12 | -0.341 |
| cg03053290 | 1  | 95698378  | RWDD3    | TSS1500          | N_Shore | 0.548±0.151 | 0.278±0.101 | 0.270 | 1.00E-03 | 9.61E-07 | -0.239 |
| cg18549946 | 14 | 58862146  | TMOM20L  | TSS1500          | N_Shore | 0.465±0.106 | 0.195±0.076 | 0.270 | 5.93E-05 | 7.64E-06 | -0.218 |
| cg02439077 | 10 | 72202215  | NODAL    | 5'UTR/1st intron | S_Shore | 0.551±0.089 | 0.281±0.064 | 0.270 | 1.36E-05 | 3.43E-07 | -0.248 |
| cg02858826 | 14 | 75389222  | RPS6KL1  | TSS200           | N_Shore | 0.724±0.109 | 0.455±0.159 | 0.270 | 7.40E-05 | 2.68E-12 | -0.336 |
| cg23763877 | 20 | 5988223   | CRLS1    | 5'UTR/1st intron | S_Shore | 0.525±0.142 | 0.          |       |          |          |        |

|            |    |           |             |                  |         |             |             |       |          |          |        |
|------------|----|-----------|-------------|------------------|---------|-------------|-------------|-------|----------|----------|--------|
| cg24804106 | 8  | 18872143  | PSD3        | TSS1500          | S_Shore | 0.642±0.119 | 0.372±0.116 | 0.270 | 1.17E-04 | 1.01E-09 | -0.295 |
| cg01257194 | 9  | 116161247 | ALAD        | 5'UTR/1st intron | N_Shore | 0.525±0.096 | 0.255±0.062 | 0.269 | 3.13E-05 | 6.06E-19 | -0.419 |
| cg08597832 | 8  | 144416327 | TOP1MT      | 5'UTR            | N_Shore | 0.577±0.172 | 0.308±0.081 | 0.269 | 2.64E-03 | 2.74E-06 | -0.229 |
| cg07922062 | 19 | 33867079  | CEBPG       | 5'UTR/1st intron | S_Shelf | 0.493±0.128 | 0.224±0.062 | 0.269 | 3.84E-04 | 2.81E-13 | -0.349 |
| cg03533858 | 1  | 2324396   | RER1        | 5'UTR/1st intron | S_Shore | 0.495±0.156 | 0.226±0.066 | 0.269 | 1.49E-03 | 1.25E-05 | -0.213 |
| cg16681268 | 7  | 117067616 | ASZ1        | TSS200           | Island  | 0.848±0.16  | 0.579±0.283 | 0.269 | 5.51E-03 | 3.57E-05 | -0.202 |
| cg13913666 | 7  | 1198122   | ZFAND2A     | 5'UTR/1st intron | N_Shore | 0.464±0.131 | 0.195±0.079 | 0.269 | 4.02E-04 | 2.87E-07 | -0.250 |
| cg13892257 | 15 | 86313941  | KLHL25      | 5'UTR/1st intron | S_Shore | 0.627±0.133 | 0.358±0.18  | 0.268 | 4.83E-04 | 6.63E-11 | -0.314 |
| cg17065262 | 17 | 27506097  | MYO18A      | 5'UTR/1st intron | S_Shelf | 0.478±0.164 | 0.21±0.085  | 0.268 | 1.96E-03 | 1.27E-06 | -0.236 |
| cg00908631 | 1  | 51433616  | CDKN2C      | TSS1500          | N_Shore | 0.587±0.167 | 0.319±0.157 | 0.268 | 2.09E-03 | 9.07E-12 | -0.328 |
| cg04049033 | 17 | 1553661   | RILP        | TSS1500          | S_Shore | 0.547±0.117 | 0.279±0.081 | 0.268 | 1.45E-04 | 1.45E-08 | -0.275 |
| cg21181391 | 8  | 88886411  | DCAF4L2     | TSS200           | Island  | 0.529±0.121 | 0.261±0.114 | 0.267 | 1.49E-04 | 2.84E-15 | -0.376 |
| cg19817912 | 7  | 27162768  | HOXA3       | 5'UTR/1st intron | N_Shore | 0.548±0.069 | 0.28±0.119  | 0.267 | 3.47E-07 | 1.67E-07 | -0.254 |
| cg23146998 | 13 | 113776915 | F10         | TSS200           | S_Shelf | 0.506±0.14  | 0.239±0.083 | 0.267 | 6.73E-04 | 6.25E-08 | -0.263 |
| cg15122621 | 1  | 156341523 | RHBG        | 5'UTR/1st intron | S_Shelf | 0.467±0.114 | 0.201±0.087 | 0.266 | 1.09E-04 | 3.50E-15 | -0.375 |
| cg07147573 | 3  | 42918806  | CYP8B1      | TSS1500          | N_Shelf | 0.643±0.135 | 0.377±0.206 | 0.266 | 8.79E-04 | 5.21E-24 | -0.470 |
| cg07304015 | 11 | 47665221  | MTCH2       | TSS1500          | S_Shore | 0.513±0.154 | 0.247±0.096 | 0.266 | 1.28E-03 | 2.16E-10 | -0.306 |
| cg00744433 | 21 | 18884067  | CXADR       | TSS1500          | N_Shore | 0.51±0.148  | 0.244±0.075 | 0.266 | 1.09E-03 | 7.18E-06 | -0.219 |
| cg10961323 | 1  | 24127976  | GALE        | TSS1500          | S_Shore | 0.507±0.138 | 0.241±0.102 | 0.266 | 5.39E-04 | 5.60E-08 | -0.264 |
| cg04308185 | 17 | 38084377  | ORMDL3      | TSS1500          | S_Shore | 0.44±0.155  | 0.175±0.09  | 0.266 | 1.41E-03 | 1.24E-09 | -0.294 |
| cg06794441 | 1  | 67520733  | SLC35D1     | TSS1500          | S_Shore | 0.693±0.18  | 0.427±0.15  | 0.266 | 3.52E-03 | 2.62E-14 | -0.363 |
| cg06787519 | 5  | 78364863  | BHMT2       | TSS1500          | N_Shore | 0.54±0.115  | 0.275±0.114 | 0.265 | 9.93E-05 | 2.86E-40 | -0.592 |
| cg06639440 | 11 | 915170    | CHID1       | TSS200           | S_Shelf | 0.598±0.11  | 0.333±0.189 | 0.265 | 1.86E-04 | 1.75E-10 | -0.308 |
| cg08261841 | 7  | 142982463 | TMEM139     | 1st exon         | N_Shelf | 0.675±0.179 | 0.411±0.213 | 0.264 | 4.88E-03 | 9.21E-40 | -0.589 |
| cg14382976 | 7  | 117067624 | ASZ1        | TSS200           | Island  | 0.761±0.161 | 0.497±0.276 | 0.264 | 5.91E-03 | 3.80E-05 | -0.201 |
| cg02441982 | 17 | 76183641  | TK1         | TSS1500          | S_Shore | 0.518±0.141 | 0.254±0.068 | 0.264 | 8.33E-04 | 3.21E-06 | -0.227 |
| cg16571786 | 17 | 74237602  | RNF157      | TSS1500          | S_Shore | 0.532±0.109 | 0.269±0.131 | 0.264 | 6.14E-05 | 3.08E-10 | -0.304 |
| cg20557688 | 2  | 230133040 | PID1        | 5'UTR/1st intron | N_Shelf | 0.693±0.094 | 0.43±0.279  | 0.264 | 1.56E-03 | 1.22E-37 | -0.575 |
| cg03532673 | 7  | 102787746 | NAPEPLD     | 5'UTR/1st intron | N_Shore | 0.445±0.108 | 0.182±0.073 | 0.264 | 9.08E-05 | 4.12E-10 | -0.302 |
| cg01355753 | 16 | 30457524  | SEPHS2      | TSS1500          | S_Shore | 0.379±0.141 | 0.116±0.04  | 0.263 | 9.99E-04 | 1.64E-11 | -0.324 |
| cg01946364 | 5  | 175296158 | CPLX2       | 5'UTR            | N_Shelf | 0.558±0.129 | 0.295±0.102 | 0.263 | 3.36E-04 | 2.13E-08 | -0.272 |
| cg12910830 | 5  | 162929657 | MAT2B       | TSS1500          | N_Shelf | 0.73±0.082  | 0.467±0.215 | 0.263 | 1.46E-04 | 1.34E-07 | -0.256 |
| cg27143326 | 3  | 58227354  | ABHD6       | 5'UTR/1st intron | S_Shelf | 0.572±0.172 | 0.309±0.079 | 0.263 | 2.98E-03 | 1.04E-17 | -0.405 |
| cg04918002 | 16 | 87423124  | FBXO31      | 5'UTR            | N_Shelf | 0.552±0.154 | 0.29±0.054  | 0.263 | 1.68E-03 | 4.84E-07 | -0.245 |
| cg02709052 | 11 | 86748071  | TMEM135     | TSS1500          | N_Shore | 0.549±0.151 | 0.286±0.068 | 0.263 | 1.40E-03 | 1.95E-05 | -0.209 |
| cg06097580 | 16 | 56456934  | AMFR        | 5'UTR/1st intron | N_Shore | 0.777±0.045 | 0.514±0.176 | 0.263 | 7.04E-06 | 4.66E-19 | -0.420 |
| cg17772163 | 5  | 68787760  | OCLN        | TSS1500          | N_Shore | 0.458±0.13  | 0.196±0.078 | 0.262 | 4.31E-04 | 3.92E-08 | -0.267 |
| cg26718585 | 2  | 128176454 | PROC        | 5'UTR/1st intron | N_Shelf | 0.567±0.148 | 0.304±0.089 | 0.262 | 1.11E-03 | 2.57E-18 | -0.412 |
| cg12279019 | 6  | 43741054  | VEGFA       | 5'UTR/1st intron | S_Shore | 0.557±0.144 | 0.295±0.077 | 0.262 | 9.74E-04 | 4.52E-06 | -0.224 |
| cg24411597 | 4  | 123841683 | NUDT6       | 5'UTR/1st intron | N_Shelf | 0.687±0.183 | 0.425±0.184 | 0.262 | 4.88E-03 | 1.66E-08 | -0.274 |
| cg20874324 | 2  | 62930083  | EHBP1       | 5'UTR/1st intron | N_Shelf | 0.809±0.05  | 0.548±0.216 | 0.262 | 8.74E-05 | 4.65E-32 | -0.536 |
| cg13508949 | 4  | 166131313 | KLHL2       | 1st exon         | S_Shelf | 0.787±0.076 | 0.526±0.196 | 0.262 | 8.26E-05 | 6.66E-14 | -0.358 |
| cg20701461 | 1  | 45801852  | MUTYH       | 5'UTR            | N_Shelf | 0.466±0.136 | 0.205±0.078 | 0.262 | 6.55E-04 | 1.02E-09 | -0.295 |
| cg11617144 | 8  | 145729772 | GPT         | 1st exon         | N_Shore | 0.648±0.194 | 0.387±0.062 | 0.261 | 6.32E-03 | 2.41E-09 | -0.289 |
| cg00571819 | 9  | 133455886 | OC10027221; | TSS1500          | S_Shore | 0.465±0.147 | 0.203±0.071 | 0.261 | 1.16E-03 | 1.80E-05 | -0.210 |
| cg04255044 | 16 | 87415168  | FBXO31      | 5'UTR            | N_Shore | 0.458±0.14  | 0.197±0.065 | 0.261 | 8.63E-04 | 2.15E-15 | -0.377 |
| cg08662766 | 19 | 4536321   | PLIN5       | TSS1500          | S_Shore | 0.596±0.16  | 0.335±0.104 | 0.261 | 1.83E-03 | 3.43E-25 | -0.481 |
| cg25312054 | 13 | 110434467 | IRS2        | 1st exon         | Island  | 0.673±0.116 | 0.412±0.132 | 0.261 | 1.27E-04 | 5.17E-10 | -0.300 |
| cg16582986 | 6  | 160514231 | LOC729603   | 1st exon         | S_Shore | 0.755±0.1   | 0.494±0.175 | 0.261 | 8.73E-05 | 6.35E-09 | -0.281 |
| cg03010018 | 11 | 116708299 | APOA1       | 5'UTR/1st exon   | S_Shore | 0.559±0.172 | 0.299±0.074 | 0.261 | 3.20E-03 | 1.84E-06 | -0.232 |
| cg01486987 | 19 | 39443861  | FBXO17      | 5'UTR/1st intron | S_Shelf | 0.694±0.046 | 0.433±0.103 | 0.261 | 4.78E-09 | 3.50E-06 | -0.226 |
| cg13702181 | 14 | 77791657  | GSTZ1       | 5'UTR            | S_Shelf | 0.581±0.072 | 0.32±0.115  | 0.260 | 7.20E-07 | 2.51E-07 | -0.251 |
| cg12235622 | 1  | 43856473  | MED8        | TSS1500          | S_Shore | 0.591±0.112 | 0.331±0.118 | 0.260 | 9.78E-05 | 1.48E-08 | -0.274 |
| cg00204262 | 19 | 39323158  | ECH1        | TSS1500          | S_Shore | 0.461±0.134 | 0.201±0.06  | 0.260 | 7.01E-04 | 4.07E-09 | -0.285 |
| cg20985067 | 7  | 95026538  | PON3        | TSS1500          | S_Shore | 0.446±0.112 | 0.186±0.077 | 0.260 | 1.31E-04 | 1.45E-07 | -0.256 |
| cg03606098 | 1  | 1690840   | NADK        | TSS1500          | N_Shore | 0.627±0.146 | 0.367±0.124 | 0.259 | 9.66E-04 | 4.01E-22 | -0.452 |
| cg14016166 | 7  | 75543425  | POR         | TSS1500          | N_Shore | 0.757±0.122 | 0.498±0.145 | 0.259 | 2.39E-04 | 1.90E-10 | -0.307 |
| cg14719865 | 5  | 101834365 | SLCO6A1     | 1st exon         | Island  | 0.637±0.106 | 0.378±0.113 | 0.259 | 5.52E-05 | 2.76E-05 | -0.205 |
| cg25603883 | 1  | 154944357 | SHC1        | 5'UTR/1st intron | N_Shelf | 0.401±0.241 | 0.142±0.081 | 0.259 | 1.88E-02 | 9.95E-10 | -0.295 |
| cg03085549 | 16 | 75150819  | LDHD        | TSS200           | S_Shore | 0.429±0.123 | 0.171±0.062 | 0.259 | 3.64E-04 | 2.84E-10 | -0.304 |
| cg21733794 | 20 | 36154388  | BLCAP       | 5'UTR/1st intron | S_Shelf | 0.623±0.039 | 0.365±0.182 | 0.258 | 1.28E-05 | 4.28E-27 | -0.497 |
| cg24439334 | 1  | 2345374   | PEX10       | TSS1500          | S_Shore | 0.491±0.124 | 0.233±0.075 | 0.258 | 3.50E-04 | 4.30E-05 | -0.200 |
| cg08370787 | 5  | 148208041 | ADRB2       | 1st exon/3'UTR   | S_Shore | 0.44±0.145  | 0.182±0.077 | 0.258 | 1.14E-03 | 2.07E-11 | -0.322 |
| cg13719901 | 3  | 46608139  | LRRC2       | TSS200           | S_Shore | 0.408±0.127 | 0.15±0.07   | 0.258 | 4.50E-04 | 1.14E-09 | -0.294 |
| cg16452651 | 21 | 35016873  | ITSN1       | 5'UTR/1st intron | S_Shelf | 0.404±0.15  | 0.146±0.073 | 0.258 | 1.43E-03 | 4.36E-06 | -0.224 |
| cg03558769 | 2  | 242497595 | BOK         | TSS1500          | N_Shore | 0.554±0.14  | 0.296±0.085 | 0.258 | 8.30E-04 | 8.33E-07 | -0.240 |
| cg24051786 | 3  | 47514673  | SCAP        | 5'UTR/1st intron | N_Shelf | 0.652±0.135 | 0.394±0.131 | 0.258 | 5.46E-04 | 1.47E-11 | -0.325 |
| cg18671057 | 6  | 13489248  | GFOD1       | TSS1500          | S_Shore | 0.895±0.066 | 0.637±0.266 | 0.257 | 9.35E-04 | 3.63E-06 | -0.226 |
| cg13561372 | 7  | 121781778 | AASS        | 5'UTR/1st intron | N_Shelf | 0.635±0.084 | 0.378±0.166 | 0.257 | 2.53E-05 | 8.90E-23 | -0.458 |
| cg12369869 | 3  | 184035508 | EIF4G1      | 5'UTR            | S_Shelf | 0.554±0.163 | 0.297±0.107 | 0.257 | 2.34E-03 | 2.16E-06 | -0.231 |
| cg02930951 | 20 | 48806066  | CEBPB       | TSS1500          | N_Shore | 0.571±0.107 | 0.314±0.063 | 0.257 | 1.28E-04 | 1.39E-08 | -0.275 |
| cg14093103 | 1  | 61546214  | NFIA        | TSS1500          | N_Shelf | 0.585±0.148 | 0.329±0.162 | 0.257 | 1.26E-03 | 8.06E-10 | -0.297 |
| cg16267236 | 3  | 133464463 | TF          | 5'UTR            | N_Shore | 0.609±0.155 | 0.352±0.092 | 0.257 | 1.73E-03 | 8.18E-19 | -0.418 |
| cg01032398 | 19 | 45408121  | APOE        | TSS1500          | N_Shelf | 0.483±0.129 | 0.227±0.094 | 0.257 | 4.21E-04 | 8.65E-08 | -0.260 |
| cg04414860 | 6  | 116575894 | TSPYL4      | TSS1500          | S_Shore | 0.507±0.075 | 0.25±0.161  | 0.256 | 1.13E-05 | 6.58E-10 | -0.298 |
| cg13102658 | 1  | 2324224   | RER1        | 5'UTR/1st intron | S_Shore | 0.464±0.136 | 0.207±0.076 | 0.256 | 7.52E-04 | 8.10E-07 | -0.240 |
| cg14527389 | 7  | 41742993  | INHBA       | TSS1500          | N_Shelf | 0.789±0.09  | 0.533±0.19  | 0.256 | 9.71E-05 | 2.78E-05 | -0.205 |
| cg27140914 | 3  | 39095348  | WDR48       | 5'UTR/1st intron | S_Shore | 0.634±0.163 | 0.378±0.115 | 0.256 | 2.32E-03 | 1.02E-06 | -0.238 |
| cg19092837 | 1  | 10271724  | KIF1B       | 5'UTR/1st exon   | S_Shore | 0.441±0.164 | 0.185±0.076 | 0.256 | 2.63E-03 | 2.46E-10 | -0.305 |
| cg07531356 | 9  | 5185951   | INSL6       | TSS1500          | S_Shore | 0.689±0.08  | 0.434±0.176 | 0.256 | 3.42E-05 | 1.82E-10 | -0.307 |
| cg03009240 | 19 | 3507867   | FZR1        | 5'UTR/1st intron | S_Shore | 0.645±0.227 | 0.389±0.209 | 0.255 | 1.84E-02 | 2.68E-17 | -0.400 |
| cg16409259 | 11 | 68117110  | LRP5        | 5'UTR            | S_Shore | 0.59±0.194  | 0.334±0.131 | 0.255 | 6.98E-03 | 2.88E-08 | -0.269 |
| cg09238666 | 16 | 66584358  | TK2         | TSS1500          | N_Shore | 0.436±0.144 | 0.181±0.064 | 0.255 | 1.25E-03 | 5.96E-11 | -0.315 |
| cg12250062 | 2  | 128175068 | PROC        | TSS1500          | S_Shore | 0.773±0.103 | 0.518±0.176 | 0.255 | 1.32E-04 | 1.89E-09 | -0.290 |
| cg18735146 | 13 | 21140606  | IFT88       | TSS1500          | N_Shore | 0.435±0.127 | 0.18±0.07   | 0.255 | 4.97E-04 | 7.88E-08 | -0.261 |
| cg01089602 | 13 | 113760101 | F7          | 1st exon         | N_Shore | 0.453±0.128 | 0.198±0.073 | 0.254 | 5.15E-04 | 2.67E-15 | -0.376 |
| cg05338976 | 7  | 114561850 | MDFIC       | TSS1500          | N_Shore | 0.463±0.102 | 0.209±0.112 | 0.254 | 4.82E-05 | 6.66E-06 | -0.220 |

|             |    |           |             |                  |         |             |             |       |          |          |        |
|-------------|----|-----------|-------------|------------------|---------|-------------|-------------|-------|----------|----------|--------|
| cg10120856  | 4  | 157996959 | GLRB        | TSS1500          | N_Shore | 0.58±0.065  | 0.326±0.171 | 0.254 | 1.34E-05 | 2.76E-08 | -0.269 |
| cg16677647  | 16 | 67750395  | GFOD2       | 5'UTR/1st intron | N_Shelf | 0.56±0.148  | 0.306±0.082 | 0.254 | 1.41E-03 | 9.75E-22 | -0.448 |
| cg00470183  | 6  | 116575913 | TSPYL4      | TSS1500          | S_Shore | 0.448±0.087 | 0.195±0.154 | 0.253 | 2.36E-05 | 4.27E-08 | -0.266 |
| cg16787352  | 14 | 102975405 | ANKRD9      | 5'UTR/1st intron | Island  | 0.472±0.105 | 0.219±0.083 | 0.253 | 8.20E-05 | 2.43E-05 | -0.206 |
| cg07543138  | 21 | 16434067  | NRIP1       | 5'UTR/1st intron | N_Shelf | 0.495±0.199 | 0.242±0.132 | 0.253 | 8.28E-03 | 1.43E-05 | -0.212 |
| cg02593507  | 19 | 4535582   | PLIN5       | TSS1500          | S_Shore | 0.541±0.134 | 0.288±0.086 | 0.253 | 6.91E-04 | 4.99E-13 | -0.346 |
| cg17347634  | 8  | 65711916  | CYP7B1      | TSS1500          | S_Shore | 0.438±0.223 | 0.186±0.1   | 0.253 | 1.47E-02 | 9.12E-18 | -0.406 |
| cg03054529  | 7  | 30029938  | SCRN1       | TSS1500          | S_Shore | 0.703±0.092 | 0.45±0.2    | 0.253 | 1.90E-04 | 1.12E-05 | -0.215 |
| cg04354393  | 17 | 33775963  | SLFN13      | TSS200           | N_Shore | 0.438±0.136 | 0.186±0.095 | 0.253 | 7.26E-04 | 2.01E-05 | -0.208 |
| cg26141247  | 14 | 94644017  | PPP4R4      | 5'UTR            | S_Shelf | 0.738±0.045 | 0.485±0.205 | 0.252 | 7.09E-05 | 1.19E-26 | -0.493 |
| cg08030373  | 3  | 51574322  | RAD54L2     | 5'UTR            | S_Shore | 0.745±0.084 | 0.493±0.197 | 0.252 | 1.22E-04 | 8.21E-06 | -0.218 |
| cg08099331  | 16 | 11037187  | DEXI        | TSS1500          | S_Shore | 0.689±0.123 | 0.437±0.217 | 0.252 | 1.08E-03 | 7.92E-17 | -0.395 |
| cg08099331  | 16 | 11037187  | CLEC16A     | TSS1500          | S_Shore | 0.689±0.123 | 0.437±0.217 | 0.252 | 1.08E-03 | 6.60E-09 | -0.281 |
| cg12058064  | 15 | 86315201  | KLHL25      | 5'UTR/1st intron | S_Shelf | 0.508±0.122 | 0.256±0.135 | 0.252 | 2.98E-04 | 1.34E-09 | -0.293 |
| cg04839706  | 16 | 46920075  | GPT2        | 5'UTR            | S_Shore | 0.579±0.192 | 0.327±0.16  | 0.252 | 7.40E-03 | 1.59E-30 | -0.525 |
| cg24064639  | 17 | 66592243  | FAM20A      | 5'UTR/1st intron | N_Shelf | 0.505±0.164 | 0.253±0.113 | 0.251 | 2.70E-03 | 1.76E-10 | -0.308 |
| cg00969323  | 2  | 242627866 | DTYMK       | TSS1500          | S_Shore | 0.543±0.109 | 0.292±0.106 | 0.251 | 1.06E-04 | 3.71E-06 | -0.226 |
| cg03582736  | 1  | 95586852  | TMEM56      | 5'UTR/1st intron | S_Shelf | 0.669±0.113 | 0.418±0.149 | 0.251 | 1.77E-04 | 1.50E-26 | -0.492 |
| cg13788387  | 2  | 97652806  | FAM178B     | TSS1500          | S_Shore | 0.815±0.107 | 0.564±0.287 | 0.251 | 3.59E-03 | 1.96E-14 | -0.365 |
| cg23284609  | 5  | 10306947  | CMBL        | 5'UTR/1st intron | N_Shore | 0.556±0.126 | 0.305±0.106 | 0.250 | 3.96E-04 | 3.39E-39 | -0.585 |
| cg22082456  | 1  | 53392538  | SCP2        | TSS1500          | N_Shore | 0.465±0.141 | 0.215±0.085 | 0.250 | 1.06E-03 | 4.95E-13 | -0.346 |
| cg17547295  | 5  | 157282503 | CLINT1      | 5'UTR/1st intron | N_Shelf | 0.416±0.154 | 0.166±0.068 | 0.250 | 2.09E-03 | 8.44E-06 | -0.217 |
| cg02898499  | 16 | 1831468   | NUBP2       | TSS1500          | N_Shore | 0.618±0.058 | 0.368±0.129 | 0.250 | 4.77E-07 | 6.20E-09 | -0.281 |
| cg11777420  | 2  | 120769933 | EPB41L5     | TSS1500          | N_Shore | 0.459±0.125 | 0.21±0.079  | 0.250 | 4.56E-04 | 1.34E-09 | -0.293 |
| cg00884805  | 1  | 68296607  | GNG12       | 5'UTR/1st intron | N_Shore | 0.536±0.159 | 0.287±0.121 | 0.250 | 2.28E-03 | 6.33E-13 | -0.345 |
| cg14510299  | 1  | 27928494  | AHDC1       | 5'UTR/1st intron | N_Shore | 0.394±0.186 | 0.144±0.164 | 0.250 | 6.58E-03 | 2.01E-05 | -0.208 |
| cg18550003  | 19 | 49259284  | FGF21       | 5'UTR            | S_Shelf | 0.552±0.117 | 0.302±0.116 | 0.250 | 2.13E-04 | 9.86E-10 | -0.295 |
| cg19554037  | 11 | 1318877   | TOLLIP      | 5'UTR/1st intron | S_Shore | 0.65±0.165  | 0.4±0.075   | 0.250 | 3.24E-03 | 8.99E-14 | -0.356 |
| cg06520369  | 5  | 139938342 | SRA1        | TSS1500          | S_Shore | 0.823±0.042 | 0.573±0.206 | 0.250 | 8.45E-05 | 2.35E-08 | -0.271 |
| cg15824543  | 1  | 1695391   | NADK        | 5'UTR            | S_Shelf | 0.716±0.139 | 0.467±0.154 | 0.249 | 1.02E-03 | 2.47E-14 | -0.364 |
| cg22472290  | 19 | 52391480  | ZNF577      | TSS1500          | S_Shore | 0.567±0.175 | 0.318±0.132 | 0.249 | 4.28E-03 | 3.47E-27 | -0.498 |
| cg14961476  | 1  | 9130738   | SLC2A5      | 5'UTR/1st intron | N_Shore | 0.526±0.141 | 0.277±0.135 | 0.249 | 1.03E-03 | 1.47E-06 | -0.235 |
| cg04305808  | 7  | 99614209  | ZKSCAN1     | 5'UTR/1st intron | S_Shore | 0.403±0.111 | 0.154±0.077 | 0.249 | 1.78E-04 | 2.13E-07 | -0.252 |
| cg18880500  | 1  | 53392492  | SCP2        | TSS1500          | N_Shore | 0.45±0.136  | 0.201±0.079 | 0.249 | 8.94E-04 | 7.26E-13 | -0.344 |
| cg24269657  | 13 | 113759771 | F7          | TSS1500          | N_Shore | 0.466±0.129 | 0.217±0.07  | 0.248 | 6.58E-04 | 5.77E-16 | -0.385 |
| cg18038894  | 17 | 48506385  | ACSF2       | 5'UTR/1st intron | S_Shelf | 0.544±0.12  | 0.296±0.071 | 0.248 | 3.70E-04 | 7.33E-10 | -0.297 |
| cg03464896  | 3  | 170744964 | SLC2A2      | TSS200           | N_Shore | 0.521±0.078 | 0.273±0.068 | 0.248 | 5.13E-06 | 5.20E-31 | -0.528 |
| cg12421282  | 1  | 41158986  | NFYC        | 5'UTR/1st intron | S_Shore | 0.547±0.133 | 0.299±0.095 | 0.248 | 6.80E-04 | 1.02E-10 | -0.311 |
| cg26398586  | 5  | 101834472 | SLC06A1     | 1st exon         | Island  | 0.794±0.095 | 0.546±0.186 | 0.248 | 1.63E-04 | 4.88E-12 | -0.332 |
| cg06098215  | 10 | 51575702  | NCOA4       | 5'UTR/1st intron | S_Shelf | 0.371±0.114 | 0.123±0.068 | 0.248 | 2.63E-04 | 1.69E-06 | -0.233 |
| cg16324018  | 2  | 85580627  | ELMOD3      | TSS1500          | N_Shore | 0.478±0.14  | 0.23±0.081  | 0.247 | 1.14E-03 | 6.51E-08 | -0.262 |
| cg080606497 | 8  | 28244769  | ZNF395      | TSS1500          | S_Shore | 0.431±0.097 | 0.184±0.062 | 0.247 | 7.03E-05 | 8.09E-13 | -0.343 |
| cg12433575  | 6  | 30881464  | VARS2       | TSS1500          | N_Shore | 0.443±0.134 | 0.195±0.067 | 0.247 | 8.92E-04 | 3.71E-10 | -0.302 |
| cg26025557  | 3  | 42842344  | HIGD1A      | 5'UTR/1st intron | N_Shelf | 0.792±0.059 | 0.545±0.187 | 0.247 | 4.33E-05 | 2.58E-30 | -0.523 |
| cg02102684  | 16 | 4421445   | VASN        | TSS1500          | N_Shore | 0.455±0.124 | 0.208±0.055 | 0.247 | 5.92E-04 | 3.14E-05 | -0.204 |
| cg11143063  | 2  | 128177475 | PROC        | 5'UTR/1st intron | N_Shelf | 0.528±0.139 | 0.281±0.068 | 0.247 | 1.15E-03 | 1.72E-20 | -0.435 |
| cg25103337  | 1  | 9293583   | HGPD        | TSS1500          | N_Shore | 0.366±0.169 | 0.12±0.058  | 0.247 | 4.07E-03 | 2.33E-13 | -0.351 |
| cg01026796  | 5  | 54602543  | DHX29       | 5'UTR/1st intron | N_Shore | 0.412±0.124 | 0.165±0.063 | 0.247 | 5.30E-04 | 1.13E-06 | -0.237 |
| cg14533644  | 9  | 133453231 | OC10027221; | 1st exon         | N_Shore | 0.792±0.065 | 0.546±0.233 | 0.246 | 4.38E-04 | 3.35E-06 | -0.227 |
| cg14172428  | 9  | 71787160  | TJP2        | 5'UTR            | N_Shore | 0.587±0.134 | 0.341±0.148 | 0.246 | 8.33E-04 | 2.00E-07 | -0.253 |
| cg20932822  | 3  | 32279236  | CMTM8       | TSS1500          | N_Shore | 0.451±0.127 | 0.206±0.067 | 0.246 | 6.31E-04 | 9.78E-24 | -0.467 |
| cg07958192  | 4  | 90033974  | TIGD2       | 5'UTR/1st exon   | S_Shore | 0.584±0.143 | 0.338±0.223 | 0.246 | 2.93E-03 | 4.26E-51 | -0.651 |
| cg02747210  | 13 | 113776917 | F10         | TSS200           | S_Shelf | 0.532±0.156 | 0.286±0.089 | 0.246 | 2.37E-03 | 4.15E-08 | -0.266 |
| cg00912573  | 2  | 227661291 | IRS1        | 1st exon         | N_Shore | 0.501±0.13  | 0.255±0.084 | 0.246 | 6.74E-04 | 6.25E-17 | -0.396 |
| cg12377368  | 11 | 18128126  | SAAL1       | TSS1500          | S_Shore | 0.548±0.059 | 0.302±0.169 | 0.245 | 1.46E-05 | 4.18E-07 | -0.246 |
| cg01455981  | 1  | 20511095  | UBXN10      | TSS1500          | N_Shore | 0.588±0.112 | 0.343±0.132 | 0.245 | 1.83E-04 | 4.60E-25 | -0.479 |
| cg04980849  | 15 | 45671347  | GATM        | 5'UTR            | S_Shore | 0.503±0.114 | 0.258±0.163 | 0.245 | 3.12E-04 | 1.91E-06 | -0.232 |
| cg08884029  | 12 | 110012500 | MVK         | 5'UTR/1st intron | S_Shore | 0.604±0.189 | 0.359±0.143 | 0.245 | 7.56E-03 | 7.07E-18 | -0.407 |
| cg08884029  | 12 | 110012500 | MMAB        | TSS1500          | S_Shore | 0.604±0.189 | 0.359±0.143 | 0.245 | 7.56E-03 | 8.54E-10 | -0.296 |
| cg01066936  | 22 | 41776843  | TEF         | TSS1500          | N_Shore | 0.531±0.152 | 0.286±0.101 | 0.245 | 2.02E-03 | 2.98E-14 | -0.363 |
| cg13615367  | 3  | 58479231  | KCTD6       | 5'UTR/1st intron | S_Shore | 0.508±0.147 | 0.263±0.091 | 0.245 | 1.60E-03 | 6.92E-27 | -0.495 |
| cg12016746  | 11 | 68084453  | LRP5        | 5'UTR/1st intron | S_Shelf | 0.391±0.16  | 0.146±0.064 | 0.245 | 3.00E-03 | 4.24E-05 | -0.200 |
| cg08012294  | 8  | 11723816  | CTSB        | 5'UTR/1st intron | N_Shore | 0.476±0.122 | 0.231±0.078 | 0.245 | 4.29E-04 | 5.08E-06 | -0.223 |
| cg13443575  | 17 | 33775961  | SLFN13      | TSS200           | N_Shore | 0.513±0.125 | 0.268±0.154 | 0.245 | 5.29E-04 | 5.75E-07 | -0.243 |
| cg18495047  | 22 | 24891166  | UPB1        | TSS200           | Island  | 0.521±0.119 | 0.277±0.072 | 0.245 | 3.94E-04 | 2.86E-14 | -0.363 |
| cg12616941  | 10 | 22612797  | BMI1        | 5'UTR/1st intron | N_Shore | 0.711±0.163 | 0.466±0.208 | 0.245 | 4.89E-03 | 8.77E-13 | -0.343 |
| cg17564844  | 22 | 23413784  | GNAZ        | 5'UTR/1st intron | S_Shore | 0.481±0.149 | 0.237±0.065 | 0.245 | 2.01E-03 | 1.39E-06 | -0.235 |
| cg18092474  | 15 | 75019302  | CYP1A1      | TSS1500          | Island  | 0.409±0.171 | 0.164±0.074 | 0.244 | 4.40E-03 | 2.60E-06 | -0.229 |
| cg06527213  | 15 | 86315211  | KLHL25      | 5'UTR/1st intron | S_Shelf | 0.532±0.132 | 0.288±0.151 | 0.244 | 8.05E-04 | 8.49E-10 | -0.296 |
| cg08696640  | 6  | 41531327  | FOXP4       | 5'UTR/1st intron | S_Shelf | 0.478±0.12  | 0.233±0.067 | 0.244 | 4.35E-04 | 2.65E-12 | -0.336 |
| cg03537537  | 8  | 88886262  | DCAF4L2     | 5'UTR/1st exon   | Island  | 0.677±0.207 | 0.433±0.262 | 0.244 | 2.08E-02 | 1.51E-31 | -0.532 |
| cg03668539  | 19 | 7553324   | PEX11G      | 5'UTR/1st intron | N_Shore | 0.515±0.142 | 0.271±0.092 | 0.244 | 1.30E-03 | 4.83E-11 | -0.317 |
| cg06374748  | 17 | 52978856  | TOM1L1      | 5'UTR/1st intron | S_Shore | 0.47±0.133  | 0.226±0.07  | 0.244 | 9.12E-04 | 3.86E-17 | -0.399 |
| cg10580282  | 3  | 50340564  | HYAL1       | 1st exon         | S_Shelf | 0.499±0.113 | 0.255±0.08  | 0.244 | 2.38E-04 | 2.84E-07 | -0.250 |
| cg27126059  | 22 | 24891338  | UPB1        | 5'UTR/1st exon   | Island  | 0.552±0.138 | 0.308±0.073 | 0.244 | 1.20E-03 | 1.87E-27 | -0.500 |
| cg01915822  | 8  | 145596918 | ADCK5       | TSS1500          | N_Shore | 0.502±0.164 | 0.258±0.07  | 0.243 | 3.59E-03 | 8.22E-14 | -0.357 |
| cg03837313  | 11 | 57195350  | SLC43A3     | TSS1500          | S_Shore | 0.568±0.158 | 0.326±0.217 | 0.243 | 4.83E-03 | 3.25E-13 | -0.349 |
| cg26511386  | 7  | 142982262 | TMEM139     | 1st exon         | N_Shelf | 0.538±0.174 | 0.295±0.146 | 0.243 | 5.09E-03 | 1.28E-30 | -0.525 |
| cg01800148  | 1  | 9130886   | SLC2A5      | 5'UTR/1st intron | N_Shore | 0.602±0.111 | 0.36±0.211  | 0.242 | 8.78E-04 | 2.17E-09 | -0.289 |
| cg10835823  | 5  | 169659763 | C5orf58     | TSS1500          | N_Shore | 0.771±0.106 | 0.529±0.21  | 0.242 | 7.06E-04 | 1.49E-18 | -0.415 |
| cg02872476  | 16 | 90086806  | DBNDD1      | TSS1500          | S_Shore | 0.623±0.13  | 0.381±0.115 | 0.242 | 6.59E-04 | 6.18E-30 | -0.520 |
| cg10806586  | 14 | 45366116  | C14orf28    | TSS1500          | N_Shore | 0.441±0.087 | 0.199±0.078 | 0.242 | 1.75E-05 | 1.13E-05 | -0.214 |
| cg04428805  | 17 | 65239522  | HELZ        | 5'UTR            | N_Shore | 0.558±0.123 | 0.316±0.134 | 0.242 | 4.53E-04 | 1.38E-09 | -0.293 |
| cg03533472  | 16 | 46919112  | GPT2        | 5'UTR/1st exon   | S_Shore | 0.345±0.152 | 0.103±0.048 | 0.242 | 2.53E-03 | 1.55E-12 | -0.339 |
| cg25742458  | 19 | 18081620  | KCNN1       | 5'UTR            | N_Shelf | 0.845±0.069 | 0.603±0.226 | 0.241 | 4.42E-04 | 2.34E-05 | -0.207 |
| cg22531018  | 7  | 142981779 | TMEM139     | TSS1500          | N_Shelf | 0.547±0.143 | 0.306±0.092 | 0.241 | 1.49E-03 | 1.30E-18 | -0.415 |
| cg06711560  | 9  | 139746365 | MAMDC4      | TSS1500          | S_Shore | 0.575±0.121 |             |       |          |          |        |

|            |    |           |           |                  |         |             |             |       |          |          |        |
|------------|----|-----------|-----------|------------------|---------|-------------|-------------|-------|----------|----------|--------|
| cg06801028 | 10 | 51575592  | NCOA4     | 5'UTR/1st intron | S_Shelf | 0.379±0.1   | 0.138±0.055 | 0.241 | 1.32E-04 | 3.97E-06 | -0.225 |
| cg05677630 | 22 | 22020012  | PPIL2     | TSS1500          | N_Shore | 0.579±0.096 | 0.338±0.089 | 0.241 | 4.99E-05 | 3.02E-10 | -0.304 |
| cg18252102 | 13 | 98796790  | FARP1     | 5'UTR/1st intron | S_Shore | 0.495±0.129 | 0.254±0.067 | 0.241 | 8.30E-04 | 6.35E-12 | -0.330 |
| cg05920345 | 6  | 44282149  | AARS2     | TSS1500          | S_Shore | 0.762±0.09  | 0.522±0.145 | 0.241 | 4.03E-05 | 1.17E-05 | -0.214 |
| cg21897315 | 3  | 81811448  | GBE1      | TSS1500          | S_Shore | 0.637±0.168 | 0.396±0.162 | 0.241 | 4.72E-03 | 1.20E-10 | -0.310 |
| cg03412763 | 11 | 125771358 | PUS3      | 5'UTR/1st intron | N_Shelf | 0.698±0.069 | 0.457±0.211 | 0.240 | 2.47E-04 | 7.75E-11 | -0.313 |
| cg04749433 | 14 | 58862246  | TOMM20L   | TSS1500          | N_Shore | 0.515±0.108 | 0.275±0.078 | 0.240 | 1.86E-04 | 1.19E-07 | -0.257 |
| cg11208165 | 3  | 16308357  | OXNAD1    | 5'UTR/1st intron | S_Shore | 0.506±0.158 | 0.266±0.092 | 0.240 | 2.93E-03 | 3.42E-34 | -0.552 |
| cg22747501 | 7  | 29233476  | CHN2      | TSS1500          | N_Shore | 0.373±0.12  | 0.133±0.047 | 0.240 | 6.11E-04 | 5.50E-23 | -0.460 |
| cg21771682 | 3  | 11036537  | SLC6A1    | 5'UTR/1st intron | S_Shore | 0.501±0.181 | 0.262±0.102 | 0.240 | 6.58E-03 | 3.37E-25 | -0.483 |
| cg17334359 | 5  | 162929830 | MAT2B     | TSS1500          | N_Shelf | 0.574±0.106 | 0.335±0.204 | 0.239 | 6.75E-04 | 1.44E-05 | -0.212 |
| cg06613263 | 5  | 142779552 | NR3C1     | 5'UTR            | N_Shelf | 0.37±0.049  | 0.131±0.058 | 0.239 | 8.29E-09 | 2.03E-10 | -0.307 |
| cg20029153 | 17 | 27505257  | MYO18A    | 5'UTR/1st intron | S_Shore | 0.421±0.136 | 0.182±0.069 | 0.239 | 1.26E-03 | 1.61E-05 | -0.211 |
| cg22332066 | 1  | 210501621 | HHAT      | 5'UTR/1st exon   | N_Shore | 0.55±0.178  | 0.311±0.139 | 0.239 | 6.23E-03 | 2.55E-09 | -0.288 |
| cg05311626 | 11 | 1320114   | TOLLIP    | 5'UTR/1st intron | S_Shelf | 0.668±0.067 | 0.429±0.109 | 0.239 | 9.06E-07 | 5.25E-18 | -0.409 |
| cg12210543 | 19 | 12175107  | ZNF844    | TSS1500          | N_Shore | 0.491±0.14  | 0.252±0.188 | 0.239 | 2.07E-03 | 1.38E-14 | -0.367 |
| cg11700490 | 7  | 95026937  | PON3      | TSS1500          | S_Shore | 0.421±0.131 | 0.182±0.069 | 0.238 | 9.79E-04 | 2.53E-08 | -0.270 |
| cg21932672 | 1  | 95584445  | TMEM56    | 5'UTR/1st intron | S_Shore | 0.417±0.144 | 0.179±0.053 | 0.238 | 2.02E-03 | 1.64E-25 | -0.483 |
| cg24334259 | 3  | 138311416 | CEP70     | 5'UTR/1st intron | N_Shore | 0.684±0.141 | 0.446±0.13  | 0.238 | 1.45E-03 | 4.88E-07 | -0.245 |
| cg00653041 | 7  | 122524465 | CADPS2    | 5'UTR            | N_Shore | 0.649±0.167 | 0.412±0.172 | 0.238 | 5.11E-03 | 7.28E-09 | -0.280 |
| cg00354381 | 11 | 57195187  | SLC43A3   | TSS1500          | S_Shore | 0.513±0.179 | 0.276±0.158 | 0.238 | 7.04E-03 | 2.28E-12 | -0.337 |
| cg23165541 | 15 | 64338164  | DAPK2     | 5'UTR/1st intron | Island  | 0.469±0.086 | 0.231±0.086 | 0.238 | 1.77E-05 | 3.05E-11 | -0.320 |
| cg06047020 | 13 | 93877835  | GPC6      | TSS1500          | N_Shore | 0.434±0.137 | 0.197±0.085 | 0.237 | 1.28E-03 | 4.84E-06 | -0.223 |
| cg05423018 | 7  | 36193854  | EEPD1     | 5'UTR            | S_Shore | 0.437±0.108 | 0.2±0.061   | 0.237 | 2.62E-04 | 8.57E-13 | -0.343 |
| cg26705561 | 10 | 102279791 | SEC31B    | TSS200           | S_Shore | 0.553±0.111 | 0.317±0.158 | 0.236 | 3.27E-04 | 4.15E-06 | -0.225 |
| cg13615983 | 9  | 139746152 | MAMDC4    | TSS1500          | S_Shore | 0.668±0.075 | 0.432±0.176 | 0.236 | 7.03E-05 | 1.06E-15 | -0.381 |
| cg06412323 | 20 | 43108009  | TPPAL     | 5'UTR            | S_Shelf | 0.531±0.101 | 0.296±0.17  | 0.236 | 2.43E-04 | 2.73E-25 | -0.481 |
| cg08616234 | 15 | 86313973  | KLHL25    | 5'UTR/1st intron | S_Shore | 0.668±0.111 | 0.433±0.153 | 0.236 | 3.14E-04 | 5.55E-12 | -0.331 |
| cg13046608 | 11 | 57195382  | SLC43A3   | TSS1500          | S_Shore | 0.58±0.156  | 0.344±0.231 | 0.236 | 6.47E-03 | 2.16E-14 | -0.365 |
| cg26124860 | 3  | 42918681  | CYP8B1    | TSS1500          | N_Shelf | 0.632±0.182 | 0.397±0.197 | 0.235 | 9.88E-03 | 1.35E-24 | -0.475 |
| cg08537660 | 11 | 12699661  | TEAD1     | 5'UTR            | S_Shelf | 0.528±0.12  | 0.292±0.156 | 0.235 | 5.92E-04 | 2.40E-06 | -0.230 |
| cg18205787 | 11 | 915239    | CHID1     | TSS200           | S_Shelf | 0.617±0.095 | 0.382±0.217 | 0.235 | 8.03E-04 | 3.75E-10 | -0.302 |
| cg01052512 | 16 | 2098739   | TSC2      | 5'UTR            | S_Shore | 0.415±0.127 | 0.179±0.052 | 0.235 | 9.39E-04 | 1.10E-13 | -0.355 |
| cg01052512 | 16 | 2098739   | NTHL1     | TSS1500          | S_Shore | 0.415±0.127 | 0.179±0.052 | 0.235 | 9.39E-04 | 5.78E-09 | -0.282 |
| cg20701556 | 1  | 95698924  | RWDD3     | TSS1500          | N_Shore | 0.412±0.129 | 0.177±0.079 | 0.235 | 9.15E-04 | 1.08E-06 | -0.237 |
| cg06791446 | 10 | 123355268 | FGFR2     | 5'UTR/1st intron | N_Shore | 0.484±0.11  | 0.249±0.096 | 0.235 | 2.09E-04 | 3.34E-07 | -0.248 |
| cg07730946 | 4  | 185743727 | ACSL1     | 5'UTR/1st intron | N_Shelf | 0.666±0.07  | 0.431±0.155 | 0.235 | 1.92E-05 | 8.44E-25 | -0.477 |
| cg17703554 | 8  | 88886339  | DCAF4L2   | TSS200           | Island  | 0.52±0.106  | 0.285±0.105 | 0.235 | 1.55E-04 | 1.55E-16 | -0.391 |
| cg21339084 | 2  | 128422433 | LIMS2     | 5'UTR/1st intron | S_Shore | 0.487±0.108 | 0.252±0.08  | 0.235 | 2.06E-04 | 5.09E-07 | -0.244 |
| cg26697065 | 16 | 30456379  | SEPHS2    | 1st exon         | N_Shore | 0.5±0.148   | 0.265±0.064 | 0.234 | 2.44E-03 | 3.11E-13 | -0.349 |
| cg20081724 | 7  | 102787173 | NAPEPLD   | 5'UTR/1st intron | N_Shelf | 0.577±0.149 | 0.342±0.21  | 0.234 | 4.25E-03 | 1.11E-06 | -0.237 |
| cg02614016 | 10 | 89263900  | MINPP1    | TSS1500          | N_Shore | 0.614±0.136 | 0.379±0.146 | 0.234 | 1.36E-03 | 4.56E-10 | -0.301 |
| cg06135495 | 18 | 47338985  | SCARNA17  | TSS1500          | N_Shore | 0.518±0.131 | 0.283±0.062 | 0.234 | 1.16E-03 | 1.98E-07 | -0.253 |
| cg19987060 | 6  | 52530180  | LOC730101 | 1st exon         | S_Shore | 0.47±0.121  | 0.236±0.076 | 0.234 | 5.74E-04 | 4.70E-18 | -0.409 |
| cg05654329 | 5  | 177581506 | NHP2      | TSS1500          | S_Shore | 0.521±0.141 | 0.287±0.105 | 0.234 | 1.58E-03 | 6.61E-08 | -0.262 |
| cg14283647 | 2  | 227662014 | IRS1      | 1st exon         | N_Shore | 0.518±0.129 | 0.284±0.078 | 0.234 | 9.51E-04 | 6.94E-09 | -0.280 |
| cg01205165 | 1  | 204119766 | ETNK2     | 5'UTR/1st intron | N_Shore | 0.454±0.072 | 0.221±0.085 | 0.234 | 2.27E-06 | 7.08E-37 | -0.570 |
| cg27506210 | 22 | 32150725  | DEPDC5    | 5'UTR/1st intron | S_Shore | 0.398±0.119 | 0.165±0.063 | 0.233 | 5.89E-04 | 2.26E-12 | -0.337 |
| cg07251788 | 22 | 19280165  | CLTCL1    | TSS1500          | S_Shore | 0.528±0.158 | 0.294±0.084 | 0.233 | 3.60E-03 | 1.94E-08 | -0.272 |
| cg03893872 | 1  | 210501634 | HHAT      | 5'UTR/1st exon   | N_Shore | 0.559±0.194 | 0.326±0.137 | 0.233 | 1.13E-02 | 8.49E-09 | -0.279 |
| cg16432031 | 1  | 12674914  | DHRS3     | 5'UTR/1st intron | N_Shelf | 0.468±0.135 | 0.234±0.061 | 0.233 | 1.43E-03 | 6.84E-12 | -0.330 |
| cg21238609 | 17 | 38472961  | RARA      | 5'UTR/1st intron | Island  | 0.417±0.11  | 0.184±0.085 | 0.233 | 2.43E-04 | 1.33E-08 | -0.275 |
| cg16580728 | 8  | 109800338 | TMEM74    | TSS1500          | S_Shore | 0.817±0.062 | 0.584±0.201 | 0.233 | 1.83E-04 | 1.45E-08 | -0.275 |
| cg06126593 | 16 | 20910405  | LYRM1     | TSS1500          | N_Shore | 0.513±0.105 | 0.281±0.133 | 0.233 | 1.66E-04 | 4.93E-06 | -0.223 |
| cg06126593 | 16 | 20910405  | DCUN1D3   | 5'UTR/1st intron | N_Shore | 0.513±0.105 | 0.281±0.133 | 0.233 | 1.66E-04 | 6.25E-06 | -0.220 |
| cg20329620 | 13 | 113759894 | F7        | TSS1500          | N_Shore | 0.5±0.118   | 0.267±0.067 | 0.233 | 5.54E-04 | 1.16E-18 | -0.416 |
| cg00287477 | 4  | 185721584 | ACSL1     | 5'UTR            | N_Shelf | 0.515±0.07  | 0.282±0.153 | 0.233 | 1.88E-05 | 2.68E-20 | -0.433 |
| cg00287477 | 4  | 185721584 | SLED1     | TSS1500          | N_Shelf | 0.515±0.07  | 0.282±0.153 | 0.233 | 1.88E-05 | 2.77E-08 | -0.269 |
| cg16814786 | 10 | 51575763  | NCOA4     | 5'UTR/1st intron | S_Shelf | 0.411±0.14  | 0.178±0.098 | 0.233 | 1.60E-03 | 4.47E-07 | -0.246 |
| cg01987333 | 2  | 242750561 | NEU4      | 5'UTR/1st intron | N_Shelf | 0.515±0.133 | 0.282±0.075 | 0.232 | 1.22E-03 | 8.31E-11 | -0.313 |
| cg11915001 | 19 | 12175268  | ZNF844    | TSS1500          | N_Shore | 0.516±0.133 | 0.283±0.113 | 0.232 | 1.07E-03 | 5.04E-24 | -0.471 |
| cg21472642 | 7  | 29233468  | CHN2      | TSS1500          | N_Shore | 0.396±0.132 | 0.164±0.056 | 0.232 | 1.34E-03 | 1.51E-26 | -0.492 |
| cg10201616 | 19 | 11198556  | LDLR      | TSS1500          | N_Shelf | 0.796±0.071 | 0.563±0.234 | 0.232 | 8.76E-04 | 5.25E-06 | -0.222 |
| cg25051805 | 7  | 23637943  | CCDC126   | 5'UTR            | S_Shore | 0.414±0.115 | 0.182±0.064 | 0.232 | 4.58E-04 | 1.39E-08 | -0.275 |
| cg17326451 | 7  | 86975534  | CROT      | 5'UTR/1st intron | S_Shore | 0.396±0.12  | 0.164±0.065 | 0.232 | 6.18E-04 | 5.10E-06 | -0.223 |
| cg17901584 | 1  | 55353706  | DHCR24    | TSS1500          | S_Shore | 0.4±0.102   | 0.168±0.066 | 0.232 | 1.69E-04 | 3.01E-07 | -0.249 |
| cg18712919 | 2  | 28112170  | RBKS      | 5'UTR/1st intron | N_Shore | 0.752±0.075 | 0.521±0.165 | 0.231 | 5.24E-05 | 1.08E-10 | -0.311 |
| cg07785936 | 2  | 133174635 | GPR39     | 1st exon         | N_Shore | 0.487±0.124 | 0.255±0.066 | 0.231 | 8.26E-04 | 3.18E-11 | -0.319 |
| cg27567495 | 3  | 53877436  | CHDH      | 5'UTR/1st intron | N_Shelf | 0.546±0.149 | 0.315±0.089 | 0.231 | 2.56E-03 | 8.26E-12 | -0.328 |
| cg06212760 | 1  | 46664937  | POMGNT1   | 5'UTR/1st intron | N_Shelf | 0.64±0.162  | 0.408±0.11  | 0.231 | 4.32E-03 | 5.49E-10 | -0.300 |
| cg06493930 | 11 | 22689814  | GAS2      | 5'UTR/1st exon   | S_Shore | 0.51±0.147  | 0.278±0.111 | 0.231 | 2.33E-03 | 1.50E-21 | -0.446 |
| cg25052156 | 10 | 123355454 | FGFR2     | 5'UTR/1st intron | N_Shore | 0.605±0.169 | 0.374±0.179 | 0.231 | 6.89E-03 | 1.36E-17 | -0.404 |
| cg02019444 | 21 | 35016787  | ITSN1     | 5'UTR/1st intron | S_Shelf | 0.337±0.144 | 0.106±0.06  | 0.231 | 2.26E-03 | 2.46E-06 | -0.230 |
| cg03284308 | 16 | 81039325  | CENPN     | TSS1500          | N_Shore | 0.441±0.153 | 0.21±0.149  | 0.231 | 3.31E-03 | 1.34E-06 | -0.235 |
| cg11677744 | 2  | 235863589 | SH3BP4    | 5'UTR/1st intron | S_Shore | 0.522±0.087 | 0.291±0.133 | 0.231 | 3.88E-05 | 7.76E-23 | -0.459 |
| cg05424060 | 7  | 79768675  | GNAI1     | 5'UTR/1st intron | S_Shelf | 0.377±0.124 | 0.146±0.071 | 0.231 | 7.87E-04 | 3.96E-10 | -0.302 |
| cg15597984 | 22 | 42527061  | CYP2D6    | TSS1500          | S_Shore | 0.452±0.084 | 0.221±0.066 | 0.231 | 2.48E-05 | 1.17E-05 | -0.214 |
| cg00423871 | 19 | 4827986   | TICAM1    | 5'UTR/1st intron | N_Shelf | 0.519±0.133 | 0.288±0.097 | 0.231 | 1.16E-03 | 2.16E-07 | -0.252 |
| cg00982641 | 5  | 169659845 | Csorf58   | TSS200           | Island  | 0.636±0.152 | 0.406±0.215 | 0.231 | 5.73E-03 | 3.31E-12 | -0.334 |
| cg09378425 | 7  | 150067896 | REPIN1    | 5'UTR            | S_Shore | 0.54±0.182  | 0.31±0.181  | 0.231 | 1.02E-02 | 4.83E-08 | -0.265 |
| cg16689434 | 16 | 90089547  | GAS8      | 5'UTR/1st intron | S_Shelf | 0.469±0.141 | 0.239±0.105 | 0.230 | 1.80E-03 | 3.48E-08 | -0.268 |
| cg25671484 | 6  | 42927993  | GNMT      | TSS1500          | N_Shore | 0.444±0.106 | 0.214±0.077 | 0.230 | 2.18E-04 | 1.62E-05 | -0.211 |
| cg23202388 | 11 | 914849    | CHID1     | 5'UTR/1st exon   | S_Shelf | 0.511±0.097 | 0.281±0.179 | 0.230 | 3.22E-04 | 2.65E-08 | -0.270 |
| cg27247252 | 8  | 67975895  | COPS5     | TSS1500          | N_Shore | 0.49±0.116  | 0.26±0.128  | 0.230 | 4.28E-04 | 3.60E-09 | -0.286 |
| cg20497704 | 18 | 43913147  | RNF165    | TSS1500          | N_Shore | 0.489±0.082 | 0.259±0.104 | 0.230 | 1.29E-05 | 8.40E-21 | -0.439 |
| cg06293365 | 7  | 75624427  | TMEM120A  | TSS1500          | S_Shore | 0.467±0.138 | 0.238±0.08  | 0.230 | 1.71E-03 | 6.95E-12 | -0.329 |
| cg06980173 | 1  | 154376344 | IL6R      | TSS1500          | N_Shore | 0.629±0.059 |             |       |          |          |        |

|            |    |           |            |                  |         |             |             |       |          |          |        |
|------------|----|-----------|------------|------------------|---------|-------------|-------------|-------|----------|----------|--------|
| cg06417125 | 5  | 169659847 | C5orf58    | TSS200           | Island  | 0.681±0.108 | 0.451±0.19  | 0.230 | 7.63E-04 | 2.99E-11 | -0.320 |
| cg26975524 | 8  | 1713012   | CLN8       | 5'UTR/1st intron | S_Shore | 0.356±0.093 | 0.127±0.046 | 0.230 | 1.18E-04 | 2.60E-08 | -0.270 |
| cg06219660 | 1  | 1695509   | NADK       | 5'UTR            | S_Shelf | 0.629±0.064 | 0.4±0.097   | 0.229 | 6.31E-07 | 5.94E-07 | -0.243 |
| cg01262667 | 19 | 19385393  | TM6SF2     | TSS1500          | S_Shore | 0.69±0.096  | 0.46±0.194  | 0.229 | 5.02E-04 | 3.20E-15 | -0.375 |
| cg11211951 | 8  | 145729740 | GPT        | 1st exon         | N_Shore | 0.657±0.139 | 0.429±0.084 | 0.229 | 1.76E-03 | 1.09E-11 | -0.326 |
| cg13981319 | 19 | 10466556  | ICAM3      | 5'UTR            | S_Shore | 0.697±0.169 | 0.468±0.153 | 0.229 | 6.46E-03 | 7.41E-08 | -0.261 |
| cg20353653 | 15 | 85143219  | ZSCAN2     | TSS1500          | N_Shore | 0.486±0.142 | 0.258±0.078 | 0.229 | 2.15E-03 | 1.20E-11 | -0.326 |
| cg00330789 | 8  | 99306953  | NIPAL2     | TSS1500          | S_Shore | 0.496±0.173 | 0.267±0.12  | 0.229 | 6.67E-03 | 6.07E-07 | -0.243 |
| cg23824183 | 8  | 124285055 | ZHX1       | 5'UTR/1st intron | N_Shore | 0.397±0.132 | 0.168±0.069 | 0.228 | 1.38E-03 | 8.68E-10 | -0.296 |
| cg00154455 | 8  | 146023573 | ZNF517     | TSS1500          | N_Shore | 0.512±0.155 | 0.284±0.089 | 0.228 | 3.54E-03 | 1.00E-17 | -0.405 |
| cg08266168 | 13 | 113760006 | F7         | TSS200           | N_Shore | 0.447±0.115 | 0.219±0.062 | 0.228 | 5.39E-04 | 6.61E-15 | -0.371 |
| cg23921523 | 21 | 45876245  | LRRC3      | 5'UTR/1st intron | Island  | 0.534±0.13  | 0.306±0.065 | 0.228 | 1.25E-03 | 9.31E-12 | -0.328 |
| cg17142134 | 3  | 170744641 | SLC2A2     | 5'UTR/1st exon   | N_Shore | 0.473±0.134 | 0.245±0.062 | 0.228 | 1.55E-03 | 7.22E-07 | -0.241 |
| cg14204433 | 1  | 7844775   | PER3       | 5'UTR            | Island  | 0.462±0.103 | 0.234±0.093 | 0.228 | 1.56E-04 | 7.75E-13 | -0.343 |
| cg14851700 | 1  | 182362230 | GLUL       | TSS1500          | S_Shore | 0.678±0.059 | 0.45±0.293  | 0.228 | 4.99E-03 | 1.11E-40 | -0.594 |
| cg16736989 | 7  | 150495791 | TMEM176B   | 5'UTR/1st intron | N_Shore | 0.532±0.16  | 0.304±0.092 | 0.228 | 4.43E-03 | 9.47E-34 | -0.549 |
| cg20708135 | 11 | 76493489  | TSKU       | 5'UTR/1st intron | N_Shore | 0.567±0.169 | 0.34±0.126  | 0.228 | 6.08E-03 | 4.64E-40 | -0.590 |
| cg15237661 | 3  | 11037574  | SLC6A1     | 5'UTR/1st intron | S_Shelf | 0.714±0.069 | 0.487±0.124 | 0.227 | 4.97E-06 | 7.64E-44 | -0.613 |
| cg25514503 | 1  | 7845070   | PER3       | 5'UTR            | Island  | 0.665±0.174 | 0.438±0.174 | 0.227 | 8.67E-03 | 4.11E-29 | -0.514 |
| cg06642677 | 1  | 203829775 | SNRPE      | TSS1500          | N_Shore | 0.423±0.13  | 0.196±0.089 | 0.227 | 1.14E-03 | 7.59E-06 | -0.219 |
| cg19390582 | 19 | 16740428  | MED26      | TSS1500          | S_Shore | 0.406±0.113 | 0.179±0.077 | 0.227 | 4.08E-04 | 1.58E-05 | -0.211 |
| cg01579001 | 12 | 56107347  | ITGA7      | TSS1500          | N_Shelf | 0.795±0.097 | 0.568±0.197 | 0.227 | 6.53E-04 | 2.61E-20 | -0.434 |
| cg02206980 | 6  | 13574034  | SIRT5      | TSS1500          | N_Shore | 0.332±0.147 | 0.105±0.046 | 0.227 | 3.03E-03 | 9.86E-10 | -0.295 |
| cg09380135 | 19 | 40789866  | AKT2       | 5'UTR/1st intron | N_Shore | 0.497±0.118 | 0.271±0.074 | 0.227 | 6.20E-04 | 2.22E-08 | -0.271 |
| cg02957185 | 1  | 161068781 | KLHDC9     | 1st exon         | Island  | 0.568±0.192 | 0.342±0.159 | 0.227 | 1.33E-02 | 3.25E-19 | -0.422 |
| cg09855983 | 7  | 29233211  | CHN2       | TSS1500          | N_Shore | 0.706±0.202 | 0.48±0.181  | 0.226 | 1.85E-02 | 7.21E-28 | -0.504 |
| cg13986417 | 12 | 110012484 | MVK        | 5'UTR/1st intron | S_Shore | 0.653±0.177 | 0.427±0.182 | 0.226 | 1.01E-02 | 4.67E-24 | -0.470 |
| cg13986417 | 12 | 110012484 | MMAB       | TSS1500          | S_Shore | 0.653±0.177 | 0.427±0.182 | 0.226 | 1.01E-02 | 1.84E-11 | -0.323 |
| cg05688348 | 4  | 53146     | ZNF595     | TSS200           | N_Shore | 0.507±0.056 | 0.281±0.091 | 0.226 | 1.25E-07 | 3.02E-14 | -0.363 |
| cg17300723 | 11 | 62647277  | SLC3A2     | TSS1500          | N_Shore | 0.475±0.06  | 0.25±0.118  | 0.225 | 1.37E-06 | 1.24E-06 | -0.236 |
| cg16370701 | 6  | 43029051  | KLC4       | 5'UTR            | S_Shore | 0.577±0.143 | 0.351±0.135 | 0.225 | 2.41E-03 | 7.99E-25 | -0.477 |
| cg02621528 | 3  | 133464047 | TF         | 5'UTR            | N_Shore | 0.582±0.159 | 0.357±0.134 | 0.225 | 4.63E-03 | 1.49E-30 | -0.525 |
| cg01510388 | 8  | 65711658  | CYP7B1     | TSS1500          | Island  | 0.39±0.194  | 0.165±0.107 | 0.225 | 1.31E-02 | 4.55E-14 | -0.360 |
| cg13924974 | 18 | 12656824  | SPIRE1     | TSS200           | N_Shore | 0.468±0.148 | 0.243±0.14  | 0.225 | 3.13E-03 | 1.99E-17 | -0.402 |
| cg07808761 | 19 | 37329760  | ZNF790     | 5'UTR/1st intron | S_Shore | 0.427±0.106 | 0.202±0.083 | 0.225 | 2.33E-04 | 1.94E-05 | -0.209 |
| cg03017946 | 4  | 72897281  | NPFFR2     | TSS1500          | N_Shore | 0.654±0.091 | 0.429±0.162 | 0.225 | 1.69E-04 | 5.92E-09 | -0.282 |
| cg00582941 | 20 | 32888855  | AHCY       | 5'UTR/1st intron | N_Shore | 0.502±0.106 | 0.278±0.062 | 0.225 | 3.16E-04 | 5.39E-20 | -0.430 |
| cg11316386 | 1  | 247275808 | C1orf229   | TSS200           | N_Shelf | 0.496±0.145 | 0.271±0.143 | 0.224 | 2.72E-03 | 2.77E-12 | -0.335 |
| cg18204685 | 3  | 15641821  | BDT        | TSS1500          | N_Shore | 0.633±0.2   | 0.409±0.191 | 0.224 | 1.91E-02 | 1.26E-15 | -0.380 |
| cg07312641 | 7  | 150778955 | FASTK      | TSS1500          | Island  | 0.527±0.124 | 0.303±0.077 | 0.224 | 9.40E-04 | 6.18E-06 | -0.221 |
| cg23974739 | 5  | 6637525   | SRD5A1     | 5'UTR/1st intron | S_Shelf | 0.621±0.065 | 0.398±0.146 | 0.224 | 1.44E-05 | 9.41E-10 | -0.296 |
| cg15652212 | 7  | 142981776 | TMEM139    | TSS1500          | N_Shelf | 0.571±0.136 | 0.348±0.102 | 0.224 | 1.70E-03 | 5.75E-18 | -0.408 |
| cg20758593 | 5  | 169659863 | C5orf58    | TSS200           | Island  | 0.631±0.098 | 0.407±0.161 | 0.224 | 2.79E-04 | 6.65E-11 | -0.314 |
| cg10519437 | 14 | 35184556  | CFL2       | TSS1500          | S_Shore | 0.537±0.157 | 0.313±0.158 | 0.224 | 5.02E-03 | 1.58E-11 | -0.324 |
| cg09024606 | 1  | 2324221   | RER1       | 5'UTR/1st intron | S_Shore | 0.419±0.14  | 0.196±0.072 | 0.223 | 2.25E-03 | 7.94E-08 | -0.261 |
| cg10210624 | 19 | 58662595  | ZNF329     | TSS1500          | N_Shelf | 0.511±0.14  | 0.287±0.168 | 0.223 | 2.80E-03 | 2.13E-12 | -0.337 |
| cg12404831 | 2  | 192114017 | MYO1B      | 5'UTR/1st intron | S_Shelf | 0.433±0.134 | 0.21±0.124  | 0.223 | 1.58E-03 | 1.23E-27 | -0.502 |
| cg01812328 | 2  | 211091510 | ACADL      | TSS1500          | S_Shore | 0.7±0.11    | 0.477±0.199 | 0.223 | 1.32E-03 | 1.82E-25 | -0.483 |
| cg10772086 | 3  | 133464651 | TF         | 5'UTR            | N_Shore | 0.422±0.113 | 0.199±0.05  | 0.223 | 6.29E-04 | 3.20E-16 | -0.388 |
| cg08032525 | 3  | 184096413 | THPO       | 5'UTR/1st intron | N_Shelf | 0.752±0.102 | 0.529±0.189 | 0.223 | 7.71E-04 | 5.09E-31 | -0.529 |
| cg08032525 | 3  | 184096413 | CHRD       | TSS1500          | N_Shelf | 0.752±0.102 | 0.529±0.189 | 0.223 | 7.71E-04 | 3.04E-12 | -0.335 |
| cg18251984 | 17 | 20799162  | CCDC144NL  | 1st exon         | Island  | 0.708±0.089 | 0.485±0.13  | 0.223 | 6.20E-05 | 5.75E-07 | -0.243 |
| cg08751913 | 6  | 18387077  | RNF144B    | TSS1500          | N_Shore | 0.378±0.104 | 0.155±0.078 | 0.222 | 2.38E-04 | 2.50E-06 | -0.230 |
| cg17197774 | 8  | 59467209  | SDCBP      | 5'UTR/1st intron | S_Shore | 0.357±0.173 | 0.135±0.088 | 0.222 | 7.91E-03 | 5.93E-21 | -0.440 |
| cg06277588 | 6  | 13489246  | GFOD1      | TSS1500          | S_Shore | 0.868±0.043 | 0.646±0.215 | 0.222 | 4.60E-04 | 2.38E-05 | -0.207 |
| cg19146119 | 2  | 234668042 | UGT1A1     | TSS1500          | S_Shelf | 0.687±0.116 | 0.465±0.202 | 0.222 | 1.91E-03 | 5.72E-14 | -0.359 |
| cg21659949 | 22 | 22020025  | PPIL2      | TSS1500          | N_Shore | 0.449±0.048 | 0.228±0.066 | 0.222 | 1.13E-08 | 3.13E-09 | -0.287 |
| cg01217071 | 2  | 201450323 | AOX1       | TSS1500          | N_Shore | 0.364±0.138 | 0.142±0.054 | 0.222 | 2.27E-03 | 8.51E-10 | -0.296 |
| cg23888304 | 17 | 1554059   | RILP       | TSS1500          | S_Shore | 0.809±0.058 | 0.587±0.167 | 0.221 | 4.53E-05 | 6.84E-09 | -0.281 |
| cg11405475 | 1  | 203830200 | SNRPE      | TSS1500          | N_Shore | 0.393±0.117 | 0.172±0.074 | 0.221 | 6.67E-04 | 5.24E-10 | -0.300 |
| cg09376922 | 3  | 184095976 | THPO       | 5'UTR            | N_Shelf | 0.467±0.12  | 0.246±0.046 | 0.221 | 1.02E-03 | 2.30E-29 | -0.516 |
| cg05267955 | 6  | 30881562  | VARS2      | TSS1500          | Island  | 0.39±0.11   | 0.169±0.068 | 0.221 | 4.48E-04 | 4.45E-08 | -0.266 |
| cg00042254 | 1  | 46019963  | AKR1A1     | 5'UTR            | S_Shelf | 0.606±0.144 | 0.385±0.106 | 0.221 | 2.75E-03 | 1.25E-22 | -0.457 |
| cg26291655 | 15 | 86315115  | KLHL25     | 5'UTR/1st intron | S_Shelf | 0.414±0.117 | 0.194±0.088 | 0.221 | 6.33E-04 | 3.91E-09 | -0.285 |
| cg15729154 | 11 | 2925026   | SLC22A18A5 | 5'UTR/1st exon   | S_Shore | 0.494±0.139 | 0.273±0.071 | 0.221 | 2.38E-03 | 9.14E-16 | -0.382 |
| cg12746427 | 4  | 53362     | ZNF595     | 5'UTR/1st exon   | Island  | 0.525±0.085 | 0.305±0.089 | 0.221 | 3.19E-05 | 5.22E-18 | -0.409 |
| cg01550445 | 11 | 72929983  | P2RY2      | 5'UTR/1st intron | S_Shore | 0.497±0.173 | 0.276±0.166 | 0.220 | 9.69E-03 | 1.13E-26 | -0.493 |
| cg08594681 | 8  | 27468684  | CLU        | 1st exon         | N_Shelf | 0.358±0.1   | 0.138±0.062 | 0.220 | 2.31E-04 | 8.01E-08 | -0.261 |
| cg27379442 | 17 | 4801965   | C17orf107  | TSS1500          | N_Shore | 0.615±0.117 | 0.395±0.122 | 0.220 | 6.55E-04 | 3.72E-10 | -0.302 |
| cg15832329 | 2  | 242296992 | FARP2      | 5'UTR/1st intron | S_Shore | 0.499±0.081 | 0.279±0.07  | 0.220 | 2.43E-05 | 2.74E-07 | -0.250 |
| cg02078520 | 1  | 84944298  | RPF1       | TSS1500          | N_Shore | 0.591±0.087 | 0.371±0.143 | 0.220 | 8.80E-05 | 4.25E-06 | -0.224 |
| cg21967668 | 19 | 49259265  | FGF21      | 5'UTR            | S_Shelf | 0.481±0.112 | 0.261±0.091 | 0.220 | 4.54E-04 | 4.44E-07 | -0.246 |
| cg02346062 | 6  | 24491168  | GPLD1      | TSS1500          | N_Shelf | 0.573±0.079 | 0.354±0.127 | 0.220 | 2.52E-05 | 1.68E-16 | -0.391 |
| cg07572927 | 14 | 21155679  | ANG        | 5'UTR/1st intron | S_Shelf | 0.471±0.119 | 0.251±0.061 | 0.220 | 8.91E-04 | 5.84E-06 | -0.221 |
| cg03546163 | 6  | 35654363  | FKBP5      | 5'UTR            | N_Shore | 0.52±0.158  | 0.301±0.124 | 0.219 | 5.11E-03 | 3.94E-11 | -0.318 |
| cg00359590 | 8  | 27469673  | CLU        | 5'UTR/1st intron | N_Shelf | 0.482±0.117 | 0.262±0.106 | 0.219 | 6.12E-04 | 1.15E-09 | -0.294 |
| cg16419724 | 5  | 68711519  | MARVELD2   | 5'UTR/1st intron | Island  | 0.4±0.104   | 0.181±0.064 | 0.219 | 3.14E-04 | 9.80E-13 | -0.342 |
| cg01189606 | 3  | 48471901  | PLXNB1     | TSS1500          | S_Shore | 0.4±0.114   | 0.181±0.053 | 0.219 | 7.20E-04 | 2.07E-06 | -0.231 |
| cg02789126 | 2  | 234667777 | UGT1A1     | TSS1500          | S_Shelf | 0.773±0.096 | 0.554±0.182 | 0.219 | 5.60E-04 | 5.15E-12 | -0.331 |
| cg21377071 | 15 | 84323963  | ADAMTSL3   | 5'UTR/1st intron | S_Shore | 0.557±0.161 | 0.339±0.103 | 0.219 | 5.66E-03 | 1.43E-08 | -0.275 |
| cg05064489 | 10 | 102279954 | SEC31B     | TSS1500          | S_Shore | 0.616±0.086 | 0.397±0.176 | 0.218 | 2.89E-04 | 2.72E-06 | -0.229 |
| cg14792350 | 1  | 149983257 | OTUD7B     | TSS1500          | S_Shore | 0.426±0.126 | 0.208±0.078 | 0.218 | 1.28E-03 | 2.23E-12 | -0.337 |
| cg01550799 | 7  | 114561804 | MDFIC      | TSS1500          | N_Shore | 0.554±0.112 | 0.336±0.139 | 0.218 | 5.66E-04 | 8.83E-07 | -0.239 |
| cg00933603 | 6  | 30883001  | VARS2      | 5'UTR            | S_Shore | 0.531±0.079 | 0.313±0.122 | 0.218 | 2.29E-05 | 4.66E-07 | -0.245 |
| cg01250879 | 22 | 46660593  | PKDREJ     | TSS1500          | S_Shore | 0.656±0.133 | 0.438±0.141 | 0.218 | 1.94E-03 | 4.23E-06 | -0.224 |
| cg16107172 | 19 | 59023222  | SLC27A5    | 1st exon         | N_Shelf | 0.567±0.079 | 0.349±0.067 | 0.218 | 2.27E-05 | 2.52E-14 | -0.364 |
| cg24370698 | 1  | 64058614  | PGM1       | TSS1500          | N_Shore | 0.351±0.143 | 0.133±0.057 | 0.218 | 3.08E-03 | 4.50E-09 | -0.2   |

|            |    |           |            |                  |         |             |             |       |          |          |        |
|------------|----|-----------|------------|------------------|---------|-------------|-------------|-------|----------|----------|--------|
| cg04129548 | 2  | 227662083 | IRS1       | 1st exon         | Island  | 0.524±0.133 | 0.306±0.086 | 0.218 | 1.75E-03 | 5.56E-07 | -0.244 |
| cg05343105 | 16 | 29801371  | KIF22      | TSS1500          | N_Shore | 0.416±0.111 | 0.199±0.055 | 0.218 | 5.88E-04 | 6.08E-08 | -0.263 |
| cg05175337 | 5  | 80596475  | ZCCHC9     | TSS1500          | N_Shore | 0.371±0.108 | 0.153±0.056 | 0.218 | 5.03E-04 | 2.15E-11 | -0.322 |
| cg26234644 | 17 | 10634427  | TMEM220    | TSS1500          | S_Shore | 0.573±0.162 | 0.356±0.092 | 0.217 | 6.13E-03 | 5.85E-12 | -0.331 |
| cg08845721 | 5  | 142780693 | NR3C1      | 5'UTR/1st intron | N_Shore | 0.376±0.097 | 0.158±0.071 | 0.217 | 1.74E-04 | 6.51E-06 | -0.220 |
| cg11142617 | 1  | 2324205   | RER1       | 5'UTR/1st intron | S_Shore | 0.371±0.135 | 0.154±0.058 | 0.217 | 2.25E-03 | 1.29E-07 | -0.257 |
| cg21523719 | 1  | 24128335  | GALE       | TSS1500          | S_Shore | 0.666±0.088 | 0.449±0.124 | 0.217 | 6.99E-05 | 3.58E-12 | -0.334 |
| cg06983052 | 1  | 90288099  | LRRC8D     | 5'UTR/1st intron | S_Shore | 0.411±0.108 | 0.194±0.047 | 0.217 | 5.33E-04 | 1.34E-10 | -0.310 |
| cg12876594 | 9  | 35791798  | NPR2       | TSS1500          | S_Shore | 0.393±0.121 | 0.176±0.073 | 0.217 | 9.98E-04 | 2.97E-18 | -0.411 |
| cg20893838 | 6  | 7145478   | RREB1      | 5'UTR/1st intron | S_Shelf | 0.521±0.048 | 0.304±0.094 | 0.217 | 6.98E-08 | 2.01E-05 | -0.208 |
| cg03269757 | 2  | 38602134  | ATL2       | 5'UTR/1st intron | N_Shore | 0.607±0.148 | 0.39±0.159  | 0.217 | 4.44E-03 | 1.53E-10 | -0.309 |
| cg01587454 | 8  | 88886051  | DCAF4L2    | 1st exon         | N_Shore | 0.589±0.145 | 0.372±0.204 | 0.217 | 6.23E-03 | 1.05E-18 | -0.416 |
| cg16563370 | 17 | 33775952  | SLFN13     | TSS200           | N_Shore | 0.532±0.144 | 0.315±0.133 | 0.217 | 3.23E-03 | 5.22E-10 | -0.300 |
| cg15157024 | 3  | 58481149  | KCTD6      | 5'UTR/1st intron | S_Shelf | 0.708±0.07  | 0.492±0.217 | 0.217 | 9.09E-04 | 3.47E-30 | -0.522 |
| cg06972969 | 10 | 60935663  | PHYHIP1    | TSS1500          | N_Shore | 0.339±0.107 | 0.122±0.044 | 0.217 | 5.32E-04 | 6.75E-09 | -0.281 |
| cg14621763 | 9  | 8856695   | PTPRD      | 5'UTR            | N_Shore | 0.732±0.078 | 0.516±0.259 | 0.216 | 3.80E-03 | 2.63E-18 | -0.412 |
| cg16855929 | 1  | 231561414 | EGLN1      | TSS1500          | S_Shelf | 0.709±0.095 | 0.492±0.213 | 0.216 | 1.47E-03 | 2.01E-05 | -0.208 |
| cg04064050 | 6  | 127663586 | ECHDC1     | 5'UTR/1st intron | N_Shore | 0.45±0.114  | 0.233±0.066 | 0.216 | 6.80E-04 | 7.56E-11 | -0.314 |
| cg08113027 | 3  | 142683329 | PAQR9      | TSS1500          | S_Shore | 0.549±0.146 | 0.333±0.141 | 0.216 | 3.68E-03 | 3.56E-08 | -0.267 |
| cg02415661 | 19 | 16308183  | AP1M1      | TSS1500          | N_Shore | 0.453±0.13  | 0.237±0.085 | 0.216 | 1.64E-03 | 3.24E-08 | -0.268 |
| cg00063909 | 2  | 64877006  | SERTAD2    | 5'UTR/1st intron | N_Shelf | 0.53±0.07   | 0.314±0.056 | 0.216 | 7.75E-06 | 7.48E-07 | -0.241 |
| cg03083695 | 9  | 130659142 | ST6GALNAC6 | 5'UTR/1st intron | N_Shore | 0.789±0.074 | 0.573±0.156 | 0.216 | 7.22E-05 | 2.17E-24 | -0.473 |
| cg10436546 | 16 | 66969837  | CES2       | 5'UTR/1st exon   | Island  | 0.464±0.121 | 0.248±0.066 | 0.216 | 1.08E-03 | 1.82E-23 | -0.465 |
| cg08481491 | 3  | 125900108 | ALDH1L1    | TSS1500          | S_Shore | 0.409±0.117 | 0.194±0.051 | 0.216 | 9.61E-04 | 6.43E-19 | -0.419 |
| cg21784940 | 7  | 150067807 | REPIN1     | 5'UTR            | S_Shore | 0.474±0.157 | 0.258±0.15  | 0.216 | 6.04E-03 | 9.49E-10 | -0.296 |
| cg04027302 | 1  | 236685524 | LGALS8     | 5'UTR            | N_Shore | 0.756±0.079 | 0.54±0.174  | 0.216 | 2.16E-04 | 2.76E-07 | -0.250 |
| cg10508783 | 2  | 165478953 | GRB14      | TSS1500          | S_Shore | 0.544±0.136 | 0.328±0.117 | 0.216 | 2.19E-03 | 4.87E-06 | -0.223 |
| cg16474952 | 16 | 16315534  | ABCC6      | 5'UTR            | N_Shore | 0.554±0.11  | 0.339±0.123 | 0.216 | 4.62E-04 | 2.60E-20 | -0.434 |
| cg16198692 | 5  | 115152835 | CDO1       | TSS1500          | S_Shore | 0.393±0.146 | 0.178±0.058 | 0.215 | 3.70E-03 | 2.86E-21 | -0.443 |
| cg01042334 | 8  | 145114994 | OPLAH      | 5'UTR/1st intron | S_Shore | 0.516±0.159 | 0.3±0.065   | 0.215 | 5.92E-03 | 2.94E-13 | -0.349 |
| cg18061319 | 10 | 71891928  | AIFM2      | 5'UTR/1st intron | N_Shore | 0.54±0.071  | 0.325±0.063 | 0.215 | 7.74E-06 | 2.81E-06 | -0.228 |
| cg00992048 | 1  | 1695585   | NADK       | 5'UTR            | S_Shelf | 0.537±0.056 | 0.321±0.089 | 0.215 | 2.60E-07 | 2.78E-09 | -0.288 |
| cg25135457 | 17 | 40715244  | COASY      | 1st exon         | N_Shelf | 0.542±0.139 | 0.326±0.082 | 0.215 | 2.65E-03 | 1.45E-06 | -0.235 |
| cg05544413 | 6  | 127663627 | ECHDC1     | 5'UTR/1st intron | N_Shore | 0.439±0.119 | 0.224±0.069 | 0.215 | 9.82E-04 | 8.80E-07 | -0.239 |
| cg10903281 | 3  | 11036746  | SLC6A1     | 5'UTR/1st intron | S_Shore | 0.592±0.151 | 0.377±0.142 | 0.215 | 4.79E-03 | 1.37E-39 | -0.587 |
| cg20576322 | 4  | 85886384  | WDFY3      | 5'UTR/1st intron | N_Shore | 0.607±0.199 | 0.392±0.193 | 0.215 | 2.32E-02 | 2.34E-06 | -0.230 |
| cg05913474 | 8  | 144815204 | FAM83H     | 5'UTR/1st intron | Island  | 0.512±0.159 | 0.297±0.063 | 0.215 | 5.97E-03 | 1.01E-25 | -0.485 |
| cg25182621 | 3  | 184097440 | CHRD       | TSS1500          | N_Shore | 0.554±0.115 | 0.339±0.103 | 0.215 | 6.60E-04 | 2.77E-06 | -0.229 |
| cg27029623 | 4  | 39368603  | RFC1       | TSS1500          | S_Shore | 0.579±0.104 | 0.365±0.07  | 0.215 | 3.45E-04 | 1.16E-11 | -0.326 |
| cg15255455 | 19 | 4534986   | PLIN5      | 5'UTR/1st intron | N_Shore | 0.382±0.104 | 0.168±0.072 | 0.215 | 3.44E-04 | 1.44E-12 | -0.339 |
| cg24812167 | 9  | 139293358 | SNAPC4     | TSS1500          | N_Shore | 0.476±0.125 | 0.262±0.087 | 0.214 | 1.31E-03 | 1.69E-05 | -0.210 |
| cg14123992 | 19 | 45407868  | APOE       | TSS1500          | N_Shelf | 0.471±0.12  | 0.257±0.097 | 0.214 | 9.68E-04 | 4.57E-09 | -0.284 |
| cg21090344 | 17 | 6948023   | SLC16A11   | TSS1500          | S_Shore | 0.489±0.126 | 0.275±0.099 | 0.214 | 1.32E-03 | 1.85E-10 | -0.307 |
| cg02304481 | 2  | 97652129  | FAM178B    | 5'UTR/1st exon   | Island  | 0.723±0.104 | 0.509±0.158 | 0.214 | 5.83E-04 | 3.50E-11 | -0.319 |
| cg26493224 | 13 | 52980671  | THSD1      | TSS200           | S_Shore | 0.365±0.132 | 0.151±0.083 | 0.214 | 1.90E-03 | 1.86E-08 | -0.273 |
| cg12524553 | 20 | 32952045  | ITCH       | 5'UTR/1st intron | S_Shore | 0.394±0.126 | 0.18±0.078  | 0.214 | 1.44E-03 | 1.41E-05 | -0.212 |
| cg07230486 | 7  | 11012873  | PHF14      | TSS1500          | N_Shore | 0.482±0.159 | 0.268±0.09  | 0.214 | 6.06E-03 | 3.63E-10 | -0.303 |
| cg08036764 | 22 | 24891220  | UPB1       | TSS200           | Island  | 0.625±0.125 | 0.412±0.074 | 0.214 | 1.36E-03 | 2.85E-26 | -0.490 |
| cg25995289 | 19 | 30207352  | C19orf12   | TSS1500          | S_Shore | 0.606±0.076 | 0.393±0.145 | 0.214 | 5.62E-05 | 1.61E-09 | -0.292 |
| cg13393830 | 19 | 52391605  | ZNF577     | TSS1500          | S_Shore | 0.673±0.129 | 0.46±0.196  | 0.214 | 3.60E-03 | 7.10E-33 | -0.542 |
| cg26033529 | 2  | 20425981  | SDC1       | TSS1500          | S_Shore | 0.524±0.11  | 0.311±0.075 | 0.213 | 5.47E-04 | 4.05E-11 | -0.318 |
| cg08180572 | 16 | 28985143  | SPNS1      | TSS1500          | N_Shore | 0.675±0.127 | 0.462±0.225 | 0.213 | 5.46E-03 | 1.18E-05 | -0.214 |
| cg05005077 | 1  | 247276966 | C1orf229   | TSS1500          | N_Shelf | 0.451±0.124 | 0.238±0.078 | 0.213 | 1.34E-03 | 3.15E-06 | -0.227 |
| cg23629150 | 8  | 144416404 | TOP1MT     | 5'UTR            | N_Shore | 0.586±0.164 | 0.373±0.158 | 0.213 | 8.69E-03 | 6.23E-12 | -0.330 |
| cg15291090 | 13 | 36788776  | SOHLH2     | TSS200           | Island  | 0.73±0.119  | 0.517±0.158 | 0.213 | 1.35E-03 | 8.22E-06 | -0.218 |
| cg17519037 | 17 | 36452075  | MRPL45     | TSS1500          | N_Shore | 0.436±0.113 | 0.223±0.071 | 0.213 | 7.04E-04 | 7.72E-06 | -0.218 |
| cg02006107 | 8  | 80943347  | MRPS28     | TSS1500          | S_Shore | 0.537±0.138 | 0.325±0.094 | 0.213 | 2.65E-03 | 1.36E-06 | -0.235 |
| cg22158648 | 18 | 20713759  | CABLES1    | TSS1500          | N_Shore | 0.434±0.096 | 0.222±0.078 | 0.213 | 1.71E-04 | 8.67E-11 | -0.313 |
| cg23884175 | 11 | 76495749  | TSKU       | 5'UTR/1st intron | S_Shore | 0.401±0.092 | 0.188±0.058 | 0.213 | 1.55E-04 | 1.33E-18 | -0.415 |
| cg12435725 | 3  | 58293450  | RPP14      | 5'UTR/1st intron | S_Shore | 0.404±0.115 | 0.191±0.048 | 0.213 | 9.71E-04 | 5.50E-07 | -0.244 |
| cg00501904 | 1  | 226001675 | EPHX1      | 5'UTR/1st intron | S_Shelf | 0.368±0.117 | 0.155±0.06  | 0.212 | 1.00E-03 | 5.40E-20 | -0.430 |
| cg19489188 | 19 | 4183268   | ANKRD24    | TSS200           | S_Shore | 0.495±0.125 | 0.282±0.08  | 0.212 | 1.44E-03 | 1.37E-06 | -0.235 |
| cg26916966 | 17 | 40274524  | HSPB9      | TSS1500          | Island  | 0.587±0.17  | 0.375±0.132 | 0.212 | 9.72E-03 | 9.53E-19 | -0.417 |
| cg26916966 | 17 | 40274524  | KAT2A      | TSS1500          | Island  | 0.587±0.17  | 0.375±0.132 | 0.212 | 9.72E-03 | 4.07E-05 | -0.201 |
| cg01899937 | 4  | 185723505 | ACSL1      | 5'UTR            | N_Shore | 0.616±0.125 | 0.404±0.12  | 0.212 | 1.37E-03 | 7.72E-23 | -0.459 |
| cg07346603 | 5  | 169659751 | C5orf58    | TSS1500          | N_Shore | 0.789±0.123 | 0.578±0.163 | 0.211 | 1.87E-03 | 4.55E-22 | -0.451 |
| cg26761618 | 11 | 72928926  | P2RY2      | TSS1500          | N_Shore | 0.495±0.152 | 0.284±0.1   | 0.211 | 4.96E-03 | 4.48E-23 | -0.461 |
| cg22601917 | 1  | 9294274   | H6PD       | TSS1500          | N_Shore | 0.415±0.053 | 0.204±0.07  | 0.211 | 1.13E-07 | 3.08E-22 | -0.453 |
| cg00636737 | 20 | 62695569  | TCEA2      | 5'UTR            | S_Shore | 0.455±0.097 | 0.243±0.085 | 0.211 | 1.81E-04 | 2.94E-10 | -0.304 |
| cg11556489 | 6  | 30178724  | TRIM26     | 5'UTR/1st intron | N_Shelf | 0.449±0.095 | 0.238±0.067 | 0.211 | 1.83E-04 | 5.03E-16 | -0.385 |
| cg12122057 | 11 | 12133015  | MICAL2     | 5'UTR/1st intron | Island  | 0.593±0.108 | 0.382±0.116 | 0.211 | 4.84E-04 | 1.86E-11 | -0.323 |
| cg06849167 | 11 | 61449886  | DAGLA      | 5'UTR/1st intron | S_Shore | 0.588±0.062 | 0.378±0.147 | 0.211 | 4.45E-05 | 5.09E-06 | -0.223 |
| cg07692489 | 16 | 8960972   | CARHSP1    | 5'UTR            | N_Shore | 0.391±0.111 | 0.18±0.084  | 0.211 | 5.92E-04 | 1.02E-07 | -0.259 |
| cg02349264 | 16 | 8960833   | CARHSP1    | 5'UTR            | N_Shore | 0.372±0.107 | 0.161±0.071 | 0.211 | 5.06E-04 | 3.12E-07 | -0.249 |
| cg24808901 | 1  | 95698954  | RWDD3      | TSS1500          | N_Shore | 0.367±0.116 | 0.156±0.064 | 0.210 | 9.85E-04 | 7.68E-06 | -0.218 |
| cg21320567 | 8  | 67975880  | COPS5      | TSS1500          | N_Shore | 0.454±0.113 | 0.244±0.12  | 0.210 | 7.16E-04 | 5.08E-09 | -0.283 |
| cg19026231 | 17 | 73761710  | GALK1      | TSS1500          | S_Shore | 0.411±0.13  | 0.201±0.067 | 0.210 | 2.05E-03 | 8.80E-11 | -0.312 |
| cg14757492 | 19 | 19029194  | DDX49      | TSS1500          | N_Shore | 0.573±0.152 | 0.363±0.15  | 0.210 | 6.00E-03 | 2.45E-15 | -0.377 |
| cg07838483 | 19 | 30202712  | C19orf12   | 5'UTR/1st intron | N_Shelf | 0.381±0.121 | 0.171±0.042 | 0.210 | 1.51E-03 | 9.40E-07 | -0.239 |
| cg05694095 | 5  | 169659745 | C5orf58    | TSS1500          | N_Shore | 0.765±0.106 | 0.555±0.213 | 0.210 | 2.70E-03 | 9.22E-18 | -0.406 |
| cg07896832 | 8  | 67975874  | COPS5      | TSS1500          | N_Shore | 0.438±0.117 | 0.228±0.126 | 0.210 | 9.96E-04 | 4.51E-09 | -0.284 |
| cg01303236 | 5  | 73934842  | ENC1       | 5'UTR/1st intron | N_Shore | 0.661±0.113 | 0.451±0.225 | 0.210 | 4.32E-03 | 9.68E-16 | -0.382 |
| cg03785076 | 2  | 241936915 | SNED1      | TSS1500          | N_Shore | 0.477±0.119 | 0.268±0.145 | 0.210 | 1.34E-03 | 2.54E-10 | -0.305 |
| cg18160691 | 11 | 68081686  | LRP5       | 5'UTR/1st intron | S_Shore | 0.367±0.111 | 0.158±0.07  | 0.210 | 7.09E-04 | 3.68E-06 | -0.226 |
| cg20400248 | 8  | 9005257   | PPP1R3B    | 5'UTR/1st intron | N_Shelf | 0.617±0.113 | 0.407±0.173 | 0.210 | 1.49E-03 | 1.47E-17 | -0.403 |
| cg15922246 | 7  | 150778803 | FASTK      | TSS1500          | Island  | 0.484±0.104 | 0.274±0.089 | 0.209 | 3.49E-04 | 1.17E-05 | -0.214 |
| cg10444806 | 17 | 38084428  | ORMDL3     | TSS1500          | S_Shore | 0.371±0.119 | 0.162±0.054 | 0.20  |          |          |        |

|            |    |           |            |                  |         |             |             |       |          |          |        |
|------------|----|-----------|------------|------------------|---------|-------------|-------------|-------|----------|----------|--------|
| cg16402814 | 11 | 915227    | CHID1      | TSS200           | S_Shelf | 0.463±0.1   | 0.253±0.124 | 0.209 | 2.98E-04 | 1.85E-09 | -0.291 |
| cg22989379 | 20 | 33462683  | ACSS2      | TSS200           | N_Shore | 0.58±0.156  | 0.371±0.095 | 0.209 | 6.22E-03 | 1.21E-11 | -0.326 |
| cg10081469 | 14 | 61748336  | TMEM30B    | 5'UTR/1st exon   | S_Shore | 0.393±0.109 | 0.184±0.08  | 0.209 | 5.77E-04 | 1.11E-11 | -0.326 |
| cg11836372 | 10 | 123353822 | FGFR2      | 5'UTR/1st intron | N_Shelf | 0.616±0.149 | 0.407±0.205 | 0.209 | 9.03E-03 | 1.83E-08 | -0.273 |
| cg01617211 | 16 | 90040387  | CENPBD1    | TSS1500          | S_Shore | 0.49±0.082  | 0.282±0.057 | 0.209 | 6.27E-05 | 1.05E-11 | -0.327 |
| cg20844262 | 20 | 62367372  | LIME1      | 5'UTR/1st exon   | N_Shore | 0.838±0.028 | 0.629±0.167 | 0.209 | 5.90E-05 | 1.90E-29 | -0.516 |
| cg08224159 | 6  | 151646312 | AKAP12     | TSS1500          | N_Shore | 0.514±0.164 | 0.305±0.107 | 0.209 | 8.19E-03 | 2.35E-05 | -0.207 |
| cg00319334 | 11 | 2397523   | CD81       | 5'UTR/1st exon   | N_Shore | 0.561±0.16  | 0.353±0.167 | 0.209 | 8.97E-03 | 1.54E-10 | -0.309 |
| cg17575915 | 22 | 37414442  | MPST       | TSS1500          | Island  | 0.548±0.079 | 0.34±0.07   | 0.208 | 3.25E-05 | 4.35E-07 | -0.246 |
| cg03962678 | 11 | 118398094 | TTC36      | TSS200           | N_Shelf | 0.381±0.077 | 0.173±0.049 | 0.208 | 4.45E-05 | 2.65E-09 | -0.288 |
| cg07360805 | 20 | 36148457  | BLCAP      | 5'UTR            | N_Shelf | 0.52±0.144  | 0.312±0.146 | 0.208 | 4.52E-03 | 1.17E-13 | -0.355 |
| cg20808613 | 15 | 89168305  | AEN        | 5'UTR/1st intron | S_Shelf | 0.539±0.134 | 0.331±0.224 | 0.207 | 7.88E-03 | 9.69E-08 | -0.259 |
| cg14991769 | 7  | 150497157 | TMEM176A   | TSS1500          | Island  | 0.321±0.093 | 0.113±0.067 | 0.207 | 1.82E-04 | 1.30E-08 | -0.276 |
| cg14991769 | 7  | 150497157 | TMEM176B   | 5'UTR/1st intron | Island  | 0.321±0.093 | 0.113±0.067 | 0.207 | 1.82E-04 | 2.54E-08 | -0.270 |
| cg03880355 | 5  | 74162880  | FAM169A    | TSS1500          | S_Shore | 0.373±0.125 | 0.165±0.056 | 0.207 | 1.81E-03 | 1.51E-13 | -0.353 |
| cg07058998 | 18 | 52625365  | CCDC68     | 5'UTR/1st intron | N_Shore | 0.513±0.126 | 0.306±0.134 | 0.207 | 1.89E-03 | 4.87E-10 | -0.300 |
| cg22151881 | 11 | 68082621  | LRP5       | 5'UTR/1st intron | S_Shore | 0.359±0.117 | 0.152±0.053 | 0.207 | 1.25E-03 | 1.70E-06 | -0.233 |
| cg21714557 | 13 | 113776873 | F10        | TSS1500          | S_Shelf | 0.324±0.134 | 0.117±0.061 | 0.207 | 2.85E-03 | 1.67E-05 | -0.210 |
| cg10710439 | 19 | 38183976  | ZNF781     | TSS1500          | S_Shore | 0.508±0.055 | 0.301±0.126 | 0.207 | 5.13E-06 | 2.63E-05 | -0.205 |
| cg05934698 | 12 | 121416390 | HNF1A      | 5'UTR/1st exon   | N_Shore | 0.493±0.119 | 0.286±0.07  | 0.207 | 1.22E-03 | 3.46E-24 | -0.471 |
| cg01234517 | 7  | 150021553 | LRRG61     | 5'UTR/1st intron | S_Shore | 0.532±0.125 | 0.325±0.072 | 0.207 | 1.75E-03 | 6.02E-10 | -0.299 |
| cg12912293 | 1  | 150849805 | ARNT       | TSS1500          | S_Shore | 0.548±0.14  | 0.341±0.193 | 0.207 | 6.40E-03 | 2.08E-10 | -0.306 |
| cg01596520 | 19 | 14225029  | PRKACA     | TSS200           | N_Shelf | 0.731±0.148 | 0.524±0.199 | 0.207 | 8.87E-03 | 1.61E-05 | -0.211 |
| cg27021181 | 10 | 5488346   | NET1       | TSS200           | N_Shore | 0.33±0.144  | 0.124±0.062 | 0.207 | 4.39E-03 | 1.44E-08 | -0.275 |
| cg08063051 | 16 | 1428706   | UNKL       | 5'UTR/1st intron | N_Shore | 0.494±0.135 | 0.287±0.154 | 0.207 | 6.07E-03 | 1.03E-20 | -0.438 |
| cg20305595 | 1  | 9293833   | H6PD       | TSS1500          | N_Shore | 0.509±0.066 | 0.302±0.057 | 0.207 | 6.46E-06 | 2.62E-24 | -0.473 |
| cg06906869 | 13 | 52734154  | NEK3       | TSS1500          | S_Shore | 0.626±0.091 | 0.419±0.157 | 0.207 | 3.62E-04 | 1.85E-29 | -0.516 |
| cg00716257 | 14 | 75897417  | JDP2       | 5'UTR/1st intron | S_Shore | 0.748±0.102 | 0.542±0.243 | 0.206 | 5.49E-03 | 7.09E-22 | -0.449 |
| cg16124934 | 14 | 75389480  | RPS6KL1    | TSS1500          | N_Shore | 0.521±0.115 | 0.315±0.141 | 0.206 | 1.11E-03 | 3.06E-40 | -0.591 |
| cg17818912 | 5  | 68787696  | OCLN       | TSS1500          | N_Shore | 0.379±0.128 | 0.173±0.059 | 0.206 | 2.19E-03 | 5.09E-06 | -0.223 |
| cg14032742 | 1  | 229409358 | RAB4A      | 5'UTR/1st intron | S_Shelf | 0.563±0.131 | 0.357±0.091 | 0.206 | 2.30E-03 | 1.61E-21 | -0.446 |
| cg00368356 | 19 | 39395717  | NFKB1B     | 5'UTR            | N_Shore | 0.527±0.157 | 0.321±0.101 | 0.206 | 7.05E-03 | 1.07E-09 | -0.295 |
| cg02026246 | 11 | 22687589  | GAS2       | TSS1500          | N_Shore | 0.609±0.161 | 0.403±0.161 | 0.206 | 9.77E-03 | 6.44E-08 | -0.262 |
| cg25612480 | 8  | 48920460  | UBE2V2     | TSS1500          | N_Shore | 0.425±0.099 | 0.219±0.107 | 0.206 | 2.77E-04 | 4.24E-06 | -0.224 |
| cg04756491 | 14 | 23385384  | RBM23      | 5'UTR            | N_Shelf | 0.562±0.116 | 0.357±0.156 | 0.205 | 1.52E-03 | 9.72E-06 | -0.216 |
| cg16363146 | 11 | 22689281  | GAS2       | 5'UTR/1st intron | S_Shore | 0.656±0.161 | 0.451±0.21  | 0.205 | 1.44E-02 | 5.93E-15 | -0.372 |
| cg01341572 | 12 | 121416512 | HNF1A      | 5'UTR/1st exon   | Island  | 0.537±0.125 | 0.332±0.083 | 0.205 | 1.75E-03 | 4.44E-21 | -0.441 |
| cg21874832 | 2  | 97652249  | FAM178B    | 5'UTR/1st exon   | Island  | 0.72±0.126  | 0.514±0.194 | 0.205 | 4.34E-03 | 1.71E-13 | -0.352 |
| cg10222925 | 8  | 88885186  | DCAF4L2    | 1st exon         | N_Shore | 0.381±0.076 | 0.176±0.056 | 0.205 | 3.62E-05 | 9.24E-11 | -0.312 |
| cg01933228 | 1  | 100316637 | AGL        | 5'UTR/1st exon   | S_Shore | 0.363±0.104 | 0.158±0.066 | 0.205 | 5.12E-04 | 1.75E-13 | -0.352 |
| cg07880854 | 2  | 112895559 | FBLN7      | TSS1500          | N_Shore | 0.452±0.168 | 0.248±0.15  | 0.205 | 1.15E-02 | 1.57E-05 | -0.211 |
| cg18711369 | 17 | 38081186  | ORMDL3     | 5'UTR            | N_Shelf | 0.416±0.107 | 0.211±0.056 | 0.205 | 6.95E-04 | 1.73E-15 | -0.379 |
| cg11819637 | 3  | 184095505 | THPO       | 5'UTR            | N_Shelf | 0.425±0.123 | 0.22±0.046  | 0.205 | 1.91E-03 | 8.26E-27 | -0.495 |
| cg01656133 | 11 | 17566772  | USH1C      | TSS1500          | S_Shore | 0.847±0.068 | 0.642±0.161 | 0.205 | 1.31E-04 | 1.47E-05 | -0.212 |
| cg07141002 | 22 | 38201690  | H1FO       | 1st exon         | Island  | 0.339±0.097 | 0.134±0.06  | 0.205 | 3.20E-04 | 1.20E-14 | -0.368 |
| cg09831081 | 21 | 47647568  | LSS        | 5'UTR            | N_Shore | 0.654±0.135 | 0.449±0.171 | 0.205 | 4.41E-03 | 3.97E-20 | -0.432 |
| cg12911952 | 11 | 2924523   | SLC22A18   | 5'UTR            | S_Shore | 0.525±0.123 | 0.32±0.078  | 0.204 | 1.63E-03 | 5.67E-06 | -0.221 |
| cg17852385 | 15 | 75019188  | CYP1A1     | TSS1500          | Island  | 0.326±0.134 | 0.122±0.038 | 0.204 | 3.22E-03 | 9.85E-06 | -0.216 |
| cg19047340 | 20 | 33873068  | EIF6       | TSS1500          | S_Shore | 0.486±0.093 | 0.282±0.061 | 0.204 | 2.22E-04 | 6.37E-09 | -0.281 |
| cg03594078 | 8  | 22131675  | PIWIL2     | TSS1500          | N_Shore | 0.398±0.099 | 0.194±0.07  | 0.204 | 3.40E-04 | 7.06E-07 | -0.241 |
| cg08387551 | 5  | 72417180  | TMEM171    | 5'UTR/1st intron | S_Shore | 0.664±0.116 | 0.46±0.204  | 0.204 | 3.78E-03 | 4.38E-09 | -0.284 |
| cg03890680 | 1  | 227504721 | CDC42BPA   | 1st exon         | N_Shore | 0.324±0.098 | 0.12±0.062  | 0.204 | 3.47E-04 | 3.62E-18 | -0.410 |
| cg15481791 | 1  | 203829890 | SNRPE      | TSS1500          | N_Shore | 0.417±0.106 | 0.212±0.091 | 0.204 | 5.15E-04 | 9.20E-06 | -0.217 |
| cg13008631 | 2  | 227663034 | IRS1       | 1st exon         | Island  | 0.498±0.103 | 0.294±0.079 | 0.204 | 4.41E-04 | 8.64E-12 | -0.328 |
| cg25017777 | 1  | 9298817   | H6PD       | 5'UTR/1st intron | S_Shelf | 0.451±0.135 | 0.247±0.067 | 0.204 | 3.11E-03 | 4.91E-07 | -0.245 |
| cg09289251 | 16 | 2207865   | TRAF7      | 5'UTR/1st intron | S_Shore | 0.477±0.12  | 0.273±0.056 | 0.204 | 1.59E-03 | 5.54E-07 | -0.244 |
| cg02585931 | 22 | 38219283  | GALR3      | TSS200           | N_Shore | 0.578±0.119 | 0.375±0.141 | 0.204 | 1.59E-03 | 2.56E-07 | -0.251 |
| cg08005460 | 17 | 38473382  | RARA       | 5'UTR/1st intron | S_Shore | 0.347±0.115 | 0.143±0.068 | 0.204 | 1.11E-03 | 5.29E-06 | -0.222 |
| cg08472797 | 11 | 2925570   | SLC22A18AS | TSS1500          | S_Shore | 0.524±0.137 | 0.321±0.091 | 0.204 | 3.39E-03 | 6.43E-09 | -0.281 |
| cg02801114 | 6  | 125476162 | TPD52L1    | 5'UTR/1st intron | S_Shore | 0.468±0.184 | 0.265±0.06  | 0.203 | 1.65E-02 | 6.89E-18 | -0.407 |
| cg16540789 | 16 | 75150784  | LDHD       | TSS200           | S_Shore | 0.343±0.106 | 0.14±0.048  | 0.203 | 7.58E-04 | 1.53E-11 | -0.324 |
| cg09899215 | 16 | 75150799  | LDHD       | TSS200           | S_Shore | 0.341±0.101 | 0.138±0.055 | 0.203 | 4.83E-04 | 1.35E-09 | -0.293 |
| cg02733918 | 20 | 47801453  | STAU1      | 5'UTR            | N_Shelf | 0.406±0.109 | 0.203±0.055 | 0.203 | 8.53E-04 | 2.19E-05 | -0.207 |
| cg08633074 | 16 | 11837719  | TXNDC11    | TSS1500          | S_Shore | 0.482±0.102 | 0.279±0.07  | 0.203 | 4.49E-04 | 5.51E-08 | -0.264 |
| cg01963374 | 11 | 704987    | EPS8L2     | TSS1500          | N_Shore | 0.404±0.098 | 0.201±0.073 | 0.202 | 3.06E-04 | 1.18E-05 | -0.214 |
| cg04781305 | 10 | 35624429  | CCNY       | 5'UTR            | N_Shore | 0.409±0.133 | 0.207±0.054 | 0.202 | 3.23E-03 | 1.11E-07 | -0.258 |
| cg02898721 | 17 | 38473222  | RARA       | 5'UTR/1st intron | S_Shore | 0.436±0.108 | 0.234±0.082 | 0.202 | 6.75E-04 | 4.28E-07 | -0.246 |
| cg05053220 | 16 | 56457177  | AMFR       | 5'UTR/1st intron | N_Shore | 0.512±0.123 | 0.311±0.13  | 0.202 | 1.90E-03 | 5.51E-08 | -0.264 |
| cg08202720 | 2  | 239196219 | PER2       | 5'UTR/1st intron | N_Shore | 0.657±0.132 | 0.455±0.166 | 0.202 | 4.18E-03 | 7.43E-16 | -0.383 |
| cg05414254 | 16 | 53535931  | AKTIP      | 5'UTR/1st intron | N_Shore | 0.452±0.131 | 0.25±0.096  | 0.202 | 2.60E-03 | 3.44E-10 | -0.303 |
| cg09424348 | 6  | 30881549  | VARS2      | TSS1500          | Island  | 0.33±0.105  | 0.129±0.063 | 0.201 | 6.14E-04 | 1.26E-09 | -0.293 |
| cg25383093 | 6  | 83902161  | RWDD2A     | TSS1500          | N_Shore | 0.427±0.129 | 0.226±0.092 | 0.201 | 2.48E-03 | 3.20E-07 | -0.249 |
| cg22163535 | 18 | 6411387   | L3MBTL4    | 5'UTR/1st intron | N_Shelf | 0.641±0.073 | 0.44±0.203  | 0.201 | 1.12E-03 | 2.18E-08 | -0.271 |
| cg27181716 | 3  | 133467304 | TF         | 5'UTR            | S_Shore | 0.504±0.099 | 0.303±0.058 | 0.201 | 4.44E-04 | 2.26E-12 | -0.337 |
| cg23956760 | 19 | 19178708  | SLC25A42   | 5'UTR/1st intron | S_Shelf | 0.755±0.064 | 0.554±0.199 | 0.201 | 8.22E-04 | 1.64E-10 | -0.308 |
| cg09118420 | 22 | 30477270  | HORMAD2    | 5'UTR            | S_Shore | 0.758±0.133 | 0.557±0.24  | 0.201 | 1.20E-02 | 3.74E-43 | -0.609 |
| cg10287137 | 11 | 72929054  | P2RY2      | TSS1500          | Island  | 0.469±0.101 | 0.268±0.068 | 0.201 | 4.49E-04 | 6.28E-08 | -0.263 |
| cg04439218 | 5  | 37839407  | GDNF       | 5'UTR/1st intron | Island  | 0.356±0.18  | 0.155±0.106 | 0.201 | 1.64E-02 | 6.84E-07 | -0.242 |
| cg04921771 | 1  | 40349687  | TRIT1      | TSS1500          | S_Shore | 0.486±0.075 | 0.286±0.121 | 0.200 | 4.29E-05 | 4.65E-06 | -0.223 |
| cg20852557 | 3  | 184035519 | EIF4G1     | 5'UTR            | S_Shelf | 0.525±0.146 | 0.325±0.114 | 0.200 | 5.46E-03 | 5.08E-10 | -0.300 |
| cg07787240 | 1  | 9130576   | SLC2A5     | 5'UTR/1st intron | N_Shore | 0.528±0.107 | 0.327±0.075 | 0.200 | 6.86E-04 | 3.03E-06 | -0.228 |
| cg02719634 | 11 | 2924899   | SLC22A18AS | 5'UTR/1st exon   | S_Shore | 0.539±0.145 | 0.338±0.111 | 0.200 | 5.22E-03 | 8.45E-23 | -0.458 |
| cg11193767 | 4  | 83930905  | LINS4      | 5'UTR/1st intron | N_Shelf | 0.503±0.127 | 0.302±0.086 | 0.200 | 2.28E-03 | 1.54E-06 | -0.234 |
| cg10000250 | 17 | 80023016  | DUS1L      | 5'UTR/1st intron | Island  | 0.497±0.084 | 0.297±0.096 | 0.200 | 7.30E-05 | 5.97E-08 | -0.263 |
| cg10668614 | 11 | 915163    | CHID1      | TSS200           | S_Shelf | 0.448±0.087 | 0.248±0.125 | 0.200 | 1.50E-04 | 1.04E-09 | -0.295 |
| cg13580783 | 1  | 24128567  | GALE       | TSS1500          | S_Shore | 0.422±0.105 | 0.222±0.07  | 0.200 | 6.22E-04 | 5.94E-13 | -0.345 |
| cg00516966 | 17 | 19651653  | ALDH3A1    | 5'UTR/1st exon   | S_Shelf | 0.453±0.109 | 0.253±0     |       |          |          |        |

|            |    |           |           |                  |         |             |             |         |          |          |        |
|------------|----|-----------|-----------|------------------|---------|-------------|-------------|---------|----------|----------|--------|
| cg07859880 | 19 | 39323060  | ECH1      | TSS1500          | S_Shore | 0.316±0.089 | 0.116±0.048 | 0.200   | 2.29E-04 | 6.20E-09 | -0.281 |
| cg07124366 | 3  | 10361044  | SEC13     | 5'UTR/1st intron | N_Shore | 0.434±0.145 | 0.234±0.088 | 0.200   | 5.33E-03 | 7.71E-06 | -0.218 |
| cg08190844 | 16 | 2526203   | TBC1D24   | 5'UTR/1st intron | S_Shore | 0.521±0.15  | 0.321±0.131 | 0.200   | 6.78E-03 | 1.33E-10 | -0.310 |
| cg07765167 | 17 | 36451845  | MRPL45    | TSS1500          | N_Shore | 0.426±0.107 | 0.226±0.069 | 0.200   | 7.32E-04 | 9.22E-06 | -0.217 |
| cg27494647 | 7  | 150038898 | RARRES2   | TSS200           | Island  | 0.326±0.107 | 0.126±0.047 | 0.200   | 9.14E-04 | 4.12E-06 | -0.225 |
| cg11120551 | 1  | 146713996 | CHD1L     | 5'UTR            | N_Shore | 0.335±0.125 | 0.135±0.049 | 0.200   | 2.38E-03 | 3.04E-05 | -0.204 |
| cg02560408 | 10 | 62757486  | RHOBTB1   | 5'UTR/1st intron | N_Shelf | 0.73±0.102  | 0.53±0.214  | 0.200   | 3.70E-03 | 1.51E-06 | -0.234 |
| cg26578274 | 15 | 78832312  | PSMA4     | TSS1500          | N_Shore | 0.6±0.091   | 0.401±0.224 | 0.200   | 3.56E-03 | 1.23E-05 | -0.214 |
| cg06568323 | 13 | 100745507 | PCCA      | 5'UTR/1st intron | S_Shelf | 0.752±0.097 | 0.553±0.192 | 0.199   | 1.83E-03 | 9.91E-15 | -0.369 |
| cg27203309 | 17 | 19550687  | ALDH3A2   | TSS1500          | N_Shore | 0.398±0.105 | 0.198±0.052 | 0.199   | 7.77E-04 | 9.70E-08 | -0.259 |
| cg20304988 | 7  | 29237766  | CHN2      | 5'UTR/1st intron | S_Shelf | 0.676±0.112 | 0.477±0.166 | 0.199   | 1.89E-03 | 6.64E-24 | -0.469 |
| cg19884658 | 1  | 6664268   | KLHL21    | TSS1500          | S_Shore | 0.33±0.107  | 0.131±0.052 | 0.199   | 8.64E-04 | 5.24E-10 | -0.300 |
| cg27367170 | 10 | 5488628   | NET1      | 1st exon         | Island  | 0.348±0.122 | 0.149±0.076 | 0.199   | 1.91E-03 | 1.32E-07 | -0.256 |
| cg16937168 | 2  | 241936844 | SNED1     | TSS1500          | N_Shore | 0.505±0.113 | 0.306±0.205 | 0.199   | 4.26E-03 | 1.23E-15 | -0.380 |
| cg01730857 | 8  | 144912074 | PUF60     | TSS1500          | Island  | 0.441±0.133 | 0.242±0.069 | 0.199   | 3.35E-03 | 2.86E-14 | -0.363 |
| cg02306936 | 6  | 30881316  | VAR52     | TSS1500          | N_Shore | 0.418±0.111 | 0.219±0.073 | 0.199   | 9.50E-04 | 1.78E-09 | -0.291 |
| cg26306893 | 20 | 37074908  | SNHG11    | TSS1500          | N_Shore | 0.345±0.09  | 0.146±0.046 | 0.198   | 2.63E-04 | 1.80E-08 | -0.273 |
| cg16592832 | 22 | 24891141  | UPB1      | TSS200           | Island  | 0.344±0.105 | 0.146±0.052 | 0.198   | 7.60E-04 | 1.03E-11 | -0.327 |
| cg14996810 | 12 | 121416501 | HNF1A     | 5'UTR/1st exon   | Island  | 0.555±0.134 | 0.357±0.074 | 0.198   | 3.47E-03 | 4.90E-24 | -0.470 |
| cg11669516 | 2  | 217501092 | IGFBP2    | 5'UTR/1st intron | S_Shelf | 0.651±0.142 | 0.454±0.273 | 0.198   | 2.37E-02 | 4.14E-30 | -0.521 |
| cg19324627 | 11 | 116708329 | APOA1     | 5'UTR/1st exon   | S_Shore | 0.454±0.123 | 0.257±0.058 | 0.198   | 2.18E-03 | 7.59E-06 | -0.219 |
| cg17084863 | 1  | 162530364 | UAP1      | TSS1500          | N_Shore | 0.506±0.114 | 0.309±0.117 | 0.197   | 1.26E-03 | 3.21E-11 | -0.319 |
| cg06246941 | 15 | 45671708  | GATM      | 5'UTR            | S_Shore | 0.706±0.1   | 0.508±0.183 | 0.197   | 1.76E-03 | 2.83E-22 | -0.453 |
| cg15049101 | 10 | 123353889 | GFR2      | 5'UTR/1st intron | N_Shelf | 0.517±0.15  | 0.319±0.196 | 0.197   | 1.20E-02 | 3.31E-06 | -0.227 |
| cg09573761 | 22 | 38219336  | GALR3     | TSS200           | N_Shore | 0.668±0.133 | 0.471±0.157 | 0.197   | 4.64E-03 | 4.97E-07 | -0.245 |
| cg19618279 | 17 | 40715228  | COASY     | 1st exon         | N_Shelf | 0.535±0.108 | 0.337±0.071 | 0.197   | 8.77E-04 | 1.31E-05 | -0.213 |
| cg03910196 | 16 | 2256384   | MLST8     | 5'UTR            | S_Shore | 0.526±0.084 | 0.328±0.113 | 0.197   | 1.12E-04 | 2.49E-05 | -0.206 |
| cg02711665 | 8  | 11664728  | FDFT1     | 5'UTR            | N_Shore | 0.684±0.131 | 0.487±0.174 | 0.197   | 5.20E-03 | 1.52E-22 | -0.456 |
| cg26841483 | 12 | 81332540  | LIN7A     | TSS1500          | S_Shore | 0.492±0.149 | 0.296±0.154 | 0.196   | 8.35E-03 | 8.37E-07 | -0.240 |
| cg15350036 | 7  | 86973677  | CROT      | TSS1500          | N_Shore | 0.575±0.148 | 0.379±0.218 | 0.196   | 1.47E-02 | 2.16E-08 | -0.271 |
| cg24324903 | 19 | 35629275  | FXYD1     | TSS1500          | N_Shelf | 0.649±0.089 | 0.453±0.125 | 0.196   | 2.19E-04 | 1.04E-14 | -0.369 |
| cg03305454 | 3  | 42843817  | HIGD1A    | 5'UTR/1st intron | N_Shore | 0.816±0.107 | 0.62±0.214  | 0.196   | 5.01E-03 | 1.72E-23 | -0.465 |
| cg17498424 | 22 | 42528123  | CYP2D6    | TSS1500          | S_Shelf | 0.761±0.057 | 0.565±0.138 | 0.196   | 3.06E-05 | 2.51E-12 | -0.336 |
| cg06483820 | 17 | 55167149  | AKAP1     | 5'UTR            | S_Shelf | 0.771±0.057 | 0.575±0.16  | 0.196   | 1.27E-04 | 2.23E-14 | -0.364 |
| cg13494428 | 1  | 19639494  | PQLC2     | 5'UTR            | S_Shore | 0.452±0.099 | 0.257±0.063 | 0.195   | 5.15E-04 | 2.23E-08 | -0.271 |
| cg13494428 | 1  | 19639494  | AKR7A2    | TSS1500          | S_Shore | 0.452±0.099 | 0.257±0.063 | 0.195   | 5.15E-04 | 3.99E-07 | -0.247 |
| cg02909320 | 3  | 45879990  | LZTF1     | 5'UTR            | N_Shelf | 0.762±0.072 | 0.567±0.223 | 0.195   | 2.82E-03 | 6.92E-07 | -0.242 |
| cg06653796 | 20 | 62367805  | LIME1     | 5'UTR/1st intron | N_Shore | 0.482±0.115 | 0.286±0.182 | 0.195   | 3.45E-03 | 1.45E-21 | -0.446 |
| cg10581876 | 1  | 205645246 | SLC45A3   | 5'UTR/1st intron | N_Shelf | 0.544±0.115 | 0.349±0.101 | 0.195   | 1.40E-03 | 1.25E-05 | -0.213 |
| cg25152404 | 1  | 225999183 | EPHX1     | 5'UTR/1st intron | S_Shore | 0.364±0.102 | 0.169±0.06  | 0.195   | 6.47E-04 | 1.06E-37 | -0.575 |
| cg05739419 | 12 | 53571394  | CSAD      | 5'UTR            | N_Shelf | 0.533±0.128 | 0.339±0.051 | 0.195   | 3.13E-03 | 1.70E-05 | -0.210 |
| cg08880849 | 17 | 40274728  | HSPB9     | TSS200           | Island  | 0.409±0.15  | 0.214±0.123 | 0.195   | 7.75E-03 | 7.81E-14 | -0.357 |
| cg13178361 | 1  | 162532502 | UAP1      | 5'UTR            | S_Shore | 0.378±0.127 | 0.183±0.076 | 0.195   | 2.80E-03 | 1.72E-08 | -0.273 |
| cg11787780 | 5  | 110844727 | STARD4    | 5'UTR/1st intron | N_Shelf | 0.609±0.148 | 0.415±0.162 | 0.195   | 8.98E-03 | 3.65E-07 | -0.247 |
| cg00345314 | 8  | 67624394  | SGK3      | TSS1500          | N_Shore | 0.305±0.132 | 0.11±0.045  | 0.195   | 3.91E-03 | 4.01E-12 | -0.333 |
| cg08898569 | 11 | 125760891 | HYLS1     | 5'UTR/1st intron | S_Shelf | 0.599±0.1   | 0.405±0.152 | 0.194   | 9.94E-04 | 1.05E-05 | -0.215 |
| cg05385434 | 1  | 225998870 | EPHX1     | 5'UTR/1st intron | S_Shore | 0.328±0.108 | 0.134±0.073 | 0.194   | 9.47E-04 | 2.28E-11 | -0.322 |
| cg17616192 | 17 | 80009015  | GPS1      | TSS1500          | N_Shelf | 0.543±0.167 | 0.35±0.116  | 0.193   | 1.39E-02 | 1.65E-05 | -0.210 |
| cg26688911 | 20 | 39969536  | LPIN3     | 1st exon         | S_Shore | 0.318±0.087 | 0.124±0.067 | 0.193   | 1.65E-04 | 9.46E-11 | -0.312 |
| cg04654716 | 5  | 74162924  | FAM169A   | TSS1500          | S_Shore | 0.488±0.114 | 0.294±0.085 | 0.193   | 1.35E-03 | 2.59E-18 | -0.412 |
| cg08596055 | 20 | 60722646  | SS18L1    | 5'UTR/1st intron | S_Shelf | 0.58±0.066  | 0.387±0.149 | 0.193   | 1.24E-04 | 1.83E-35 | -0.561 |
| cg14559422 | 1  | 26148138  | LOC646471 | 1st exon         | S_Shore | 0.579±0.147 | 0.386±0.104 | 0.193   | 6.98E-03 | 2.88E-05 | -0.205 |
| cg06928993 | 19 | 49313421  | BCAT2     | 5'UTR/1st intron | N_Shore | 0.578±0.106 | 0.385±0.197 | 0.193   | 3.60E-03 | 7.44E-11 | -0.314 |
| cg10613381 | 22 | 24890330  | UPB1      | TSS1500          | N_Shore | 0.445±0.111 | 0.252±0.051 | 0.193   | 1.38E-03 | 1.04E-11 | -0.327 |
| cg07816556 | 6  | 26017280  | HIST1H1A  | 1st exon/3'UTR   | N_Shelf | 0.444±0.14  | 0.251±0.2   | 0.193   | 1.09E-02 | 3.45E-11 | -0.319 |
| cg18924816 | 14 | 103388762 | AMN       | TSS1500          | N_Shore | 0.512±0.11  | 0.319±0.112 | 0.193   | 1.14E-03 | 1.42E-11 | -0.325 |
| cg17800870 | 1  | 182362757 | GLUL      | TSS1500          | S_Shore | 0.847±0.032 | 0.654±0.255 | 0.193   | 5.40E-03 | 7.65E-73 | -0.741 |
| cg13160251 | 15 | 56286575  | NEDD4     | TSS1500          | S_Shore | 0.333±0.123 | 0.14±0.071  | 0.193   | 2.46E-03 | 7.71E-08 | -0.261 |
| cg08764927 | 1  | 7844895   | PER3      | 5'UTR            | Island  | 0.556±0.109 | 0.364±0.148 | 0.193   | 1.59E-03 | 2.38E-16 | -0.389 |
| cg09037712 | 21 | 38362754  | HLCS      | TSS200           | Island  | 0.392±0.121 | 0.2±0.086   | 0.193   | 2.14E-03 | 1.85E-07 | -0.253 |
| cg19226017 | 6  | 35697185  | FKBP5     | TSS1500          | N_Shore | 0.695±0.079 | 0.502±0.163 | 0.193   | 4.75E-04 | 7.02E-08 | -0.262 |
| cg07359991 | 16 | 30995944  | HSD3B7    | TSS1500          | S_Shelf | 0.618±0.099 | 0.425±0.096 | 0.193   | 4.69E-04 | 1.03E-08 | -0.277 |
| cg24129600 | 8  | 42395557  | SLC20A2   | 5'UTR/1st intron | N_Shore | 0.421±0.166 | 0.228±0.084 | 0.193   | 1.34E-02 | 5.72E-14 | -0.359 |
| cg02157083 | 11 | 116662800 | APOA5     | 5'UTR/1st intron | S_Shelf | 0.696±0.044 | 0.503±0.181 | 0.192   | 3.73E-04 | 6.80E-38 | -0.577 |
| cg01434349 | 11 | 118900337 | SLC37A4   | 5'UTR            | N_Shore | 0.402±0.118 | 0.21±0.052  | 0.192   | 2.10E-03 | 1.79E-05 | -0.210 |
| cg04849878 | 5  | 176516112 | FGFR4     | 5'UTR/1st intron | S_Shore | 0.412±0.127 | 0.22±0.06   | 0.192   | 3.23E-03 | 1.27E-08 | -0.276 |
| cg17339327 | 6  | 31939025  | STK19     | 1st exon         | N_Shore | 0.516±0.136 | 0.325±0.107 | 0.192   | 4.69E-03 | 2.46E-06 | -0.230 |
| cg22332037 | 1  | 153951279 | JTB       | TSS1500          | S_Shore | 0.569±0.186 | 0.377±0.167 | 0.192   | 2.72E-02 | 1.20E-07 | -0.257 |
| cg11157127 | 6  | 143998869 | PHACTR2   | TSS1500          | N_Shore | 0.33±0.157  | 0.138±0.108 | 0.192   | 1.05E-02 | 2.60E-06 | -0.229 |
| cg16208084 | 17 | 40274703  | HSPB9     | TSS200           | Island  | 0.413±0.163 | 0.221±0.13  | 0.192   | 1.34E-02 | 3.03E-15 | -0.376 |
| cg06346081 | 1  | 42921584  | ZMYND12   | 1st exon         | N_Shore | 0.407±0.155 | 0.216±0.151 | 0.192   | 1.16E-02 | 5.33E-27 | -0.496 |
| cg15080939 | 6  | 30881560  | VAR52     | TSS1500          | Island  | 0.4±0.101   | 0.208±0.072 | 0.192   | 6.02E-04 | 4.11E-09 | -0.285 |
| cg25987102 | 11 | 116709735 | APOA1     | TSS1500          | S_Shelf | 0.547±0.159 | 0.355±0.109 | 0.192   | 1.13E-02 | 2.64E-05 | -0.205 |
| cg01620611 | 17 | 71306145  | CDC42EP4  | 5'UTR/1st intron | N_Shore | 0.332±0.095 | 0.141±0.048 | 0.191   | 4.85E-04 | 2.74E-10 | -0.305 |
| cg10749808 | 14 | 61746626  | TMEM30B   | 1st exon/3'UTR   | N_Shore | 0.423±0.084 | 0.231±0.051 | 0.191   | 1.85E-04 | 5.60E-09 | -0.282 |
| cg22650942 | 22 | 42527158  | CYP2D6    | TSS1500          | S_Shore | 0.441±0.081 | 0.25±0.051  | 0.191   | 1.22E-04 | 6.72E-11 | -0.314 |
| cg07815521 | 19 | 40789857  | AKT2      | 5'UTR/1st intron | N_Shore | 0.389±0.089 | 0.197±0.066 | 0.191   | 2.32E-04 | 1.64E-06 | -0.234 |
| cg08393516 | 4  | 987108    | SLC26A1   | 5'UTR/1st exon   | S_Shelf | 0.513±0.116 | 0.321±0.051 | 0.191   | 1.91E-03 | 6.41E-06 | -0.220 |
| cg20886011 | 2  | 165479150 | GRB14     | TSS1500          | S_Shore | 0.373±0.11  | 0.182±0.099 | 0.191   | 1.13E-03 | 7.47E-06 | -0.219 |
| cg03233793 | 19 | 19626605  | TSSK6     | TSS200           | Island  | 0.433±0.12  | 0.242±0.088 | 0.191   | 2.07E-03 | 1.83E-07 | -0.254 |
| cg21940220 | 17 | 76184081  | TK1       | TSS1500          | S_Shore | 0.412±0.087 | 0.221±0.059 | 0.191   | 2.18E-04 | 2.51E-07 | -0.251 |
| cg12433386 | 11 | 2722340   | KCNQ1OT1  | TSS1500          | S_Shore | 0.61±0.101  | 0.419±0.215 | 0.191   | 5.15E-03 | 1.18E-05 | -0.214 |
| cg24640065 | 1  | 234615370 | TARBP1    | TSS1500          | S_Shore | 0.614±0.054 | 0.424±0.174 | 0.191   | 3.29E-04 | 1.37E-08 | -0.275 |
| cg06038358 | 2  | 128176007 | PROC      | 5'UTR/1st exon   | S_Shelf | 0.538±0.104 | 0.347±0.066 | 0.191   | 8.15E-04 | 6.79E-10 | -0.298 |
| cg16260700 | 11 | 62414786  | GANAB     | TSS1500          | S_Shore | 0.523±0.126 | 0.332±0.112 | 0.191   | 3.09E-03 | 5.71E-06 | -0.221 |
| cg12639234 | 8  | 18248964  | NAT2      | 5'UTR/1st intron | S_Shelf | 0.559±0.124 | 0.369±0.071 | 0.190   | 2.78E-03 | 5.98E-12 | -0.330 |
| cg07576541 | 1  | 153630883 | SNAPIN    | TSS1500          | N_Shore | 0.732±0.126 | 0.542±0.243 | 0.190</ |          |          |        |

|            |    |           |          |                  |         |             |             |       |          |          |        |
|------------|----|-----------|----------|------------------|---------|-------------|-------------|-------|----------|----------|--------|
| cg15089314 | 5  | 78365255  | BHMT2    | TSS1500          | N_Shore | 0.318±0.096 | 0.128±0.076 | 0.190 | 4.35E-04 | 2.58E-19 | -0.423 |
| cg08331981 | 19 | 19626599  | TSSK6    | TSS200           | Island  | 0.504±0.115 | 0.314±0.11  | 0.190 | 1.65E-03 | 4.03E-08 | -0.266 |
| cg05454635 | 15 | 74657911  | CYP11A1  | 5'UTR/1st intron | N_Shore | 0.598±0.186 | 0.408±0.175 | 0.190 | 2.99E-02 | 1.40E-40 | -0.594 |
| cg23160522 | 15 | 75015787  | CYP1A1   | 5'UTR/1st intron | N_Shelf | 0.521±0.069 | 0.331±0.112 | 0.190 | 3.10E-05 | 2.87E-09 | -0.287 |
| cg09861583 | 2  | 238769419 | RAMP1    | 5'UTR/1st intron | S_Shore | 0.595±0.152 | 0.405±0.228 | 0.190 | 2.14E-02 | 4.79E-19 | -0.420 |
| cg20379919 | 3  | 184095940 | THPO     | 5'UTR            | N_Shelf | 0.429±0.107 | 0.239±0.045 | 0.190 | 1.21E-03 | 4.69E-22 | -0.451 |
| cg21189492 | 8  | 42395162  | SLC20A2  | 5'UTR/1st intron | N_Shore | 0.56±0.21   | 0.37±0.144  | 0.190 | 4.23E-02 | 3.94E-09 | -0.285 |
| cg13157778 | 17 | 202759    | RPH3AL   | TSS200           | N_Shelf | 0.43±0.123  | 0.241±0.076 | 0.190 | 2.61E-03 | 7.70E-06 | -0.218 |
| cg08736072 | 16 | 1471543   | C16orf91 | TSS1500          | S_Shore | 0.457±0.105 | 0.267±0.083 | 0.190 | 8.33E-04 | 5.67E-06 | -0.221 |
| cg18261909 | 6  | 30881571  | VARS2    | TSS1500          | Island  | 0.331±0.087 | 0.141±0.054 | 0.190 | 2.38E-04 | 1.52E-10 | -0.309 |
| cg14080585 | 20 | 60639721  | TAF4     | 1st exon         | Island  | 0.443±0.082 | 0.254±0.088 | 0.189 | 1.01E-04 | 1.76E-05 | -0.210 |
| cg24656529 | 4  | 17515119  | QDPR     | TSS1500          | S_Shore | 0.817±0.033 | 0.627±0.145 | 0.189 | 3.47E-05 | 2.95E-16 | -0.388 |
| cg11924019 | 15 | 75019283  | CYP1A1   | TSS1500          | Island  | 0.422±0.127 | 0.233±0.078 | 0.189 | 3.26E-03 | 2.22E-06 | -0.231 |
| cg14830003 | 1  | 38022657  | DNAL1    | 1st exon         | Island  | 0.647±0.139 | 0.458±0.24  | 0.189 | 1.95E-02 | 1.04E-28 | -0.510 |
| cg15664854 | 9  | 114362707 | PTGR1    | TSS1500          | S_Shore | 0.781±0.13  | 0.592±0.191 | 0.189 | 8.35E-03 | 2.64E-14 | -0.363 |
| cg03490567 | 7  | 43944817  | URGCP    | 5'UTR            | N_Shore | 0.304±0.078 | 0.115±0.041 | 0.189 | 1.26E-04 | 8.43E-06 | -0.217 |
| cg04185382 | 16 | 4424441   | VASN     | 5'UTR/1st intron | S_Shelf | 0.672±0.143 | 0.483±0.118 | 0.189 | 6.96E-03 | 3.06E-16 | -0.388 |
| cg00726046 | 20 | 43161260  | PKIG     | 5'UTR/1st intron | S_Shore | 0.388±0.098 | 0.2±0.081   | 0.189 | 5.29E-04 | 5.78E-10 | -0.299 |
| cg04091702 | 5  | 68711640  | MARVELD2 | 5'UTR/1st intron | S_Shore | 0.367±0.075 | 0.179±0.057 | 0.189 | 6.02E-05 | 6.41E-08 | -0.262 |
| cg03173570 | 21 | 33031392  | SOD1     | TSS1500          | N_Shore | 0.306±0.104 | 0.117±0.055 | 0.189 | 9.63E-04 | 8.65E-14 | -0.356 |
| cg15715507 | 5  | 140053663 | DND1     | TSS1500          | S_Shore | 0.594±0.101 | 0.405±0.119 | 0.188 | 8.00E-04 | 6.23E-08 | -0.263 |
| cg00466249 | 17 | 79269884  | SLC38A10 | TSS1500          | S_Shore | 0.432±0.126 | 0.244±0.074 | 0.188 | 3.38E-03 | 1.65E-08 | -0.274 |
| cg02210151 | 10 | 123356041 | FGFR2    | 5'UTR/1st exon   | N_Shore | 0.553±0.156 | 0.365±0.154 | 0.188 | 1.35E-02 | 7.31E-21 | -0.439 |
| cg07551677 | 8  | 28570561  | EXTL3    | 5'UTR/1st intron | N_Shelf | 0.859±0.035 | 0.671±0.215 | 0.188 | 1.88E-03 | 1.01E-06 | -0.238 |
| cg00540067 | 3  | 126074344 | KLF15    | 5'UTR/1st intron | N_Shore | 0.428±0.095 | 0.24±0.056  | 0.188 | 5.18E-04 | 4.17E-27 | -0.497 |
| cg14010829 | 9  | 133322940 | ASS1     | 5'UTR/1st intron | S_Shelf | 0.743±0.125 | 0.555±0.155 | 0.188 | 4.57E-03 | 8.02E-22 | -0.449 |
| cg16550453 | 10 | 115939018 | TDRO1    | TSS200           | Island  | 0.881±0.098 | 0.693±0.232 | 0.188 | 7.82E-03 | 5.97E-15 | -0.372 |
| cg13771161 | 9  | 99146400  | SLC35D2  | TSS1500          | S_Shore | 0.379±0.131 | 0.192±0.057 | 0.187 | 4.33E-03 | 1.37E-09 | -0.293 |
| cg26646411 | 22 | 19841374  | GNB1L    | 5'UTR            | N_Shore | 0.349±0.107 | 0.162±0.071 | 0.187 | 1.16E-03 | 7.46E-06 | -0.219 |
| cg03886898 | 1  | 54359132  | DIO1     | TSS1500          | S_Shelf | 0.697±0.107 | 0.51±0.138  | 0.187 | 1.54E-03 | 3.64E-30 | -0.522 |
| cg02369725 | 2  | 178936951 | PDE11A   | 1st exon         | N_Shore | 0.43±0.112  | 0.243±0.097 | 0.187 | 1.56E-03 | 2.32E-08 | -0.271 |
| cg18500085 | 11 | 45827628  | SLC35C1  | 1st exon         | S_Shore | 0.475±0.104 | 0.288±0.065 | 0.187 | 9.82E-04 | 2.50E-06 | -0.230 |
| cg06374185 | 3  | 45637480  | LIMD1    | 1st exon         | S_Shore | 0.329±0.1   | 0.142±0.059 | 0.187 | 7.81E-04 | 4.57E-11 | -0.317 |
| cg08932654 | 17 | 38084459  | ORMDL3   | TSS1500          | S_Shore | 0.379±0.115 | 0.192±0.056 | 0.187 | 2.04E-03 | 8.82E-09 | -0.279 |
| cg03566191 | 14 | 68067294  | PIGH     | TSS1500          | S_Shore | 0.601±0.13  | 0.414±0.156 | 0.187 | 5.87E-03 | 8.55E-06 | -0.217 |
| cg03766851 | 2  | 47141740  | MCFD2    | 5'UTR/1st intron | N_Shore | 0.537±0.155 | 0.35±0.112  | 0.187 | 1.12E-02 | 5.97E-09 | -0.282 |
| cg03606774 | 2  | 27432830  | SLC5A6   | 5'UTR            | N_Shore | 0.574±0.09  | 0.387±0.183 | 0.186 | 1.94E-03 | 2.03E-08 | -0.272 |
| cg14162906 | 1  | 27647606  | TMEM222  | TSS1500          | N_Shore | 0.562±0.087 | 0.376±0.136 | 0.186 | 4.39E-04 | 5.03E-06 | -0.223 |
| cg09341580 | 22 | 38218159  | GALR3    | TSS1500          | N_Shelf | 0.301±0.09  | 0.115±0.049 | 0.186 | 3.84E-04 | 2.40E-06 | -0.230 |
| cg03419014 | 21 | 38362742  | HLCS     | TSS200           | Island  | 0.353±0.12  | 0.167±0.056 | 0.186 | 2.78E-03 | 6.90E-06 | -0.220 |
| cg26178184 | 16 | 67232921  | ELMO3    | TSS200           | N_Shore | 0.613±0.11  | 0.427±0.175 | 0.186 | 3.60E-03 | 1.02E-16 | -0.394 |
| cg07217063 | 22 | 30901886  | SEC14L4  | TSS200           | S_Shore | 0.466±0.103 | 0.28±0.057  | 0.186 | 1.01E-03 | 6.57E-07 | -0.242 |
| cg14525897 | 10 | 99053150  | ARHGAP19 | TSS1500          | S_Shore | 0.591±0.163 | 0.405±0.162 | 0.186 | 1.79E-02 | 1.39E-05 | -0.212 |
| cg13306335 | 1  | 2345376   | PEX10    | TSS1500          | S_Shore | 0.482±0.101 | 0.296±0.053 | 0.186 | 8.69E-04 | 1.81E-07 | -0.254 |
| cg26266876 | 3  | 23957486  | NKIRAS1  | 5'UTR/1st intron | N_Shore | 0.3±0.115   | 0.114±0.057 | 0.186 | 2.09E-03 | 3.04E-17 | -0.400 |
| cg25484139 | 3  | 13008273  | IQSEC1   | 5'UTR/1st intron | N_Shore | 0.298±0.099 | 0.112±0.04  | 0.186 | 8.71E-04 | 7.55E-06 | -0.219 |
| cg18328933 | 3  | 52008538  | ABHD14B  | 5'UTR/1st exon   | S_Shore | 0.48±0.083  | 0.295±0.093 | 0.186 | 1.29E-04 | 1.73E-10 | -0.308 |
| cg18328933 | 3  | 52008538  | ABHD14A  | TSS1500          | S_Shore | 0.48±0.083  | 0.295±0.093 | 0.186 | 1.29E-04 | 8.38E-06 | -0.218 |
| cg24810305 | 14 | 103389022 | AMN      | 5'UTR/1st exon   | Island  | 0.397±0.084 | 0.211±0.062 | 0.186 | 1.88E-04 | 8.56E-07 | -0.240 |
| cg00273124 | 5  | 17758152  | NHP2     | TSS1500          | S_Shore | 0.493±0.119 | 0.307±0.096 | 0.186 | 2.41E-03 | 2.31E-08 | -0.271 |
| cg18981338 | 14 | 24422419  | DHRS4    | TSS1500          | N_Shore | 0.338±0.101 | 0.152±0.04  | 0.185 | 9.99E-04 | 2.49E-09 | -0.288 |
| cg11813387 | 5  | 43310340  | HMGCS1   | 5'UTR/1st intron | N_Shelf | 0.766±0.089 | 0.581±0.216 | 0.185 | 4.87E-03 | 4.15E-38 | -0.578 |
| cg10033675 | 2  | 172015098 | TLK1     | 5'UTR/1st intron | N_Shore | 0.363±0.105 | 0.178±0.072 | 0.185 | 1.05E-03 | 7.89E-08 | -0.261 |
| cg03861785 | 16 | 1873952   | HAGH     | 5'UTR            | N_Shelf | 0.413±0.121 | 0.228±0.079 | 0.185 | 2.76E-03 | 1.49E-20 | -0.436 |
| cg00446123 | 20 | 62367888  | LIME1    | 5'UTR/1st exon   | N_Shore | 0.625±0.143 | 0.439±0.306 | 0.185 | 4.59E-02 | 1.27E-23 | -0.466 |
| cg08727202 | 22 | 37414747  | MPST     | TSS1500          | Island  | 0.441±0.057 | 0.256±0.076 | 0.185 | 2.05E-06 | 7.02E-06 | -0.219 |
| cg17854654 | 1  | 155232925 | SCAMP3   | TSS1500          | S_Shore | 0.566±0.105 | 0.381±0.151 | 0.185 | 1.89E-03 | 6.03E-06 | -0.221 |
| cg19636672 | 12 | 56881121  | GLS2     | 5'UTR/1st intron | N_Shore | 0.404±0.129 | 0.219±0.082 | 0.185 | 4.15E-03 | 1.10E-09 | -0.294 |
| cg16836675 | 17 | 52981853  | TOM1L1   | 5'UTR            | S_Shelf | 0.365±0.188 | 0.18±0.121  | 0.185 | 2.88E-02 | 5.10E-14 | -0.360 |
| cg02153339 | 12 | 121415499 | HNF1A    | TSS1500          | N_Shore | 0.464±0.14  | 0.279±0.125 | 0.185 | 7.27E-03 | 4.31E-19 | -0.421 |
| cg18702012 | 10 | 126106555 | OAT      | 5'UTR/1st intron | N_Shore | 0.44±0.125  | 0.255±0.109 | 0.185 | 3.47E-03 | 3.11E-05 | -0.204 |
| cg04361266 | 16 | 20910376  | DCUN1D3  | 5'UTR/1st intron | N_Shore | 0.745±0.089 | 0.56±0.153  | 0.185 | 8.42E-04 | 1.21E-10 | -0.310 |
| cg04361266 | 16 | 20910376  | LYRM1    | TSS1500          | N_Shore | 0.745±0.089 | 0.56±0.153  | 0.185 | 8.42E-04 | 7.81E-10 | -0.297 |
| cg12861503 | 13 | 52734071  | NEK3     | TSS1500          | S_Shore | 0.319±0.099 | 0.135±0.06  | 0.185 | 7.65E-04 | 1.39E-11 | -0.325 |
| cg21296602 | 11 | 93476060  | C11orf54 | 5'UTR            | S_Shore | 0.618±0.194 | 0.433±0.186 | 0.185 | 4.07E-02 | 1.27E-07 | -0.257 |
| cg26039042 | 8  | 144815275 | FAM83H   | 5'UTR/1st intron | Island  | 0.456±0.091 | 0.272±0.069 | 0.185 | 3.76E-04 | 3.50E-13 | -0.348 |
| cg23772843 | 13 | 113759909 | F7       | TSS200           | N_Shore | 0.418±0.091 | 0.233±0.06  | 0.185 | 3.94E-04 | 1.76E-15 | -0.378 |
| cg08511651 | 6  | 26017619  | HIST1H1A | 1st exon         | N_Shelf | 0.412±0.19  | 0.228±0.198 | 0.185 | 4.03E-02 | 6.56E-12 | -0.330 |
| cg12974394 | 1  | 150522266 | ADAMTSL4 | 5'UTR/1st intron | Island  | 0.362±0.1   | 0.178±0.068 | 0.184 | 7.63E-04 | 6.24E-07 | -0.243 |
| cg07042338 | 17 | 26990202  | SDF2     | TSS1500          | S_Shore | 0.41±0.138  | 0.226±0.115 | 0.184 | 6.63E-03 | 1.46E-07 | -0.255 |
| cg07042338 | 17 | 26990202  | SUP76H   | 5'UTR/1st intron | S_Shore | 0.41±0.138  | 0.226±0.115 | 0.184 | 6.63E-03 | 1.80E-05 | -0.210 |
| cg08794763 | 19 | 2977843   | TLE6     | 5'UTR/1st intron | S_Shore | 0.48±0.153  | 0.296±0.131 | 0.184 | 1.23E-02 | 1.24E-11 | -0.326 |
| cg06979924 | 1  | 155277503 | FDP5     | TSS1500          | N_Shore | 0.441±0.158 | 0.257±0.089 | 0.184 | 1.29E-02 | 1.13E-07 | -0.258 |
| cg27389255 | 11 | 14664598  | PDE3B    | TSS1500          | N_Shore | 0.553±0.132 | 0.369±0.086 | 0.184 | 4.80E-03 | 1.02E-05 | -0.215 |
| cg18149919 | 8  | 144912049 | PUF60    | TSS1500          | Island  | 0.585±0.136 | 0.402±0.092 | 0.184 | 5.85E-03 | 8.03E-17 | -0.395 |
| cg05318361 | 4  | 1166839   | SPON2    | 5'UTR            | S_Shore | 0.447±0.111 | 0.263±0.066 | 0.184 | 1.69E-03 | 2.25E-06 | -0.231 |
| cg04162118 | 8  | 71519030  | TRAM1    | 5'UTR/1st intron | N_Shore | 0.571±0.186 | 0.388±0.171 | 0.184 | 3.37E-02 | 1.99E-14 | -0.365 |
| cg11001769 | 14 | 61748440  | TMEM30B  | 5'UTR/1st exon   | S_Shore | 0.642±0.163 | 0.458±0.196 | 0.184 | 2.40E-02 | 3.72E-20 | -0.432 |
| cg01849085 | 7  | 63505811  | ZNF727   | 5'UTR/1st exon   | N_Shore | 0.281±0.17  | 0.097±0.046 | 0.184 | 1.81E-02 | 8.34E-06 | -0.218 |
| cg01854491 | 8  | 144815021 | FAM83H   | 5'UTR/1st intron | N_Shore | 0.378±0.17  | 0.195±0.122 | 0.184 | 1.97E-02 | 2.76E-15 | -0.376 |
| cg07626033 | 3  | 11036898  | SLC6A1   | 5'UTR/1st intron | S_Shore | 0.484±0.14  | 0.301±0.156 | 0.183 | 9.48E-03 | 6.63E-25 | -0.478 |
| cg07593177 | 11 | 6501850   | ARFIP2   | 5'UTR/1st intron | N_Shore | 0.599±0.176 | 0.416±0.17  | 0.183 | 2.77E-02 | 4.32E-10 | -0.301 |
| cg15078669 | 8  | 88884985  | DCAF4L2  | 1st exon/3'UTR   | N_Shore | 0.433±0.073 | 0.25±0.06   | 0.183 | 5.91E-05 | 1.49E-06 | -0.234 |
| cg07097417 | 1  | 212002770 | LPGAT1   | 5'UTR/1st intron | N_Shore | 0.33±0.1    | 0.147±0.06  | 0.183 | 8.48E-04 | 5.68E-07 | -0.243 |
| cg04964333 | 20 | 39969604  | LPIN3    | 1st exon         | S_Shore | 0.485±0.091 | 0.302±0.072 | 0.183 | 3.73E-04 | 2.14E-18 | -0.413 |
| cg05211342 | 19 | 49890915  | CCDC155  | TSS1500          | N_Shore | 0.659±0.118 | 0.476±0.187 | 0.183 | 6.65E-03 | 8.64E-09 | -0.279 |
| cg04648402 | 4  | 987561    | SLC26A1  | TSS1500          | S_Shelf | 0.521±0.108 | 0.338±0.051 |       |          |          |        |

|            |    |           |                   |                  |         |             |             |       |          |          |        |
|------------|----|-----------|-------------------|------------------|---------|-------------|-------------|-------|----------|----------|--------|
| cg27344791 | 19 | 12145947  | <i>ZNF433</i>     | 5'UTR/1st intron | N_Shore | 0.302±0.132 | 0.12±0.056  | 0.183 | 5.26E-03 | 7.49E-17 | -0.395 |
| cg11084470 | 6  | 35108061  | <i>TCP11</i>      | 5'UTR            | N_Shore | 0.417±0.108 | 0.234±0.105 | 0.182 | 1.44E-03 | 2.18E-05 | -0.208 |
| cg22399646 | 2  | 242750705 | <i>NEU4</i>       | 5'UTR/1st intron | N_Shelf | 0.524±0.18  | 0.342±0.171 | 0.182 | 3.06E-02 | 4.67E-30 | -0.521 |
| cg10377144 | 10 | 89419177  | <i>PAPSS2</i>     | TSS1500          | N_Shore | 0.505±0.135 | 0.323±0.157 | 0.182 | 8.40E-03 | 4.00E-17 | -0.398 |
| cg21854895 | 17 | 71305638  | <i>CDC42EP4</i>   | 5'UTR/1st intron | N_Shore | 0.565±0.164 | 0.383±0.179 | 0.182 | 2.30E-02 | 2.52E-10 | -0.305 |
| cg04859918 | 10 | 71893017  | <i>AIFM2</i>      | TSS1500          | S_Shore | 0.486±0.103 | 0.304±0.137 | 0.182 | 1.53E-03 | 1.40E-05 | -0.212 |
| cg07168142 | 17 | 40274740  | <i>HSPB9</i>      | TSS200           | Island  | 0.511±0.147 | 0.329±0.122 | 0.182 | 1.03E-02 | 2.40E-15 | -0.377 |
| cg22785629 | 17 | 1554549   | <i>RILP</i>       | TSS1500          | S_Shore | 0.651±0.102 | 0.469±0.151 | 0.182 | 1.87E-03 | 1.67E-06 | -0.233 |
| cg18138826 | 6  | 44354646  | <i>CDC5L</i>      | TSS1500          | N_Shore | 0.417±0.124 | 0.235±0.15  | 0.182 | 5.17E-03 | 5.90E-12 | -0.330 |
| cg06182359 | 1  | 161088957 | <i>PFDN2</i>      | TSS1500          | S_Shore | 0.335±0.109 | 0.154±0.075 | 0.182 | 1.53E-03 | 2.58E-05 | -0.206 |
| cg04084026 | 16 | 57832309  | <i>KIFC3</i>      | 5'UTR/1st intron | N_Shelf | 0.62±0.121  | 0.438±0.118 | 0.182 | 3.42E-03 | 4.30E-05 | -0.200 |
| cg00727310 | 2  | 227662704 | <i>IRS1</i>       | 1st exon         | Island  | 0.501±0.126 | 0.32±0.071  | 0.182 | 4.11E-03 | 5.32E-09 | -0.283 |
| cg10085305 | 17 | 77704942  | <i>ENPP7</i>      | 1st exon         | N_Shelf | 0.565±0.142 | 0.383±0.077 | 0.182 | 7.89E-03 | 1.83E-16 | -0.391 |
| cg25464235 | 13 | 93878289  | <i>GPC6</i>       | TSS1500          | N_Shore | 0.524±0.147 | 0.342±0.119 | 0.182 | 1.04E-02 | 2.16E-11 | -0.322 |
| cg07546654 | 11 | 1320546   | <i>TOLLIP</i>     | 5'UTR/1st intron | S_Shelf | 0.371±0.15  | 0.19±0.063  | 0.181 | 1.09E-02 | 4.89E-06 | -0.223 |
| cg06460691 | 5  | 74162851  | <i>FAM169A</i>    | TSS1500          | S_Shore | 0.445±0.102 | 0.264±0.113 | 0.181 | 1.06E-03 | 7.92E-20 | -0.428 |
| cg18288193 | 5  | 180233833 | <i>MGAT1</i>      | 5'UTR            | N_Shelf | 0.417±0.103 | 0.236±0.087 | 0.181 | 1.05E-03 | 2.96E-07 | -0.249 |
| cg07800524 | 19 | 49259452  | <i>FGF21</i>      | 5'UTR            | S_Shelf | 0.509±0.114 | 0.328±0.103 | 0.181 | 2.20E-03 | 1.69E-11 | -0.324 |
| cg13104938 | 11 | 843956    | <i>TSPAN4</i>     | 5'UTR/1st intron | S_Shore | 0.353±0.127 | 0.172±0.132 | 0.181 | 5.11E-03 | 1.43E-14 | -0.367 |
| cg16545821 | 1  | 204118840 | <i>ETNK2</i>      | 5'UTR/1st intron | N_Shore | 0.785±0.079 | 0.604±0.223 | 0.181 | 5.77E-03 | 4.76E-40 | -0.590 |
| cg24725692 | 4  | 140478735 | <i>SETD7</i>      | TSS1500          | S_Shore | 0.324±0.094 | 0.143±0.039 | 0.181 | 7.51E-04 | 3.50E-06 | -0.226 |
| cg20640261 | 6  | 31707019  | <i>MSH5</i>       | TSS1500          | N_Shore | 0.325±0.102 | 0.144±0.045 | 0.181 | 1.25E-03 | 3.34E-20 | -0.433 |
| cg13500113 | 2  | 216947149 | <i>TMEM169</i>    | 5'UTR            | S_Shore | 0.496±0.119 | 0.315±0.109 | 0.181 | 2.99E-03 | 2.07E-17 | -0.402 |
| cg13500113 | 2  | 216947149 | <i>PECR</i>       | TSS1500          | S_Shore | 0.496±0.119 | 0.315±0.109 | 0.181 | 2.99E-03 | 1.01E-10 | -0.312 |
| cg01878807 | 14 | 24422368  | <i>DHRS4</i>      | TSS1500          | N_Shore | 0.393±0.135 | 0.212±0.083 | 0.181 | 6.14E-03 | 5.87E-16 | -0.384 |
| cg15546227 | 1  | 61546247  | <i>NFIA</i>       | TSS1500          | N_Shelf | 0.342±0.115 | 0.161±0.06  | 0.181 | 2.42E-03 | 1.41E-17 | -0.404 |
| cg14186992 | 1  | 6639570   | <i>ZBTB48</i>     | TSS1500          | Island  | 0.486±0.137 | 0.306±0.072 | 0.181 | 6.86E-03 | 1.39E-09 | -0.293 |
| cg17886959 | 16 | 56642024  | <i>MT2A</i>       | TSS1500          | N_Shore | 0.377±0.086 | 0.197±0.086 | 0.181 | 2.36E-04 | 4.19E-09 | -0.284 |
| cg19258882 | 12 | 56472805  | <i>ERBB3</i>      | TSS1500          | Island  | 0.337±0.1   | 0.156±0.064 | 0.181 | 9.27E-04 | 3.97E-10 | -0.302 |
| cg01054354 | 15 | 100272751 | <i>LYSMD4</i>     | 5'UTR            | N_Shore | 0.38±0.125  | 0.199±0.082 | 0.181 | 3.99E-03 | 9.96E-08 | -0.259 |
| cg11243029 | 1  | 85929755  | <i>DDAH1</i>      | 5'UTR            | N_Shore | 0.335±0.085 | 0.154±0.044 | 0.180 | 3.54E-04 | 7.33E-06 | -0.219 |
| cg09710316 | 3  | 170744871 | <i>SLC2A2</i>     | TSS200           | N_Shore | 0.418±0.105 | 0.238±0.056 | 0.180 | 1.42E-03 | 1.23E-10 | -0.310 |
| cg02654291 | 9  | 86572014  | <i>C9orf64</i>    | TSS1500          | Island  | 0.384±0.101 | 0.203±0.052 | 0.180 | 1.14E-03 | 1.37E-12 | -0.340 |
| cg09102447 | 8  | 57907138  | <i>IMPAD1</i>     | TSS1500          | S_Shore | 0.31±0.093  | 0.13±0.076  | 0.180 | 4.85E-04 | 3.06E-08 | -0.269 |
| cg08530484 | 2  | 220024606 | <i>NHEJ1</i>      | 5'UTR/1st intron | N_Shore | 0.345±0.1   | 0.164±0.062 | 0.180 | 9.54E-04 | 5.23E-08 | -0.264 |
| cg11865601 | 6  | 24491317  | <i>GPLD1</i>      | TSS1500          | N_Shelf | 0.859±0.059 | 0.679±0.211 | 0.180 | 2.97E-03 | 4.35E-25 | -0.480 |
| cg12127991 | 1  | 228870637 | <i>RHOJ</i>       | TSS200           | N_Shore | 0.35±0.098  | 0.17±0.114  | 0.180 | 8.77E-04 | 6.45E-14 | -0.358 |
| cg05399544 | 14 | 74481427  | <i>ENTPD5</i>     | 5'UTR            | N_Shelf | 0.647±0.12  | 0.467±0.173 | 0.180 | 6.36E-03 | 2.84E-06 | -0.228 |
| cg07994485 | 2  | 97652440  | <i>FAM178B</i>    | TSS200           | Island  | 0.793±0.121 | 0.613±0.237 | 0.180 | 1.75E-02 | 4.21E-22 | -0.452 |
| cg18222865 | 11 | 14664689  | <i>PDE3B</i>      | TSS1500          | N_Shore | 0.435±0.102 | 0.255±0.061 | 0.180 | 1.15E-03 | 1.81E-07 | -0.254 |
| cg00912149 | 17 | 74449810  | <i>UBE2O</i>      | TSS1500          | S_Shore | 0.305±0.072 | 0.125±0.05  | 0.180 | 7.18E-05 | 7.16E-13 | -0.344 |
| cg02985694 | 4  | 123300456 | <i>ADAD1</i>      | 5'UTR/1st intron | Island  | 0.787±0.08  | 0.607±0.204 | 0.179 | 3.65E-03 | 1.95E-05 | -0.209 |
| cg24724917 | 11 | 2925439   | <i>SLC22A18A5</i> | TSS1500          | S_Shore | 0.534±0.156 | 0.354±0.126 | 0.179 | 1.50E-02 | 4.52E-19 | -0.420 |
| cg14115346 | 6  | 3118207   | <i>BPHL</i>       | TSS1500          | N_Shore | 0.343±0.088 | 0.164±0.067 | 0.179 | 3.48E-04 | 4.82E-08 | -0.265 |
| cg07555437 | 20 | 45279830  | <i>SLC13A3</i>    | 5'UTR            | Island  | 0.531±0.127 | 0.352±0.129 | 0.179 | 5.46E-03 | 4.79E-11 | -0.317 |
| cg04315771 | 19 | 50433949  | <i>ATF5</i>       | 5'UTR            | S_Shore | 0.539±0.123 | 0.36±0.255  | 0.179 | 2.38E-02 | 1.74E-28 | -0.509 |
| cg25114611 | 6  | 35696870  | <i>FKBP5</i>      | TSS1500          | N_Shelf | 0.424±0.11  | 0.245±0.078 | 0.179 | 1.83E-03 | 2.79E-11 | -0.320 |
| cg14738273 | 3  | 126074601 | <i>KLF15</i>      | 5'UTR/1st intron | N_Shore | 0.369±0.102 | 0.19±0.055  | 0.179 | 1.24E-03 | 6.73E-17 | -0.396 |
| cg12188860 | 8  | 144416485 | <i>TOP1MT</i>     | 5'UTR            | N_Shore | 0.51±0.124  | 0.33±0.069  | 0.179 | 4.00E-03 | 1.13E-05 | -0.214 |
| cg17781925 | 3  | 49726151  | <i>RNF123</i>     | TSS1500          | S_Shore | 0.463±0.096 | 0.284±0.059 | 0.179 | 7.56E-04 | 9.86E-08 | -0.259 |
| cg17781925 | 3  | 49726151  | <i>MST1</i>       | 1st exon         | S_Shore | 0.463±0.096 | 0.284±0.059 | 0.179 | 7.56E-04 | 1.50E-06 | -0.234 |
| cg22691587 | 1  | 40349894  | <i>TRIT1</i>      | TSS1500          | S_Shore | 0.571±0.139 | 0.392±0.125 | 0.179 | 8.52E-03 | 4.63E-06 | -0.224 |
| cg26934993 | 17 | 40274722  | <i>HSPB9</i>      | TSS200           | Island  | 0.484±0.155 | 0.305±0.116 | 0.179 | 1.41E-02 | 4.71E-16 | -0.386 |
| cg00533390 | 1  | 245028657 | <i>HNRNPJ</i>     | TSS1500          | S_Shore | 0.396±0.118 | 0.217±0.129 | 0.179 | 3.52E-03 | 1.86E-05 | -0.209 |
| cg01621080 | 16 | 28608125  | <i>SULT1A2</i>    | 5'UTR/1st intron | N_Shelf | 0.507±0.126 | 0.328±0.094 | 0.179 | 4.41E-03 | 3.55E-14 | -0.362 |
| cg08181251 | 10 | 99443455  | <i>AVP1</i>       | 5'UTR/1st intron | N_Shelf | 0.459±0.084 | 0.28±0.101  | 0.179 | 2.37E-04 | 8.84E-22 | -0.448 |
| cg20067780 | 17 | 78008520  | <i>TBC1D16</i>    | 5'UTR/1st intron | N_Shore | 0.459±0.165 | 0.281±0.174 | 0.179 | 2.49E-02 | 2.07E-20 | -0.435 |
| cg11935638 | 3  | 184972145 | <i>EHHADH</i>     | TSS1500          | S_Shore | 0.318±0.099 | 0.14±0.086  | 0.179 | 8.45E-04 | 6.80E-07 | -0.242 |
| cg12727940 | 3  | 145969718 | <i>PLSCR4</i>     | TSS1500          | S_Shore | 0.674±0.076 | 0.495±0.205 | 0.178 | 3.57E-03 | 2.04E-11 | -0.322 |
| cg24892871 | 19 | 10611043  | <i>KEAP1</i>      | 5'UTR/1st intron | N_Shelf | 0.603±0.083 | 0.424±0.143 | 0.178 | 6.20E-04 | 1.08E-06 | -0.237 |
| cg24670552 | 13 | 110436780 | <i>IRS2</i>       | 1st exon         | Island  | 0.563±0.129 | 0.385±0.183 | 0.178 | 1.05E-02 | 5.00E-09 | -0.283 |
| cg01617750 | 3  | 32279261  | <i>CMTM8</i>      | TSS1500          | N_Shore | 0.364±0.094 | 0.186±0.061 | 0.178 | 6.47E-04 | 2.16E-19 | -0.424 |
| cg15393702 | 18 | 21243529  | <i>ANKRD29</i>    | TSS1500          | S_Shore | 0.338±0.123 | 0.16±0.118  | 0.178 | 4.31E-03 | 8.24E-07 | -0.240 |
| cg06998765 | 14 | 75389618  | <i>PSP6KL1</i>    | TSS1500          | N_Shore | 0.485±0.097 | 0.306±0.127 | 0.178 | 1.04E-03 | 5.11E-29 | -0.513 |
| cg25886479 | 11 | 50257625  | <i>LOC441601</i>  | 1st exon         | Island  | 0.655±0.13  | 0.477±0.202 | 0.178 | 1.38E-02 | 1.75E-13 | -0.352 |
| cg08234618 | 3  | 133464842 | <i>TF</i>         | 5'UTR            | N_Shore | 0.356±0.096 | 0.179±0.047 | 0.178 | 8.61E-04 | 5.61E-10 | -0.299 |
| cg20310100 | 11 | 68081207  | <i>LRP5</i>       | 5'UTR/1st intron | S_Shore | 0.395±0.139 | 0.217±0.094 | 0.178 | 8.27E-03 | 2.76E-07 | -0.250 |
| cg20113012 | 17 | 71308660  | <i>CDC42EP4</i>   | TSS1500          | Island  | 0.253±0.101 | 0.076±0.045 | 0.178 | 1.30E-03 | 7.89E-09 | -0.279 |
| cg07702888 | 1  | 156338793 | <i>RHBG</i>       | TSS200           | Island  | 0.41±0.08   | 0.233±0.074 | 0.177 | 1.50E-04 | 3.51E-07 | -0.248 |
| cg25325446 | 5  | 139938201 | <i>SRA1</i>       | TSS1500          | S_Shore | 0.872±0.029 | 0.695±0.153 | 0.177 | 1.36E-04 | 9.27E-11 | -0.312 |
| cg14398963 | 11 | 2397538   | <i>CD81</i>       | 5'UTR/1st exon   | N_Shore | 0.511±0.124 | 0.334±0.146 | 0.177 | 6.00E-03 | 5.67E-07 | -0.243 |
| cg04716394 | 14 | 74318162  | <i>PTGR2</i>      | TSS1500          | N_Shore | 0.339±0.085 | 0.163±0.057 | 0.177 | 3.37E-04 | 1.57E-11 | -0.324 |
| cg07959978 | 1  | 65994091  | <i>LEPR</i>       | 5'UTR            | S_Shelf | 0.642±0.097 | 0.466±0.17  | 0.177 | 2.84E-03 | 9.84E-17 | -0.394 |
| cg09430445 | 3  | 42918546  | <i>CYP8B1</i>     | TSS1500          | N_Shelf | 0.536±0.138 | 0.36±0.184  | 0.176 | 1.48E-02 | 4.62E-23 | -0.461 |
| cg09557462 | 8  | 26721736  | <i>ADRA1A</i>     | 1st exon         | Island  | 0.38±0.13   | 0.203±0.121 | 0.176 | 6.50E-03 | 3.35E-22 | -0.453 |
| cg03512692 | 22 | 44350088  | <i>SAMM50</i>     | TSS1500          | N_Shore | 0.531±0.081 | 0.356±0.137 | 0.176 | 5.22E-04 | 9.26E-06 | -0.217 |
| cg24772525 | 2  | 172014861 | <i>TLK1</i>       | 5'UTR/1st intron | N_Shore | 0.636±0.135 | 0.461±0.181 | 0.176 | 1.33E-02 | 1.27E-09 | -0.293 |
| cg06872514 | 9  | 139746715 | <i>MAMDC4</i>     | TSS200           | S_Shelf | 0.517±0.112 | 0.341±0.123 | 0.176 | 2.83E-03 | 1.80E-08 | -0.273 |
| cg16529268 | 19 | 45281284  | <i>CBLC</i>       | 1st exon         | Island  | 0.257±0.098 | 0.082±0.049 | 0.176 | 1.13E-03 | 6.38E-10 | -0.298 |
| cg12230883 | 3  | 184035527 | <i>EIF4G1</i>     | 5'UTR            | S_Shelf | 0.681±0.165 | 0.505±0.157 | 0.176 | 2.45E-02 | 6.12E-12 | -0.330 |
| cg07148318 | 8  | 145115260 | <i>OPLAH</i>      | 5'UTR/1st intron | S_Shore | 0.571±0.126 | 0.395±0.084 | 0.175 | 4.85E-03 | 3.35E-11 | -0.319 |
| cg09419900 | 10 | 124739466 | <i>PSTK</i>       | TSS200           | N_Shore | 0.312±0.07  | 0.137±0.043 | 0.175 | 8.56E-05 | 6.51E-09 | -0.281 |
| cg08736216 | 1  | 53307985  | <i>ZYG11A</i>     | TSS200           | N_Shore | 0.604±0.084 | 0.429±0.159 | 0.175 | 1.32E-03 | 2.49E-27 | -0.499 |
| cg05151185 | 11 | 45827271  | <i>SLC35C1</i>    | 5'UTR/1st exon   | S_Shore | 0.319±0.085 | 0.144±0.052 | 0.175 | 3.62E-04 | 3.86E-05 | -0.201 |
| cg03486974 | 16 | 2199702   | <i>RAB26</i>      | 5'UTR            | S_Shore | 0.555±0.126 | 0.38±0.10   |       |          |          |        |

|            |    |           |          |                  |         |             |             |       |          |          |        |
|------------|----|-----------|----------|------------------|---------|-------------|-------------|-------|----------|----------|--------|
| cg26271591 | 2  | 178125956 | NFE2L2   | 5'UTR/1st intron | N_Shelf | 0.282±0.1   | 0.106±0.043 | 0.175 | 1.32E-03 | 1.63E-06 | -0.234 |
| cg18485872 | 2  | 242750355 | NEU4     | 5'UTR/1st exon   | N_Shelf | 0.565±0.085 | 0.39±0.08   | 0.175 | 2.87E-04 | 4.08E-18 | -0.410 |
| cg08534147 | 3  | 48471771  | PLXNB1   | TSS1500          | S_Shore | 0.358±0.099 | 0.183±0.053 | 0.175 | 1.21E-03 | 7.82E-07 | -0.241 |
| cg08601673 | 16 | 2083393   | SLC9A3R2 | 1st exon         | N_Shelf | 0.475±0.135 | 0.301±0.147 | 0.175 | 9.88E-03 | 7.01E-26 | -0.487 |
| cg17647273 | 22 | 24891452  | UPB1     | 1st exon         | Island  | 0.52±0.108  | 0.346±0.052 | 0.175 | 2.07E-03 | 5.05E-33 | -0.543 |
| cg22061832 | 2  | 173293627 | ITGA6    | 5'UTR/1st intron | S_Shore | 0.351±0.115 | 0.176±0.085 | 0.175 | 2.82E-03 | 2.52E-08 | -0.270 |
| cg10999598 | 5  | 125936257 | PHAX     | TSS1500          | N_Shore | 0.343±0.057 | 0.169±0.066 | 0.174 | 5.01E-06 | 1.11E-05 | -0.215 |
| cg21402035 | 22 | 38219400  | GALR3    | 5'UTR/1st exon   | N_Shore | 0.52±0.109  | 0.346±0.099 | 0.174 | 2.10E-03 | 1.47E-05 | -0.212 |
| cg11705746 | 11 | 2398061   | CD81     | 5'UTR/1st intron | N_Shore | 0.462±0.104 | 0.288±0.124 | 0.174 | 1.92E-03 | 4.11E-05 | -0.201 |
| cg25117600 | 4  | 10023201  | SLC2A9   | TSS200           | S_Shelf | 0.297±0.078 | 0.123±0.103 | 0.174 | 1.73E-04 | 5.63E-19 | -0.419 |
| cg01883777 | 22 | 38201848  | H1FO     | 1st exon         | S_Shore | 0.265±0.079 | 0.091±0.042 | 0.174 | 2.60E-04 | 7.35E-18 | -0.407 |
| cg24474409 | 7  | 150021518 | LRRG61   | 5'UTR/1st intron | S_Shore | 0.512±0.125 | 0.339±0.073 | 0.174 | 5.05E-03 | 9.12E-12 | -0.328 |
| cg10409299 | 7  | 150498843 | TMEM176B | TSS1500          | S_Shore | 0.491±0.091 | 0.317±0.072 | 0.174 | 5.83E-04 | 1.06E-19 | -0.427 |
| cg08976550 | 21 | 46876385  | COL18A1  | 1st exon         | Island  | 0.598±0.119 | 0.425±0.08  | 0.174 | 3.73E-03 | 1.87E-06 | -0.232 |
| cg23959311 | 1  | 229406360 | RAB4A    | TSS1500          | N_Shore | 0.402±0.105 | 0.228±0.073 | 0.174 | 1.68E-03 | 2.17E-16 | -0.390 |
| cg19576556 | 17 | 80024177  | DUS1L    | TSS1500          | Island  | 0.527±0.118 | 0.354±0.161 | 0.173 | 6.37E-03 | 5.22E-09 | -0.283 |
| cg21577356 | 7  | 150021488 | LRRG61   | 5'UTR/1st intron | S_Shore | 0.434±0.105 | 0.261±0.057 | 0.173 | 1.78E-03 | 2.85E-09 | -0.287 |
| cg02451670 | 1  | 212207806 | DTL      | TSS1500          | N_Shore | 0.358±0.097 | 0.185±0.066 | 0.173 | 9.84E-04 | 3.74E-05 | -0.202 |
| cg23718736 | 18 | 6413908   | L3MBTL4  | 5'UTR/1st intron | N_Shore | 0.371±0.124 | 0.197±0.071 | 0.173 | 4.82E-03 | 1.81E-12 | -0.338 |
| cg15114013 | 1  | 41159283  | NFYC     | 5'UTR/1st intron | S_Shore | 0.495±0.086 | 0.322±0.119 | 0.173 | 5.39E-04 | 3.50E-08 | -0.268 |
| cg23497644 | 2  | 170654835 | SSB      | TSS1500          | N_Shore | 0.347±0.068 | 0.174±0.083 | 0.173 | 3.99E-05 | 3.86E-06 | -0.225 |
| cg07645844 | 8  | 26722635  | ADRA1A   | 1st exon         | Island  | 0.374±0.076 | 0.201±0.07  | 0.173 | 1.12E-04 | 7.09E-14 | -0.358 |
| cg03870862 | 8  | 144624225 | ZC3H3    | TSS1500          | S_Shore | 0.552±0.117 | 0.379±0.153 | 0.173 | 5.62E-03 | 1.90E-05 | -0.209 |
| cg03708161 | 2  | 211090487 | ACADL    | TSS1500          | S_Shore | 0.405±0.134 | 0.232±0.133 | 0.173 | 9.18E-03 | 1.77E-15 | -0.378 |
| cg01116810 | 22 | 24891153  | UPB1     | TSS200           | Island  | 0.51±0.099  | 0.337±0.039 | 0.173 | 1.42E-03 | 5.76E-12 | -0.331 |
| cg05063690 | 21 | 46876305  | COL18A1  | 1st exon         | Island  | 0.632±0.121 | 0.459±0.083 | 0.173 | 4.15E-03 | 1.79E-09 | -0.291 |
| cg14076390 | 17 | 34947837  | DHRS11   | TSS1500          | N_Shore | 0.43±0.116  | 0.257±0.117 | 0.173 | 3.67E-03 | 4.73E-10 | -0.301 |
| cg26385222 | 7  | 150497077 | TMEM176B | 5'UTR/1st intron | Island  | 0.31±0.097  | 0.137±0.062 | 0.173 | 1.03E-03 | 2.65E-10 | -0.305 |
| cg26385222 | 7  | 150497077 | TMEM176A | TSS1500          | Island  | 0.31±0.097  | 0.137±0.062 | 0.173 | 1.03E-03 | 1.17E-09 | -0.294 |
| cg20277356 | 10 | 123353800 | FGFR2    | 5'UTR/1st intron | N_Shelf | 0.744±0.111 | 0.571±0.195 | 0.173 | 9.11E-03 | 4.40E-14 | -0.360 |
| cg26134090 | 4  | 48909057  | OC1AD2   | TSS1500          | S_Shore | 0.478±0.112 | 0.306±0.046 | 0.173 | 3.00E-03 | 7.68E-27 | -0.495 |
| cg09476306 | 22 | 22086335  | YPEL1    | 5'UTR/1st intron | N_Shelf | 0.776±0.043 | 0.603±0.205 | 0.173 | 2.78E-03 | 2.55E-29 | -0.515 |
| cg18642234 | 3  | 49394622  | GPX1     | 1st exon/3'UTR   | N_Shore | 0.361±0.138 | 0.189±0.128 | 0.173 | 1.02E-02 | 1.44E-18 | -0.415 |
| cg25683744 | 12 | 681324    | NINJ2    | 5'UTR/1st intron | S_Shelf | 0.638±0.121 | 0.466±0.187 | 0.172 | 1.07E-02 | 1.13E-11 | -0.326 |
| cg20995835 | 17 | 18528589  | CCDC144B | 1st exon         | Island  | 0.725±0.08  | 0.552±0.129 | 0.172 | 4.43E-04 | 2.13E-14 | -0.365 |
| cg00003014 | 3  | 197279819 | BDH1     | 5'UTR            | N_Shore | 0.759±0.086 | 0.587±0.15  | 0.172 | 1.24E-03 | 2.29E-09 | -0.289 |
| cg08820801 | 19 | 39465821  | FBXO17   | 5'UTR/1st intron | N_Shore | 0.384±0.086 | 0.212±0.067 | 0.172 | 3.74E-04 | 3.11E-06 | -0.227 |
| cg13504907 | 9  | 5185586   | INSL6    | 1st exon         | Island  | 0.739±0.07  | 0.567±0.192 | 0.172 | 2.83E-03 | 4.43E-14 | -0.360 |
| cg13348905 | 19 | 10735578  | SLC44A2  | TSS1500          | N_Shore | 0.665±0.095 | 0.493±0.264 | 0.172 | 2.29E-02 | 2.21E-07 | -0.252 |
| cg14078053 | 2  | 227661656 | IRS1     | 1st exon         | N_Shore | 0.556±0.077 | 0.384±0.077 | 0.172 | 1.30E-04 | 5.46E-12 | -0.331 |
| cg02641676 | 8  | 42397764  | SLC20A2  | TSS1500          | S_Shore | 0.363±0.129 | 0.191±0.083 | 0.172 | 6.45E-03 | 9.86E-13 | -0.342 |
| cg23684449 | 16 | 46919194  | GPT2     | 5'UTR/1st exon   | S_Shore | 0.438±0.12  | 0.266±0.066 | 0.172 | 4.20E-03 | 9.45E-25 | -0.477 |
| cg17719951 | 2  | 69970639  | ANXA4    | 5'UTR            | S_Shore | 0.549±0.171 | 0.377±0.118 | 0.171 | 2.77E-02 | 1.51E-06 | -0.234 |
| cg12432038 | 1  | 247275735 | C1orf229 | TSS200           | N_Shelf | 0.635±0.146 | 0.464±0.231 | 0.171 | 3.33E-02 | 2.88E-15 | -0.376 |
| cg04604142 | 17 | 48796515  | LUC7L3   | TSS1500          | N_Shore | 0.355±0.095 | 0.184±0.076 | 0.171 | 8.90E-04 | 5.03E-07 | -0.245 |
| cg09355820 | 1  | 10092237  | UBE4B    | TSS1500          | N_Shore | 0.6±0.154   | 0.428±0.138 | 0.171 | 1.92E-02 | 4.53E-06 | -0.224 |
| cg00714531 | 21 | 46955647  | SLC19A1  | 5'UTR            | N_Shore | 0.879±0.015 | 0.708±0.221 | 0.171 | 4.37E-03 | 4.46E-10 | -0.301 |
| cg16385330 | 4  | 151503878 | MAB21L2  | 5'UTR/1st exon   | S_Shelf | 0.658±0.122 | 0.486±0.248 | 0.171 | 2.71E-02 | 3.44E-06 | -0.226 |
| cg06599920 | 14 | 47121117  | RPL10L   | TSS200           | Island  | 0.642±0.152 | 0.471±0.197 | 0.171 | 2.76E-02 | 1.10E-06 | -0.237 |
| cg21330960 | 22 | 23415915  | GNAZ     | 5'UTR/1st intron | S_Shelf | 0.582±0.078 | 0.411±0.11  | 0.171 | 2.40E-04 | 1.35E-06 | -0.235 |
| cg14324805 | 22 | 30902615  | SEC14L4  | TSS1500          | S_Shore | 0.543±0.141 | 0.372±0.137 | 0.171 | 1.29E-02 | 2.70E-05 | -0.205 |
| cg11961138 | 17 | 38599366  | IGFBP4   | TSS1500          | N_Shore | 0.287±0.1   | 0.116±0.085 | 0.171 | 1.30E-03 | 3.88E-05 | -0.201 |
| cg02976109 | 12 | 124119053 | EIF2B1   | TSS1500          | S_Shore | 0.409±0.105 | 0.238±0.059 | 0.171 | 2.00E-03 | 7.24E-13 | -0.344 |
| cg04406254 | 19 | 45407945  | APOE     | TSS1500          | N_Shelf | 0.429±0.08  | 0.258±0.058 | 0.171 | 2.53E-04 | 1.33E-07 | -0.256 |
| cg13883232 | 9  | 139746122 | MAMDC4   | TSS1500          | S_Shore | 0.721±0.059 | 0.55±0.195  | 0.171 | 2.62E-03 | 6.60E-31 | -0.528 |
| cg13987606 | 1  | 160002698 | PIGM     | TSS1500          | S_Shore | 0.365±0.108 | 0.194±0.103 | 0.171 | 2.27E-03 | 1.76E-15 | -0.378 |
| cg17329648 | 2  | 73297389  | SFXN5    | 5'UTR/1st intron | N_Shore | 0.268±0.125 | 0.097±0.052 | 0.171 | 5.78E-03 | 2.59E-14 | -0.363 |
| cg24607398 | 3  | 37033625  | EPM2AIP1 | 1st exon         | N_Shore | 0.411±0.173 | 0.241±0.118 | 0.171 | 2.95E-02 | 2.60E-08 | -0.270 |
| cg17639959 | 2  | 73297338  | SFXN5    | 5'UTR/1st intron | N_Shore | 0.339±0.116 | 0.168±0.054 | 0.171 | 3.73E-03 | 2.69E-10 | -0.305 |
| cg26385085 | 4  | 53109     | ZNF595   | TSS200           | N_Shore | 0.429±0.041 | 0.259±0.073 | 0.171 | 1.26E-07 | 1.45E-16 | -0.392 |
| cg18919106 | 8  | 132918665 | EFR3A    | 5'UTR/1st intron | S_Shore | 0.289±0.129 | 0.119±0.097 | 0.170 | 7.03E-03 | 9.51E-12 | -0.327 |
| cg26301689 | 3  | 142681704 | PAQR9    | 1st exon         | Island  | 0.57±0.095  | 0.4±0.065   | 0.170 | 9.84E-04 | 1.35E-15 | -0.380 |
| cg05800289 | 11 | 77301496  | AQP11    | 1st exon         | S_Shore | 0.279±0.085 | 0.109±0.052 | 0.170 | 4.84E-04 | 1.69E-07 | -0.254 |
| cg22778981 | 17 | 37856133  | ERBB2    | 5'UTR            | N_Shore | 0.237±0.106 | 0.067±0.039 | 0.170 | 2.44E-03 | 1.36E-07 | -0.256 |
| cg01116188 | 13 | 36788859  | SOHLH2   | TSS200           | Island  | 0.738±0.129 | 0.569±0.169 | 0.169 | 1.22E-02 | 1.26E-05 | -0.213 |
| cg13723011 | 3  | 52737693  | GLT8D1   | 5'UTR            | N_Shore | 0.801±0.176 | 0.632±0.199 | 0.169 | 4.61E-02 | 1.19E-28 | -0.510 |
| cg03963919 | 6  | 33167187  | SLC39A7  | TSS1500          | N_Shore | 0.431±0.061 | 0.263±0.113 | 0.169 | 5.67E-05 | 6.56E-07 | -0.242 |
| cg01313363 | 3  | 48471695  | PLXNB1   | TSS1500          | S_Shore | 0.362±0.087 | 0.194±0.046 | 0.169 | 6.18E-04 | 6.30E-09 | -0.281 |
| cg06624368 | 16 | 30797627  | ZNF629   | 5'UTR/1st intron | N_Shore | 0.374±0.101 | 0.205±0.08  | 0.169 | 1.57E-03 | 2.08E-06 | -0.231 |
| cg00468320 | 8  | 109800379 | TMEM74   | TSS1500          | S_Shore | 0.588±0.101 | 0.419±0.2   | 0.168 | 8.96E-03 | 5.64E-14 | -0.359 |
| cg23112188 | 14 | 24563095  | PCK2     | TSS1500          | N_Shore | 0.279±0.086 | 0.111±0.047 | 0.168 | 5.65E-04 | 4.60E-11 | -0.317 |
| cg27210390 | 17 | 52978583  | TOM1L1   | 5'UTR/1st intron | S_Shore | 0.313±0.102 | 0.145±0.048 | 0.168 | 1.94E-03 | 2.16E-11 | -0.322 |
| cg04240583 | 1  | 151485306 | CGN      | 5'UTR/1st intron | S_Shore | 0.433±0.149 | 0.265±0.116 | 0.168 | 1.65E-02 | 3.61E-33 | -0.544 |
| cg03989567 | 1  | 236686012 | LGALS8   | 5'UTR            | N_Shore | 0.484±0.087 | 0.316±0.136 | 0.168 | 1.10E-03 | 2.09E-05 | -0.208 |
| cg00715323 | 2  | 11479980  | ROCK2    | 5'UTR/1st intron | N_Shelf | 0.795±0.067 | 0.627±0.242 | 0.168 | 1.26E-02 | 6.01E-10 | -0.299 |
| cg20939084 | 3  | 147109784 | ZIC4     | 1st exon         | Island  | 0.418±0.091 | 0.25±0.134  | 0.168 | 1.42E-03 | 8.70E-07 | -0.240 |
| cg24022152 | 11 | 12133196  | MICAL2   | 5'UTR/1st intron | S_Shore | 0.628±0.16  | 0.46±0.18   | 0.168 | 3.11E-02 | 1.43E-16 | -0.392 |
| cg24184792 | 8  | 132919238 | EFR3A    | 5'UTR/1st intron | S_Shelf | 0.795±0.042 | 0.627±0.203 | 0.168 | 3.17E-03 | 1.00E-18 | -0.417 |
| cg14688272 | 17 | 80673958  | FN3KRP   | TSS1500          | N_Shore | 0.416±0.116 | 0.248±0.113 | 0.168 | 4.47E-03 | 1.63E-05 | -0.211 |
| cg15466702 | 20 | 62688050  | TCEA2    | TSS1500          | N_Shore | 0.6±0.13    | 0.432±0.186 | 0.168 | 1.61E-02 | 3.15E-07 | -0.249 |
| cg02216394 | 6  | 30178715  | TRIM26   | 5'UTR/1st intron | N_Shelf | 0.693±0.062 | 0.525±0.129 | 0.168 | 1.61E-04 | 5.89E-14 | -0.359 |
| cg05546038 | 16 | 67207033  | NOL3     | 5'UTR            | S_Shelf | 0.698±0.054 | 0.531±0.205 | 0.168 | 3.91E-03 | 3.24E-06 | -0.227 |
| cg16785938 | 4  | 10022984  | SLC2A9   | 1st exon         | S_Shore | 0.502±0.066 | 0.334±0.179 | 0.168 | 2.00E-03 | 3.22E-46 | -0.626 |
| cg12575928 | 11 | 22687660  | GAS2     | TSS1500          | N_Shore | 0.327±0.106 | 0.159±0.058 | 0.168 | 2.34E-03 | 6.90E-11 | -0.314 |
| cg06452665 | 13 | 43148436  | TNFSF11  | 5'UTR            | Island  | 0.256±0.168 | 0.088±0.122 | 0.168 | 2.83E-02 | 2.93E-06 | -0.228 |
| cg03534662 | 3  | 45636225  | LIMD1    | TSS200           | S_Shore | 0.279±0.081 | 0.111±0.042 | 0.168 | 3.88E-04 | 7.31E-09 | -0.280 |
| cg01330312 | 10 | 51567670  | NCOA4    | 5'UTR/1st intron | S_Shelf | 0.542±0.066 | 0.374       |       |          |          |        |

|            |    |           |             |                  |         |             |             |       |          |          |        |
|------------|----|-----------|-------------|------------------|---------|-------------|-------------|-------|----------|----------|--------|
| cg14037218 | 1  | 150522367 | ADAMTSL4    | 5'UTR            | Island  | 0.413±0.1   | 0.246±0.073 | 0.167 | 1.49E-03 | 3.77E-10 | -0.302 |
| cg25274157 | 19 | 19626576  | TSSK6       | TSS200           | Island  | 0.448±0.119 | 0.281±0.105 | 0.167 | 4.89E-03 | 1.19E-06 | -0.237 |
| cg20366479 | 2  | 217501125 | IGFBP2      | 5'UTR/1st intron | S_Shelf | 0.478±0.125 | 0.311±0.178 | 0.167 | 1.30E-02 | 4.87E-26 | -0.488 |
| cg10451262 | 8  | 124284176 | ZHX1        | 5'UTR/1st intron | N_Shelf | 0.364±0.131 | 0.197±0.072 | 0.167 | 8.20E-03 | 2.13E-13 | -0.351 |
| cg18354594 | 1  | 247276647 | C1orf229    | TSS1500          | N_Shelf | 0.506±0.155 | 0.339±0.193 | 0.167 | 3.18E-02 | 8.05E-10 | -0.297 |
| cg20664247 | 1  | 2345475   | PEX10       | TSS1500          | S_Shore | 0.408±0.087 | 0.242±0.061 | 0.166 | 5.87E-04 | 2.02E-06 | -0.232 |
| cg06738887 | 15 | 60688010  | ANXA2       | 5'UTR            | N_Shelf | 0.324±0.153 | 0.158±0.086 | 0.166 | 1.80E-02 | 1.34E-09 | -0.293 |
| cg11242907 | 17 | 45919419  | SCRN2       | TSS1500          | S_Shore | 0.362±0.121 | 0.196±0.074 | 0.166 | 5.44E-03 | 6.33E-10 | -0.298 |
| cg09322432 | 22 | 42527611  | CYP2D6      | TSS1500          | S_Shore | 0.718±0.069 | 0.552±0.163 | 0.166 | 1.27E-03 | 2.67E-13 | -0.350 |
| cg06444781 | 12 | 121416510 | HNF1A       | 5'UTR/1st exon   | Island  | 0.538±0.108 | 0.372±0.064 | 0.166 | 2.69E-03 | 1.94E-21 | -0.445 |
| cg08172037 | 1  | 92414985  | BRDT        | 5'UTR/1st exon   | Island  | 0.861±0.06  | 0.695±0.199 | 0.166 | 3.85E-03 | 3.10E-12 | -0.335 |
| cg06477464 | 5  | 68790044  | OCLN        | 5'UTR/1st intron | S_Shore | 0.525±0.092 | 0.359±0.074 | 0.166 | 8.49E-04 | 6.00E-08 | -0.263 |
| cg11123545 | 5  | 139939040 | SRA1        | TSS1500          | S_Shore | 0.739±0.048 | 0.574±0.144 | 0.166 | 2.28E-04 | 1.40E-07 | -0.256 |
| cg06041363 | 22 | 46663418  | TTC38       | TSS1500          | N_Shore | 0.259±0.094 | 0.093±0.04  | 0.166 | 1.32E-03 | 2.26E-10 | -0.306 |
| cg07452306 | 2  | 73299297  | SFXN5       | TSS1500          | S_Shore | 0.342±0.097 | 0.177±0.048 | 0.165 | 1.49E-03 | 1.73E-14 | -0.366 |
| cg03065614 | 6  | 44096542  | TMEM63B     | 5'UTR/1st intron | S_Shore | 0.581±0.128 | 0.416±0.104 | 0.165 | 8.14E-03 | 1.29E-07 | -0.257 |
| cg03065614 | 6  | 44096542  | MRPL14      | TSS1500          | S_Shore | 0.581±0.128 | 0.416±0.104 | 0.165 | 8.14E-03 | 4.32E-06 | -0.224 |
| cg09063149 | 1  | 151882779 | THEM4       | TSS1500          | S_Shore | 0.385±0.119 | 0.22±0.117  | 0.165 | 5.95E-03 | 1.83E-09 | -0.291 |
| cg04617640 | 21 | 46874243  | COL18A1     | TSS1500          | N_Shore | 0.369±0.103 | 0.205±0.057 | 0.165 | 2.12E-03 | 1.69E-07 | -0.254 |
| cg14396214 | 20 | 62367998  | LIME1       | 5'UTR/1st exon   | N_Shore | 0.429±0.08  | 0.265±0.153 | 0.165 | 1.52E-03 | 3.65E-21 | -0.442 |
| cg20772512 | 1  | 38022359  | DNAL1       | TSS200           | N_Shore | 0.281±0.107 | 0.117±0.076 | 0.165 | 2.68E-03 | 4.49E-10 | -0.301 |
| cg19898448 | 4  | 125631415 | ANKRD50     | 5'UTR/1st intron | N_Shore | 0.681±0.092 | 0.516±0.181 | 0.164 | 5.52E-03 | 7.32E-13 | -0.344 |
| cg03123541 | 1  | 95699097  | RWDD3       | TSS1500          | N_Shore | 0.295±0.092 | 0.131±0.053 | 0.164 | 1.05E-03 | 2.24E-05 | -0.207 |
| cg10990993 | 3  | 37033632  | EPH2AIP1    | 1st exon         | N_Shore | 0.394±0.152 | 0.23±0.1    | 0.164 | 1.90E-02 | 4.73E-08 | -0.265 |
| cg16121744 | 21 | 46875149  | COL18A1     | TSS1500          | N_Shore | 0.456±0.1   | 0.291±0.064 | 0.164 | 1.79E-03 | 1.78E-05 | -0.210 |
| cg24731625 | 1  | 247276552 | C1orf229    | TSS1500          | N_Shelf | 0.355±0.105 | 0.191±0.082 | 0.164 | 2.45E-03 | 4.11E-08 | -0.266 |
| cg24855045 | 10 | 18938449  | NSUN6       | 5'UTR/1st intron | N_Shelf | 0.415±0.085 | 0.251±0.054 | 0.164 | 6.07E-04 | 9.96E-11 | -0.312 |
| cg17950169 | 1  | 226067900 | TMEM63A     | 5'UTR/1st intron | N_Shore | 0.48±0.123  | 0.316±0.162 | 0.164 | 1.13E-02 | 1.54E-08 | -0.274 |
| cg12633680 | 7  | 150779047 | FASTK       | TSS1500          | Island  | 0.387±0.095 | 0.223±0.056 | 0.164 | 1.28E-03 | 3.95E-05 | -0.201 |
| cg01960280 | 6  | 100015610 | CCNC        | 5'UTR/1st intron | N_Shore | 0.304±0.099 | 0.14±0.052  | 0.164 | 1.82E-03 | 4.84E-09 | -0.283 |
| cg22379576 | 1  | 173790504 | CENPL       | 5'UTR            | N_Shelf | 0.476±0.085 | 0.312±0.117 | 0.164 | 7.72E-04 | 1.75E-08 | -0.273 |
| cg12089204 | 11 | 1318605   | TOLLIP      | 5'UTR/1st intron | S_Shore | 0.845±0.068 | 0.681±0.206 | 0.164 | 6.08E-03 | 4.30E-10 | -0.301 |
| cg06520846 | 1  | 42921582  | ZMYND12     | 1st exon         | N_Shore | 0.352±0.156 | 0.188±0.137 | 0.164 | 2.47E-02 | 4.47E-28 | -0.505 |
| cg25587233 | 9  | 131872005 | CRAT        | 5'UTR/1st intron | N_Shore | 0.42±0.1    | 0.256±0.057 | 0.164 | 1.87E-03 | 4.83E-10 | -0.300 |
| cg02968557 | 17 | 40275126  | HSPB9       | 1st exon         | Island  | 0.455±0.12  | 0.292±0.079 | 0.164 | 5.66E-03 | 1.55E-14 | -0.366 |
| cg09886641 | 15 | 69223018  | SPESP1      | 1st exon         | Island  | 0.623±0.124 | 0.459±0.124 | 0.164 | 8.02E-03 | 1.18E-08 | -0.276 |
| cg21157873 | 1  | 151486487 | CGN         | 5'UTR/1st intron | S_Shelf | 0.392±0.124 | 0.229±0.073 | 0.163 | 6.72E-03 | 2.14E-09 | -0.289 |
| cg06850526 | 17 | 79269886  | SLC38A10    | TSS1500          | S_Shore | 0.41±0.107  | 0.246±0.072 | 0.163 | 2.87E-03 | 4.40E-08 | -0.266 |
| cg21993406 | 5  | 68484783  | CENPH       | TSS1500          | N_Shore | 0.406±0.11  | 0.242±0.122 | 0.163 | 4.21E-03 | 2.78E-05 | -0.205 |
| cg23016776 | 10 | 99081496  | FRAT1       | 1st exon/3'UTR   | S_Shore | 0.561±0.172 | 0.397±0.172 | 0.163 | 4.29E-02 | 6.78E-08 | -0.262 |
| cg25318278 | 11 | 50257830  | LOC441601   | TSS200           | S_Shore | 0.444±0.052 | 0.281±0.095 | 0.163 | 1.10E-05 | 6.51E-10 | -0.298 |
| cg08833432 | 20 | 60719824  | SS18L1      | 5'UTR/1st intron | S_Shore | 0.314±0.076 | 0.151±0.093 | 0.163 | 2.18E-04 | 3.64E-24 | -0.471 |
| cg11520395 | 1  | 227924115 | SNAP47      | 5'UTR            | S_Shore | 0.443±0.123 | 0.28±0.098  | 0.163 | 6.76E-03 | 5.14E-07 | -0.244 |
| cg11520395 | 1  | 227924115 | JMJD4       | TSS1500          | S_Shore | 0.443±0.123 | 0.28±0.098  | 0.163 | 6.76E-03 | 9.28E-07 | -0.239 |
| cg00007221 | 1  | 43999020  | PTPRF       | 5'UTR            | S_Shore | 0.568±0.071 | 0.405±0.127 | 0.163 | 3.89E-04 | 3.14E-08 | -0.268 |
| cg02249841 | 11 | 2397784   | CD81        | 5'UTR/1st intron | N_Shore | 0.474±0.143 | 0.312±0.128 | 0.163 | 1.71E-02 | 8.55E-07 | -0.240 |
| cg24631526 | 20 | 62367961  | LIME1       | 5'UTR/1st exon   | N_Shore | 0.393±0.126 | 0.23±0.198  | 0.163 | 2.02E-02 | 1.26E-16 | -0.392 |
| cg14276120 | 9  | 71792936  | TJP2        | 5'UTR            | S_Shelf | 0.718±0.062 | 0.555±0.168 | 0.163 | 1.50E-03 | 6.11E-18 | -0.408 |
| cg02365780 | 2  | 101437872 | NPAS2       | 5'UTR/1st intron | S_Shore | 0.429±0.117 | 0.267±0.121 | 0.163 | 5.97E-03 | 5.53E-18 | -0.408 |
| cg18998365 | 5  | 142781532 | NR3C1       | 5'UTR/1st intron | N_Shore | 0.29±0.077  | 0.127±0.053 | 0.163 | 2.74E-04 | 1.13E-06 | -0.237 |
| cg01492909 | 11 | 2397811   | CD81        | 5'UTR/1st intron | N_Shore | 0.536±0.131 | 0.374±0.164 | 0.163 | 1.56E-02 | 1.06E-09 | -0.295 |
| cg00270789 | 16 | 46919075  | GPT2        | 5'UTR/1st exon   | S_Shore | 0.258±0.094 | 0.096±0.041 | 0.162 | 1.45E-03 | 1.27E-09 | -0.293 |
| cg06468619 | 19 | 50084552  | PRRG2       | TSS200           | S_Shore | 0.478±0.111 | 0.315±0.122 | 0.162 | 4.68E-03 | 2.38E-27 | -0.499 |
| cg16806077 | 6  | 31513198  | NFKB1L      | TSS1500          | S_Shelf | 0.673±0.118 | 0.511±0.157 | 0.162 | 9.63E-03 | 3.96E-05 | -0.201 |
| cg19421368 | 20 | 45280288  | SLC13A3     | 5'UTR            | S_Shore | 0.376±0.137 | 0.214±0.135 | 0.162 | 1.48E-02 | 7.54E-11 | -0.314 |
| cg24332710 | 1  | 46016173  | AKR1A1      | TSS1500          | N_Shore | 0.303±0.12  | 0.141±0.071 | 0.162 | 5.89E-03 | 8.77E-14 | -0.356 |
| cg10162914 | 4  | 170943016 | MFAP3L      | 5'UTR/1st intron | N_Shelf | 0.778±0.053 | 0.616±0.149 | 0.162 | 4.66E-04 | 2.54E-07 | -0.251 |
| cg25399743 | 8  | 27348177  | EPHX2       | TSS1500          | N_Shore | 0.258±0.1   | 0.096±0.039 | 0.162 | 2.23E-03 | 2.83E-08 | -0.269 |
| cg14234104 | 11 | 69931467  | ANO1        | TSS200           | N_Shelf | 0.709±0.082 | 0.547±0.199 | 0.162 | 7.42E-03 | 6.74E-14 | -0.358 |
| cg00410034 | 22 | 32869991  | FBXO7       | TSS1500          | N_Shore | 0.433±0.094 | 0.271±0.056 | 0.162 | 1.29E-03 | 5.82E-10 | -0.299 |
| cg05812089 | 11 | 19736648  | OC100126784 | TSS1500          | S_Shore | 0.329±0.088 | 0.168±0.117 | 0.162 | 1.14E-03 | 4.18E-07 | -0.246 |
| cg18529243 | 11 | 58911115  | FAM111A     | 5'UTR            | S_Shore | 0.42±0.116  | 0.258±0.133 | 0.162 | 6.55E-03 | 2.71E-13 | -0.350 |
| cg01759155 | 14 | 103388797 | AMN         | TSS200           | N_Shore | 0.671±0.14  | 0.509±0.132 | 0.161 | 1.64E-02 | 4.97E-08 | -0.265 |
| cg01496970 | 7  | 102388500 | FAM185A     | TSS1500          | N_Shore | 0.395±0.075 | 0.234±0.067 | 0.161 | 2.01E-04 | 6.42E-07 | -0.242 |
| cg04700814 | 17 | 43224180  | HEXIM1      | TSS1500          | N_Shore | 0.752±0.092 | 0.591±0.233 | 0.161 | 1.86E-02 | 2.60E-05 | -0.206 |
| cg23940614 | 15 | 84115479  | SH3GL3      | TSS1500          | N_Shore | 0.479±0.089 | 0.318±0.195 | 0.161 | 7.98E-03 | 4.65E-06 | -0.223 |
| cg04966195 | 7  | 87105398  | ABC84       | TSS1500          | S_Shore | 0.338±0.159 | 0.177±0.182 | 0.161 | 3.74E-02 | 9.12E-27 | -0.494 |
| cg07418892 | 6  | 52150456  | MCM3        | TSS1500          | S_Shore | 0.421±0.164 | 0.26±0.078  | 0.161 | 2.80E-02 | 9.98E-07 | -0.238 |
| cg12258811 | 1  | 7844735   | PER3        | 5'UTR            | Island  | 0.35±0.086  | 0.189±0.064 | 0.161 | 6.81E-04 | 1.48E-11 | -0.324 |
| cg02549492 | 5  | 95066568  | RHOBTB3     | TSS1500          | N_Shore | 0.277±0.098 | 0.116±0.061 | 0.161 | 1.80E-03 | 1.57E-13 | -0.353 |
| cg15662251 | 1  | 26197855  | PAQR7       | TSS200           | N_Shelf | 0.499±0.047 | 0.338±0.145 | 0.160 | 3.33E-04 | 3.62E-05 | -0.202 |
| cg13459303 | 7  | 150499276 | TMEM176B    | TSS1500          | S_Shore | 0.555±0.112 | 0.395±0.155 | 0.160 | 7.98E-03 | 3.58E-19 | -0.421 |
| cg22790931 | 7  | 39017455  | POU6F2      | TSS200           | S_Shore | 0.79±0.091  | 0.63±0.241  | 0.160 | 2.17E-02 | 1.91E-05 | -0.209 |
| cg06070002 | 1  | 45986120  | PRDX1       | 5'UTR/1st intron | N_Shore | 0.478±0.129 | 0.318±0.138 | 0.160 | 1.24E-02 | 3.84E-17 | -0.399 |
| cg13811417 | 9  | 25677628  | TUSC1       | 1st exon/3'UTR   | Island  | 0.244±0.128 | 0.084±0.082 | 0.160 | 9.33E-03 | 1.57E-15 | -0.379 |
| cg10110998 | 6  | 30639987  | DHX16       | 5'UTR/1st intron | N_Shore | 0.409±0.091 | 0.25±0.053  | 0.159 | 1.19E-03 | 5.97E-08 | -0.263 |
| cg06913600 | 2  | 43020682  | HAAO        | TSS1500          | S_Shore | 0.383±0.074 | 0.223±0.062 | 0.159 | 2.04E-04 | 1.88E-05 | -0.209 |
| cg22833478 | 11 | 2925623   | SLC22A18A5  | TSS1500          | S_Shore | 0.513±0.109 | 0.353±0.109 | 0.159 | 4.26E-03 | 1.64E-11 | -0.324 |
| cg15978899 | 6  | 30882994  | VARS2       | 5'UTR            | S_Shore | 0.565±0.088 | 0.406±0.131 | 0.159 | 1.63E-03 | 3.93E-06 | -0.225 |
| cg21107581 | 19 | 49258805  | FGF21       | TSS200           | S_Shelf | 0.365±0.081 | 0.206±0.058 | 0.159 | 4.98E-04 | 1.08E-06 | -0.238 |
| cg08702413 | 5  | 125931275 | ALDH7A1     | TSS200           | S_Shore | 0.22±0.121  | 0.061±0.042 | 0.159 | 7.06E-03 | 6.02E-07 | -0.243 |
| cg05542967 | 2  | 234667988 | UGT1A1      | TSS1500          | S_Shelf | 0.868±0.076 | 0.709±0.185 | 0.159 | 4.76E-03 | 1.41E-10 | -0.309 |
| cg24110063 | 16 | 31439752  | COX6A2      | TSS200           | S_Shore | 0.566±0.1   | 0.407±0.211 | 0.159 | 1.56E-02 | 1.03E-19 | -0.427 |
| cg08886823 | 16 | 68270882  | ESRP2       | TSS1500          | Island  | 0.278±0.102 | 0.12±0.038  | 0.159 | 2.86E-03 | 1.26E-05 | -0.213 |
| cg02578321 | 1  | 247275872 | C1orf229    | TSS200           | N_Shelf | 0.632±0.113 | 0.473±0.168 | 0.159 | 1.08E-02 | 1.39E-14 | -0.367 |
| cg22425466 | 9  | 140115987 | RNF208      | TSS1500          | S_Shore | 0.593±0.117 | 0.434±0.127 | 0.159 | 7.59E-03 | 4.84E-09 | -0.283 |
| cg22250546 | 19 | 33791370  | CEBPA       | 1st exon/3'UTR   | N_Shore | 0.335±0.095 | 0.177±      |       |          |          |        |

|            |    |           |            |                  |         |             |             |       |          |          |        |
|------------|----|-----------|------------|------------------|---------|-------------|-------------|-------|----------|----------|--------|
| cg17342132 | 5  | 142780254 | NR3C1      | 5'UTR            | N_Shore | 0.526±0.09  | 0.368±0.163 | 0.158 | 4.30E-03 | 4.57E-10 | -0.301 |
| cg13886554 | 2  | 112895695 | FBLN7      | TSS1500          | N_Shore | 0.334±0.169 | 0.176±0.164 | 0.158 | 4.41E-02 | 5.40E-09 | -0.282 |
| cg25393494 | 17 | 17109936  | PLD6       | TSS1500          | S_Shore | 0.314±0.102 | 0.155±0.045 | 0.158 | 2.77E-03 | 1.93E-05 | -0.209 |
| cg26071135 | 11 | 843943    | TSPAN4     | 5'UTR/1st intron | S_Shore | 0.299±0.114 | 0.141±0.125 | 0.158 | 6.52E-03 | 4.88E-11 | -0.317 |
| cg19583655 | 17 | 79869752  | PCYT2      | TSS1500          | Island  | 0.548±0.108 | 0.39±0.198  | 0.158 | 1.52E-02 | 2.89E-07 | -0.249 |
| cg13814664 | 13 | 36788926  | SOHLH2     | TSS200           | Island  | 0.693±0.126 | 0.535±0.18  | 0.158 | 1.91E-02 | 2.58E-07 | -0.251 |
| cg16432009 | 22 | 37955936  | CDC42EP1   | TSS1500          | N_Shore | 0.64±0.112  | 0.482±0.123 | 0.158 | 5.73E-03 | 6.04E-13 | -0.345 |
| cg27639142 | 3  | 126072941 | KLF15      | 5'UTR/1st intron | N_Shore | 0.416±0.08  | 0.259±0.056 | 0.158 | 4.96E-04 | 1.20E-22 | -0.457 |
| cg07507951 | 1  | 247096025 | AHCTF1     | TSS1500          | S_Shore | 0.469±0.099 | 0.311±0.17  | 0.158 | 7.13E-03 | 1.15E-06 | -0.237 |
| cg03137177 | 21 | 44488499  | GBF5       | 5'UTR/1st exon   | S_Shelf | 0.343±0.113 | 0.186±0.069 | 0.157 | 4.89E-03 | 5.69E-10 | -0.299 |
| cg00414835 | 10 | 48439452  | CDB1       | TSS1500          | S_Shore | 0.577±0.128 | 0.42±0.213  | 0.157 | 2.99E-02 | 1.46E-07 | -0.255 |
| cg10516359 | 11 | 45827763  | SLC35C1    | 1st exon         | S_Shore | 0.502±0.077 | 0.346±0.056 | 0.157 | 3.76E-04 | 5.08E-07 | -0.244 |
| cg24068468 | 10 | 5488535   | NET1       | 1st exon         | Island  | 0.322±0.111 | 0.165±0.06  | 0.157 | 4.51E-03 | 8.94E-07 | -0.239 |
| cg26163463 | 5  | 139926773 | EIF4EBP3   | TSS1500          | N_Shore | 0.437±0.091 | 0.28±0.048  | 0.157 | 1.39E-03 | 9.94E-06 | -0.216 |
| cg01483656 | 19 | 21264896  | ZNF714     | TSS200           | N_Shore | 0.383±0.133 | 0.226±0.134 | 0.156 | 1.55E-02 | 2.50E-05 | -0.206 |
| cg13488078 | 8  | 27469338  | CLU        | 5'UTR/1st intron | N_Shelf | 0.42±0.096  | 0.263±0.06  | 0.156 | 1.90E-03 | 6.24E-06 | -0.221 |
| cg20229931 | 21 | 47647656  | LSS        | 5'UTR/1st intron | N_Shore | 0.468±0.105 | 0.312±0.101 | 0.156 | 3.61E-03 | 1.81E-20 | -0.435 |
| cg07549924 | 4  | 54036     | ZNF595     | 5'UTR/1st intron | S_Shore | 0.438±0.076 | 0.281±0.098 | 0.156 | 3.64E-04 | 7.95E-18 | -0.407 |
| cg08950537 | 10 | 95361933  | RBP4       | TSS1500          | S_Shore | 0.277±0.081 | 0.121±0.042 | 0.156 | 6.80E-04 | 8.52E-07 | -0.240 |
| cg24326021 | 19 | 56188459  | EPN1       | 5'UTR/1st exon   | S_Shore | 0.735±0.028 | 0.579±0.212 | 0.156 | 6.56E-03 | 2.29E-05 | -0.207 |
| cg12055459 | 2  | 97652489  | FAM178B    | TSS200           | S_Shore | 0.796±0.112 | 0.64±0.209  | 0.156 | 2.18E-02 | 1.04E-22 | -0.458 |
| cg07907506 | 3  | 100210582 | TMEM45A    | TSS1500          | N_Shore | 0.491±0.147 | 0.335±0.178 | 0.156 | 3.29E-02 | 4.60E-09 | -0.284 |
| cg24904992 | 17 | 77994779  | TBC1D16    | 5'UTR/1st intron | N_Shelf | 0.576±0.033 | 0.421±0.118 | 0.156 | 3.50E-05 | 3.21E-11 | -0.319 |
| cg05235151 | 6  | 35108114  | TCP11      | 5'UTR            | N_Shore | 0.622±0.164 | 0.467±0.144 | 0.156 | 3.92E-02 | 5.58E-08 | -0.264 |
| cg03114748 | 20 | 35973098  | SRC        | 5'UTR/1st exon   | N_Shore | 0.501±0.119 | 0.345±0.09  | 0.156 | 7.40E-03 | 1.84E-05 | -0.210 |
| cg01768131 | 17 | 79869861  | PCYT2      | TSS1500          | S_Shore | 0.441±0.114 | 0.286±0.144 | 0.156 | 8.93E-03 | 1.64E-09 | -0.291 |
| cg03849279 | 16 | 67751821  | GFOD2      | 5'UTR/1st intron | N_Shore | 0.713±0.127 | 0.558±0.205 | 0.156 | 2.78E-02 | 3.14E-18 | -0.411 |
| cg01378222 | 16 | 28622494  | SULT1A1    | TSS1500          | N_Shelf | 0.673±0.142 | 0.518±0.151 | 0.156 | 2.42E-02 | 2.51E-15 | -0.377 |
| cg12712768 | 12 | 121416315 | HNF1A      | TSS200           | N_Shore | 0.412±0.092 | 0.256±0.057 | 0.156 | 1.48E-03 | 3.43E-25 | -0.481 |
| cg17469265 | 4  | 39183353  | WDR19      | TSS1500          | N_Shore | 0.366±0.12  | 0.211±0.063 | 0.155 | 7.34E-03 | 8.58E-08 | -0.260 |
| cg11770325 | 17 | 42081179  | NAG5       | TSS1500          | N_Shore | 0.74±0.045  | 0.585±0.136 | 0.155 | 2.40E-04 | 1.01E-31 | -0.534 |
| cg07620544 | 16 | 31225357  | TRIM72     | 5'UTR/1st exon   | N_Shore | 0.685±0.068 | 0.53±0.213  | 0.155 | 1.07E-02 | 4.15E-06 | -0.225 |
| cg15062470 | 2  | 27718710  | GCKR       | TSS1500          | S_Shore | 0.389±0.096 | 0.234±0.06  | 0.155 | 1.96E-03 | 9.95E-10 | -0.295 |
| cg15062470 | 2  | 27718710  | FNDC4      | TSS1500          | S_Shore | 0.389±0.096 | 0.234±0.06  | 0.155 | 1.96E-03 | 1.48E-09 | -0.292 |
| cg20988073 | 3  | 125900093 | ALDH1L1    | TSS1500          | S_Shore | 0.313±0.116 | 0.158±0.037 | 0.155 | 6.55E-03 | 1.88E-14 | -0.365 |
| cg07869651 | 5  | 177581603 | NHP2       | TSS1500          | S_Shore | 0.46±0.121  | 0.305±0.133 | 0.155 | 1.06E-02 | 5.91E-07 | -0.243 |
| cg13659813 | 19 | 39322968  | ECH1       | TSS1500          | S_Shore | 0.254±0.078 | 0.099±0.035 | 0.155 | 6.10E-04 | 9.96E-09 | -0.278 |
| cg12113740 | 18 | 52625368  | CCDC68     | 5'UTR/1st intron | N_Shore | 0.62±0.16   | 0.465±0.164 | 0.155 | 4.08E-02 | 3.36E-19 | -0.422 |
| cg26760212 | 20 | 62601743  | ZNF512B    | TSS1500          | S_Shore | 0.381±0.1   | 0.227±0.093 | 0.154 | 2.67E-03 | 2.00E-05 | -0.208 |
| cg02034910 | 16 | 67207062  | NOL3       | 5'UTR            | S_Shelf | 0.605±0.074 | 0.451±0.131 | 0.154 | 9.79E-04 | 1.30E-06 | -0.236 |
| cg05017199 | 7  | 150497065 | TMEM176B   | 5'UTR/1st intron | Island  | 0.26±0.1    | 0.106±0.048 | 0.154 | 2.84E-03 | 2.42E-10 | -0.305 |
| cg05017199 | 7  | 150497065 | TMEM176A   | TSS1500          | Island  | 0.26±0.1    | 0.106±0.048 | 0.154 | 2.84E-03 | 3.49E-10 | -0.303 |
| cg00171459 | 7  | 5554215   | FBXL18     | TSS1500          | S_Shore | 0.526±0.092 | 0.372±0.07  | 0.154 | 1.53E-03 | 3.23E-07 | -0.249 |
| cg27650171 | 6  | 30881579  | VAR52      | TSS1500          | Island  | 0.259±0.068 | 0.105±0.042 | 0.154 | 1.71E-04 | 9.77E-10 | -0.295 |
| cg21086870 | 15 | 41836937  | RPAP1      | TSS1500          | S_Shore | 0.665±0.13  | 0.511±0.242 | 0.154 | 4.69E-02 | 2.53E-07 | -0.251 |
| cg17778313 | 19 | 42811489  | PRR19      | 5'UTR/1st intron | S_Shore | 0.746±0.075 | 0.592±0.197 | 0.154 | 8.45E-03 | 6.73E-11 | -0.314 |
| cg00946598 | 1  | 44117093  | KDMA4      | 5'UTR/1st intron | S_Shore | 0.567±0.15  | 0.413±0.164 | 0.154 | 3.6E-02  | 3.63E-09 | -0.285 |
| cg05731808 | 2  | 173293392 | ITGA6      | 5'UTR/1st intron | S_Shore | 0.334±0.121 | 0.181±0.066 | 0.154 | 8.45E-03 | 1.88E-06 | -0.232 |
| cg09596674 | 3  | 46607350  | LRRC2      | 5'UTR/1st intron | Island  | 0.351±0.106 | 0.197±0.127 | 0.154 | 5.36E-03 | 6.35E-22 | -0.450 |
| cg07700644 | 11 | 116663804 | APOA5      | TSS1500          | S_Shelf | 0.554±0.085 | 0.4±0.148   | 0.153 | 3.06E-03 | 1.16E-09 | -0.294 |
| cg02582159 | 16 | 3021099   | PAQR4      | 5'UTR/1st intron | S_Shore | 0.406±0.078 | 0.253±0.067 | 0.153 | 4.33E-04 | 1.20E-06 | -0.237 |
| cg27531553 | 1  | 6615604   | NOL9       | TSS1500          | S_Shore | 0.612±0.066 | 0.459±0.138 | 0.153 | 8.17E-04 | 1.96E-05 | -0.209 |
| cg04306507 | 14 | 55594613  | LGALS3     | TSS1500          | N_Shore | 0.55±0.106  | 0.397±0.145 | 0.153 | 7.11E-03 | 5.06E-06 | -0.223 |
| cg04270652 | 16 | 28608894  | SULT1A2    | TSS1500          | N_Shelf | 0.582±0.168 | 0.429±0.12  | 0.153 | 4.13E-02 | 5.38E-18 | -0.408 |
| cg07804260 | 11 | 2397977   | CD81       | 5'UTR/1st intron | N_Shore | 0.521±0.166 | 0.368±0.158 | 0.153 | 4.61E-02 | 2.69E-14 | -0.363 |
| cg18229134 | 5  | 176516040 | FGFR4      | 5'UTR/1st intron | S_Shore | 0.527±0.155 | 0.374±0.098 | 0.153 | 2.88E-02 | 1.11E-20 | -0.437 |
| cg14101500 | 11 | 2925594   | SLC22A18A5 | TSS1500          | S_Shore | 0.419±0.085 | 0.266±0.056 | 0.153 | 9.73E-04 | 1.09E-11 | -0.326 |
| cg10763288 | 11 | 71158925  | DHCR7      | 5'UTR/1st intron | N_Shore | 0.334±0.076 | 0.182±0.046 | 0.153 | 4.51E-04 | 2.19E-06 | -0.231 |
| cg25017060 | 14 | 103389017 | AMN        | 5'UTR/1st exon   | Island  | 0.297±0.071 | 0.144±0.043 | 0.153 | 2.57E-04 | 1.07E-07 | -0.258 |
| cg08376824 | 20 | 5987738   | CRSL1      | 5'UTR/1st intron | S_Shore | 0.303±0.068 | 0.151±0.044 | 0.153 | 1.78E-04 | 6.13E-09 | -0.281 |
| cg05463325 | 1  | 229406534 | RAB4A      | TSS1500          | N_Shore | 0.421±0.081 | 0.268±0.064 | 0.153 | 6.47E-04 | 8.38E-10 | -0.296 |
| cg05925894 | 1  | 85931301  | DDAH1      | 5'UTR            | S_Shore | 0.295±0.073 | 0.143±0.042 | 0.152 | 3.40E-04 | 1.54E-07 | -0.255 |
| cg25882597 | 20 | 39969542  | LPIN3      | 1st exon         | S_Shore | 0.36±0.082  | 0.207±0.062 | 0.152 | 7.08E-04 | 6.18E-15 | -0.372 |
| cg10672416 | 12 | 123718706 | C12orf65   | 5'UTR/1st intron | S_Shore | 0.408±0.11  | 0.255±0.12  | 0.152 | 6.58E-03 | 8.52E-09 | -0.279 |
| cg05745457 | 4  | 164394816 | TKTL2      | 1st exon         | Island  | 0.816±0.079 | 0.664±0.18  | 0.152 | 6.31E-03 | 1.26E-05 | -0.213 |
| cg26069068 | 8  | 125741265 | MTSS1      | TSS1500          | Island  | 0.392±0.09  | 0.24±0.076  | 0.152 | 1.39E-03 | 1.74E-05 | -0.210 |
| cg14101638 | 12 | 121416612 | HNF1A      | 1st exon         | Island  | 0.493±0.106 | 0.342±0.058 | 0.152 | 4.33E-03 | 6.83E-29 | -0.512 |
| cg02078292 | 11 | 2397655   | CD81       | 5'UTR/1st intron | N_Shore | 0.519±0.155 | 0.368±0.19  | 0.152 | 4.72E-02 | 1.40E-17 | -0.404 |
| cg12571493 | 4  | 174256943 | HMG2B      | TSS1500          | S_Shore | 0.362±0.093 | 0.21±0.084  | 0.152 | 1.88E-03 | 2.98E-09 | -0.287 |
| cg17716930 | 19 | 51017331  | ASPDH      | TSS200           | S_Shelf | 0.371±0.127 | 0.22±0.09   | 0.151 | 1.17E-02 | 1.86E-05 | -0.209 |
| cg10857558 | 4  | 90035421  | TIGD2      | 1st exon         | S_Shelf | 0.343±0.121 | 0.192±0.053 | 0.151 | 9.23E-03 | 7.00E-07 | -0.242 |
| cg02047661 | 3  | 51976883  | PARP3      | 5'UTR/1st intron | S_Shore | 0.359±0.089 | 0.208±0.046 | 0.151 | 1.55E-03 | 1.01E-06 | -0.238 |
| cg23916044 | 11 | 62472988  | BSCL2      | 5'UTR            | N_Shelf | 0.553±0.128 | 0.402±0.132 | 0.151 | 1.54E-02 | 8.43E-17 | -0.395 |
| cg13423770 | 1  | 156338775 | RHBG       | TSS1500          | Island  | 0.36±0.074  | 0.209±0.07  | 0.151 | 2.94E-04 | 9.70E-09 | -0.278 |
| cg06916670 | 1  | 202829945 | LOC148709  | TSS1500          | N_Shore | 0.511±0.108 | 0.359±0.17  | 0.151 | 1.26E-02 | 1.19E-25 | -0.485 |
| cg01566404 | 1  | 204121925 | ETNKG2     | TSS1500          | S_Shore | 0.73±0.074  | 0.579±0.169 | 0.151 | 4.15E-03 | 8.03E-22 | -0.449 |
| cg18344745 | 4  | 157997079 | GLRB       | TSS1500          | N_Shore | 0.471±0.143 | 0.321±0.167 | 0.151 | 3.18E-02 | 7.49E-07 | -0.241 |
| cg14595683 | 8  | 77592946  | ZFXH4      | TSS1500          | S_Shelf | 0.331±0.104 | 0.181±0.081 | 0.151 | 3.86E-03 | 1.98E-17 | -0.402 |
| cg00213123 | 15 | 75019070  | CYP1A1     | TSS1500          | Island  | 0.251±0.107 | 0.101±0.034 | 0.151 | 5.01E-03 | 3.32E-05 | -0.203 |
| cg13891189 | 9  | 116164001 | ALAD       | TSS1500          | S_Shore | 0.325±0.062 | 0.174±0.058 | 0.151 | 6.95E-05 | 2.25E-15 | -0.377 |
| cg24649332 | 20 | 45280359  | SLC13A3    | 5'UTR            | S_Shore | 0.48±0.154  | 0.329±0.113 | 0.151 | 3.12E-02 | 3.12E-07 | -0.249 |
| cg20968678 | 2  | 216948982 | TMEM169    | 5'UTR            | S_Shelf | 0.614±0.099 | 0.463±0.175 | 0.150 | 1.06E-02 | 7.41E-21 | -0.439 |
| cg18908681 | 5  | 115177683 | ATG12      | TSS200           | Island  | 0.449±0.036 | 0.299±0.087 | 0.150 | 2.09E-06 | 1.31E-07 | -0.256 |
| cg00363750 | 19 | 51017311  | ASPDH      | TSS200           | S_Shelf | 0.333±0.118 | 0.183±0.069 | 0.150 | 7.99E-03 | 8.79E-07 | -0.239 |
| cg27578754 | 7  | 11012967  | PHF14      | TSS1500          | N_Shore | 0.513±0.11  | 0.363±0.072 | 0.150 | 5.65E-03 | 6.38E-09 | -0.281 |
| cg05346140 | 17 | 40275057  | HSPB9      | 1st exon         | Island  | 0.516±0.12  | 0.366±0.101 | 0.150 | 9.58E-03 | 1.18E-16 | -0.393 |
| cg16267850 | 1  | 46859791  | FAAH       | TSS200           | Island  | 0.244±0.096 | 0.094±0.035 | 0.150 | 2.78E-03 | 1        |        |

|            |    |           |                  |                  |         |             |             |       |          |          |        |
|------------|----|-----------|------------------|------------------|---------|-------------|-------------|-------|----------|----------|--------|
| cg12893736 | 17 | 72429636  | <i>GPRC5C</i>    | 5'UTR/1st intron | S_Shore | 0.479±0.092 | 0.329±0.138 | 0.150 | 3.87E-03 | 3.85E-23 | -0.462 |
| cg19623519 | 1  | 247276096 | <i>C1orf229</i>  | TSS1500          | N_Shelf | 0.71±0.087  | 0.559±0.162 | 0.150 | 5.60E-03 | 1.68E-09 | -0.291 |
| cg24657085 | 17 | 37860344  | <i>ERBB2</i>     | 5'UTR            | S_Shelf | 0.651±0.106 | 0.501±0.187 | 0.150 | 1.62E-02 | 6.29E-22 | -0.450 |
| cg25526519 | 15 | 91499369  | <i>RCCD1</i>     | 5'UTR            | N_Shore | 0.564±0.144 | 0.414±0.177 | 0.150 | 3.69E-02 | 1.48E-12 | -0.339 |
| cg07100411 | 11 | 64884229  | <i>ZNHIT2</i>    | 1st exon         | S_Shelf | 0.381±0.086 | 0.232±0.057 | 0.150 | 1.20E-03 | 6.38E-07 | -0.242 |
| cg12729838 | 8  | 27469186  | <i>CLU</i>       | 1st exon         | N_Shelf | 0.409±0.095 | 0.259±0.059 | 0.150 | 2.33E-03 | 4.99E-06 | -0.223 |
| cg22707016 | 15 | 41098847  | <i>ZFYVE19</i>   | TSS1500          | N_Shore | 0.709±0.083 | 0.56±0.117  | 0.149 | 1.53E-03 | 1.50E-05 | -0.211 |
| cg05098551 | 2  | 179344725 | <i>PLEKHA3</i>   | TSS1500          | N_Shore | 0.35±0.106  | 0.201±0.126 | 0.149 | 6.43E-03 | 7.66E-06 | -0.218 |
| cg05437692 | 4  | 149362435 | <i>NR3C2</i>     | 5'UTR/1st intron | N_Shore | 0.311±0.101 | 0.162±0.04  | 0.149 | 3.85E-03 | 1.14E-07 | -0.258 |
| cg13410390 | 1  | 155232677 | <i>SCAMP3</i>    | TSS1500          | S_Shore | 0.622±0.091 | 0.472±0.152 | 0.149 | 5.40E-03 | 2.45E-18 | -0.412 |
| cg25417405 | 15 | 50474129  | <i>SLC27A2</i>   | TSS1500          | N_Shore | 0.272±0.085 | 0.123±0.047 | 0.149 | 1.24E-03 | 1.34E-06 | -0.236 |
| cg13503413 | 10 | 60937257  | <i>PHYHIPL</i>   | 5'UTR/1st exon   | S_Shore | 0.256±0.109 | 0.107±0.028 | 0.149 | 5.92E-03 | 7.21E-08 | -0.262 |
| cg08095700 | 3  | 184972153 | <i>EHHADH</i>    | TSS1500          | S_Shore | 0.278±0.091 | 0.13±0.096  | 0.149 | 1.98E-03 | 7.51E-07 | -0.241 |
| cg18808261 | 3  | 18464935  | <i>SATB1</i>     | 5'UTR            | N_Shelf | 0.426±0.148 | 0.278±0.143 | 0.149 | 3.24E-02 | 1.52E-19 | -0.425 |
| cg14295062 | 9  | 139949108 | <i>ENTPD2</i>    | TSS1500          | S_Shore | 0.411±0.095 | 0.263±0.05  | 0.148 | 2.48E-03 | 2.45E-05 | -0.206 |
| cg10559803 | 1  | 178693897 | <i>RALGPS2</i>   | TSS1500          | N_Shore | 0.318±0.083 | 0.17±0.057  | 0.148 | 9.78E-04 | 9.44E-10 | -0.296 |
| cg03547797 | 11 | 22689644  | <i>GAS2</i>      | 5'UTR/1st intron | S_Shore | 0.33±0.091  | 0.181±0.113 | 0.148 | 2.55E-03 | 1.53E-23 | -0.465 |
| cg22590775 | 19 | 49891494  | <i>CCDC155</i>   | 5'UTR/1st exon   | Island  | 0.515±0.112 | 0.366±0.171 | 0.148 | 1.60E-02 | 8.73E-06 | -0.217 |
| cg09423181 | 17 | 55164762  | <i>AKAP1</i>     | 5'UTR            | S_Shore | 0.694±0.158 | 0.546±0.161 | 0.148 | 4.63E-02 | 3.97E-11 | -0.318 |
| cg22446000 | 1  | 247275998 | <i>C1orf229</i>  | TSS1500          | N_Shelf | 0.612±0.096 | 0.464±0.169 | 0.148 | 9.72E-03 | 2.71E-15 | -0.376 |
| cg02310386 | 12 | 103311761 | <i>PAH</i>       | 5'UTR/1st intron | S_Shore | 0.309±0.073 | 0.161±0.043 | 0.148 | 4.40E-04 | 3.43E-08 | -0.268 |
| cg00244776 | 6  | 30883192  | <i>VARS2</i>     | 5'UTR            | S_Shore | 0.472±0.073 | 0.325±0.128 | 0.147 | 1.23E-03 | 2.02E-07 | -0.253 |
| cg25027125 | 14 | 35182801  | <i>CFL2</i>      | 5'UTR/1st intron | N_Shore | 0.27±0.102  | 0.122±0.065 | 0.147 | 3.89E-03 | 1.61E-24 | -0.474 |
| cg10840135 | 22 | 42526619  | <i>CYP2D6</i>    | 1st exon         | S_Shore | 0.462±0.071 | 0.315±0.097 | 0.147 | 3.87E-04 | 1.12E-10 | -0.311 |
| cg12464638 | 11 | 844400    | <i>TSPAN4</i>    | 5'UTR/1st intron | S_Shore | 0.381±0.108 | 0.234±0.146 | 0.147 | 1.00E-02 | 9.11E-13 | -0.342 |
| cg04338134 | 16 | 66969401  | <i>CES2</i>      | 5'UTR/1st exon   | N_Shore | 0.287±0.081 | 0.139±0.054 | 0.147 | 9.00E-04 | 9.25E-16 | -0.382 |
| cg26104196 | 1  | 159914191 | <i>IGSF9</i>     | 5'UTR/1st intron | N_Shore | 0.524±0.112 | 0.377±0.16  | 0.147 | 1.46E-02 | 3.72E-14 | -0.361 |
| cg02449103 | 6  | 31627711  | <i>C6orf47</i>   | 1st exon         | N_Shore | 0.246±0.101 | 0.099±0.05  | 0.147 | 3.97E-03 | 3.91E-11 | -0.318 |
| cg15803221 | 17 | 38473166  | <i>RARA</i>      | 5'UTR/1st intron | Island  | 0.506±0.078 | 0.359±0.089 | 0.147 | 6.89E-04 | 1.69E-07 | -0.254 |
| cg27539986 | 1  | 6664103   | <i>KLHL21</i>    | TSS1500          | S_Shore | 0.21±0.091  | 0.063±0.036 | 0.147 | 2.20E-03 | 3.68E-05 | -0.202 |
| cg05955436 | 20 | 17660838  | <i>RBBP1</i>     | 5'UTR/1st intron | N_Shore | 0.306±0.147 | 0.159±0.115 | 0.147 | 2.99E-02 | 6.00E-12 | -0.330 |
| cg04525852 | 4  | 125632538 | <i>ANKRD50</i>   | 5'UTR/1st intron | N_Shore | 0.32±0.115  | 0.173±0.159 | 0.147 | 1.61E-02 | 4.67E-09 | -0.284 |
| cg18068140 | 6  | 18123164  | <i>NHLRC1</i>    | TSS1500          | S_Shore | 0.457±0.086 | 0.311±0.143 | 0.146 | 3.95E-03 | 5.81E-13 | -0.345 |
| cg24526899 | 14 | 54424149  | <i>BMP4</i>      | TSS1500          | S_Shore | 0.673±0.074 | 0.527±0.215 | 0.146 | 1.73E-02 | 2.07E-22 | -0.455 |
| cg24203376 | 10 | 115938868 | <i>TDRD1</i>     | TSS1500          | N_Shore | 0.744±0.049 | 0.598±0.186 | 0.146 | 5.38E-03 | 4.15E-08 | -0.266 |
| cg07940714 | 19 | 40024949  | <i>EID2B</i>     | TSS1500          | S_Shore | 0.638±0.06  | 0.492±0.127 | 0.146 | 5.35E-04 | 1.32E-05 | -0.213 |
| cg25170091 | 17 | 202716    | <i>RPH3AL</i>    | TSS200           | N_Shelf | 0.236±0.081 | 0.09±0.032  | 0.146 | 1.18E-03 | 2.33E-05 | -0.207 |
| cg12352315 | 17 | 74069707  | <i>SRP68</i>     | TSS1500          | S_Shore | 0.778±0.078 | 0.632±0.202 | 0.146 | 1.40E-02 | 3.98E-05 | -0.201 |
| cg24812103 | 8  | 101735630 | <i>PABPC1</i>    | TSS1500          | S_Shore | 0.401±0.137 | 0.256±0.181 | 0.146 | 3.69E-02 | 1.34E-09 | -0.293 |
| cg14518948 | 5  | 68484768  | <i>CENPH</i>     | TSS1500          | N_Shore | 0.47±0.121  | 0.324±0.146 | 0.146 | 1.74E-02 | 4.21E-05 | -0.200 |
| cg04104489 | 1  | 64063351  | <i>PGM1</i>      | 5'UTR/1st intron | S_Shelf | 0.708±0.048 | 0.562±0.152 | 0.146 | 1.28E-03 | 1.35E-18 | -0.415 |
| cg15162922 | 5  | 132162758 | <i>SHROOM1</i>   | 5'UTR            | S_Shore | 0.81±0.054  | 0.665±0.156 | 0.146 | 1.87E-03 | 2.49E-32 | -0.538 |
| cg01394199 | 12 | 121416547 | <i>HNF1A</i>     | 5'UTR/1st exon   | Island  | 0.554±0.108 | 0.408±0.056 | 0.145 | 6.10E-03 | 9.74E-23 | -0.458 |
| cg20248866 | 17 | 79869748  | <i>PCYT2</i>     | TSS1500          | Island  | 0.416±0.125 | 0.27±0.161  | 0.145 | 2.31E-02 | 2.73E-07 | -0.250 |
| cg19409187 | 6  | 123109903 | <i>SMPDL3A</i>   | TSS1500          | N_Shore | 0.269±0.101 | 0.123±0.04  | 0.145 | 4.27E-03 | 2.89E-05 | -0.204 |
| cg25823085 | 7  | 87105416  | <i>ABCB4</i>     | TSS1500          | S_Shore | 0.427±0.133 | 0.281±0.195 | 0.145 | 3.95E-02 | 2.38E-29 | -0.516 |
| cg23596673 | 6  | 24491098  | <i>GPLD1</i>     | TSS1500          | N_Shelf | 0.809±0.061 | 0.664±0.251 | 0.145 | 3.11E-02 | 1.29E-06 | -0.236 |
| cg27119222 | 11 | 2720229   | <i>KCNQ1OT1</i>  | 1st exon         | N_Shore | 0.506±0.057 | 0.361±0.176 | 0.145 | 4.39E-03 | 5.33E-10 | -0.300 |
| cg16988185 | 17 | 77705025  | <i>ENPP7</i>     | 1st exon         | N_Shelf | 0.574±0.103 | 0.429±0.086 | 0.145 | 4.78E-03 | 2.45E-23 | -0.464 |
| cg24984312 | 11 | 116707209 | <i>APOA1</i>     | 5'UTR            | S_Shore | 0.367±0.108 | 0.222±0.041 | 0.145 | 6.16E-03 | 5.03E-06 | -0.223 |
| cg01953240 | 16 | 1129666   | <i>SSTR5</i>     | 1st exon         | Island  | 0.847±0.068 | 0.702±0.179 | 0.145 | 6.44E-03 | 6.47E-09 | -0.281 |
| cg25598083 | 14 | 74034893  | <i>ACOT2</i>     | TSS1500          | N_Shore | 0.397±0.114 | 0.252±0.08  | 0.145 | 8.51E-03 | 1.89E-06 | -0.232 |
| cg26989053 | 16 | 15148607  | <i>NTAN1</i>     | 5'UTR/1st intron | N_Shore | 0.614±0.134 | 0.469±0.132 | 0.145 | 2.34E-02 | 3.93E-09 | -0.285 |
| cg27395922 | 11 | 50257633  | <i>LOC441601</i> | 1st exon         | Island  | 0.576±0.099 | 0.431±0.171 | 0.145 | 1.27E-02 | 9.55E-12 | -0.327 |
| cg04862321 | 6  | 30580928  | <i>PPP1R10</i>   | 5'UTR            | N_Shelf | 0.32±0.088  | 0.175±0.091 | 0.145 | 1.77E-03 | 2.32E-05 | -0.207 |
| cg02124724 | 21 | 46875142  | <i>COL18A1</i>   | TSS1500          | N_Shore | 0.469±0.095 | 0.324±0.059 | 0.145 | 2.92E-03 | 2.73E-09 | -0.288 |
| cg23591595 | 17 | 18528638  | <i>CCDC144B</i>  | 1st exon         | Island  | 0.754±0.082 | 0.609±0.1   | 0.145 | 1.29E-03 | 2.48E-10 | -0.305 |
| cg10661769 | 6  | 30881484  | <i>VARS2</i>     | TSS1500          | N_Shore | 0.227±0.109 | 0.082±0.043 | 0.145 | 6.69E-03 | 5.39E-06 | -0.222 |
| cg01035826 | 11 | 125494680 | <i>CHEK1</i>     | TSS1500          | N_Shore | 0.642±0.109 | 0.497±0.2   | 0.145 | 2.58E-02 | 1.20E-09 | -0.294 |
| cg09715285 | 2  | 220108267 | <i>GLB1L</i>     | 1st exon         | N_Shore | 0.443±0.111 | 0.299±0.16  | 0.144 | 1.57E-02 | 2.29E-11 | -0.322 |
| cg01084740 | 14 | 61748243  | <i>TMEM30B</i>   | 5'UTR/1st exon   | S_Shore | 0.343±0.086 | 0.199±0.053 | 0.144 | 1.52E-03 | 1.37E-13 | -0.354 |
| cg27451508 | 17 | 19652257  | <i>ALDH3A1</i>   | TSS1500          | S_Shelf | 0.695±0.149 | 0.551±0.161 | 0.144 | 4.28E-02 | 2.17E-18 | -0.413 |
| cg07320140 | 16 | 75150611  | <i>LDHD</i>      | 1st exon         | S_Shore | 0.249±0.076 | 0.105±0.04  | 0.144 | 7.31E-04 | 1.62E-05 | -0.211 |
| cg23906067 | 6  | 31939112  | <i>STK19</i>     | TSS1500          | N_Shore | 0.383±0.088 | 0.239±0.067 | 0.144 | 1.81E-03 | 8.77E-07 | -0.239 |
| cg27455017 | 7  | 150037988 | <i>RARRES2</i>   | 5'UTR/1st intron | Island  | 0.391±0.064 | 0.247±0.051 | 0.144 | 1.42E-04 | 7.51E-06 | -0.219 |
| cg12598950 | 17 | 77704916  | <i>ENPP7</i>     | 1st exon         | N_Shelf | 0.413±0.107 | 0.269±0.078 | 0.144 | 6.26E-03 | 2.72E-12 | -0.335 |
| cg18664866 | 14 | 75389200  | <i>RPS6KL1</i>   | TSS200           | N_Shore | 0.788±0.048 | 0.644±0.151 | 0.144 | 1.37E-03 | 2.26E-23 | -0.464 |
| cg00910127 | 6  | 44281749  | <i>AARS2</i>     | TSS1500          | S_Shore | 0.295±0.079 | 0.151±0.053 | 0.144 | 8.50E-04 | 4.29E-14 | -0.361 |
| cg21535580 | 1  | 204121899 | <i>ETNK2</i>     | TSS1500          | S_Shore | 0.584±0.092 | 0.441±0.141 | 0.144 | 5.75E-03 | 4.02E-30 | -0.522 |
| cg19632760 | 8  | 71581729  | <i>XKR9</i>      | 5'UTR/1st exon   | S_Shore | 0.34±0.117  | 0.197±0.047 | 0.144 | 9.99E-03 | 3.84E-13 | -0.348 |
| cg19632760 | 8  | 71581729  | <i>LACTB2</i>    | TSS1500          | S_Shore | 0.34±0.117  | 0.197±0.047 | 0.144 | 9.99E-03 | 2.79E-08 | -0.269 |
| cg03337886 | 13 | 110436740 | <i>IRS2</i>      | 1st exon         | Island  | 0.639±0.095 | 0.496±0.162 | 0.144 | 9.80E-03 | 5.43E-09 | -0.282 |
| cg18555698 | 11 | 12699172  | <i>TEAD1</i>     | 5'UTR            | S_Shelf | 0.741±0.119 | 0.598±0.216 | 0.144 | 4.04E-02 | 1.20E-09 | -0.294 |
| cg00206463 | 6  | 30179435  | <i>TRIM26</i>    | 5'UTR/1st intron | N_Shore | 0.308±0.071 | 0.164±0.057 | 0.143 | 3.73E-04 | 4.20E-17 | -0.398 |
| cg06848073 | 1  | 11713540  | <i>FBXO44</i>    | TSS1500          | N_Shore | 0.511±0.065 | 0.368±0.147 | 0.143 | 2.07E-03 | 7.78E-14 | -0.357 |
| cg20845050 | 8  | 146053666 | <i>ZNF7</i>      | 5'UTR/1st intron | S_Shore | 0.333±0.134 | 0.19±0.063  | 0.143 | 1.95E-02 | 3.31E-15 | -0.375 |
| cg17797591 | 17 | 63555244  | <i>AXIN2</i>     | 5'UTR/1st intron | N_Shore | 0.391±0.136 | 0.247±0.187 | 0.143 | 4.11E-02 | 2.28E-23 | -0.464 |
| cg12554573 | 3  | 51976667  | <i>PARP3</i>     | 5'UTR/1st exon   | S_Shore | 0.351±0.099 | 0.208±0.047 | 0.143 | 4.14E-03 | 3.35E-11 | -0.319 |
| cg08784247 | 12 | 81329808  | <i>LIN7A</i>     | 5'UTR/1st intron | N_Shore | 0.294±0.096 | 0.151±0.047 | 0.143 | 3.47E-03 | 9.55E-06 | -0.216 |
| cg15711987 | 10 | 99393886  | <i>MORN4</i>     | 5'UTR/1st exon   | S_Shore | 0.566±0.087 | 0.424±0.228 | 0.143 | 2.97E-02 | 3.32E-08 | -0.268 |
| cg13841742 | 4  | 48909110  | <i>OCIAD2</i>    | TSS1500          | S_Shore | 0.353±0.09  | 0.211±0.043 | 0.142 | 2.43E-03 | 8.38E-27 | -0.495 |
| cg27191921 | 22 | 43042910  | <i>CYB5R3</i>    | 5'UTR/1st exon   | N_Shelf | 0.371±0.1   | 0.229±0.109 | 0.142 | 5.56E-03 | 1.96E-05 | -0.209 |
| cg15890754 | 2  | 173294093 | <i>ITGA6</i>     | 5'UTR/1st intron | S_Shore | 0.291±0.085 | 0.148±0.1   | 0.142 | 1.84E-03 | 2.11E-09 | -0.290 |
| cg05256304 | 11 | 116969870 | <i>SIK3</i>      | TSS1500          | S_Shore | 0.305±0.113 | 0.162±0.115 | 0.142 | 1.10E-02 | 1.77E-08 | -0.273 |
| cg16975639 | 2  | 233501753 | <i>EFHD1</i>     | 5'UTR/1st intron |         |             |             |       |          |          |        |

|            |    |           |           |                  |         |             |             |       |          |          |        |
|------------|----|-----------|-----------|------------------|---------|-------------|-------------|-------|----------|----------|--------|
| cg21433933 | 5  | 132163083 | SHROOM1   | 5'UTR            | S_Shore | 0.74±0.054  | 0.598±0.126 | 0.142 | 4.99E-04 | 6.20E-27 | -0.496 |
| cg14404746 | 9  | 140116137 | RNF208    | TSS1500          | S_Shore | 0.326±0.104 | 0.185±0.071 | 0.142 | 5.63E-03 | 2.28E-05 | -0.207 |
| cg06788278 | 1  | 178693891 | RALGPS2   | TSS1500          | N_Shore | 0.318±0.079 | 0.176±0.052 | 0.142 | 9.41E-04 | 3.20E-09 | -0.286 |
| cg15821095 | 3  | 51428079  | RBM15B    | TSS1500          | N_Shelf | 0.542±0.081 | 0.4±0.163   | 0.142 | 6.82E-03 | 6.30E-08 | -0.263 |
| cg03449125 | 11 | 76779064  | CAPN5     | 5'UTR/1st intron | S_Shore | 0.535±0.137 | 0.393±0.134 | 0.142 | 2.92E-02 | 1.32E-25 | -0.484 |
| cg10488031 | 13 | 110437561 | IRS2      | 1st exon         | Island  | 0.4±0.098   | 0.258±0.059 | 0.142 | 3.95E-03 | 1.66E-08 | -0.274 |
| cg08204159 | 19 | 54642290  | CNOT3     | 5'UTR/1st intron | Island  | 0.33±0.103  | 0.188±0.075 | 0.141 | 5.45E-03 | 8.07E-06 | -0.218 |
| cg01057656 | 19 | 45281140  | CBLC      | 5'UTR/1st exon   | Island  | 0.178±0.088 | 0.037±0.03  | 0.141 | 2.44E-03 | 6.63E-07 | -0.242 |
| cg24058132 | 14 | 88459866  | GALC      | 5'UTR/1st exon   | S_Shore | 0.383±0.144 | 0.242±0.128 | 0.141 | 3.40E-02 | 2.54E-13 | -0.350 |
| cg03035746 | 2  | 74727286  | LBX2      | TSS1500          | N_Shelf | 0.857±0.041 | 0.715±0.187 | 0.141 | 6.31E-03 | 1.90E-33 | -0.546 |
| cg00258873 | 6  | 30312687  | PPP2      | TSS1500          | N_Shore | 0.357±0.119 | 0.216±0.077 | 0.141 | 1.22E-02 | 7.40E-09 | -0.280 |
| cg16717713 | 14 | 100069657 | CCDC85C   | 1st exon         | Island  | 0.269±0.089 | 0.128±0.043 | 0.141 | 2.36E-03 | 3.48E-05 | -0.202 |
| cg12413156 | 20 | 62368256  | LIME1     | 5'UTR/1st intron | N_Shore | 0.582±0.117 | 0.44±0.188  | 0.141 | 3.00E-02 | 1.41E-25 | -0.484 |
| cg07150062 | 14 | 104552032 | ASPG      | 5'UTR/1st exon   | Island  | 0.229±0.122 | 0.088±0.105 | 0.141 | 1.52E-02 | 7.45E-07 | -0.241 |
| cg22534105 | 1  | 12078836  | MIIP      | TSS1500          | N_Shore | 0.676±0.139 | 0.535±0.187 | 0.141 | 4.67E-02 | 3.18E-06 | -0.227 |
| cg10761315 | 14 | 104552034 | ASPG      | 5'UTR/1st exon   | Island  | 0.245±0.116 | 0.104±0.075 | 0.141 | 1.06E-02 | 5.28E-06 | -0.222 |
| cg18849169 | 5  | 150399781 | GXP3      | TSS200           | N_Shore | 0.558±0.135 | 0.417±0.151 | 0.141 | 3.19E-02 | 7.67E-06 | -0.218 |
| cg16913124 | 3  | 50338253  | HYAL3     | TSS1500          | S_Shore | 0.861±0.018 | 0.721±0.168 | 0.141 | 2.52E-03 | 4.24E-07 | -0.246 |
| cg14977069 | 20 | 62367698  | LIME1     | 5'UTR/1st intron | N_Shore | 0.666±0.079 | 0.526±0.16  | 0.141 | 6.36E-03 | 4.39E-22 | -0.451 |
| cg20307496 | 22 | 37955927  | CDC42EP1  | TSS1500          | N_Shore | 0.574±0.102 | 0.433±0.12  | 0.141 | 7.36E-03 | 7.68E-12 | -0.329 |
| cg16469223 | 3  | 184095245 | THPO      | 5'UTR            | N_Shelf | 0.616±0.066 | 0.476±0.134 | 0.140 | 1.52E-03 | 2.53E-29 | -0.515 |
| cg15117516 | 10 | 72576586  | SGPL1     | 5'UTR            | S_Shore | 0.371±0.11  | 0.23±0.104  | 0.140 | 9.34E-03 | 1.26E-05 | -0.213 |
| cg20987431 | 8  | 124284393 | ZHX1      | 5'UTR/1st intron | N_Shore | 0.306±0.132 | 0.166±0.066 | 0.140 | 2.00E-02 | 7.55E-14 | -0.357 |
| cg09523691 | 5  | 115178810 | AP3S1     | 5'UTR/1st intron | S_Shore | 0.273±0.077 | 0.133±0.043 | 0.140 | 8.94E-04 | 1.36E-07 | -0.256 |
| cg09523691 | 5  | 115178810 | ATG12     | TSS1500          | S_Shore | 0.273±0.077 | 0.133±0.043 | 0.140 | 8.94E-04 | 9.13E-07 | -0.239 |
| cg21601837 | 3  | 125900065 | ALDH1L1   | TSS1500          | S_Shore | 0.234±0.13  | 0.094±0.028 | 0.140 | 1.86E-02 | 1.43E-14 | -0.367 |
| cg24754336 | 20 | 61494027  | TCFL5     | TSS1500          | S_Shore | 0.425±0.133 | 0.285±0.138 | 0.140 | 2.84E-02 | 6.87E-06 | -0.220 |
| cg08830139 | 5  | 140013652 | CD14      | TSS1500          | S_Shore | 0.564±0.108 | 0.424±0.167 | 0.140 | 1.92E-02 | 4.51E-09 | -0.284 |
| cg26233209 | 5  | 115178764 | AP3S1     | 5'UTR/1st intron | S_Shore | 0.253±0.073 | 0.113±0.045 | 0.140 | 6.44E-04 | 2.10E-06 | -0.231 |
| cg26233209 | 5  | 115178764 | ATG12     | TSS1500          | S_Shore | 0.253±0.073 | 0.113±0.045 | 0.140 | 6.44E-04 | 1.53E-05 | -0.211 |
| cg16190718 | 6  | 31939106  | STK19     | TSS1500          | N_Shore | 0.387±0.084 | 0.247±0.068 | 0.140 | 1.61E-03 | 3.08E-05 | -0.204 |
| cg15142477 | 18 | 43915662  | RNF165    | 5'UTR/1st intron | S_Shore | 0.391±0.064 | 0.251±0.158 | 0.139 | 3.97E-03 | 7.47E-08 | -0.261 |
| cg25341653 | 16 | 67233277  | ELMO3     | 1st exon         | Island  | 0.623±0.075 | 0.484±0.153 | 0.139 | 4.71E-03 | 3.70E-17 | -0.399 |
| cg14322224 | 1  | 85931226  | DDAH1     | 5'UTR            | S_Shore | 0.262±0.067 | 0.123±0.04  | 0.139 | 3.67E-04 | 6.24E-07 | -0.243 |
| cg00622166 | 16 | 46919021  | GPT2      | TSS200           | S_Shore | 0.27±0.075  | 0.13±0.036  | 0.139 | 8.95E-04 | 2.23E-15 | -0.377 |
| cg07792006 | 1  | 20511417  | UBXN10    | TSS1500          | N_Shore | 0.587±0.053 | 0.448±0.083 | 0.139 | 4.80E-05 | 8.11E-19 | -0.418 |
| cg02478149 | 22 | 38219117  | GALR3     | TSS1500          | N_Shore | 0.402±0.076 | 0.263±0.089 | 0.139 | 9.19E-04 | 2.20E-05 | -0.207 |
| cg23661013 | 12 | 121415506 | HNF1A     | TSS1500          | N_Shore | 0.506±0.15  | 0.367±0.15  | 0.139 | 4.76E-02 | 1.39E-09 | -0.293 |
| cg00978570 | 1  | 16303299  | ZBTB17    | TSS1500          | S_Shore | 0.513±0.055 | 0.374±0.144 | 0.139 | 1.67E-03 | 5.25E-12 | -0.331 |
| cg15349474 | 11 | 125494878 | CHEK1     | TSS1500          | N_Shore | 0.674±0.1   | 0.535±0.169 | 0.138 | 1.67E-02 | 1.43E-06 | -0.235 |
| cg08733482 | 4  | 111395729 | ENPEP     | TSS1500          | N_Shore | 0.469±0.153 | 0.331±0.123 | 0.138 | 4.56E-02 | 1.00E-13 | -0.356 |
| cg19424531 | 8  | 65711522  | CYP7B1    | TSS200           | Island  | 0.216±0.127 | 0.078±0.085 | 0.138 | 1.83E-02 | 5.75E-14 | -0.359 |
| cg10628205 | 1  | 61547131  | NFIA      | TSS1500          | N_Shore | 0.243±0.085 | 0.105±0.035 | 0.138 | 2.09E-03 | 1.06E-12 | -0.341 |
| cg26162794 | 17 | 18528568  | CCDC144B  | 1st exon         | Island  | 0.818±0.074 | 0.68±0.141  | 0.138 | 3.30E-03 | 8.09E-12 | -0.328 |
| cg04871131 | 7  | 94954202  | PON1      | TSS200           | S_Shore | 0.489±0.126 | 0.351±0.189 | 0.138 | 4.08E-02 | 2.93E-17 | -0.400 |
| cg18428265 | 2  | 101437805 | NPAS2     | 5'UTR/1st intron | S_Shore | 0.384±0.116 | 0.246±0.106 | 0.138 | 1.34E-02 | 2.28E-16 | -0.389 |
| cg24757346 | 19 | 35629022  | FXYD1     | TSS1500          | N_Shelf | 0.691±0.089 | 0.554±0.178 | 0.138 | 1.50E-02 | 1.59E-24 | -0.475 |
| cg10534904 | 14 | 65438215  | RAB15     | 5'UTR/1st intron | N_Shore | 0.286±0.098 | 0.149±0.085 | 0.138 | 4.87E-03 | 3.13E-05 | -0.204 |
| cg10549831 | 10 | 5488366   | NET1      | TSS200           | N_Shore | 0.234±0.094 | 0.097±0.04  | 0.137 | 4.01E-03 | 1.17E-06 | -0.237 |
| cg10589385 | 1  | 150898437 | SETDB1    | TSS1500          | N_Shore | 0.396±0.107 | 0.258±0.15  | 0.137 | 1.58E-02 | 1.81E-08 | -0.273 |
| cg04779796 | 3  | 11037353  | SLC6A1    | 5'UTR/1st intron | S_Shore | 0.629±0.096 | 0.492±0.162 | 0.137 | 1.35E-02 | 9.42E-31 | -0.526 |
| cg22517740 | 1  | 228870629 | RHOJ      | TSS200           | N_Shore | 0.293±0.078 | 0.156±0.081 | 0.137 | 1.09E-03 | 8.34E-15 | -0.370 |
| cg24868305 | 1  | 225998730 | EPHX1     | 5'UTR/1st intron | S_Shore | 0.26±0.088  | 0.123±0.045 | 0.137 | 2.58E-03 | 1.00E-11 | -0.327 |
| cg25477769 | 12 | 121416566 | HNF1A     | 5'UTR/1st exon   | Island  | 0.574±0.098 | 0.437±0.045 | 0.137 | 4.88E-03 | 3.53E-23 | -0.462 |
| cg07697276 | 4  | 53025     | ZNF595    | TSS200           | N_Shore | 0.421±0.057 | 0.284±0.084 | 0.137 | 1.02E-04 | 3.83E-26 | -0.489 |
| cg13696409 | 9  | 73030641  | KLF9      | TSS1500          | S_Shore | 0.811±0.034 | 0.675±0.123 | 0.137 | 2.55E-04 | 6.75E-13 | -0.344 |
| cg00259046 | 11 | 50257771  | LOC441601 | TSS200           | Island  | 0.559±0.118 | 0.423±0.131 | 0.136 | 1.93E-02 | 1.88E-14 | -0.365 |
| cg07190921 | 16 | 1845113   | IGFALS    | TSS1500          | S_Shelf | 0.796±0.125 | 0.659±0.19  | 0.136 | 4.25E-02 | 4.78E-10 | -0.301 |
| cg24516516 | 8  | 19678013  | INTS10    | 5'UTR            | S_Shelf | 0.691±0.126 | 0.555±0.189 | 0.136 | 4.30E-02 | 1.20E-11 | -0.326 |
| cg14893129 | 8  | 78152051  | CARD14    | 5'UTR            | N_Shelf | 0.813±0.045 | 0.677±0.146 | 0.136 | 1.55E-03 | 5.73E-06 | -0.221 |
| cg25463749 | 6  | 119401102 | FAM184A   | 5'UTR/1st intron | S_Shore | 0.576±0.083 | 0.439±0.14  | 0.136 | 5.52E-03 | 4.72E-10 | -0.301 |
| cg01455178 | 1  | 205648187 | SLC45A3   | 5'UTR/1st intron | N_Shore | 0.595±0.083 | 0.459±0.21  | 0.136 | 2.66E-02 | 1.72E-20 | -0.435 |
| cg18898325 | 22 | 42394382  | WBP2NL    | TSS1500          | N_Shore | 0.411±0.076 | 0.276±0.111 | 0.136 | 1.78E-03 | 6.24E-10 | -0.299 |
| cg08535938 | 1  | 161128985 | USP21     | TSS1500          | N_Shore | 0.323±0.08  | 0.187±0.06  | 0.136 | 1.32E-03 | 1.44E-09 | -0.292 |
| cg26651122 | 16 | 56641777  | MT2A      | TSS1500          | N_Shore | 0.385±0.044 | 0.249±0.062 | 0.135 | 4.22E-06 | 1.27E-10 | -0.310 |
| cg14834653 | 10 | 123353791 | FGFR2     | 5'UTR/1st intron | N_Shelf | 0.746±0.115 | 0.611±0.172 | 0.135 | 2.88E-02 | 7.32E-15 | -0.371 |
| cg27492942 | 17 | 36885965  | CISD3     | TSS1500          | N_Shore | 0.274±0.084 | 0.139±0.044 | 0.135 | 2.14E-03 | 4.03E-06 | -0.225 |
| cg12069042 | 3  | 48466700  | PLXNB1    | 5'UTR            | N_Shelf | 0.556±0.089 | 0.421±0.127 | 0.135 | 5.88E-03 | 1.61E-24 | -0.474 |
| cg06099465 | 17 | 1631034   | WDR81     | 1st exon         | S_Shore | 0.629±0.126 | 0.494±0.154 | 0.135 | 3.12E-02 | 8.46E-07 | -0.240 |
| cg07208344 | 7  | 150499362 | TMEM176B  | TSS1500          | S_Shore | 0.665±0.109 | 0.53±0.147  | 0.135 | 1.77E-02 | 2.77E-20 | -0.433 |
| cg20136951 | 1  | 2345400   | PEX10     | TSS1500          | S_Shore | 0.364±0.069 | 0.229±0.04  | 0.135 | 5.26E-04 | 1.12E-06 | -0.237 |
| cg14386312 | 19 | 58740861  | ZNF544    | 5'UTR            | S_Shore | 0.432±0.071 | 0.297±0.095 | 0.135 | 8.21E-04 | 1.83E-17 | -0.402 |
| cg02864688 | 1  | 11752342  | MAD2L2    | TSS1500          | Island  | 0.387±0.113 | 0.253±0.108 | 0.135 | 1.38E-02 | 2.14E-05 | -0.208 |
| cg15335139 | 3  | 50242325  | SLC38A3   | TSS1500          | N_Shore | 0.383±0.091 | 0.248±0.109 | 0.135 | 4.85E-03 | 3.39E-41 | -0.597 |
| cg09616053 | 16 | 2256512   | MLST8     | 5'UTR            | S_Shore | 0.629±0.077 | 0.495±0.149 | 0.135 | 5.97E-03 | 9.75E-08 | -0.259 |
| cg11953516 | 2  | 27719501  | GCKR      | TSS1500          | S_Shore | 0.236±0.092 | 0.101±0.029 | 0.135 | 4.02E-03 | 2.46E-05 | -0.206 |
| cg16691944 | 3  | 44519652  | ZNF445    | TSS1500          | S_Shore | 0.496±0.119 | 0.361±0.157 | 0.135 | 2.71E-02 | 1.06E-10 | -0.311 |
| cg12599673 | 15 | 71408847  | CT62      | TSS1500          | S_Shore | 0.443±0.112 | 0.309±0.151 | 0.134 | 2.11E-02 | 5.71E-07 | -0.243 |
| cg11738921 | 7  | 1753396   | ELFN1     | 5'UTR/1st intron | N_Shore | 0.367±0.069 | 0.233±0.062 | 0.134 | 4.46E-04 | 1.13E-09 | -0.294 |
| cg17017284 | 1  | 161128717 | USP21     | TSS1500          | N_Shore | 0.439±0.113 | 0.304±0.154 | 0.134 | 2.30E-02 | 6.27E-09 | -0.281 |
| cg16300509 | 10 | 102280155 | SEC31B    | TSS1500          | S_Shore | 0.85±0.043  | 0.716±0.173 | 0.134 | 5.70E-03 | 3.41E-09 | -0.286 |
| cg20682326 | 7  | 100844173 | MOGAT3    | 5'UTR/1st exon   | N_Shore | 0.312±0.094 | 0.178±0.059 | 0.134 | 4.23E-03 | 4.84E-10 | -0.300 |
| cg00618323 | 5  | 176515533 | FGFR4     | 5'UTR/1st intron | S_Shore | 0.318±0.082 | 0.184±0.043 | 0.134 | 1.88E-03 | 3.31E-13 | -0.348 |
| cg22580353 | 19 | 45146900  | PVR       | TSS200           | N_Shore | 0.331±0.066 | 0.197±0.078 | 0.134 | 3.90E-04 | 4.21E-05 | -0.200 |
| cg13779868 | 10 | 5488436   | NET1      | TSS200           | N_Shore | 0.234±0.11  | 0.1±0.043   | 0.134 | 1.03E-02 | 5.00E-07 | -0.245 |
| cg12079303 | 1  | 61547163  | NFIA      | TSS1500          | N_Shore | 0.21±0.084  | 0.077±0.031 | 0.133 | 2.51E-03 | 4.00E-12 | -0.333 |
| cg12718440 | 10 | 99393576  | MORN4     | 5'UTR/1st intron | S_Shore | 0.381±0.113 | 0.248±0.182 | 0.133 | 3.33E-02 | 2        |        |

|             |    |           |                  |                  |         |             |             |       |          |          |        |
|-------------|----|-----------|------------------|------------------|---------|-------------|-------------|-------|----------|----------|--------|
| cg03109701  | 12 | 117174758 | <i>RNFT2</i>     | TSS1500          | N_Shore | 0.419±0.099 | 0.286±0.09  | 0.133 | 6.53E-03 | 1.19E-05 | -0.214 |
| cg14038878  | 9  | 86431343  | <i>GKAP1</i>     | 5'UTR            | N_Shore | 0.395±0.107 | 0.262±0.078 | 0.133 | 9.42E-03 | 1.72E-12 | -0.338 |
| cg00621899  | 7  | 100486423 | <i>UFSP1</i>     | 1st exon/3'UTR   | S_Shore | 0.596±0.075 | 0.463±0.16  | 0.133 | 8.09E-03 | 8.74E-07 | -0.239 |
| cg00372249  | 4  | 185745711 | <i>ACSL1</i>     | 5'UTR/1st intron | N_Shore | 0.389±0.136 | 0.256±0.071 | 0.133 | 2.83E-02 | 3.20E-11 | -0.319 |
| cg03368690  | 16 | 27281055  | <i>NSMCE1</i>    | TSS1500          | S_Shore | 0.798±0.028 | 0.665±0.199 | 0.133 | 1.22E-02 | 6.60E-07 | -0.242 |
| cg06911974  | 5  | 172260464 | <i>ERGIC1</i>    | TSS1500          | N_Shore | 0.702±0.111 | 0.569±0.175 | 0.133 | 2.92E-02 | 1.23E-10 | -0.310 |
| cg14981637  | 1  | 95287127  | <i>SLC44A3</i>   | 5'UTR/1st intron | S_Shore | 0.458±0.113 | 0.325±0.146 | 0.133 | 2.19E-02 | 5.61E-13 | -0.345 |
| cg26763362  | 17 | 18266135  | <i>SHMT1</i>     | 5'UTR/1st intron | N_Shore | 0.256±0.076 | 0.123±0.027 | 0.133 | 1.41E-03 | 3.29E-05 | -0.203 |
| cg07845392  | 17 | 79678158  | <i>SLC25A10</i>  | TSS1500          | S_Shelf | 0.383±0.092 | 0.25±0.145  | 0.133 | 1.03E-02 | 4.92E-12 | -0.332 |
| cg27203641  | 17 | 40275359  | <i>HSPB9</i>     | 1st exon/3'UTR   | Island  | 0.573±0.136 | 0.44±0.103  | 0.133 | 3.18E-02 | 8.86E-20 | -0.428 |
| cg19313402  | 1  | 220102307 | <i>SLC30A10</i>  | TSS1500          | S_Shore | 0.385±0.091 | 0.252±0.086 | 0.133 | 4.05E-03 | 1.68E-20 | -0.436 |
| cg14791413  | 12 | 129338870 | <i>GLT1D1</i>    | 5'UTR/1st intron | S_Shore | 0.28±0.105  | 0.148±0.05  | 0.133 | 8.75E-03 | 1.31E-15 | -0.380 |
| cg00767496  | 15 | 45671279  | <i>GATM</i>      | 5'UTR            | S_Shore | 0.327±0.099 | 0.195±0.162 | 0.133 | 1.84E-02 | 6.37E-06 | -0.220 |
| cg19747992  | 1  | 11713643  | <i>FBXO44</i>    | TSS1500          | N_Shore | 0.671±0.077 | 0.538±0.205 | 0.133 | 2.52E-02 | 5.32E-20 | -0.430 |
| cg14414415  | 6  | 3848634   | <i>FAM50B</i>    | TSS1500          | N_Shore | 0.621±0.112 | 0.488±0.134 | 0.132 | 1.85E-02 | 9.37E-07 | -0.239 |
| cg03605420  | 5  | 74162809  | <i>FAM169A</i>   | TSS1500          | S_Shore | 0.32±0.074  | 0.188±0.048 | 0.132 | 9.77E-04 | 1.35E-11 | -0.325 |
| cg08015496  | 1  | 160314061 | <i>COPA</i>      | TSS1500          | S_Shore | 0.415±0.126 | 0.283±0.144 | 0.132 | 3.21E-02 | 1.03E-06 | -0.238 |
| cg06204638  | 18 | 12656910  | <i>SPIRE1</i>    | TSS200           | N_Shore | 0.221±0.117 | 0.089±0.069 | 0.132 | 1.54E-02 | 2.44E-08 | -0.270 |
| cg03162994  | 18 | 23713729  | <i>PSMA8</i>     | TSS200           | Island  | 0.613±0.129 | 0.481±0.165 | 0.132 | 4.18E-02 | 2.70E-05 | -0.205 |
| cg10158679  | 6  | 30883074  | <i>VARS2</i>     | 5'UTR            | S_Shore | 0.626±0.088 | 0.494±0.127 | 0.132 | 6.56E-03 | 5.63E-06 | -0.222 |
| cg09826056  | 1  | 78511360  | <i>GIPC2</i>     | TSS1500          | N_Shore | 0.303±0.09  | 0.171±0.067 | 0.132 | 3.57E-03 | 5.13E-16 | -0.385 |
| cg19008097  | 5  | 140012986 | <i>CD14</i>      | 5'UTR/1st exon   | S_Shore | 0.232±0.075 | 0.1±0.049   | 0.132 | 1.13E-03 | 1.38E-09 | -0.293 |
| cg05660005  | 1  | 145507663 | <i>RBM8A</i>     | 5'UTR/1st exon   | Island  | 0.298±0.086 | 0.166±0.084 | 0.132 | 3.06E-03 | 3.02E-10 | -0.304 |
| cg15698299  | 3  | 52233019  | <i>ALAS1</i>     | 5'UTR            | S_Shore | 0.351±0.077 | 0.219±0.054 | 0.131 | 1.28E-03 | 2.64E-09 | -0.288 |
| cg03992976  | 22 | 36903496  | <i>FOXRED2</i>   | TSS1500          | S_Shore | 0.3±0.078   | 0.169±0.046 | 0.131 | 1.56E-03 | 1.21E-06 | -0.236 |
| cg25462903  | 11 | 47206835  | <i>PAC3IN3</i>   | 5'UTR/1st intron | N_Shore | 0.508±0.135 | 0.377±0.125 | 0.131 | 3.67E-02 | 3.52E-25 | -0.480 |
| cg23603036  | 1  | 12675777  | <i>DHRS3</i>     | 5'UTR/1st intron | N_Shore | 0.266±0.086 | 0.135±0.037 | 0.131 | 3.13E-03 | 2.06E-09 | -0.290 |
| cg17359753  | 19 | 40790165  | <i>AKT2</i>      | 5'UTR/1st intron | N_Shore | 0.31±0.071  | 0.18±0.061  | 0.130 | 7.43E-04 | 6.07E-06 | -0.221 |
| cg00208734  | 13 | 36788843  | <i>SOHLH2</i>    | TSS200           | Island  | 0.727±0.122 | 0.596±0.179 | 0.130 | 4.35E-02 | 4.08E-07 | -0.246 |
| cg15585294  | 11 | 22687641  | <i>GAS2</i>      | TSS1500          | N_Shore | 0.242±0.066 | 0.112±0.028 | 0.130 | 6.46E-04 | 3.18E-10 | -0.303 |
| cg14035045  | 3  | 50606289  | <i>C3orf18</i>   | 5'UTR/1st intron | S_Shore | 0.314±0.056 | 0.184±0.054 | 0.130 | 8.84E-05 | 1.09E-08 | -0.277 |
| cg14035045  | 3  | 50606289  | <i>HEMK1</i>     | TSS1500          | S_Shore | 0.314±0.056 | 0.184±0.054 | 0.130 | 8.84E-05 | 1.47E-07 | -0.255 |
| cg16958594  | 6  | 30882708  | <i>VARS2</i>     | 5'UTR/1st intron | S_Shore | 0.324±0.095 | 0.193±0.074 | 0.130 | 5.41E-03 | 4.32E-08 | -0.266 |
| cg18905161  | 6  | 84742998  | <i>MRAP2</i>     | TSS1500          | N_Shore | 0.289±0.079 | 0.158±0.046 | 0.130 | 1.72E-03 | 1.92E-05 | -0.209 |
| cg06055845  | 19 | 40788787  | <i>AKT2</i>      | 5'UTR/1st intron | N_Shore | 0.584±0.081 | 0.454±0.14  | 0.130 | 6.73E-03 | 4.21E-07 | -0.246 |
| cg22919728  | 3  | 126242490 | <i>CHST13</i>    | TSS1500          | N_Shore | 0.315±0.063 | 0.185±0.047 | 0.130 | 2.98E-04 | 2.61E-07 | -0.250 |
| cg25553916  | 5  | 177558755 | <i>RMND5B</i>    | 5'UTR            | S_Shore | 0.454±0.098 | 0.324±0.093 | 0.130 | 7.29E-03 | 2.06E-11 | -0.322 |
| cg07147033  | 1  | 1549615   | <i>MIB2</i>      | TSS1500          | N_Shore | 0.339±0.109 | 0.209±0.096 | 0.130 | 1.33E-02 | 2.93E-07 | -0.249 |
| cg14528319  | 19 | 14607713  | <i>GIPC1</i>     | TSS1500          | S_Shore | 0.608±0.109 | 0.478±0.187 | 0.130 | 3.74E-02 | 2.59E-05 | -0.206 |
| cg17749374  | 4  | 2797201   | <i>SH3BP2</i>    | 5'UTR/1st intron | S_Shelf | 0.685±0.081 | 0.555±0.149 | 0.130 | 8.86E-03 | 2.38E-08 | -0.271 |
| cg21167159  | 11 | 2018154   | <i>H19</i>       | 1st exon         | Island  | 0.749±0.065 | 0.619±0.183 | 0.130 | 1.42E-02 | 2.11E-05 | -0.208 |
| cg13127231  | 13 | 111806949 | <i>ARHGEF7</i>   | 5'UTR            | S_Shore | 0.279±0.134 | 0.15±0.09   | 0.130 | 3.14E-02 | 3.58E-05 | -0.202 |
| cg07343027  | 17 | 80024200  | <i>DUS1L</i>     | TSS1500          | S_Shore | 0.438±0.133 | 0.308±0.144 | 0.130 | 4.17E-02 | 2.85E-08 | -0.269 |
| cg18881641  | 6  | 170103498 | <i>WDR27</i>     | TSS1500          | S_Shore | 0.38±0.093  | 0.251±0.161 | 0.130 | 1.72E-02 | 4.75E-08 | -0.265 |
| cg00717678  | 17 | 1554577   | <i>RILP</i>      | TSS1500          | S_Shore | 0.632±0.091 | 0.502±0.124 | 0.130 | 7.82E-03 | 1.20E-06 | -0.237 |
| cg13663218  | 12 | 72666976  | <i>TRHDE</i>     | 1st exon         | Island  | 0.267±0.137 | 0.138±0.073 | 0.129 | 3.38E-02 | 3.67E-08 | -0.267 |
| cg08331960  | 16 | 2076597   | <i>SLC9A3R2</i>  | TSS1500          | N_Shore | 0.305±0.041 | 0.176±0.048 | 0.129 | 3.62E-06 | 1.15E-05 | -0.214 |
| cg12355677  | 6  | 168479787 | <i>FRMD1</i>     | 5'UTR/1st exon   | S_Shelf | 0.719±0.06  | 0.59±0.194  | 0.129 | 1.77E-02 | 3.84E-05 | -0.201 |
| cg23964386  | 9  | 114362249 | <i>PTGR1</i>     | TSS1500          | S_Shore | 0.26±0.07   | 0.131±0.035 | 0.129 | 8.92E-04 | 3.08E-06 | -0.228 |
| cg09447578  | 7  | 21582444  | <i>DNAH11</i>    | TSS1500          | Island  | 0.339±0.087 | 0.21±0.122  | 0.129 | 6.61E-03 | 2.26E-09 | -0.289 |
| cg01103827  | 21 | 40554221  | <i>PSMG1</i>     | 5'UTR/1st intron | N_Shore | 0.31±0.101  | 0.181±0.068 | 0.129 | 8.06E-03 | 7.76E-12 | -0.329 |
| cg06776976  | 1  | 212588580 | <i>TMEM206</i>   | TSS1500          | S_Shore | 0.27±0.129  | 0.141±0.101 | 0.128 | 3.00E-02 | 1.11E-05 | -0.215 |
| cg23396786  | 2  | 73299151  | <i>SFXN5</i>     | TSS1500          | Island  | 0.22±0.074  | 0.092±0.033 | 0.128 | 1.37E-03 | 1.15E-08 | -0.276 |
| cg17696194  | 11 | 58941051  | <i>DTX4</i>      | 5'UTR/1st intron | S_Shore | 0.295±0.095 | 0.167±0.073 | 0.128 | 6.21E-03 | 2.06E-10 | -0.307 |
| cg03484180  | 3  | 49967517  | <i>MON1A</i>     | TSS200           | S_Shore | 0.175±0.066 | 0.047±0.023 | 0.128 | 7.87E-04 | 2.90E-05 | -0.204 |
| cg12600843  | 6  | 30179881  | <i>TRIM26</i>    | 5'UTR/1st intron | N_Shore | 0.322±0.096 | 0.194±0.046 | 0.128 | 6.47E-03 | 2.15E-15 | -0.377 |
| cg04622125  | 21 | 46876658  | <i>COL18A1</i>   | 1st exon         | Island  | 0.553±0.084 | 0.425±0.052 | 0.128 | 2.91E-03 | 4.76E-10 | -0.301 |
| cg24659758  | 10 | 71891123  | <i>AIFM2</i>     | 5'UTR/1st intron | N_Shore | 0.552±0.112 | 0.424±0.163 | 0.128 | 3.16E-02 | 1.70E-36 | -0.568 |
| cg03551406  | 16 | 56715756  | <i>MT1X</i>      | TSS1500          | N_Shore | 0.49±0.068  | 0.363±0.091 | 0.128 | 9.09E-04 | 1.14E-05 | -0.214 |
| cg00451635  | 16 | 10675030  | <i>EMP2</i>      | TSS1500          | S_Shore | 0.369±0.082 | 0.241±0.075 | 0.128 | 2.61E-03 | 1.98E-08 | -0.272 |
| cg01475325  | 11 | 76498701  | <i>TSKU</i>      | 5'UTR/1st intron | S_Shelf | 0.5±0.085   | 0.372±0.165 | 0.128 | 1.59E-02 | 4.83E-35 | -0.558 |
| cg01293143  | 20 | 62688326  | <i>TCEA2</i>     | 5'UTR/1st exon   | N_Shore | 0.412±0.103 | 0.284±0.126 | 0.128 | 1.50E-02 | 2.30E-07 | -0.252 |
| cg27481594  | 15 | 43623282  | <i>ADAL</i>      | 5'UTR/1st intron | S_Shore | 0.258±0.105 | 0.13±0.051  | 0.128 | 1.07E-02 | 3.97E-13 | -0.347 |
| cg021081594 | 15 | 43623282  | <i>LCMT2</i>     | TSS1500          | S_Shore | 0.258±0.105 | 0.13±0.051  | 0.128 | 1.07E-02 | 2.92E-05 | -0.204 |
| cg01620164  | 2  | 164590272 | <i>FIGN</i>      | 5'UTR/1st intron | N_Shelf | 0.269±0.133 | 0.141±0.12  | 0.128 | 3.83E-02 | 1.71E-05 | -0.210 |
| cg20823695  | 1  | 2345410   | <i>PEX10</i>     | TSS1500          | S_Shore | 0.272±0.067 | 0.145±0.035 | 0.127 | 7.04E-04 | 2.97E-05 | -0.204 |
| cg12133118  | 17 | 19436770  | <i>SLC47A1</i>   | TSS1500          | N_Shore | 0.356±0.141 | 0.229±0.074 | 0.127 | 4.09E-02 | 1.10E-26 | -0.494 |
| cg01756799  | 17 | 40715281  | <i>COASY</i>     | 1st exon         | N_Shelf | 0.351±0.083 | 0.225±0.058 | 0.127 | 2.92E-03 | 1.23E-07 | -0.257 |
| cg00262344  | 18 | 23713741  | <i>PSMA8</i>     | TSS200           | Island  | 0.678±0.121 | 0.551±0.149 | 0.126 | 3.56E-02 | 4.81E-08 | -0.265 |
| cg16499834  | 12 | 131355834 | <i>RAN</i>       | TSS1500          | N_Shore | 0.408±0.108 | 0.282±0.11  | 0.126 | 1.66E-02 | 4.79E-06 | -0.223 |
| cg14091631  | 1  | 225117076 | <i>DNAH14</i>    | TSS1500          | N_Shore | 0.315±0.089 | 0.189±0.075 | 0.126 | 4.46E-03 | 5.99E-06 | -0.221 |
| cg03634777  | 6  | 160512657 | <i>LOC729603</i> | TSS1500          | S_Shore | 0.765±0.035 | 0.639±0.149 | 0.126 | 2.76E-03 | 4.51E-07 | -0.246 |
| cg13120726  | 4  | 164394822 | <i>TKTL2</i>     | 1st exon         | Island  | 0.78±0.079  | 0.654±0.156 | 0.126 | 1.18E-02 | 2.39E-06 | -0.230 |
| cg03077712  | 17 | 7138739   | <i>DVL2</i>      | TSS1500          | N_Shelf | 0.659±0.057 | 0.533±0.182 | 0.126 | 1.43E-02 | 2.96E-10 | -0.304 |
| cg16345272  | 6  | 30875382  | <i>GTF2H4</i>    | TSS1500          | N_Shore | 0.49±0.093  | 0.364±0.059 | 0.126 | 5.82E-03 | 1.32E-23 | -0.467 |
| cg05118916  | 1  | 55505063  | <i>PCSK9</i>     | TSS1500          | Island  | 0.246±0.079 | 0.12±0.041  | 0.126 | 2.34E-03 | 3.39E-05 | -0.203 |
| cg13357341  | 1  | 150849964 | <i>ARNT</i>      | TSS1500          | S_Shore | 0.404±0.098 | 0.278±0.127 | 0.126 | 1.39E-02 | 1.10E-11 | -0.326 |
| cg05370752  | 21 | 40756954  | <i>WRB</i>       | 5'UTR/1st intron | N_Shore | 0.666±0.089 | 0.54±0.105  | 0.126 | 6.36E-03 | 7.22E-11 | -0.314 |
| cg04140212  | 2  | 85829138  | <i>TMEM150A</i>  | 5'UTR            | N_Shore | 0.258±0.083 | 0.133±0.044 | 0.125 | 3.01E-03 | 6.81E-07 | -0.242 |
| cg24012708  | 9  | 116138128 | <i>HDHD3</i>     | 5'UTR/1st exon   | N_Shore | 0.535±0.067 | 0.409±0.037 | 0.125 | 8.00E-04 | 1.34E-18 | -0.415 |
| cg24121733  | 19 | 7953984   | <i>LRRRC8E</i>   | 5'UTR/1st intron | S_Shore | 0.629±0.068 | 0.503±0.153 | 0.125 | 8.06E-03 | 5.28E-10 | -0.300 |
| cg25821245  | 3  | 46608056  | <i>LRRC2</i>     | TSS200           | S_Shore | 0.216±0.07  | 0.091±0.032 | 0.125 | 1.16E-03 | 5.08E-08 | -0.264 |
| cg02433278  | 17 | 37856230  | <i>ERBB2</i>     | 1st exon         | N_Shore | 0.18±0.099  | 0.056±0.023 | 0.125 | 9.04E-03 | 1.49E-05 | -0.212 |
| cg01530032  | 17 | 19435805  | <i>SLC47A1</i>   | TSS1500          | N_Shore | 0.541±0.074 | 0.416±0.208 | 0.125 | 3.45E-02 | 7.23E-31 | -0.527 |
| cg23055772  | 7  | 94954438  | <i>PON1</i>      | TSS              |         |             |             |       |          |          |        |

|            |    |           |          |                  |         |             |             |       |          |          |        |
|------------|----|-----------|----------|------------------|---------|-------------|-------------|-------|----------|----------|--------|
| cg23333072 | 17 | 37856228  | ERBB2    | 5'UTR            | N_Shore | 0.205±0.091 | 0.081±0.041 | 0.125 | 5.55E-03 | 1.13E-06 | -0.237 |
| cg08878368 | 16 | 51183363  | SALL1    | 5'UTR/1st intron | N_Shore | 0.2±0.081   | 0.075±0.03  | 0.125 | 2.99E-03 | 1.13E-08 | -0.277 |
| cg06232807 | 16 | 51185132  | SALL1    | 1st exon         | Island  | 0.248±0.074 | 0.123±0.038 | 0.124 | 1.63E-03 | 2.35E-07 | -0.251 |
| cg00162862 | 16 | 15151269  | NTAN1    | TSS1500          | S_Shore | 0.723±0.095 | 0.599±0.156 | 0.124 | 2.06E-02 | 4.32E-16 | -0.386 |
| cg18176482 | 1  | 161128720 | USP21    | TSS1500          | N_Shore | 0.436±0.112 | 0.312±0.178 | 0.124 | 4.32E-02 | 7.24E-12 | -0.329 |
| cg04653308 | 9  | 131872018 | CRAT     | 5'UTR/1st intron | N_Shore | 0.334±0.071 | 0.21±0.036  | 0.124 | 1.26E-03 | 4.07E-07 | -0.246 |
| cg15198068 | 22 | 19843949  | GNB1L    | TSS1500          | S_Shore | 0.571±0.044 | 0.447±0.187 | 0.124 | 1.50E-02 | 2.89E-05 | -0.204 |
| cg17095929 | 11 | 64883911  | ZNHIT2   | 1st exon/3'UTR   | S_Shelf | 0.529±0.108 | 0.405±0.124 | 0.124 | 2.09E-02 | 1.00E-08 | -0.278 |
| cg12131302 | 9  | 140116093 | RNF208   | TSS1500          | S_Shore | 0.481±0.12  | 0.357±0.115 | 0.124 | 2.89E-02 | 5.11E-09 | -0.283 |
| cg20229788 | 2  | 27718498  | GCKR     | TSS1500          | S_Shore | 0.216±0.071 | 0.093±0.036 | 0.124 | 1.25E-03 | 5.30E-10 | -0.300 |
| cg20229788 | 2  | 27718498  | FNDC4    | TSS1500          | S_Shore | 0.216±0.071 | 0.093±0.036 | 0.124 | 1.25E-03 | 3.60E-07 | -0.248 |
| cg00425827 | 5  | 131346715 | ACSL6    | 5'UTR/1st intron | N_Shore | 0.674±0.084 | 0.551±0.212 | 0.123 | 4.44E-02 | 2.89E-20 | -0.433 |
| cg01560900 | 1  | 241804128 | OPN3     | TSS1500          | S_Shore | 0.435±0.124 | 0.312±0.156 | 0.123 | 4.57E-02 | 1.40E-07 | -0.256 |
| cg07056626 | 19 | 51845446  | VSI610L  | TSS200           | S_Shelf | 0.433±0.094 | 0.31±0.101  | 0.123 | 9.15E-03 | 5.29E-07 | -0.244 |
| cg01252455 | 5  | 175294907 | CPLX2    | 5'UTR            | N_Shelf | 0.404±0.082 | 0.28±0.059  | 0.123 | 3.18E-03 | 3.30E-05 | -0.203 |
| cg13714540 | 6  | 137366432 | IL20RA   | TSS1500          | S_Shore | 0.825±0.075 | 0.702±0.219 | 0.123 | 4.56E-02 | 3.83E-07 | -0.247 |
| cg20271029 | 1  | 46859845  | FAAH     | TSS200           | Island  | 0.203±0.073 | 0.081±0.036 | 0.122 | 1.62E-03 | 1.63E-07 | -0.255 |
| cg14465583 | 9  | 114362289 | PTGFR1   | TSS1500          | S_Shore | 0.207±0.082 | 0.085±0.047 | 0.122 | 3.45E-03 | 8.05E-07 | -0.240 |
| cg22378853 | 20 | 36148154  | BLCAP    | 5'UTR            | N_Shelf | 0.436±0.122 | 0.314±0.162 | 0.122 | 4.91E-02 | 1.27E-06 | -0.236 |
| cg11835347 | 1  | 113248232 | RHOC     | 5'UTR/1st intron | N_Shore | 0.264±0.116 | 0.142±0.073 | 0.122 | 2.20E-02 | 7.33E-12 | -0.329 |
| cg03214087 | 7  | 75624699  | TMEM120A | TSS1500          | S_Shore | 0.563±0.062 | 0.441±0.12  | 0.122 | 2.38E-03 | 1.81E-15 | -0.378 |
| cg02825171 | 6  | 168720183 | DACT2    | 1st exon         | Island  | 0.273±0.082 | 0.151±0.077 | 0.122 | 3.50E-03 | 5.75E-08 | -0.263 |
| cg00586317 | 12 | 122149765 | TMEM120B | TSS1500          | N_Shore | 0.201±0.084 | 0.079±0.034 | 0.122 | 4.04E-03 | 1.36E-05 | -0.212 |
| cg04794268 | 8  | 145690383 | CYHR1    | 5'UTR            | S_Shelf | 0.352±0.125 | 0.23±0.078  | 0.122 | 3.07E-02 | 8.28E-09 | -0.279 |
| cg04794268 | 8  | 145690383 | KIFC2    | TSS1500          | S_Shelf | 0.352±0.125 | 0.23±0.078  | 0.122 | 3.07E-02 | 2.62E-07 | -0.250 |
| cg21230493 | 8  | 26722496  | ADRA1A   | 1st exon         | Island  | 0.241±0.088 | 0.12±0.076  | 0.121 | 5.51E-03 | 3.86E-13 | -0.348 |
| cg10242476 | 3  | 46619364  | TGDF1    | 5'UTR/1st exon   | S_Shore | 0.754±0.077 | 0.633±0.079 | 0.121 | 2.48E-03 | 5.49E-07 | -0.244 |
| cg07998951 | 7  | 152456579 | ACTR3B   | TSS1500          | N_Shore | 0.289±0.075 | 0.168±0.11  | 0.121 | 3.98E-03 | 1.05E-07 | -0.258 |
| cg26767614 | 19 | 13136168  | NFIX     | 1st exon         | Island  | 0.86±0.03   | 0.739±0.201 | 0.121 | 2.20E-02 | 6.61E-24 | -0.469 |
| cg08314408 | 16 | 30457493  | SEPHS2   | TSS200           | S_Shore | 0.198±0.067 | 0.078±0.025 | 0.121 | 1.19E-03 | 3.84E-08 | -0.267 |
| cg1494100  | 6  | 18387313  | RNF144B  | TSS1500          | N_Shore | 0.416±0.083 | 0.295±0.1   | 0.121 | 5.38E-03 | 8.23E-09 | -0.279 |
| cg09772831 | 19 | 12175160  | ZNF844   | TSS1500          | N_Shore | 0.43±0.071  | 0.309±0.205 | 0.121 | 3.65E-02 | 8.51E-13 | -0.343 |
| cg26383537 | 19 | 41817029  | CCDC97   | 5'UTR/1st intron | S_Shore | 0.63±0.089  | 0.509±0.152 | 0.121 | 1.93E-02 | 1.11E-07 | -0.258 |
| cg23036171 | 1  | 54359138  | DIO1     | TSS1500          | S_Shelf | 0.763±0.073 | 0.642±0.148 | 0.120 | 1.05E-02 | 2.73E-31 | -0.531 |
| cg27065979 | 13 | 52734134  | NEK3     | TSS1500          | S_Shore | 0.782±0.06  | 0.661±0.181 | 0.120 | 1.92E-02 | 1.96E-11 | -0.323 |
| cg15796819 | 17 | 19651190  | ALDH3A1  | 5'UTR/1st intron | S_Shelf | 0.348±0.079 | 0.228±0.097 | 0.120 | 4.09E-03 | 5.31E-11 | -0.316 |
| cg09944616 | 17 | 80275880  | CD7      | TSS1500          | N_Shelf | 0.695±0.073 | 0.575±0.171 | 0.120 | 1.91E-02 | 1.08E-05 | -0.215 |
| cg01136471 | 16 | 16313867  | ABCC6    | 5'UTR            | N_Shelf | 0.735±0.058 | 0.615±0.101 | 0.120 | 9.09E-04 | 6.38E-09 | -0.281 |
| cg20774846 | 8  | 105479420 | DPYS     | TSS200           | S_Shore | 0.248±0.084 | 0.128±0.036 | 0.120 | 4.44E-03 | 2.23E-07 | -0.252 |
| cg17228942 | 11 | 7041930   | ZNF214   | TSS1500          | Island  | 0.204±0.112 | 0.084±0.029 | 0.120 | 1.89E-02 | 8.70E-10 | -0.296 |
| cg17228942 | 11 | 7041930   | NLRP14   | 5'UTR/1st exon   | Island  | 0.204±0.112 | 0.084±0.029 | 0.120 | 1.89E-02 | 4.11E-07 | -0.246 |
| cg08248285 | 14 | 35182889  | CFL2     | 5'UTR/1st exon   | N_Shore | 0.221±0.085 | 0.102±0.048 | 0.120 | 4.61E-03 | 1.45E-13 | -0.353 |
| cg06646021 | 1  | 229406520 | RAB4A    | TSS1500          | N_Shore | 0.331±0.067 | 0.212±0.06  | 0.120 | 9.37E-04 | 1.93E-12 | -0.338 |
| cg03964111 | 7  | 150498493 | TMEM176A | 5'UTR/1st intron | S_Shore | 0.27±0.072  | 0.15±0.04   | 0.120 | 1.66E-03 | 3.54E-22 | -0.452 |
| cg03964111 | 7  | 150498493 | TMEM176B | TSS1500          | S_Shore | 0.27±0.072  | 0.15±0.04   | 0.120 | 1.66E-03 | 1.58E-21 | -0.446 |
| cg06754987 | 1  | 44444250  | B4GALT2  | TSS1500          | N_Shore | 0.625±0.088 | 0.505±0.118 | 0.120 | 1.02E-02 | 8.47E-10 | -0.296 |
| cg00586623 | 16 | 11037122  | CLEC16A  | TSS1500          | S_Shore | 0.81±0.075  | 0.69±0.179  | 0.120 | 2.48E-02 | 1.06E-05 | -0.215 |
| cg02250594 | 18 | 55103353  | ONECUT2  | 1st exon         | Island  | 0.192±0.08  | 0.073±0.024 | 0.119 | 3.66E-03 | 3.98E-07 | -0.247 |
| cg03743982 | 16 | 75150833  | LDHD     | TSS200           | S_Shore | 0.239±0.072 | 0.12±0.034  | 0.119 | 1.81E-03 | 3.48E-13 | -0.348 |
| cg22523743 | 4  | 53115     | ZNF595   | TSS200           | N_Shore | 0.423±0.063 | 0.303±0.058 | 0.119 | 5.70E-04 | 5.13E-10 | -0.300 |
| cg04176995 | 6  | 30586468  | PPP1R10  | TSS1500          | S_Shore | 0.22±0.085  | 0.101±0.032 | 0.119 | 4.87E-03 | 7.34E-07 | -0.241 |
| cg00537979 | 21 | 46876731  | COL18A1  | 1st exon         | Island  | 0.634±0.087 | 0.515±0.059 | 0.119 | 5.50E-03 | 1.41E-06 | -0.235 |
| cg10919177 | 3  | 44519663  | ZNF445   | TSS1500          | S_Shore | 0.428±0.095 | 0.309±0.123 | 0.119 | 1.56E-02 | 2.15E-08 | -0.271 |
| cg11649376 | 12 | 81473234  | ACSS3    | 5'UTR/1st intron | S_Shore | 0.34±0.052  | 0.221±0.125 | 0.119 | 2.21E-03 | 9.46E-34 | -0.549 |
| cg11713493 | 17 | 17110295  | PLD6     | TSS1500          | S_Shore | 0.359±0.088 | 0.24±0.047  | 0.119 | 6.20E-03 | 8.96E-06 | -0.217 |
| cg14749417 | 12 | 6419509   | PLEKHG6  | TSS1500          | N_Shore | 0.437±0.055 | 0.319±0.059 | 0.118 | 1.99E-04 | 3.37E-05 | -0.203 |
| cg11553245 | 8  | 17355443  | SLC7A2   | 5'UTR/1st intron | S_Shore | 0.238±0.038 | 0.12±0.026  | 0.118 | 1.08E-05 | 4.19E-06 | -0.224 |
| cg06418113 | 18 | 43915901  | RNF165   | 5'UTR/1st intron | S_Shore | 0.414±0.082 | 0.296±0.2   | 0.118 | 4.35E-02 | 6.41E-16 | -0.384 |
| cg19386379 | 11 | 844284    | TSPAN4   | 5'UTR/1st intron | S_Shore | 0.25±0.076  | 0.132±0.092 | 0.118 | 3.51E-03 | 7.90E-09 | -0.279 |
| cg06346993 | 6  | 44093974  | MRPL14   | 5'UTR/1st exon   | N_Shore | 0.31±0.071  | 0.192±0.069 | 0.118 | 1.69E-03 | 1.82E-07 | -0.254 |
| cg06346993 | 6  | 44093974  | TMEM63B  | TSS1500          | N_Shore | 0.31±0.071  | 0.192±0.069 | 0.118 | 1.69E-03 | 1.12E-05 | -0.215 |
| cg08390696 | 13 | 99405102  | SLC15A1  | TSS200           | Island  | 0.332±0.076 | 0.215±0.051 | 0.118 | 2.45E-03 | 9.06E-07 | -0.239 |
| cg20253700 | 16 | 2099508   | TSC2     | 5'UTR            | S_Shore | 0.689±0.07  | 0.571±0.151 | 0.118 | 1.19E-02 | 7.80E-06 | -0.218 |
| cg05901765 | 5  | 68710818  | MARVELD2 | TSS200           | Island  | 0.221±0.07  | 0.104±0.043 | 0.117 | 1.50E-03 | 3.63E-05 | -0.202 |
| cg06314202 | 16 | 1128070   | SSTR5    | 5'UTR/1st intron | N_Shore | 0.613±0.067 | 0.495±0.138 | 0.117 | 7.50E-03 | 6.20E-08 | -0.263 |
| cg04552852 | 11 | 844390    | TSPAN4   | 5'UTR/1st intron | S_Shore | 0.336±0.1   | 0.219±0.129 | 0.117 | 2.22E-02 | 9.79E-15 | -0.369 |
| cg25715816 | 2  | 70529513  | FAM136A  | TSS1500          | S_Shore | 0.61±0.088  | 0.492±0.166 | 0.117 | 2.83E-02 | 3.66E-07 | -0.247 |
| cg06707765 | 8  | 11604273  | GATA4    | 5'UTR            | N_Shelf | 0.563±0.097 | 0.446±0.108 | 0.117 | 1.50E-02 | 1.33E-05 | -0.213 |
| cg16175725 | 12 | 121416796 | HNF1A    | 1st exon         | Island  | 0.542±0.093 | 0.425±0.056 | 0.117 | 8.77E-03 | 4.14E-25 | -0.480 |
| cg14576824 | 1  | 213224402 | RPS6KC1  | TSS200           | N_Shore | 0.229±0.124 | 0.112±0.092 | 0.117 | 3.60E-02 | 4.91E-07 | -0.245 |
| cg04410756 | 1  | 78956268  | PTGFR    | TSS1500          | N_Shore | 0.365±0.075 | 0.248±0.124 | 0.117 | 7.49E-03 | 5.04E-06 | -0.223 |
| cg02275418 | 3  | 15372726  | SH3BP5   | 5'UTR/1st intron | N_Shore | 0.524±0.11  | 0.407±0.121 | 0.117 | 2.83E-02 | 2.47E-09 | -0.288 |
| cg04207166 | 3  | 10546830  | ATP2B2   | 5'UTR            | N_Shore | 0.296±0.063 | 0.179±0.046 | 0.117 | 7.26E-04 | 3.97E-12 | -0.333 |
| cg22014398 | 5  | 179230866 | MGAT4B   | TSS1500          | N_Shore | 0.314±0.088 | 0.197±0.051 | 0.117 | 6.37E-03 | 5.93E-24 | -0.469 |
| cg23731030 | 17 | 37856217  | ERBB2    | 5'UTR            | N_Shore | 0.177±0.087 | 0.06±0.029  | 0.117 | 6.58E-03 | 6.11E-07 | -0.243 |
| cg02219360 | 11 | 2721409   | KCNQ1OT1 | TSS200           | Island  | 0.459±0.037 | 0.342±0.128 | 0.117 | 1.79E-03 | 8.63E-08 | -0.260 |
| cg16454130 | 7  | 73245439  | CLDN4    | 5'UTR/1st exon   | Island  | 0.431±0.082 | 0.314±0.092 | 0.117 | 5.81E-03 | 1.23E-13 | -0.354 |
| cg12582959 | 19 | 56159199  | CCDC106  | 5'UTR/1st exon   | S_Shelf | 0.401±0.129 | 0.285±0.09  | 0.117 | 4.28E-02 | 2.69E-24 | -0.472 |
| cg17971649 | 20 | 36153225  | BLCAP    | 5'UTR/1st intron | S_Shore | 0.745±0.027 | 0.629±0.186 | 0.117 | 1.80E-02 | 1.14E-10 | -0.311 |
| cg26860257 | 19 | 42755793  | ERF      | 5'UTR/1st intron | N_Shore | 0.682±0.059 | 0.566±0.127 | 0.116 | 4.11E-03 | 3.62E-05 | -0.202 |
| cg26034769 | 18 | 55714670  | NEDD4L   | 5'UTR/1st exon   | S_Shelf | 0.482±0.116 | 0.366±0.131 | 0.116 | 3.87E-02 | 2.29E-11 | -0.322 |
| cg26477576 | 10 | 89419292  | PAPSS2   | TSS200           | N_Shore | 0.267±0.105 | 0.151±0.094 | 0.116 | 1.99E-02 | 7.00E-14 | -0.358 |
| cg06191390 | 2  | 73299285  | SFXN5    | TSS1500          | S_Shore | 0.207±0.071 | 0.092±0.034 | 0.116 | 2.05E-03 | 7.91E-13 | -0.343 |
| cg16488174 | 1  | 16971585  | MS1P2    | TSS1500          | N_Shore | 0.369±0.069 | 0.253±0.046 | 0.116 | 1.45E-03 | 6.28E-06 | -0.220 |
| cg09305680 | 8  | 117778069 | UTP23    | TSS1500          | N_Shore | 0.27±0.104  | 0.155±0.096 | 0.116 | 1.97E-02 | 9.49E-11 | -0.312 |
| cg22883889 | 20 | 61583686  | SLC17A9  | TSS1500          | N_Shore | 0.277±0.079 | 0.162±0.05  | 0.116 | 3.60E-03 | 8.70E-10 | -0.296 |
| cg07224067 | 17 | 48555565  | RSAD1    | TSS1500          | N_Shore | 0.545±0.077 | 0.43±0.11   | 0.115 | 6.23E-03 | 9.63E-08 |        |

|            |    |           |            |                  |         |             |             |       |          |          |        |
|------------|----|-----------|------------|------------------|---------|-------------|-------------|-------|----------|----------|--------|
| cg18278486 | 6  | 26987575  | OC10027074 | 1st exon         | N_Shore | 0.255±0.086 | 0.139±0.038 | 0.115 | 6.16E-03 | 1.40E-11 | -0.325 |
| cg14391622 | 3  | 124931956 | SLC12A8    | TSS1500          | S_Shore | 0.315±0.094 | 0.2±0.1     | 0.115 | 1.32E-02 | 3.23E-09 | -0.286 |
| cg05337019 | 1  | 16062361  | SLC25A34   | TSS1500          | S_Shelf | 0.366±0.081 | 0.251±0.09  | 0.115 | 5.54E-03 | 3.02E-13 | -0.349 |
| cg06230674 | 18 | 20716991  | CABLES1    | 5'UTR/1st intron | Island  | 0.315±0.059 | 0.2±0.083   | 0.115 | 7.31E-04 | 6.26E-17 | -0.396 |
| cg22975712 | 22 | 38218945  | GALR3      | TSS1500          | N_Shore | 0.674±0.079 | 0.559±0.18  | 0.115 | 3.33E-02 | 5.71E-06 | -0.221 |
| cg26277102 | 3  | 75834282  | ZNF717     | 5'UTR/1st intron | Island  | 0.365±0.076 | 0.25±0.083  | 0.115 | 3.63E-03 | 2.73E-09 | -0.288 |
| cg24952744 | 3  | 10547584  | ATP2B2     | 5'UTR            | S_Shore | 0.28±0.071  | 0.166±0.062 | 0.115 | 1.93E-03 | 6.33E-14 | -0.358 |
| cg25970491 | 22 | 19279922  | CLTCL1     | TSS1500          | S_Shore | 0.291±0.08  | 0.177±0.042 | 0.115 | 4.24E-03 | 3.45E-05 | -0.203 |
| cg16301036 | 12 | 118808298 | TAOK3      | 5'UTR/1st intron | N_Shore | 0.703±0.047 | 0.588±0.18  | 0.115 | 2.01E-02 | 2.28E-09 | -0.289 |
| cg25213362 | 12 | 51236634  | TMPPRS512  | TSS200           | Island  | 0.656±0.097 | 0.542±0.124 | 0.115 | 2.11E-02 | 2.68E-06 | -0.229 |
| cg11851129 | 12 | 57624530  | SHMT2      | 5'UTR/1st intron | S_Shore | 0.349±0.074 | 0.234±0.05  | 0.114 | 2.54E-03 | 2.77E-06 | -0.229 |
| cg10372473 | 19 | 10735594  | SLC44A2    | TSS1500          | N_Shore | 0.467±0.057 | 0.352±0.138 | 0.114 | 6.49E-03 | 4.88E-06 | -0.223 |
| cg27549208 | 7  | 43965451  | UBE2D4     | TSS1500          | N_Shore | 0.249±0.075 | 0.135±0.043 | 0.114 | 2.79E-03 | 4.30E-06 | -0.224 |
| cg08687251 | 14 | 74003780  | HEATR4     | 5'UTR/1st intron | N_Shore | 0.369±0.071 | 0.254±0.042 | 0.114 | 1.99E-03 | 4.44E-16 | -0.386 |
| cg08687251 | 14 | 74003780  | ACOT1      | TSS200           | N_Shore | 0.369±0.071 | 0.254±0.042 | 0.114 | 1.99E-03 | 1.70E-13 | -0.352 |
| cg20165416 | 10 | 89264080  | MINPP1     | TSS200           | N_Shore | 0.182±0.067 | 0.068±0.025 | 0.114 | 1.70E-03 | 2.46E-07 | -0.251 |
| cg02711479 | 1  | 36849024  | STK40      | 5'UTR/1st intron | N_Shelf | 0.871±0.038 | 0.757±0.179 | 0.114 | 1.77E-02 | 7.25E-15 | -0.371 |
| cg16642695 | 8  | 67343633  | ADHFE1     | TSS1500          | N_Shore | 0.321±0.119 | 0.207±0.058 | 0.114 | 3.12E-02 | 3.18E-13 | -0.349 |
| cg02998861 | 19 | 1491701   | PCS5K4     | TSS1500          | Island  | 0.271±0.078 | 0.157±0.043 | 0.114 | 3.65E-03 | 2.61E-07 | -0.250 |
| cg10974128 | 10 | 93393509  | PPP1R3C    | TSS1500          | S_Shore | 0.284±0.073 | 0.17±0.072  | 0.114 | 2.67E-03 | 1.18E-05 | -0.214 |
| cg18607308 | 16 | 66969500  | CES2       | 5'UTR/1st exon   | Island  | 0.337±0.057 | 0.223±0.066 | 0.113 | 4.23E-04 | 2.67E-16 | -0.389 |
| cg24107665 | 8  | 144372932 | ZNF696     | TSS1500          | S_Shore | 0.183±0.087 | 0.069±0.03  | 0.113 | 7.36E-03 | 1.18E-08 | -0.276 |
| cg02712878 | 3  | 138327370 | FAIM       | TSS1500          | N_Shore | 0.35±0.1    | 0.236±0.057 | 0.113 | 1.49E-02 | 1.46E-05 | -0.212 |
| cg20277416 | 11 | 64879061  | TM7SF2     | TSS1500          | Island  | 0.644±0.097 | 0.53±0.133  | 0.113 | 2.49E-02 | 2.13E-10 | -0.306 |
| cg18608017 | 10 | 73158072  | CDH23      | 5'UTR/1st intron | S_Shore | 0.268±0.058 | 0.155±0.038 | 0.113 | 5.15E-04 | 2.21E-06 | -0.231 |
| cg05453016 | 16 | 15073109  | PDXDC1     | 5'UTR/1st intron | S_Shelf | 0.391±0.075 | 0.278±0.067 | 0.113 | 3.27E-03 | 1.08E-10 | -0.311 |
| cg01925521 | 4  | 166299123 | CPE        | TSS1500          | N_Shore | 0.752±0.069 | 0.639±0.205 | 0.113 | 4.80E-02 | 1.54E-05 | -0.211 |
| cg27295373 | 1  | 220102277 | SLC30A10   | TSS1500          | S_Shore | 0.363±0.105 | 0.25±0.088  | 0.113 | 2.13E-02 | 2.62E-18 | -0.412 |
| cg01194538 | 22 | 43043270  | CYB5R3     | TSS1500          | N_Shore | 0.414±0.111 | 0.301±0.13  | 0.113 | 3.76E-02 | 9.38E-08 | -0.259 |
| cg24996280 | 8  | 143481281 | TSNARE1    | 5'UTR/1st intron | N_Shelf | 0.542±0.079 | 0.429±0.18  | 0.113 | 3.56E-02 | 4.12E-20 | -0.431 |
| cg14326805 | 9  | 71737756  | TJP2       | 5'UTR/1st intron | S_Shore | 0.226±0.077 | 0.113±0.04  | 0.113 | 3.70E-03 | 6.33E-07 | -0.242 |
| cg12013321 | 6  | 53410182  | GCLC       | TSS1500          | S_Shore | 0.193±0.079 | 0.081±0.03  | 0.113 | 4.64E-03 | 2.16E-06 | -0.231 |
| cg09284708 | 6  | 39901897  | MOCS1      | 5'UTR/1st exon   | Island  | 0.187±0.091 | 0.074±0.04  | 0.113 | 9.36E-03 | 7.10E-10 | -0.298 |
| cg01322405 | 21 | 40757317  | WRB        | 5'UTR/1st intron | N_Shore | 0.698±0.082 | 0.586±0.091 | 0.113 | 7.29E-03 | 6.87E-14 | -0.358 |
| cg05399330 | 1  | 55464530  | BSND       | TSS200           | S_Shore | 0.365±0.111 | 0.253±0.086 | 0.112 | 2.77E-02 | 5.64E-06 | -0.222 |
| cg10883038 | 1  | 115211984 | DENND2C    | 5'UTR/1st intron | N_Shore | 0.212±0.078 | 0.099±0.037 | 0.112 | 4.25E-03 | 4.73E-08 | -0.265 |
| cg01156834 | 17 | 36763024  | SCRN1      | TSS1500          | Island  | 0.235±0.074 | 0.122±0.052 | 0.112 | 2.77E-03 | 4.09E-10 | -0.302 |
| cg19491035 | 12 | 12502846  | MANSC1     | 5'UTR/1st intron | N_Shore | 0.27±0.109  | 0.158±0.127 | 0.112 | 3.54E-02 | 3.27E-09 | -0.286 |
| cg25008263 | 14 | 89884608  | FOXN3      | 5'UTR/1st intron | S_Shore | 0.255±0.077 | 0.143±0.051 | 0.112 | 3.82E-03 | 8.31E-10 | -0.297 |
| cg17303833 | 10 | 97889448  | ZNF518A    | TSS1500          | N_Shore | 0.345±0.086 | 0.233±0.145 | 0.112 | 2.22E-02 | 1.99E-07 | -0.253 |
| cg26220336 | 20 | 37554591  | FAM83D     | TSS1500          | N_Shore | 0.374±0.077 | 0.261±0.095 | 0.112 | 5.63E-03 | 1.64E-06 | -0.234 |
| cg16575104 | 5  | 10308246  | CMBL       | TSS200           | S_Shore | 0.197±0.098 | 0.084±0.032 | 0.112 | 1.42E-02 | 5.17E-28 | -0.505 |
| cg05483406 | 8  | 146013229 | ZNF34      | TSS1500          | N_Shelf | 0.377±0.087 | 0.265±0.117 | 0.112 | 1.43E-02 | 2.68E-13 | -0.350 |
| cg10061906 | 8  | 146013430 | ZNF34      | TSS1500          | N_Shelf | 0.472±0.063 | 0.36±0.176  | 0.112 | 2.59E-02 | 4.07E-06 | -0.225 |
| cg20234205 | 11 | 64492155  | NRXN2      | TSS1500          | S_Shore | 0.846±0.028 | 0.734±0.19  | 0.112 | 2.49E-02 | 7.16E-09 | -0.280 |
| cg02853107 | 4  | 41984968  | DCAF4L1    | 1st exon         | S_Shore | 0.855±0.069 | 0.743±0.077 | 0.112 | 2.14E-03 | 7.86E-10 | -0.297 |
| cg22979368 | 2  | 217501581 | IGFBP2     | 5'UTR/1st intron | S_Shelf | 0.343±0.057 | 0.231±0.074 | 0.112 | 5.41E-04 | 1.75E-09 | -0.291 |
| cg03163767 | 16 | 66969506  | CES2       | 5'UTR/1st exon   | Island  | 0.386±0.059 | 0.274±0.078 | 0.112 | 7.91E-04 | 3.04E-14 | -0.363 |
| cg27119919 | 11 | 60684332  | TMEM109    | 5'UTR/1st intron | S_Shelf | 0.641±0.054 | 0.529±0.145 | 0.112 | 8.79E-03 | 2.61E-09 | -0.288 |
| cg13078931 | 1  | 53397458  | SCP2       | 5'UTR/1st intron | S_Shelf | 0.797±0.061 | 0.685±0.158 | 0.112 | 1.59E-02 | 3.34E-09 | -0.286 |
| cg13072940 | 3  | 49967521  | MON1A      | TSS200           | S_Shore | 0.21±0.055  | 0.099±0.025 | 0.112 | 4.93E-04 | 2.25E-06 | -0.231 |
| cg02409177 | 8  | 26721870  | ADRA1A     | 1st exon         | Island  | 0.294±0.107 | 0.182±0.081 | 0.112 | 2.35E-02 | 3.56E-16 | -0.387 |
| cg20396069 | 17 | 46908122  | CALCOCO2   | TSS1500          | N_Shore | 0.518±0.102 | 0.406±0.144 | 0.112 | 3.62E-02 | 7.13E-09 | -0.280 |
| cg06565604 | 17 | 78964771  | CHMP6      | TSS1500          | N_Shore | 0.43±0.095  | 0.318±0.091 | 0.111 | 1.54E-02 | 4.66E-06 | -0.223 |
| cg16910047 | 4  | 39368611  | RFC1       | TSS1500          | S_Shore | 0.614±0.052 | 0.503±0.048 | 0.111 | 2.20E-04 | 2.68E-14 | -0.363 |
| cg11329129 | 11 | 705692    | EPS8L2     | TSS1500          | N_Shore | 0.382±0.088 | 0.271±0.048 | 0.111 | 8.38E-03 | 2.70E-07 | -0.250 |
| cg06197377 | 1  | 55505061  | PCSK9      | TSS1500          | Island  | 0.22±0.078  | 0.109±0.039 | 0.111 | 4.53E-03 | 5.34E-06 | -0.222 |
| cg05278955 | 5  | 76381538  | ZBED3      | 5'UTR/1st intron | N_Shore | 0.77±0.081  | 0.659±0.167 | 0.111 | 3.17E-02 | 2.32E-16 | -0.389 |
| cg02420927 | 3  | 12703582  | RAF1       | 5'UTR/1st intron | N_Shore | 0.315±0.05  | 0.204±0.084 | 0.111 | 4.04E-04 | 4.94E-07 | -0.245 |
| cg19631779 | 15 | 63339148  | TPM1       | TSS1500          | N_Shore | 0.766±0.054 | 0.655±0.126 | 0.111 | 4.56E-03 | 2.65E-16 | -0.389 |
| cg24315973 | 4  | 106631934 | GSTCD      | 5'UTR/1st intron | S_Shore | 0.812±0.029 | 0.702±0.186 | 0.110 | 2.45E-02 | 7.48E-11 | -0.314 |
| cg10760299 | 15 | 45669010  | GATM       | 5'UTR            | N_Shore | 0.254±0.103 | 0.144±0.143 | 0.110 | 3.89E-02 | 7.55E-15 | -0.370 |
| cg13947469 | 7  | 63505871  | ZNF727     | 5'UTR/1st exon   | N_Shore | 0.23±0.086  | 0.12±0.064  | 0.110 | 7.99E-03 | 1.80E-05 | -0.210 |
| cg22499139 | 6  | 29759718  | HCG4       | 1st exon         | N_Shore | 0.592±0.104 | 0.482±0.132 | 0.110 | 3.59E-02 | 1.66E-11 | -0.324 |
| cg27618939 | 8  | 71581788  | XKR9       | 5'UTR/1st intron | S_Shore | 0.292±0.09  | 0.182±0.058 | 0.110 | 1.01E-02 | 5.28E-16 | -0.385 |
| cg27618939 | 8  | 71581788  | LACTB2     | TSS1500          | S_Shore | 0.292±0.09  | 0.182±0.058 | 0.110 | 1.01E-02 | 1.44E-05 | -0.212 |
| cg07189401 | 11 | 19736333  | OC10012678 | TSS200           | S_Shore | 0.232±0.1   | 0.122±0.101 | 0.109 | 2.27E-02 | 4.89E-09 | -0.283 |
| cg18535283 | 22 | 43044071  | CYB5R3     | TSS1500          | N_Shore | 0.612±0.094 | 0.503±0.123 | 0.109 | 2.41E-02 | 1.02E-05 | -0.215 |
| cg16562724 | 16 | 68270631  | ESRP2      | TSS1500          | Island  | 0.281±0.075 | 0.172±0.024 | 0.109 | 4.26E-03 | 2.73E-05 | -0.205 |
| cg09706243 | 11 | 67121634  | POLD4      | TSS1500          | S_Shore | 0.215±0.031 | 0.106±0.034 | 0.109 | 1.00E-06 | 1.40E-05 | -0.212 |
| cg14268714 | 9  | 5186162   | INSL6      | TSS1500          | S_Shore | 0.781±0.066 | 0.672±0.141 | 0.109 | 1.30E-02 | 2.31E-16 | -0.389 |
| cg19766489 | 1  | 78511344  | GIPC2      | TSS1500          | N_Shore | 0.303±0.102 | 0.194±0.101 | 0.109 | 2.49E-02 | 5.03E-24 | -0.470 |
| cg13460740 | 22 | 21369777  | P2RX6      | 5'UTR/1st intron | S_Shore | 0.718±0.07  | 0.61±0.164  | 0.109 | 2.63E-02 | 4.66E-07 | -0.245 |
| cg10580335 | 3  | 125803859 | SLC41A3    | 5'UTR/1st intron | S_Shore | 0.843±0.047 | 0.734±0.182 | 0.108 | 2.76E-02 | 1.63E-09 | -0.292 |
| cg19362196 | 1  | 26233615  | STMN1      | TSS1500          | Island  | 0.444±0.109 | 0.335±0.144 | 0.108 | 4.98E-02 | 1.91E-05 | -0.209 |
| cg04439776 | 10 | 71907412  | TVSND1     | TSS1500          | S_Shore | 0.499±0.062 | 0.391±0.155 | 0.108 | 1.78E-02 | 5.00E-12 | -0.332 |
| cg25569514 | 22 | 46549404  | PPARA      | 5'UTR            | S_Shore | 0.872±0.015 | 0.763±0.177 | 0.108 | 1.92E-02 | 7.86E-08 | -0.261 |
| cg24854914 | 7  | 89784790  | STEAP1     | 5'UTR/1st intron | S_Shore | 0.699±0.108 | 0.591±0.142 | 0.108 | 4.70E-02 | 1.60E-34 | -0.554 |
| cg04037228 | 3  | 45636386  | LIMD1      | 1st exon         | S_Shore | 0.304±0.078 | 0.196±0.04  | 0.108 | 5.31E-03 | 5.37E-11 | -0.316 |
| cg12074985 | 10 | 99080756  | FRAT1      | 1st exon/3'UTR   | Island  | 0.219±0.062 | 0.111±0.025 | 0.108 | 1.43E-03 | 4.21E-06 | -0.224 |
| cg20728156 | 2  | 217499344 | IGFBP2     | 5'UTR/1st intron | S_Shore | 0.25±0.08   | 0.142±0.047 | 0.108 | 5.75E-03 | 1.19E-09 | -0.294 |
| cg10376731 | 10 | 103113307 | BTRC       | TSS1500          | N_Shore | 0.799±0.061 | 0.691±0.167 | 0.108 | 2.40E-02 | 1.41E-05 | -0.212 |
| cg02835421 | 1  | 44411569  | IPO13      | TSS1500          | N_Shore | 0.251±0.1   | 0.143±0.047 | 0.108 | 1.88E-02 | 6.71E-10 | -0.298 |
| cg01444643 | 1  | 55504848  | PCSK9      | TSS1500          | N_Shore | 0.537±0.034 | 0.429±0.139 | 0.108 | 5.43E-03 | 1.39E-29 | -0.517 |
| cg04548483 | 8  | 145597148 | ADCK5      | TSS1500          | N_Shore | 0.221±0.094 | 0.113±0.048 | 0.108 | 1.38E-02 | 7.56E-08 | -0.261 |
| cg06649737 | 1  | 161068715 | KLHDC9     | 1st exon         | Island  | 0.245±0.074 | 0.137±0.07  | 0.108 | 4.24E-03 | 1.59E-15 | -0.379 |
| cg19695041 | 8  | 38615330  | TACC1      | 5'UTR/1st intron | S_Shore | 0.328±0.072 | 0.221±      |       |          |          |        |

|            |    |           |           |                  |         |             |             |       |          |          |        |
|------------|----|-----------|-----------|------------------|---------|-------------|-------------|-------|----------|----------|--------|
| cg01802294 | 4  | 17516550  | CLRN2     | TSS1500          | S_Shelf | 0.747±0.069 | 0.64±0.162  | 0.107 | 2.63E-02 | 1.85E-13 | -0.352 |
| cg18168672 | 20 | 61905223  | ARFGAP1   | 5'UTR/1st intron | S_Shore | 0.315±0.064 | 0.208±0.051 | 0.107 | 1.57E-03 | 4.34E-07 | -0.246 |
| cg26052586 | 18 | 20717411  | CABLES1   | 5'UTR/1st intron | S_Shore | 0.459±0.083 | 0.352±0.18  | 0.107 | 4.92E-02 | 3.22E-32 | -0.537 |
| cg14487271 | 8  | 87354422  | WWP1      | TSS1500          | N_Shore | 0.237±0.079 | 0.13±0.041  | 0.107 | 5.85E-03 | 2.40E-05 | -0.206 |
| cg13340636 | 3  | 147110667 | ZIC4      | TSS1500          | Island  | 0.228±0.101 | 0.121±0.084 | 0.107 | 2.30E-02 | 6.03E-09 | -0.282 |
| cg05726600 | 7  | 150498594 | TMEM176A  | 5'UTR/1st intron | S_Shore | 0.192±0.058 | 0.086±0.031 | 0.107 | 9.06E-04 | 4.95E-15 | -0.373 |
| cg05726600 | 7  | 150498594 | TMEM176B  | TSS1500          | S_Shore | 0.192±0.058 | 0.086±0.031 | 0.107 | 9.06E-04 | 3.57E-14 | -0.362 |
| cg14220634 | 9  | 97020667  | ZNF169    | TSS1500          | N_Shore | 0.508±0.105 | 0.402±0.141 | 0.107 | 4.66E-02 | 1.29E-05 | -0.213 |
| cg07176589 | 8  | 77596382  | ZFHX4     | 5'UTR/1st intron | S_Shore | 0.252±0.088 | 0.146±0.094 | 0.107 | 1.40E-02 | 2.00E-19 | -0.424 |
| cg06418871 | 5  | 68710831  | MARVELD2  | TSS200           | Island  | 0.199±0.078 | 0.092±0.049 | 0.106 | 5.80E-03 | 1.68E-05 | -0.210 |
| cg13555772 | 11 | 705748    | EPS8L2    | TSS1500          | N_Shore | 0.311±0.059 | 0.205±0.048 | 0.106 | 9.35E-04 | 2.71E-07 | -0.250 |
| cg15006681 | 22 | 38199759  | H1FO      | TSS1500          | N_Shore | 0.482±0.083 | 0.376±0.131 | 0.106 | 2.17E-02 | 6.68E-20 | -0.429 |
| cg24338748 | 17 | 34947916  | DHRS11    | TSS1500          | N_Shore | 0.199±0.076 | 0.093±0.04  | 0.106 | 4.87E-03 | 5.96E-07 | -0.243 |
| cg20785560 | 1  | 78511235  | GIPC2     | TSS1500          | N_Shore | 0.264±0.1   | 0.158±0.135 | 0.106 | 3.85E-02 | 1.43E-23 | -0.466 |
| cg00751332 | 18 | 20714332  | CABLES1   | TSS1500          | N_Shore | 0.279±0.092 | 0.174±0.054 | 0.106 | 1.38E-02 | 2.59E-05 | -0.206 |
| cg05093315 | 11 | 18127958  | SAAL1     | TSS1500          | S_Shore | 0.448±0.09  | 0.343±0.087 | 0.106 | 1.50E-02 | 3.98E-12 | -0.333 |
| cg00103329 | 1  | 204121923 | ETNK2     | TSS1500          | S_Shore | 0.71±0.061  | 0.604±0.137 | 0.105 | 1.18E-02 | 1.62E-23 | -0.465 |
| cg17935233 | 1  | 156338826 | RHBG      | TSS200           | Island  | 0.273±0.052 | 0.168±0.046 | 0.105 | 3.32E-04 | 2.76E-07 | -0.250 |
| cg20687553 | 17 | 79876287  | SIRT7     | TSS1500          | S_Shore | 0.504±0.057 | 0.399±0.107 | 0.105 | 3.49E-03 | 6.38E-18 | -0.408 |
| cg03514351 | 1  | 65991765  | LEPR      | 5'UTR            | Island  | 0.178±0.09  | 0.073±0.033 | 0.105 | 1.24E-02 | 1.30E-06 | -0.236 |
| cg07644368 | 5  | 115152785 | CDO1      | TSS1500          | S_Shore | 0.188±0.074 | 0.083±0.031 | 0.105 | 4.61E-03 | 1.95E-22 | -0.455 |
| cg19607845 | 6  | 52934457  | FBXO9     | 5'UTR/1st intron | S_Shelf | 0.459±0.088 | 0.354±0.133 | 0.105 | 2.73E-02 | 2.86E-06 | -0.228 |
| cg07850418 | 3  | 147110378 | ZIC4      | TSS200           | Island  | 0.236±0.093 | 0.131±0.094 | 0.105 | 1.91E-02 | 1.07E-07 | -0.258 |
| cg18727948 | 4  | 53233     | ZNF595    | 5'UTR/1st exon   | Island  | 0.626±0.054 | 0.521±0.133 | 0.105 | 8.71E-03 | 1.30E-45 | -0.623 |
| cg14338345 | 9  | 22447679  | DMRTA1    | 1st exon         | Island  | 0.251±0.092 | 0.147±0.044 | 0.105 | 1.47E-02 | 2.35E-11 | -0.321 |
| cg02097479 | 17 | 34891843  | MYO19     | TSS1500          | S_Shore | 0.301±0.079 | 0.196±0.145 | 0.105 | 2.64E-02 | 9.39E-08 | -0.259 |
| cg25492569 | 3  | 46608025  | LRRC2     | 5'UTR/1st exon   | S_Shore | 0.211±0.056 | 0.106±0.036 | 0.104 | 7.40E-04 | 1.89E-05 | -0.209 |
| cg02900253 | 1  | 6673709   | PHF13     | TSS200           | Island  | 0.324±0.074 | 0.22±0.079  | 0.104 | 5.66E-03 | 2.19E-05 | -0.207 |
| cg10124440 | 12 | 6960295   | CDCA3     | 5'UTR/1st intron | N_Shore | 0.386±0.064 | 0.282±0.08  | 0.104 | 2.59E-03 | 8.53E-14 | -0.357 |
| cg01419539 | 4  | 53010     | ZNF595    | TSS200           | N_Shore | 0.415±0.037 | 0.311±0.063 | 0.104 | 3.06E-05 | 1.08E-26 | -0.494 |
| cg19248564 | 22 | 43042879  | CYB5R3    | 5'UTR/1st exon   | N_Shelf | 0.372±0.083 | 0.268±0.11  | 0.104 | 1.64E-02 | 6.55E-07 | -0.242 |
| cg12100463 | 14 | 105259826 | AKT1      | 5'UTR/1st exon   | N_Shore | 0.782±0.067 | 0.678±0.134 | 0.104 | 1.47E-02 | 4.64E-10 | -0.301 |
| cg16759783 | 18 | 77746937  | TXNL4A    | 5'UTR            | N_Shore | 0.347±0.096 | 0.243±0.091 | 0.104 | 2.28E-02 | 1.01E-08 | -0.278 |
| cg00423487 | 19 | 4455957   | UBXN6     | TSS1500          | N_Shore | 0.417±0.078 | 0.313±0.082 | 0.104 | 7.90E-03 | 1.36E-06 | -0.235 |
| cg01717201 | 17 | 48174262  | PDK2      | 5'UTR            | S_Shore | 0.605±0.051 | 0.502±0.113 | 0.104 | 3.85E-03 | 1.98E-20 | -0.435 |
| cg12206103 | 15 | 90319516  | MESP2     | TSS200           | N_Shore | 0.252±0.062 | 0.149±0.046 | 0.103 | 1.62E-03 | 2.79E-09 | -0.287 |
| cg16981943 | 10 | 91458029  | FLJ37201  | TSS1500          | N_Shelf | 0.82±0.047  | 0.717±0.16  | 0.103 | 2.00E-02 | 1.41E-05 | -0.212 |
| cg00525011 | 16 | 122031    | RHBDF1    | 5'UTR/1st intron | Island  | 0.259±0.059 | 0.156±0.042 | 0.103 | 1.15E-03 | 2.45E-05 | -0.206 |
| cg17125688 | 2  | 20646181  | RHOB      | TSS1500          | N_Shore | 0.156±0.101 | 0.053±0.032 | 0.103 | 2.34E-02 | 1.13E-17 | -0.405 |
| cg06553312 | 19 | 50706723  | MYH14     | TSS200           | N_Shore | 0.22±0.069  | 0.117±0.072 | 0.103 | 3.83E-03 | 1.09E-07 | -0.258 |
| cg13722127 | 7  | 150037890 | RARRES2   | 5'UTR/1st intron | Island  | 0.29±0.049  | 0.187±0.04  | 0.103 | 2.73E-04 | 5.94E-08 | -0.263 |
| cg06010659 | 5  | 1634505   | LOC728613 | TSS1500          | S_Shore | 0.298±0.089 | 0.195±0.134 | 0.103 | 3.19E-02 | 1.97E-12 | -0.337 |
| cg01017689 | 5  | 76376266  | ZBED3     | 5'UTR/1st intron | S_Shelf | 0.805±0.047 | 0.702±0.152 | 0.103 | 1.61E-02 | 7.19E-10 | -0.298 |
| cg05451722 | 8  | 145065385 | GRINA     | 5'UTR            | Island  | 0.246±0.094 | 0.143±0.076 | 0.103 | 1.92E-02 | 9.91E-08 | -0.259 |
| cg21649442 | 16 | 82044960  | SDR42E1   | 5'UTR/1st intron | Island  | 0.225±0.084 | 0.123±0.045 | 0.103 | 1.01E-02 | 6.85E-19 | -0.418 |
| cg16387467 | 18 | 72166016  | CNDP2     | 5'UTR/1st intron | S_Shore | 0.297±0.085 | 0.194±0.063 | 0.103 | 1.17E-02 | 2.71E-05 | -0.205 |
| cg03805684 | 11 | 61561219  | FEN1      | 5'UTR/1st intron | S_Shore | 0.356±0.076 | 0.253±0.108 | 0.102 | 1.27E-02 | 1.16E-13 | -0.355 |
| cg20322299 | 2  | 118849751 | INSIG2    | 5'UTR            | S_Shelf | 0.808±0.023 | 0.706±0.164 | 0.102 | 1.83E-02 | 5.03E-24 | -0.470 |
| cg18153630 | 13 | 99405124  | SLC15A1   | TSS200           | S_Shore | 0.207±0.059 | 0.105±0.033 | 0.102 | 1.25E-03 | 6.48E-08 | -0.262 |
| cg18734428 | 15 | 84322277  | ADAMTSL3  | TSS1500          | N_Shore | 0.169±0.089 | 0.067±0.034 | 0.102 | 1.36E-02 | 2.80E-05 | -0.205 |
| cg26478401 | 10 | 90749920  | FAS       | TSS1500          | N_Shore | 0.236±0.073 | 0.134±0.084 | 0.102 | 6.63E-03 | 3.66E-12 | -0.334 |
| cg14874337 | 19 | 38864187  | PSMD8     | TSS1500          | N_Shore | 0.757±0.093 | 0.655±0.148 | 0.102 | 4.52E-02 | 1.02E-07 | -0.259 |
| cg26921612 | 22 | 32150828  | DEPDC5    | 5'UTR/1st intron | S_Shore | 0.193±0.055 | 0.091±0.022 | 0.102 | 9.72E-04 | 4.27E-09 | -0.284 |
| cg03802191 | 1  | 234615169 | TARBP1    | TSS1500          | S_Shore | 0.352±0.084 | 0.251±0.118 | 0.102 | 2.20E-02 | 8.30E-11 | -0.313 |
| cg00747849 | 22 | 19165386  | SLC25A1   | 5'UTR            | Island  | 0.239±0.062 | 0.137±0.045 | 0.102 | 1.83E-03 | 9.36E-10 | -0.296 |
| cg23712458 | 17 | 189002    | RPH3AL    | 5'UTR/1st intron | S_Shelf | 0.444±0.056 | 0.343±0.102 | 0.101 | 3.49E-03 | 4.02E-07 | -0.247 |
| cg05029558 | 8  | 71581784  | XKR9      | 5'UTR/1st intron | S_Shore | 0.288±0.083 | 0.186±0.06  | 0.101 | 1.03E-02 | 4.11E-12 | -0.333 |
| cg04532834 | 19 | 4535188   | PLIN5     | 5'UTR/1st exon   | Island  | 0.316±0.066 | 0.215±0.041 | 0.101 | 2.76E-03 | 7.54E-10 | -0.297 |
| cg20303399 | 8  | 26722965  | ADRA1A    | 1st exon         | Island  | 0.232±0.056 | 0.131±0.053 | 0.101 | 8.36E-04 | 2.24E-08 | -0.271 |
| cg11136751 | 3  | 46608069  | LRRC2     | TSS200           | S_Shore | 0.171±0.057 | 0.07±0.023  | 0.101 | 1.32E-03 | 6.59E-07 | -0.242 |
| cg27021512 | 13 | 47371635  | ESD       | TSS1500          | S_Shore | 0.204±0.06  | 0.103±0.031 | 0.100 | 1.65E-03 | 1.59E-08 | -0.274 |
| cg00860380 | 1  | 54871988  | SSBP3     | 5'UTR/1st exon   | N_Shore | 0.403±0.047 | 0.303±0.086 | 0.100 | 8.66E-04 | 7.51E-06 | -0.219 |
| cg14993491 | 1  | 55504971  | PCSK9     | TSS1500          | N_Shore | 0.218±0.072 | 0.118±0.04  | 0.100 | 4.84E-03 | 2.56E-06 | -0.229 |
| cg07181881 | 2  | 170591239 | KLHL23    | 5'UTR/1st intron | S_Shore | 0.172±0.073 | 0.072±0.036 | 0.100 | 5.55E-03 | 1.30E-05 | -0.213 |
| cg21235334 | 20 | 31351171  | DNMT3B    | 5'UTR/1st intron | Island  | 0.197±0.057 | 0.097±0.032 | 0.100 | 1.26E-03 | 1.21E-05 | -0.214 |

<sup>a</sup>Probe IDs for the Infinium MethylationEPIC BeadChip (Illumina). <sup>b</sup>National Center for Biotechnology Information (NCBI) Database (Genome Build 37/hg19). <sup>c</sup>TSS1500, from 200 bp upstream of the transcription start site (TSS) to 1500 bp upstream of it; TSS200, from the TSS to 200 bp upstream of it; UTR, untranslated region; Gene body, second exon and downstream on the RefSeq database (<http://www.ncbi.nlm.nih.gov/refseq/>). <sup>d</sup>N-Shelf, 2000 bp region 5' adjacent to N-Shore; N-Shore, 2000 bp region 5' adjacent to CpG island; S-Shore, 2000 bp region 3' adjacent to CpG island; S-Shelf, 2000 bp region 3' adjacent to SShore based on the UCSC Genome Browser (<https://genome.ucsc.edu/>). <sup>e</sup>Evaluated using the Cancer Genome Atlas database (<https://www.cancer.gov/about-nci/organization/ccg/research/structural-genomics/tcga>).

**b** The 2,093 probes showing DNA hypomethylation in Cluster I in comparison with Cluster II ( $\Delta\beta_{i-II} < -0.1$ ).

| ProbeID <sup>a</sup> | Chromosome | Position <sup>b</sup> | Gene symbol | Annotation <sup>c</sup> | CpG type <sup>d</sup> | DNA methylatio levels (β value) |                      |                    |                |          | Inverse correlation with mRNA expression levels <sup>e</sup> |          |
|----------------------|------------|-----------------------|-------------|-------------------------|-----------------------|---------------------------------|----------------------|--------------------|----------------|----------|--------------------------------------------------------------|----------|
|                      |            |                       |             |                         |                       | Cluster I (mean±SD)             | Cluster II (mean±SD) | Δβ <sub>I-II</sub> | Welch's T-test |          |                                                              |          |
|                      |            |                       |             |                         |                       |                                 |                      |                    |                | <i>P</i> | <i>P</i>                                                     | <i>r</i> |
| cg07759570           | 19         | 35491951              | GRAMD1A     | 5'UTR/1st intron        | Island                | 0.148±0.118                     | 0.683±0.245          | -0.535             | 9.94E-08       | 3.63E-25 | -0.480                                                       |          |
| cg18056600           | 17         | 4642047               | ZMYND15     | TSS1500                 | Island                | 0.23±0.113                      | 0.723±0.075          | -0.493             | 5.65E-07       | 1.66E-16 | -0.391                                                       |          |
| cg15346168           | 14         | 24836194              | NFATC4      | 5'UTR/1st exon          | N_Shore               | 0.263±0.208                     | 0.752±0.194          | -0.489             | 8.57E-05       | 8.72E-09 | -0.279                                                       |          |
| cg02716776           | 19         | 3178413               | S1PR4       | TSS1500                 | N_Shore               | 0.322±0.193                     | 0.788±0.11           | -0.466             | 1.20E-04       | 2.77E-18 | -0.412                                                       |          |
| cg19841506           | 17         | 4642056               | ZMYND15     | TSS1500                 | Island                | 0.213±0.091                     | 0.679±0.108          | -0.466             | 4.48E-09       | 4.12E-17 | -0.398                                                       |          |
| cg01434608           | 16         | 66637927              | CMTM3       | 5'UTR/1st exon          | N_Shore               | 0.198±0.15                      | 0.655±0.24           | -0.457             | 7.90E-06       | 8.47E-12 | -0.328                                                       |          |
| cg20780953           | 19         | 11450511              | RAB3D       | TSS200                  | S_Shore               | 0.237±0.117                     | 0.686±0.077          | -0.448             | 2.05E-06       | 3.22E-36 | -0.566                                                       |          |
| cg09866102           | 16         | 31214134              | PYCARD      | TSS200                  | Island                | 0.191±0.23                      | 0.637±0.247          | -0.446             | 5.02E-04       | 7.00E-09 | -0.280                                                       |          |
| cg22417733           | 6          | 153303409             | FBXO5       | 5'UTR/1st intron        | Island                | 0.204±0.145                     | 0.646±0.244          | -0.442             | 9.82E-06       | 5.48E-15 | -0.372                                                       |          |
| cg00651829           | 22         | 23413066              | GNAZ        | 5'UTR/1st intron        | Island                | 0.085±0.119                     | 0.523±0.261          | -0.438             | 4.77E-06       | 3.04E-10 | -0.304                                                       |          |
| cg06154084           | 10         | 102792249             | PDZD7       | TSS1500                 | S_Shelf               | 0.213±0.191                     | 0.64±0.253           | -0.427             | 1.72E-04       | 5.94E-13 | -0.345                                                       |          |

|            |    |           |                 |                  |         |             |             |        |          |          |        |
|------------|----|-----------|-----------------|------------------|---------|-------------|-------------|--------|----------|----------|--------|
| cg21207028 | 20 | 327619    | <i>NRSN2</i>    | 1st exon         | Island  | 0.284±0.189 | 0.705±0.174 | -0.421 | 1.44E-04 | 1.20E-45 | -0.623 |
| cg17225129 | 6  | 33244755  | <i>B3GALT4</i>  | TSS200           | Island  | 0.378±0.231 | 0.794±0.135 | -0.416 | 9.82E-04 | 3.11E-48 | -0.637 |
| cg05896042 | 19 | 11450090  | <i>RAB3D</i>    | 5'UTR/1st intron | Island  | 0.346±0.187 | 0.76±0.067  | -0.414 | 3.27E-04 | 2.24E-48 | -0.638 |
| cg26381352 | 6  | 33244799  | <i>B3GALT4</i>  | TSS200           | Island  | 0.342±0.196 | 0.753±0.117 | -0.411 | 3.33E-04 | 1.63E-48 | -0.638 |
| cg09816471 | 16 | 11761860  | <i>SNN</i>      | TSS1500          | N_Shore | 0.307±0.129 | 0.712±0.094 | -0.405 | 9.02E-06 | 1.69E-08 | -0.273 |
| cg05015913 | 8  | 38645613  | <i>TACC1</i>    | 5'UTR            | Island  | 0.344±0.163 | 0.749±0.12  | -0.404 | 7.09E-05 | 2.12E-05 | -0.208 |
| cg08613144 | 2  | 133428836 | <i>LYPD1</i>    | 5'UTR/1st exon   | Island  | 0.314±0.166 | 0.718±0.153 | -0.403 | 6.58E-05 | 3.12E-16 | -0.388 |
| cg18302606 | 19 | 39904402  | <i>PLEKHG2</i>  | 5'UTR/1st intron | Island  | 0.332±0.129 | 0.734±0.116 | -0.402 | 5.82E-06 | 3.00E-26 | -0.490 |
| cg10380585 | 1  | 211500971 | <i>TRAF5</i>    | 5'UTR/1st intron | S_Shore | 0.298±0.205 | 0.697±0.198 | -0.399 | 4.69E-04 | 6.62E-36 | -0.564 |
| cg26348348 | 2  | 133428993 | <i>LYPD1</i>    | 5'UTR/1st exon   | S_Shore | 0.383±0.204 | 0.779±0.127 | -0.397 | 5.57E-04 | 9.07E-20 | -0.428 |
| cg02996471 | 19 | 3178512   | <i>S1PR4</i>    | TSS1500          | N_Shore | 0.412±0.181 | 0.808±0.078 | -0.396 | 3.11E-04 | 2.33E-18 | -0.413 |
| cg08730348 | 16 | 31214307  | <i>PYCARD</i>   | TSS1500          | S_Shore | 0.187±0.124 | 0.583±0.114 | -0.396 | 4.37E-06 | 1.17E-16 | -0.393 |
| cg08713365 | 20 | 327623    | <i>NRSN2</i>    | 1st exon         | Island  | 0.314±0.21  | 0.709±0.172 | -0.395 | 6.17E-04 | 3.94E-50 | -0.647 |
| cg05554936 | 19 | 11450261  | <i>RAB3D</i>    | 5'UTR/1st exon   | Island  | 0.248±0.177 | 0.643±0.101 | -0.395 | 2.15E-04 | 2.33E-25 | -0.482 |
| cg23493132 | 19 | 54370796  | <i>MYADM</i>    | 5'UTR/1st intron | N_Shore | 0.333±0.139 | 0.725±0.1   | -0.392 | 2.36E-05 | 1.99E-22 | -0.455 |
| cg02454890 | 15 | 90544015  | <i>ZNF710</i>   | TSS1500          | S_Shore | 0.332±0.237 | 0.724±0.258 | -0.392 | 1.89E-03 | 2.16E-12 | -0.337 |
| cg02064724 | 14 | 74179953  | <i>PNMA1</i>    | 1st exon         | N_Shore | 0.251±0.14  | 0.643±0.099 | -0.391 | 2.62E-05 | 4.49E-29 | -0.513 |
| cg03096126 | 18 | 56531159  | <i>ZNF532</i>   | 5'UTR/1st intron | Island  | 0.315±0.228 | 0.702±0.159 | -0.388 | 1.35E-03 | 2.15E-27 | -0.500 |
| cg10523105 | 14 | 74178976  | <i>PNMA1</i>    | 1st exon/3'UTR   | N_Shore | 0.367±0.163 | 0.749±0.074 | -0.382 | 1.85E-04 | 7.13E-38 | -0.577 |
| cg17752112 | 19 | 11450515  | <i>RAB3D</i>    | TSS200           | S_Shore | 0.204±0.138 | 0.585±0.137 | -0.381 | 1.72E-05 | 8.16E-28 | -0.503 |
| cg08047482 | 19 | 11449933  | <i>RAB3D</i>    | 5'UTR/1st intron | N_Shore | 0.368±0.087 | 0.749±0.072 | -0.381 | 2.04E-07 | 3.20E-49 | -0.642 |
| cg21583565 | 2  | 174219336 | <i>CDC47</i>    | TSS1500          | N_Shore | 0.3±0.117   | 0.677±0.212 | -0.377 | 6.57E-06 | 1.67E-19 | -0.425 |
| cg05214748 | 16 | 31214335  | <i>PYCARD</i>   | TSS1500          | S_Shore | 0.182±0.096 | 0.559±0.136 | -0.377 | 1.63E-07 | 8.15E-21 | -0.439 |
| cg13880094 | 19 | 35491738  | <i>GRAMD1A</i>  | 5'UTR/1st intron | Island  | 0.115±0.086 | 0.491±0.236 | -0.376 | 4.35E-06 | 2.64E-19 | -0.423 |
| cg14502728 | 4  | 78978537  | <i>FRAS1</i>    | TSS200           | N_Shore | 0.209±0.208 | 0.585±0.322 | -0.376 | 1.94E-03 | 1.73E-11 | -0.323 |
| cg20664636 | 17 | 1959596   | <i>HIC1</i>     | 5'UTR/1st intron | Island  | 0.452±0.137 | 0.828±0.054 | -0.376 | 6.95E-05 | 3.04E-06 | -0.228 |
| cg14355894 | 17 | 47075281  | <i>IGF2BP1</i>  | 1st exon         | Island  | 0.137±0.08  | 0.512±0.233 | -0.375 | 3.26E-06 | 4.45E-08 | -0.266 |
| cg05907835 | 16 | 31214346  | <i>PYCARD</i>   | TSS1500          | S_Shore | 0.159±0.078 | 0.534±0.136 | -0.375 | 1.08E-08 | 9.45E-21 | -0.438 |
| cg05852537 | 20 | 33759753  | <i>PROCR</i>    | 5'UTR/1st exon   | N_Shelf | 0.294±0.159 | 0.668±0.13  | -0.374 | 9.64E-05 | 5.21E-22 | -0.451 |
| cg23350336 | 10 | 70321554  | <i>TET1</i>     | 5'UTR/1st intron | S_Shore | 0.28±0.182  | 0.654±0.238 | -0.374 | 3.81E-04 | 4.08E-06 | -0.225 |
| cg00555905 | 17 | 79140481  | <i>AATK</i>     | TSS1500          | S_Shore | 0.345±0.179 | 0.712±0.178 | -0.366 | 3.08E-04 | 2.10E-16 | -0.390 |
| cg20530204 | 6  | 33244709  | <i>B3GALT4</i>  | TSS1500          | Island  | 0.267±0.166 | 0.631±0.139 | -0.363 | 1.77E-04 | 3.49E-45 | -0.620 |
| cg16904330 | 3  | 119299162 | <i>ADPRH</i>    | 5'UTR/1st intron | S_Shore | 0.392±0.161 | 0.754±0.063 | -0.362 | 2.69E-04 | 7.11E-38 | -0.577 |
| cg16831623 | 20 | 6750617   | <i>BMP2</i>     | 5'UTR/1st intron | S_Shore | 0.281±0.125 | 0.643±0.2   | -0.362 | 1.52E-05 | 1.04E-09 | -0.295 |
| cg08543966 | 19 | 35646150  | <i>FXDY5</i>    | 1st exon         | S_Shore | 0.276±0.186 | 0.638±0.131 | -0.362 | 5.06E-04 | 1.14E-11 | -0.326 |
| cg11153694 | 5  | 141017797 | <i>RELL2</i>    | 1st exon         | S_Shore | 0.272±0.162 | 0.634±0.109 | -0.362 | 1.87E-04 | 8.25E-09 | -0.279 |
| cg08584377 | 7  | 5632269   | <i>FSCN1</i>    | TSS200           | N_Shore | 0.302±0.179 | 0.661±0.229 | -0.359 | 4.67E-04 | 2.74E-06 | -0.229 |
| cg05744675 | 16 | 88717723  | <i>CYBA</i>     | TSS1500          | N_Shelf | 0.251±0.105 | 0.608±0.17  | -0.357 | 1.70E-06 | 2.05E-25 | -0.483 |
| cg20766090 | 11 | 2159131   | <i>IGF2</i>     | 5'UTR            | Island  | 0.258±0.075 | 0.614±0.176 | -0.356 | 1.80E-07 | 1.17E-21 | -0.447 |
| cg07000334 | 12 | 54785286  | <i>ZNF385A</i>  | TSS200           | S_Shore | 0.439±0.169 | 0.793±0.069 | -0.355 | 4.26E-04 | 5.17E-10 | -0.300 |
| cg20331595 | 20 | 327607    | <i>NRSN2</i>    | 1st exon         | Island  | 0.162±0.132 | 0.517±0.174 | -0.355 | 2.14E-05 | 2.06E-32 | -0.539 |
| cg23676480 | 20 | 25039812  | <i>ACSS1</i>    | TSS1500          | S_Shore | 0.359±0.189 | 0.712±0.123 | -0.353 | 7.39E-04 | 1.45E-07 | -0.256 |
| cg13354988 | 2  | 263656    | <i>SH3YL1</i>   | 5'UTR/1st intron | Island  | 0.386±0.155 | 0.738±0.073 | -0.352 | 2.25E-04 | 1.38E-36 | -0.568 |
| cg25731261 | 19 | 47736018  | <i>BBC3</i>     | 5'UTR/1st exon   | S_Shore | 0.382±0.092 | 0.734±0.097 | -0.352 | 3.95E-07 | 2.58E-09 | -0.288 |
| cg20118643 | 15 | 60690852  | <i>ANXA2</i>    | TSS1500          | Island  | 0.363±0.168 | 0.712±0.175 | -0.350 | 2.62E-04 | 4.49E-18 | -0.409 |
| cg06236559 | 18 | 45458303  | <i>SMAD2</i>    | TSS1500          | S_Shore | 0.444±0.223 | 0.793±0.124 | -0.350 | 2.46E-03 | 1.25E-10 | -0.310 |
| cg12100791 | 16 | 31214417  | <i>PYCARD</i>   | TSS1500          | S_Shore | 0.379±0.12  | 0.727±0.112 | -0.349 | 1.14E-05 | 2.39E-18 | -0.412 |
| cg03294491 | 18 | 45458243  | <i>SMAD2</i>    | TSS1500          | S_Shore | 0.424±0.194 | 0.772±0.12  | -0.348 | 9.90E-04 | 3.88E-08 | -0.267 |
| cg02441711 | 17 | 80291105  | <i>SECTM1</i>   | 5'UTR/1st intron | Island  | 0.383±0.14  | 0.73±0.064  | -0.348 | 1.25E-04 | 2.61E-15 | -0.376 |
| cg08831594 | 10 | 71211006  | <i>TSPAN15</i>  | TSS1500          | N_Shore | 0.144±0.141 | 0.491±0.199 | -0.347 | 7.03E-05 | 1.14E-11 | -0.326 |
| cg10881225 | 2  | 9984929   | <i>TAF1B</i>    | 5'UTR/1st intron | S_Shore | 0.451±0.16  | 0.797±0.062 | -0.346 | 3.63E-04 | 3.35E-11 | -0.319 |
| cg15472071 | 1  | 16085984  | <i>FBLIM1</i>   | 5'UTR            | S_Shore | 0.381±0.142 | 0.727±0.109 | -0.346 | 7.82E-05 | 9.92E-31 | -0.526 |
| cg11353035 | 17 | 6926414   | <i>BCL6B</i>    | 5'UTR/1st exon   | Island  | 0.376±0.115 | 0.722±0.084 | -0.346 | 1.29E-05 | 1.38E-07 | -0.256 |
| cg07473175 | 12 | 47474262  | <i>AMIGO2</i>   | TSS1500          | S_Shore | 0.288±0.203 | 0.633±0.186 | -0.346 | 1.34E-03 | 2.75E-27 | -0.499 |
| cg11032268 | 7  | 5632272   | <i>FSCN1</i>    | TSS200           | N_Shore | 0.212±0.144 | 0.558±0.259 | -0.346 | 2.48E-04 | 1.19E-05 | -0.214 |
| cg07354371 | 1  | 43736391  | <i>TMEM125</i>  | 5'UTR            | N_Shelf | 0.351±0.13  | 0.696±0.065 | -0.345 | 6.77E-05 | 2.83E-33 | -0.545 |
| cg17983217 | 6  | 31698223  | <i>DDAH2</i>    | TSS1500          | Island  | 0.414±0.205 | 0.758±0.068 | -0.344 | 1.87E-03 | 1.01E-14 | -0.369 |
| cg17655624 | 12 | 54785320  | <i>ZNF385A</i>  | TSS1500          | S_Shore | 0.427±0.189 | 0.77±0.065  | -0.344 | 1.14E-03 | 6.44E-10 | -0.298 |
| cg08096786 | 16 | 57571099  | <i>CCDC102A</i> | TSS1500          | S_Shore | 0.431±0.225 | 0.774±0.058 | -0.342 | 3.39E-03 | 5.73E-17 | -0.397 |
| cg24046411 | 16 | 88717646  | <i>CYBA</i>     | TSS200           | N_Shelf | 0.433±0.155 | 0.774±0.043 | -0.341 | 3.69E-04 | 8.46E-44 | -0.613 |
| cg09142578 | 17 | 79140486  | <i>AATK</i>     | TSS1500          | S_Shore | 0.369±0.166 | 0.71±0.167  | -0.341 | 2.88E-04 | 7.77E-18 | -0.407 |
| cg16335762 | 16 | 66637919  | <i>CMTM3</i>    | 5'UTR/1st exon   | N_Shore | 0.326±0.169 | 0.666±0.206 | -0.341 | 4.09E-04 | 2.12E-13 | -0.351 |
| cg13682140 | 17 | 41978218  | <i>MPP2</i>     | 5'UTR            | S_Shore | 0.329±0.151 | 0.67±0.152  | -0.341 | 1.26E-04 | 5.55E-09 | -0.282 |
| cg00067414 | 6  | 151188081 | <i>MTHFD1L</i>  | 1st exon         | Island  | 0.276±0.204 | 0.616±0.139 | -0.340 | 1.61E-03 | 2.19E-26 | -0.491 |
| cg19725553 | 7  | 43797898  | <i>BLVRA</i>    | TSS1500          | Island  | 0.335±0.183 | 0.675±0.124 | -0.339 | 7.40E-04 | 2.97E-11 | -0.320 |
| cg24337786 | 19 | 39108672  | <i>MAP4K1</i>   | 5'UTR/1st exon   | N_Shore | 0.429±0.196 | 0.768±0.082 | -0.338 | 1.48E-03 | 3.45E-20 | -0.432 |
| cg24940138 | 17 | 41363741  | <i>TMEM106A</i> | TSS200           | Island  | 0.309±0.272 | 0.646±0.261 | -0.338 | 1.11E-02 | 2.60E-43 | -0.610 |
| cg13916266 | 17 | 7787658   | <i>CHD3</i>     | TSS1500          | N_Shore | 0.248±0.119 | 0.586±0.177 | -0.337 | 1.54E-05 | 7.78E-27 | -0.495 |
| cg11059617 | 14 | 61191084  | <i>SIX4</i>     | TSS1500          | S_Shore | 0.122±0.168 | 0.458±0.35  | -0.336 | 2.97E-03 | 1.19E-06 | -0.237 |
| cg04355435 | 1  | 43736290  | <i>TMEM125</i>  | 5'UTR            | N_Shelf | 0.318±0.117 | 0.655±0.06  | -0.336 | 3.67E-05 | 8.61E-29 | -0.511 |
| cg13640200 | 12 | 47474202  | <i>AMIGO2</i>   | TSS1500          | S_Shore | 0.232±0.139 | 0.568±0.175 | -0.336 | 6.89E-05 | 2.32E-26 | -0.491 |
| cg08794157 | 17 | 15164627  | <i>PMP22</i>    | 5'UTR/1st intron | Island  | 0.362±0.112 | 0.695±0.186 | -0.332 | 1.29E-05 | 8.85E-08 | -0.260 |
| cg19660812 | 8  | 38617447  | <i>TACC1</i>    | 5'UTR/1st intron | S_Shelf | 0.37±0.13   | 0.702±0.174 | -0.332 | 4.13E-05 | 4.13E-08 | -0.266 |
| cg16725050 | 2  | 220117771 | <i>TUBA4A</i>   | 5'UTR/1st intron | N_Shore | 0.193±0.113 | 0.525±0.282 | -0.332 | 2.65E-04 | 1.12E-33 | -0.548 |
| cg02183170 | 14 | 55595698  | <i>LGALS3</i>   | TSS1500          | Island  | 0.356±0.204 | 0.688±0.176 | -0.332 | 1.83E-03 | 2.56E-32 | -0.538 |
| cg20728696 | 11 | 2158702   | <i>IGF2</i>     | 5'UTR            | N_Shore | 0.23±0.113  | 0.561±0.183 | -0.331 | 1.31E-05 | 6.98E-16 | -0.383 |
| cg08296680 | 17 | 80186275  | <i>SLC16A3</i>  | TSS1500          | Island  | 0.427±0.18  | 0.758±0.097 | -0.331 | 8.91E-04 | 2.20E-08 | -0.271 |
| cg19156220 | 6  | 33244752  | <i>B3GALT4</i>  | TSS200           | Island  | 0.484±0.214 | 0.815±0.077 | -0.331 | 2.91E-03 | 4.14E-57 | -0.680 |
| cg13163919 | 15 | 70388014  | <i>TLE3</i>     | TSS1500          | Island  | 0.362±0.149 | 0.693±0.101 | -0.331 | 1.94E-04 | 6.03E-09 | -0.282 |
| cg11199810 | 1  | 150123146 | <i>PLEKHO1</i>  | 5'UTR            | S_Shore | 0.447±0.109 | 0.778±0.071 | -0.331 | 1.61E-05 | 8.12E-17 | -0.395 |
| cg22502206 | 15 | 60690826  | <i>ANXA2</i>    | TSS1500          | Island  | 0.343±0.176 | 0.674±0.214 | -0.331 | 7.57E-04 | 5.31E-18 | -0.408 |
| cg02787991 | 17 | 80291405  | <i>SECTM1</i>   | 5'UTR/1st intron | Island  | 0.385±0.16  | 0.715±0.044 | -0.330 | 5.62E-04 | 6.34E-14 | -0.358 |
| cg15786280 | 4  | 15779879  | <i>CD38</i>     | TSS200           | N_Shore | 0.315±0.125 | 0.644±0.158 | -0.329 | 2.75E-05 | 2.20E-15 | -0.377 |
| cg11131549 | 1  | 211500852 | <i>TRAF5</i>    | 5'UTR/1st intron | S_Shore | 0.256±0.177 | 0.584±0.192 | -0.328 | 7.43E-04 | 2.15E-33 | -0.546 |
| cg03870138 | 16 | 88717850  | <i>CYBA</i>     | TSS1500          | N_Shelf | 0.245±0.08  |             |        |          |          |        |

|            |    |           |          |                  |         |             |             |        |          |          |        |
|------------|----|-----------|----------|------------------|---------|-------------|-------------|--------|----------|----------|--------|
| cg26705574 | 14 | 24836219  | NFATC4   | 5'UTR/1st exon   | N_Shore | 0.269±0.147 | 0.594±0.166 | -0.326 | 1.55E-04 | 1.47E-08 | -0.275 |
| cg06744119 | 10 | 88730599  | AGAP11   | 5'UTR/1st exon   | S_Shore | 0.402±0.163 | 0.726±0.113 | -0.324 | 4.40E-04 | 3.06E-10 | -0.304 |
| cg15026277 | 17 | 41363789  | TMEM106A | TSS200           | Island  | 0.268±0.261 | 0.59±0.26   | -0.323 | 1.18E-02 | 1.91E-42 | -0.605 |
| cg03710719 | 19 | 36389795  | NFKBID   | 5'UTR/1st intron | N_Shore | 0.378±0.171 | 0.7±0.103   | -0.323 | 7.23E-04 | 8.50E-15 | -0.370 |
| cg18923721 | 17 | 8868669   | PIK3R5   | 5'UTR/1st intron | Island  | 0.305±0.126 | 0.628±0.141 | -0.322 | 3.45E-05 | 1.83E-13 | -0.352 |
| cg10246531 | 16 | 88717628  | CYBA     | TSS200           | N_Shelf | 0.509±0.135 | 0.831±0.042 | -0.322 | 2.05E-04 | 1.88E-36 | -0.567 |
| cg04153784 | 7  | 127672235 | LRRC4    | TSS1500          | Island  | 0.35±0.112  | 0.671±0.106 | -0.322 | 1.22E-05 | 9.53E-10 | -0.296 |
| cg15543281 | 6  | 33245181  | B3GALT4  | 5'UTR/1st exon   | Island  | 0.468±0.195 | 0.789±0.064 | -0.321 | 2.06E-03 | 6.64E-67 | -0.719 |
| cg05057777 | 12 | 104697631 | EID3     | 5'UTR/1st exon   | Island  | 0.325±0.176 | 0.647±0.184 | -0.321 | 8.27E-04 | 1.92E-17 | -0.402 |
| cg18861421 | 19 | 11450590  | RAB3D    | TSS1500          | S_Shore | 0.378±0.056 | 0.699±0.072 | -0.321 | 5.35E-10 | 2.85E-28 | -0.507 |
| cg04212150 | 18 | 56531132  | ZNF532   | 5'UTR/1st intron | Island  | 0.269±0.145 | 0.59±0.147  | -0.321 | 4.17E-04 | 3.01E-25 | -0.481 |
| cg11772919 | 6  | 33245328  | B3GALT4  | 1st exon         | Island  | 0.493±0.176 | 0.814±0.054 | -0.321 | 1.16E-03 | 5.49E-64 | -0.708 |
| cg03565081 | 14 | 23478970  | C14orf93 | 5'UTR/1st intron | S_Shelf | 0.455±0.169 | 0.775±0.097 | -0.321 | 7.11E-04 | 9.97E-08 | -0.259 |
| cg05381423 | 19 | 5340713   | PTPRS    | 5'UTR/1st exon   | Island  | 0.299±0.159 | 0.619±0.234 | -0.320 | 6.15E-04 | 4.13E-08 | -0.266 |
| cg13969273 | 16 | 69760564  | NQO1     | 5'UTR/1st exon   | S_Shore | 0.243±0.179 | 0.563±0.274 | -0.320 | 2.06E-03 | 6.89E-26 | -0.487 |
| cg11073571 | 4  | 78978565  | FRAS1    | TSS200           | N_Shore | 0.158±0.174 | 0.478±0.29  | -0.320 | 2.15E-03 | 8.49E-07 | -0.240 |
| cg08116775 | 8  | 135726595 | ZFAT     | TSS1500          | S_Shore | 0.502±0.134 | 0.822±0.054 | -0.320 | 1.76E-04 | 1.14E-05 | -0.214 |
| cg14897419 | 10 | 134121413 | STK2C    | 5'UTR/1st exon   | Island  | 0.192±0.174 | 0.511±0.274 | -0.319 | 1.85E-03 | 7.68E-07 | -0.241 |
| cg26110130 | 1  | 42128455  | HIVEP3   | 5'UTR            | Island  | 0.353±0.206 | 0.672±0.167 | -0.319 | 2.62E-03 | 1.96E-07 | -0.253 |
| cg14185025 | 14 | 100259341 | EML1     | TSS1500          | Island  | 0.21±0.163  | 0.528±0.22  | -0.318 | 6.69E-04 | 1.05E-05 | -0.215 |
| cg18107893 | 19 | 33166844  | RGS9BP   | 5'UTR/1st exon   | Island  | 0.31±0.165  | 0.627±0.138 | -0.317 | 5.25E-04 | 3.70E-08 | -0.267 |
| cg18107893 | 19 | 33166844  | ANKRD27  | TSS1500          | Island  | 0.31±0.165  | 0.627±0.138 | -0.317 | 5.25E-04 | 2.18E-05 | -0.208 |
| cg21211480 | 17 | 41363774  | TMEM106A | TSS200           | Island  | 0.259±0.257 | 0.576±0.283 | -0.317 | 1.32E-02 | 4.59E-42 | -0.602 |
| cg17322655 | 2  | 242802127 | PDCD1    | TSS1500          | N_Shelf | 0.384±0.149 | 0.7±0.156   | -0.316 | 2.26E-04 | 3.16E-09 | -0.287 |
| cg07533239 | 12 | 6422131   | PLEKHG6  | 5'UTR/1st exon   | S_Shelf | 0.339±0.097 | 0.655±0.137 | -0.316 | 2.14E-06 | 1.50E-05 | -0.211 |
| cg09587549 | 16 | 31214126  | PYCARD   | TSS200           | Island  | 0.25±0.149  | 0.565±0.198 | -0.316 | 2.89E-04 | 1.59E-08 | -0.274 |
| cg00588621 | 12 | 104697620 | EID3     | 5'UTR/1st exon   | Island  | 0.364±0.191 | 0.679±0.185 | -0.316 | 1.73E-03 | 7.42E-18 | -0.407 |
| cg10521852 | 19 | 19739820  | LPAR2    | TSS1500          | S_Shore | 0.473±0.173 | 0.788±0.095 | -0.315 | 9.58E-04 | 1.62E-20 | -0.436 |
| cg20785674 | 1  | 150123490 | PLEKHO1  | 5'UTR            | S_Shore | 0.345±0.072 | 0.66±0.114  | -0.315 | 3.36E-08 | 2.99E-23 | -0.463 |
| cg26259171 | 19 | 49255779  | FUT1     | 5'UTR            | S_Shore | 0.405±0.136 | 0.721±0.072 | -0.315 | 1.82E-04 | 2.26E-10 | -0.306 |
| cg24008544 | 17 | 41363899  | TMEM106A | 5'UTR/1st exon   | Island  | 0.287±0.233 | 0.602±0.241 | -0.315 | 7.12E-03 | 3.00E-43 | -0.609 |
| cg23859630 | 6  | 32160455  | GPSM3    | 5'UTR            | N_Shelf | 0.336±0.078 | 0.65±0.186  | -0.314 | 2.92E-06 | 2.94E-12 | -0.335 |
| cg17382541 | 19 | 54370839  | MYADM    | 5'UTR/1st intron | N_Shore | 0.351±0.163 | 0.665±0.149 | -0.314 | 4.96E-04 | 3.92E-14 | -0.361 |
| cg13038241 | 7  | 5632281   | FSCN1    | TSS200           | N_Shore | 0.343±0.152 | 0.657±0.189 | -0.314 | 3.25E-04 | 2.21E-07 | -0.252 |
| cg03780927 | 11 | 118781150 | BCL9L    | 5'UTR/1st exon   | Island  | 0.393±0.156 | 0.707±0.199 | -0.314 | 4.41E-04 | 3.72E-15 | -0.374 |
| cg18348142 | 12 | 47474055  | AMIGO2   | TSS1500          | Island  | 0.264±0.192 | 0.577±0.259 | -0.314 | 2.92E-03 | 1.55E-19 | -0.425 |
| cg16367511 | 2  | 74425523  | MTHFD2   | TSS200           | Island  | 0.408±0.161 | 0.721±0.074 | -0.313 | 6.60E-04 | 4.83E-50 | -0.646 |
| cg16977706 | 11 | 2160129   | IGF2     | 5'UTR            | Island  | 0.419±0.178 | 0.731±0.151 | -0.312 | 1.06E-03 | 8.23E-20 | -0.428 |
| cg13544946 | 9  | 35729779  | TLN1     | 5'UTR/1st intron | N_Shelf | 0.439±0.138 | 0.751±0.099 | -0.311 | 1.61E-04 | 6.06E-11 | -0.315 |
| cg24941681 | 20 | 33759921  | PROCR    | 5'UTR/1st exon   | N_Shelf | 0.351±0.146 | 0.662±0.09  | -0.311 | 2.82E-04 | 8.38E-26 | -0.486 |
| cg25287474 | 9  | 14693538  | ZDHHC21  | 1st exon         | Island  | 0.223±0.262 | 0.534±0.196 | -0.311 | 1.23E-02 | 5.95E-06 | -0.221 |
| cg09513380 | 13 | 100622253 | ZIC5     | TSS1500          | Island  | 0.32±0.176  | 0.63±0.099  | -0.310 | 1.18E-03 | 1.40E-14 | -0.367 |
| cg08640923 | 2  | 220117945 | TUBA4A   | 5'UTR/1st intron | Island  | 0.142±0.14  | 0.452±0.305 | -0.309 | 1.67E-03 | 4.11E-29 | -0.514 |
| cg05270634 | 17 | 41177445  | RND2     | 1st exon         | S_Shore | 0.426±0.183 | 0.735±0.153 | -0.308 | 1.40E-03 | 2.58E-20 | -0.434 |
| cg10195295 | 12 | 21809973  | LDHB     | 5'UTR/1st intron | N_Shore | 0.349±0.168 | 0.657±0.119 | -0.308 | 8.03E-04 | 4.04E-27 | -0.497 |
| cg25296938 | 7  | 98976900  | ARPC1B   | 5'UTR/1st intron | S_Shelf | 0.34±0.197  | 0.648±0.143 | -0.308 | 2.42E-03 | 2.53E-14 | -0.364 |
| cg13251484 | 14 | 74180217  | PNMA1    | 1st exon         | N_Shore | 0.28±0.113  | 0.588±0.1   | -0.308 | 2.40E-05 | 3.24E-27 | -0.498 |
| cg27165794 | 14 | 74179674  | PNMA1    | 1st exon         | N_Shore | 0.399±0.135 | 0.707±0.055 | -0.307 | 2.43E-04 | 1.01E-37 | -0.576 |
| cg09043518 | 17 | 80290106  | SECTM1   | 5'UTR/1st intron | N_Shore | 0.516±0.175 | 0.823±0.063 | -0.307 | 1.39E-03 | 6.16E-16 | -0.384 |
| cg24874612 | 17 | 4689765   | VMO1     | TSS200           | S_Shelf | 0.367±0.148 | 0.675±0.072 | -0.307 | 4.06E-04 | 2.60E-05 | -0.206 |
| cg08343042 | 2  | 135476907 | TMEM163  | TSS1500          | Island  | 0.355±0.259 | 0.662±0.185 | -0.307 | 1.22E-02 | 3.31E-06 | -0.227 |
| cg18222083 | 17 | 41364007  | TMEM106A | 5'UTR/1st intron | Island  | 0.396±0.268 | 0.703±0.267 | -0.307 | 1.78E-02 | 4.50E-43 | -0.608 |
| cg08396863 | 2  | 220117599 | TUBA4A   | 5'UTR/1st intron | N_Shore | 0.214±0.114 | 0.521±0.272 | -0.307 | 4.70E-04 | 2.05E-38 | -0.580 |
| cg14302224 | 10 | 105210980 | CALHM2   | 5'UTR/1st exon   | N_Shore | 0.253±0.133 | 0.559±0.207 | -0.306 | 2.04E-04 | 4.31E-07 | -0.246 |
| cg13334650 | 11 | 6440065   | APBB1    | 5'UTR/1st intron | Island  | 0.347±0.168 | 0.652±0.224 | -0.306 | 1.17E-03 | 5.12E-10 | -0.300 |
| cg17260706 | 11 | 118782879 | BCL9L    | TSS1500          | S_Shore | 0.417±0.086 | 0.723±0.055 | -0.306 | 4.39E-06 | 3.37E-19 | -0.422 |
| cg22708738 | 19 | 50316212  | FUZ      | 5'UTR/1st intron | S_Shelf | 0.449±0.171 | 0.755±0.129 | -0.306 | 9.48E-04 | 2.87E-12 | -0.335 |
| cg08377924 | 17 | 41363628  | TMEM106A | TSS1500          | N_Shore | 0.315±0.259 | 0.62±0.243  | -0.305 | 1.47E-02 | 5.23E-42 | -0.602 |
| cg25559421 | 5  | 157003155 | ADAM19   | TSS1500          | S_Shore | 0.337±0.155 | 0.642±0.191 | -0.305 | 5.30E-04 | 2.56E-08 | -0.270 |
| cg19664267 | 6  | 33245163  | B3GALT4  | 5'UTR/1st exon   | Island  | 0.526±0.19  | 0.831±0.05  | -0.304 | 2.53E-03 | 3.37E-68 | -0.724 |
| cg24406344 | 2  | 97167519  | NEURL3   | 5'UTR            | S_Shore | 0.303±0.083 | 0.607±0.109 | -0.304 | 4.20E-07 | 3.85E-06 | -0.225 |
| cg20577019 | 1  | 150123077 | PLEKHO1  | 5'UTR/1st exon   | Island  | 0.424±0.051 | 0.727±0.056 | -0.304 | 9.40E-10 | 8.22E-12 | -0.328 |
| cg13438961 | 1  | 41250071  | KCNQ4    | 1st exon         | Island  | 0.486±0.127 | 0.789±0.076 | -0.303 | 1.27E-04 | 5.99E-07 | -0.243 |
| cg21766592 | 19 | 47288066  | SLC1A5   | 5'UTR/1st exon   | N_Shelf | 0.18±0.087  | 0.483±0.16  | -0.303 | 2.43E-06 | 5.63E-18 | -0.408 |
| cg18054578 | 19 | 47735960  | BBC3     | 5'UTR/1st exon   | S_Shore | 0.102±0.035 | 0.405±0.179 | -0.303 | 1.18E-06 | 9.33E-07 | -0.239 |
| cg06315390 | 22 | 45704914  | FAM118A  | 1st exon         | N_Shore | 0.522±0.146 | 0.825±0.068 | -0.303 | 4.30E-04 | 3.81E-05 | -0.201 |
| cg09874289 | 19 | 17008193  | CPAMD8   | TSS1500          | Island  | 0.159±0.107 | 0.462±0.189 | -0.303 | 3.32E-05 | 3.12E-06 | -0.227 |
| cg24191285 | 17 | 73893206  | TRIM65   | TSS200           | Island  | 0.39±0.14   | 0.692±0.122 | -0.303 | 2.00E-04 | 8.58E-14 | -0.357 |
| cg08135379 | 12 | 47474763  | AMIGO2   | TSS1500          | S_Shore | 0.414±0.174 | 0.715±0.104 | -0.301 | 1.30E-03 | 1.40E-26 | -0.493 |
| cg13848707 | 10 | 70321243  | TET1     | 5'UTR/1st intron | S_Shore | 0.282±0.144 | 0.583±0.223 | -0.301 | 5.26E-04 | 1.95E-09 | -0.290 |
| cg18721397 | 5  | 32584912  | SUB1     | TSS1500          | N_Shore | 0.509±0.213 | 0.809±0.066 | -0.300 | 4.94E-03 | 4.69E-10 | -0.301 |
| cg10633838 | 6  | 33245359  | B3GALT4  | 1st exon         | Island  | 0.429±0.128 | 0.73±0.05   | -0.300 | 2.02E-04 | 1.52E-57 | -0.681 |
| cg27278017 | 20 | 33759645  | PROCR    | TSS200           | N_Shelf | 0.423±0.16  | 0.723±0.056 | -0.300 | 9.42E-04 | 8.36E-31 | -0.527 |
| cg00930615 | 15 | 60690667  | ANXA2    | TSS1500          | N_Shore | 0.31±0.176  | 0.61±0.261  | -0.300 | 2.76E-03 | 6.66E-17 | -0.396 |
| cg03321508 | 20 | 25039707  | ACSS1    | TSS1500          | S_Shore | 0.366±0.116 | 0.665±0.123 | -0.299 | 3.13E-05 | 7.78E-10 | -0.297 |
| cg19256731 | 20 | 1874527   | SIRPA    | TSS1500          | N_Shore | 0.544±0.208 | 0.844±0.061 | -0.299 | 4.46E-03 | 1.54E-11 | -0.324 |
| cg11348442 | 2  | 220117784 | TUBA4A   | 5'UTR/1st intron | N_Shore | 0.186±0.156 | 0.486±0.271 | -0.299 | 1.79E-03 | 1.41E-34 | -0.554 |
| cg06605158 | 20 | 33759940  | PROCR    | 5'UTR/1st exon   | N_Shelf | 0.374±0.154 | 0.672±0.099 | -0.299 | 5.60E-04 | 4.98E-27 | -0.496 |
| cg12798097 | 20 | 44034258  | DBNDD2   | TSS1500          | N_Shore | 0.277±0.101 | 0.575±0.132 | -0.299 | 6.81E-06 | 2.81E-15 | -0.376 |
| cg22902177 | 3  | 129324717 | PLXND1   | 1st exon         | Island  | 0.314±0.241 | 0.612±0.205 | -0.299 | 1.05E-02 | 1.66E-07 | -0.254 |
| cg12773325 | 11 | 2160560   | IGF2     | 5'UTR            | Island  | 0.414±0.24  | 0.713±0.195 | -0.299 | 9.92E-03 | 1.14E-13 | -0.355 |
| cg26598152 | 16 | 69760928  | NQO1     | TSS1500          | S_Shore | 0.182±0.125 | 0.48±0.263  | -0.299 | 6.47E-04 | 4.93E-28 | -0.505 |
| cg08438690 | 3  | 52279403  | PPM1M    | TSS1500          | N_Shore | 0.526±0.129 | 0.825±0.038 | -0.298 | 2.57E-04 | 3.80E-14 | -0.361 |
| cg16336494 | 6  | 151188259 | MTHFD1L  | 1st exon         | S_Shore | 0.457±0.121 | 0.755±0.05  | -0.298 | 1.48E-04 | 2.40E-26 | -0.491 |
| cg00054525 | 16 | 88717587  | CYBA     | TSS200           | N_Shelf | 0.381±0.123 | 0.679±0.055 | -0.298 | 1.53E-04 | 1.07E-38 | -0.582 |
| cg07003632 | 14 | 100259329 | EML1     | TSS1500          | Island  | 0.253±0.121 | 0.55±0.204  | -0.298 | 1.37E-04 | 1.37E-07 | -0.256 |
| cg06461306 | 7  | 767490    | PRKAR1B  | TSS1500          | S_Shore | 0.313±0.163 | 0.61±0.205  |        |          |          |        |

|            |    |           |          |                  |         |             |             |        |          |          |        |
|------------|----|-----------|----------|------------------|---------|-------------|-------------|--------|----------|----------|--------|
| cg25587662 | 18 | 10525447  | NAPG     | TSS1500          | N_Shore | 0.492±0.148 | 0.789±0.077 | -0.297 | 5.13E-04 | 3.59E-16 | -0.387 |
| cg20276750 | 3  | 52279555  | PPM1M    | TSS1500          | N_Shore | 0.327±0.186 | 0.624±0.113 | -0.297 | 2.14E-03 | 6.21E-27 | -0.496 |
| cg03786933 | 16 | 69760418  | NQO1     | 5'UTR/1st exon   | Island  | 0.262±0.205 | 0.558±0.268 | -0.297 | 6.48E-03 | 9.79E-16 | -0.382 |
| cg09137630 | 19 | 47618017  | ZC3H4    | TSS1500          | S_Shelf | 0.37±0.14   | 0.666±0.092 | -0.297 | 2.94E-04 | 2.24E-06 | -0.231 |
| cg07839457 | 16 | 57023022  | NLR5     | TSS1500          | N_Shore | 0.302±0.166 | 0.599±0.183 | -0.297 | 1.02E-03 | 2.93E-35 | -0.559 |
| cg27176870 | 19 | 38754930  | SPINT2   | TSS200           | Island  | 0.308±0.19  | 0.604±0.118 | -0.296 | 2.52E-03 | 7.87E-24 | -0.468 |
| cg10708675 | 16 | 69760758  | NQO1     | TSS1500          | S_Shore | 0.232±0.163 | 0.529±0.275 | -0.296 | 2.53E-03 | 7.45E-29 | -0.512 |
| cg02467765 | 4  | 78978708  | FRAS1    | TSS200           | N_Shore | 0.201±0.136 | 0.497±0.235 | -0.296 | 5.62E-04 | 6.94E-09 | -0.280 |
| cg06933574 | 5  | 134370282 | PITX1    | TSS1500          | S_Shelf | 0.254±0.245 | 0.549±0.228 | -0.296 | 1.27E-02 | 1.10E-07 | -0.258 |
| cg19764436 | 22 | 23413260  | GNAZ     | 5'UTR/1st intron | Island  | 0.237±0.096 | 0.533±0.156 | -0.296 | 7.41E-06 | 1.65E-23 | -0.465 |
| cg19074496 | 2  | 220117868 | TUBA4A   | 5'UTR/1st intron | N_Shore | 0.117±0.094 | 0.413±0.288 | -0.296 | 6.96E-04 | 3.86E-30 | -0.522 |
| cg20923245 | 12 | 104697419 | EID3     | TSS200           | Island  | 0.295±0.159 | 0.59±0.211  | -0.295 | 1.01E-03 | 9.12E-14 | -0.356 |
| cg15768226 | 20 | 55965245  | RBM38    | TSS1500          | S_Shore | 0.5±0.205   | 0.795±0.056 | -0.295 | 4.51E-03 | 3.61E-14 | -0.362 |
| cg19548479 | 17 | 41363737  | TMEM106A | TSS200           | Island  | 0.332±0.248 | 0.627±0.238 | -0.295 | 1.40E-02 | 2.46E-43 | -0.610 |
| cg18696027 | 15 | 45002597  | B2M      | TSS1500          | N_Shore | 0.509±0.226 | 0.804±0.101 | -0.295 | 7.22E-03 | 8.20E-24 | -0.468 |
| cg24049348 | 8  | 17433926  | PDGFRL   | TSS200           | N_Shore | 0.283±0.163 | 0.577±0.254 | -0.295 | 2.00E-03 | 7.09E-12 | -0.329 |
| cg02448597 | 6  | 32160605  | GPSM3    | 5'UTR            | N_Shelf | 0.476±0.116 | 0.77±0.045  | -0.294 | 1.19E-04 | 4.48E-49 | -0.641 |
| cg00157962 | 1  | 109102212 | FAM102B  | TSS1500          | N_Shore | 0.469±0.115 | 0.763±0.096 | -0.294 | 4.70E-05 | 1.30E-13 | -0.354 |
| cg18087943 | 11 | 2160540   | IGF2     | 5'UTR            | Island  | 0.407±0.237 | 0.701±0.208 | -0.294 | 1.04E-02 | 4.01E-17 | -0.398 |
| cg18486258 | 6  | 42110750  | C6orf132 | TSS200           | S_Shore | 0.367±0.153 | 0.661±0.144 | -0.294 | 5.18E-04 | 1.05E-17 | -0.405 |
| cg17441401 | 1  | 53794150  | LRP8     | TSS1500          | S_Shore | 0.303±0.172 | 0.596±0.209 | -0.294 | 1.68E-03 | 5.91E-12 | -0.330 |
| cg11854806 | 10 | 82116365  | DYDC1    | 5'UTR/1st intron | Island  | 0.393±0.118 | 0.686±0.172 | -0.293 | 6.85E-05 | 8.91E-12 | -0.328 |
| cg17510056 | 20 | 8112972   | PLCB1    | 5'UTR/1st exon   | Island  | 0.1±0.212   | 0.393±0.32  | -0.293 | 1.23E-02 | 3.59E-08 | -0.267 |
| cg07611334 | 20 | 327811    | NRSN2    | 5'UTR/1st intron | Island  | 0.216±0.144 | 0.509±0.197 | -0.293 | 4.67E-04 | 1.43E-27 | -0.501 |
| cg01186777 | 19 | 6531016   | TNFSF9   | 5'UTR/1st exon   | Island  | 0.196±0.168 | 0.488±0.244 | -0.292 | 2.20E-03 | 1.30E-08 | -0.276 |
| cg18055007 | 6  | 31698226  | DDAH2    | TSS1500          | Island  | 0.501±0.192 | 0.792±0.054 | -0.292 | 3.39E-03 | 1.58E-18 | -0.414 |
| cg00630164 | 1  | 41250062  | KCNQ4    | 1st exon         | Island  | 0.561±0.13  | 0.853±0.06  | -0.292 | 2.52E-04 | 6.70E-08 | -0.349 |
| cg03817911 | 12 | 104697389 | EID3     | TSS200           | Island  | 0.31±0.195  | 0.602±0.251 | -0.292 | 5.00E-03 | 2.84E-13 | -0.349 |
| cg27098900 | 6  | 33245128  | B3GALT4  | 5'UTR/1st exon   | Island  | 0.463±0.211 | 0.754±0.059 | -0.291 | 5.54E-03 | 3.38E-63 | -0.705 |
| cg10572943 | 21 | 34775045  | IFNGR2   | TSS200           | N_Shore | 0.482±0.093 | 0.774±0.054 | -0.291 | 1.49E-05 | 2.28E-16 | -0.389 |
| cg23320056 | 1  | 155948742 | ARHGFE2  | 5'UTR/1st exon   | S_Shore | 0.339±0.167 | 0.63±0.158  | -0.291 | 1.12E-03 | 7.96E-64 | -0.708 |
| cg00820919 | 2  | 43863839  | PLEKHH2  | TSS1500          | N_Shore | 0.337±0.148 | 0.628±0.133 | -0.291 | 4.23E-04 | 7.58E-09 | -0.280 |
| cg07156249 | 6  | 32822911  | TAP1     | TSS1500          | S_Shore | 0.24±0.169  | 0.53±0.193  | -0.290 | 1.48E-03 | 2.50E-18 | -0.412 |
| cg00124375 | 6  | 31698218  | DDAH2    | TSS1500          | Island  | 0.418±0.194 | 0.708±0.066 | -0.290 | 3.59E-03 | 2.46E-15 | -0.377 |
| cg26365553 | 11 | 47290613  | MADD     | TSS1500          | N_Shore | 0.239±0.145 | 0.528±0.209 | -0.290 | 6.16E-04 | 5.70E-10 | -0.299 |
| cg26876834 | 16 | 2013573   | SNHG9    | TSS1500          | N_Shore | 0.489±0.217 | 0.779±0.236 | -0.290 | 8.17E-03 | 2.18E-06 | -0.231 |
| cg02226939 | 17 | 28619481  | BLMH     | TSS1500          | S_Shore | 0.252±0.157 | 0.541±0.167 | -0.289 | 7.47E-04 | 3.73E-10 | -0.302 |
| cg10864952 | 7  | 65671987  | TPST1    | 5'UTR/1st intron | S_Shore | 0.33±0.102  | 0.62±0.182  | -0.289 | 3.25E-05 | 5.74E-26 | -0.487 |
| cg25277632 | 10 | 14995476  | DCLRE1C  | 5'UTR/1st intron | N_Shore | 0.205±0.165 | 0.494±0.238 | -0.289 | 2.00E-03 | 8.14E-41 | -0.595 |
| cg26251270 | 1  | 53067832  | GPX7     | TSS1500          | N_Shore | 0.211±0.091 | 0.5±0.171   | -0.289 | 1.08E-05 | 8.36E-44 | -0.613 |
| cg13365340 | 6  | 33245342  | B3GALT4  | 1st exon         | Island  | 0.457±0.163 | 0.746±0.055 | -0.289 | 1.33E-03 | 1.19E-64 | -0.711 |
| cg27297851 | 19 | 36389833  | NFKBID   | 5'UTR/1st intron | N_Shore | 0.443±0.161 | 0.732±0.107 | -0.289 | 9.76E-04 | 1.85E-19 | -0.425 |
| cg24497361 | 11 | 3858493   | RHOA     | 5'UTR/1st intron | N_Shelf | 0.458±0.141 | 0.747±0.062 | -0.289 | 4.81E-04 | 5.97E-17 | -0.396 |
| cg20715295 | 19 | 42807159  | PAFAH1B3 | TSS1500          | N_Shelf | 0.446±0.076 | 0.734±0.085 | -0.288 | 3.42E-07 | 3.05E-06 | -0.228 |
| cg06767766 | 10 | 70321383  | TET1     | 5'UTR/1st intron | S_Shore | 0.332±0.169 | 0.62±0.21   | -0.288 | 1.77E-03 | 1.87E-10 | -0.307 |
| cg22797644 | 6  | 34206491  | HMGAI1   | 5'UTR            | S_Shore | 0.456±0.105 | 0.744±0.108 | -0.288 | 1.71E-05 | 6.31E-28 | -0.504 |
| cg23624705 | 1  | 92952655  | GF11     | TSS1500          | S_Shore | 0.443±0.137 | 0.73±0.128  | -0.288 | 2.50E-04 | 6.92E-15 | -0.371 |
| cg17215278 | 1  | 117114263 | CD58     | TSS1500          | S_Shore | 0.493±0.187 | 0.781±0.09  | -0.288 | 2.90E-03 | 3.40E-05 | -0.203 |
| cg26357885 | 14 | 65006204  | HSPA2    | TSS1500          | N_Shore | 0.294±0.121 | 0.581±0.17  | -0.287 | 1.01E-04 | 2.16E-07 | -0.252 |
| cg24000908 | 5  | 1113358   | SLC12A7  | TSS1500          | S_Shore | 0.45±0.117  | 0.737±0.113 | -0.287 | 5.79E-05 | 3.54E-08 | -0.267 |
| cg00859858 | 1  | 37944257  | ZC3H12A  | 5'UTR            | S_Shelf | 0.279±0.118 | 0.566±0.223 | -0.287 | 2.88E-04 | 9.90E-10 | -0.295 |
| cg25387487 | 5  | 157003181 | ADAM19   | TSS1500          | S_Shore | 0.302±0.16  | 0.588±0.208 | -0.287 | 1.27E-03 | 1.23E-09 | -0.294 |
| cg05106294 | 11 | 12031097  | DDK3     | TSS1500          | S_Shore | 0.414±0.191 | 0.701±0.13  | -0.287 | 3.14E-03 | 9.41E-09 | -0.278 |
| cg19268695 | 1  | 117143411 | DENND2D  | TSS200           | N_Shelf | 0.39±0.126  | 0.676±0.134 | -0.286 | 1.19E-04 | 3.15E-30 | -0.522 |
| cg25207447 | 6  | 43043831  | PTK7     | TSS1500          | N_Shore | 0.371±0.13  | 0.658±0.124 | -0.286 | 1.52E-04 | 3.99E-18 | -0.410 |
| cg02183671 | 4  | 15779999  | CD38     | 1st exon         | Island  | 0.388±0.204 | 0.674±0.166 | -0.286 | 4.83E-03 | 1.34E-11 | -0.325 |
| cg07461772 | 16 | 68482809  | SMPD3    | TSS1500          | Island  | 0.356±0.205 | 0.642±0.165 | -0.286 | 5.10E-03 | 4.04E-06 | -0.225 |
| cg18996663 | 14 | 55595768  | LGALS3   | TSS200           | Island  | 0.219±0.181 | 0.505±0.189 | -0.286 | 2.55E-03 | 8.21E-18 | -0.406 |
| cg08986368 | 11 | 2159122   | IGF2     | 5'UTR            | Island  | 0.415±0.157 | 0.7±0.107   | -0.285 | 8.80E-04 | 4.04E-26 | -0.489 |
| cg06641285 | 17 | 76921829  | TIMP2    | TSS1500          | Island  | 0.365±0.188 | 0.65±0.225  | -0.285 | 4.07E-03 | 1.49E-08 | -0.274 |
| cg04643969 | 11 | 63753210  | OTUB1    | TSS200           | N_Shore | 0.361±0.096 | 0.645±0.16  | -0.284 | 1.36E-05 | 6.33E-10 | -0.298 |
| cg10025300 | 2  | 135476909 | TMEM163  | TSS1500          | Island  | 0.301±0.172 | 0.585±0.176 | -0.284 | 1.76E-03 | 3.81E-05 | -0.201 |
| cg11856711 | 12 | 54785309  | ZNF385A  | TSS1500          | S_Shore | 0.368±0.143 | 0.652±0.104 | -0.284 | 4.19E-04 | 6.34E-08 | -0.263 |
| cg25424659 | 19 | 11450592  | RAB3D    | TSS1500          | S_Shore | 0.424±0.048 | 0.708±0.073 | -0.284 | 2.27E-10 | 1.10E-26 | -0.494 |
| cg17300736 | 11 | 2162475   | IGF2     | 5'UTR            | Island  | 0.468±0.109 | 0.752±0.154 | -0.284 | 3.75E-05 | 1.01E-09 | -0.295 |
| cg01520924 | 14 | 65006170  | HSPA2    | TSS1500          | N_Shore | 0.268±0.12  | 0.552±0.181 | -0.284 | 1.36E-04 | 1.50E-05 | -0.211 |
| cg08341874 | 17 | 4689655   | VMO1     | 5'UTR/1st exon   | S_Shelf | 0.378±0.146 | 0.662±0.071 | -0.284 | 6.56E-04 | 1.41E-05 | -0.212 |
| cg10169539 | 14 | 51296612  | NIN      | 5'UTR            | N_Shore | 0.15±0.063  | 0.433±0.224 | -0.284 | 6.04E-05 | 2.79E-08 | -0.269 |
| cg27657537 | 22 | 20863762  | MED15    | 5'UTR/1st intron | S_Shore | 0.249±0.073 | 0.532±0.16  | -0.283 | 2.17E-06 | 3.24E-20 | -0.433 |
| cg06638433 | 17 | 47075175  | IGF2BP1  | 1st exon         | Island  | 0.352±0.138 | 0.635±0.144 | -0.283 | 3.05E-04 | 1.22E-15 | -0.380 |
| cg15087147 | 7  | 127672169 | LRRC4    | TSS1500          | Island  | 0.377±0.109 | 0.66±0.086  | -0.283 | 4.33E-05 | 2.52E-10 | -0.305 |
| cg10162691 | 17 | 41177409  | RND2     | 1st exon         | S_Shore | 0.443±0.177 | 0.725±0.153 | -0.282 | 2.15E-03 | 1.35E-21 | -0.447 |
| cg11537406 | 11 | 124932624 | SLC37A2  | TSS1500          | N_Shore | 0.479±0.229 | 0.76±0.117  | -0.282 | 9.93E-03 | 8.92E-06 | -0.217 |
| cg26392828 | 14 | 61191075  | SIX4     | TSS1500          | S_Shore | 0.1±0.115   | 0.381±0.269 | -0.281 | 1.02E-03 | 4.94E-07 | -0.245 |
| cg26607748 | 9  | 35690226  | TPM2     | TSS200           | Island  | 0.421±0.069 | 0.702±0.077 | -0.281 | 1.52E-07 | 2.38E-15 | -0.377 |
| cg22212414 | 21 | 34775032  | IFNGR2   | TSS200           | N_Shore | 0.544±0.112 | 0.825±0.053 | -0.281 | 1.14E-04 | 2.19E-15 | -0.377 |
| cg08662017 | 11 | 12031093  | DDK3     | TSS1500          | S_Shore | 0.373±0.137 | 0.653±0.148 | -0.281 | 2.99E-04 | 7.51E-10 | -0.297 |
| cg07730848 | 5  | 6379108   | MED10    | TSS1500          | S_Shore | 0.451±0.183 | 0.732±0.122 | -0.281 | 2.70E-03 | 1.14E-05 | -0.214 |
| cg08148261 | 12 | 21810960  | LDHB     | TSS1500          | S_Shore | 0.428±0.139 | 0.708±0.073 | -0.280 | 4.85E-04 | 4.30E-27 | -0.497 |
| cg23681213 | 14 | 74180391  | PNMA1    | 5'UTR/1st exon   | N_Shore | 0.171±0.123 | 0.451±0.173 | -0.280 | 1.70E-04 | 3.52E-30 | -0.522 |
| cg02245612 | 19 | 5293611   | PTPRS    | 5'UTR/1st intron | S_Shelf | 0.173±0.146 | 0.453±0.244 | -0.280 | 1.56E-03 | 7.43E-11 | -0.314 |
| cg16996144 | 1  | 67217950  | TCTEX1D1 | TSS200           | N_Shore | 0.383±0.197 | 0.663±0.096 | -0.279 | 4.58E-03 | 2.14E-09 | -0.289 |
| cg05973866 | 6  | 33244715  | B3GALT4  | TSS1500          | Island  | 0.162±0.096 | 0.441±0.14  | -0.279 | 1.10E-05 | 3.07E-27 | -0.498 |
| cg27522060 | 15 | 65360366  | RASL12   | 5'UTR/1st exon   | Island  | 0.336±0.053 | 0.615±0.159 | -0.279 | 8.70E-07 | 3.89E-07 | -0.247 |
| cg25849281 | 1  | 8937077   | ENO1     | 5'UTR/1st intron | N_Shore | 0.352±0.155 | 0.631±0.158 | -0.278 | 9.35E-04 | 7.83E-33 | -0.542 |
| cg08218101 | 4  | 15704393  | BST1     | TSS200           | N_Shore | 0.356±0.14  | 0.634±0.181 | -0.278 | 5.03E-04 | 6.49E-30 | -0.520 |
| cg18503260 | 8  | 86157410  | CA13     | TSS1500          | N_Shore | 0.306±0.189 | 0.584±0.171 | -0.278 | 3.81E-03 | 1.57E-05 | -0.211 |

|            |    |           |           |                  |         |             |             |        |          |          |        |
|------------|----|-----------|-----------|------------------|---------|-------------|-------------|--------|----------|----------|--------|
| cg08378442 | 2  | 220117704 | TUBA4A    | 5'UTR/1st intron | N_Shore | 0.134±0.089 | 0.412±0.263 | -0.278 | 5.71E-04 | 4.71E-33 | -0.544 |
| cg18670767 | 22 | 45706726  | FAM118A   | 5'UTR            | S_Shore | 0.267±0.114 | 0.544±0.17  | -0.277 | 9.09E-05 | 1.10E-12 | -0.341 |
| cg26418880 | 12 | 56123972  | CD63      | TSS1500          | S_Shore | 0.44±0.164  | 0.717±0.064 | -0.277 | 1.73E-03 | 3.74E-08 | -0.267 |
| cg02589695 | 1  | 206730999 | RASSF5    | 1st exon         | S_Shore | 0.414±0.134 | 0.691±0.095 | -0.277 | 3.19E-04 | 4.05E-05 | -0.201 |
| cg02774862 | 10 | 70321580  | TET1      | 5'UTR/1st intron | S_Shore | 0.381±0.169 | 0.658±0.197 | -0.277 | 2.14E-03 | 2.62E-08 | -0.270 |
| cg14608156 | 11 | 2160554   | IGF2      | 5'UTR            | Island  | 0.424±0.245 | 0.701±0.197 | -0.277 | 1.67E-02 | 6.11E-15 | -0.372 |
| cg26569469 | 1  | 110753895 | KCNC4     | 1st exon         | Island  | 0.168±0.113 | 0.444±0.246 | -0.277 | 6.34E-04 | 1.27E-05 | -0.213 |
| cg17372806 | 11 | 63448356  | RTN3      | TSS1500          | N_Shore | 0.467±0.099 | 0.744±0.087 | -0.276 | 1.78E-05 | 3.81E-09 | -0.285 |
| cg15274684 | 21 | 48054897  | PRMT2     | TSS1500          | N_Shore | 0.219±0.112 | 0.496±0.25  | -0.276 | 6.98E-04 | 2.07E-06 | -0.231 |
| cg19731268 | 10 | 73724697  | CHST3     | 5'UTR/1st intron | Island  | 0.238±0.106 | 0.515±0.207 | -0.276 | 1.61E-04 | 1.66E-06 | -0.233 |
| cg23305567 | 19 | 54369576  | MYADM     | 5'UTR/1st exon   | N_Shelf | 0.481±0.13  | 0.757±0.07  | -0.276 | 3.31E-04 | 4.05E-11 | -0.318 |
| cg26806924 | 20 | 33760017  | PROCR     | 1st exon         | N_Shelf | 0.324±0.128 | 0.6±0.108   | -0.276 | 2.07E-04 | 6.27E-24 | -0.469 |
| cg09350274 | 5  | 137610396 | GFRA3     | TSS200           | S_Shore | 0.5±0.145   | 0.776±0.061 | -0.276 | 8.19E-04 | 2.24E-18 | -0.413 |
| cg09507934 | 7  | 102072549 | ORAI2     | TSS1500          | N_Shore | 0.536±0.125 | 0.812±0.047 | -0.276 | 3.21E-04 | 3.10E-11 | -0.320 |
| cg21837069 | 1  | 1369466   | VWA1      | TSS1500          | N_Shore | 0.463±0.094 | 0.739±0.044 | -0.275 | 3.53E-05 | 1.80E-16 | -0.391 |
| cg07435294 | 11 | 65554356  | OVOL1     | TSS200           | Island  | 0.226±0.157 | 0.502±0.223 | -0.275 | 1.90E-03 | 2.14E-05 | -0.208 |
| cg03524572 | 20 | 62284488  | STMN3     | TSS1500          | Island  | 0.427±0.256 | 0.702±0.192 | -0.275 | 2.03E-02 | 4.20E-09 | -0.284 |
| cg11257888 | 1  | 24828096  | RCAN3     | TSS1500          | N_Shore | 0.549±0.1   | 0.824±0.079 | -0.275 | 2.47E-05 | 1.74E-06 | -0.233 |
| cg25666919 | 7  | 102074615 | ORAI2     | 5'UTR/1st intron | S_Shore | 0.367±0.061 | 0.642±0.102 | -0.275 | 2.44E-08 | 2.46E-30 | -0.523 |
| cg06421614 | 17 | 7121116   | DLG4      | TSS200           | S_Shelf | 0.324±0.092 | 0.599±0.125 | -0.275 | 6.67E-06 | 1.36E-16 | -0.392 |
| cg04868764 | 15 | 41137019  | SPINT1    | 1st exon         | Island  | 0.275±0.157 | 0.55±0.165  | -0.274 | 1.19E-03 | 1.53E-20 | -0.436 |
| cg09516362 | 16 | 69760459  | NQO1      | 5'UTR/1st exon   | Island  | 0.138±0.129 | 0.412±0.243 | -0.274 | 1.05E-03 | 1.82E-14 | -0.366 |
| cg06228542 | 12 | 56123961  | CD63      | TSS1500          | S_Shore | 0.5±0.178   | 0.774±0.059 | -0.274 | 3.08E-03 | 2.53E-07 | -0.251 |
| cg17483510 | 3  | 179168677 | GNB4      | 5'UTR/1st intron | N_Shore | 0.456±0.135 | 0.73±0.103  | -0.273 | 3.72E-04 | 4.03E-31 | -0.529 |
| cg15510249 | 3  | 182970850 | B3GNT5    | TSS200           | N_Shore | 0.211±0.146 | 0.484±0.269 | -0.273 | 2.83E-03 | 5.89E-18 | -0.408 |
| cg19457477 | 19 | 39108609  | MAP4K1    | 5'UTR/1st exon   | N_Shore | 0.473±0.168 | 0.746±0.097 | -0.273 | 1.93E-03 | 5.25E-18 | -0.409 |
| cg09238801 | 14 | 74179101  | PNMA1     | 1st exon/3'UTR   | N_Shore | 0.451±0.131 | 0.725±0.06  | -0.273 | 4.10E-04 | 1.30E-36 | -0.568 |
| cg25364343 | 18 | 21719286  | CABYR     | 5'UTR/1st intron | Island  | 0.338±0.226 | 0.61±0.27   | -0.272 | 1.70E-02 | 8.42E-06 | -0.217 |
| cg11864490 | 20 | 33759605  | PROCR     | TSS200           | N_Shelf | 0.357±0.155 | 0.63±0.098  | -0.272 | 1.13E-03 | 1.27E-18 | -0.415 |
| cg20388732 | 17 | 40439433  | STAT5A    | TSS1500          | N_Shore | 0.481±0.055 | 0.754±0.077 | -0.272 | 4.68E-09 | 2.01E-30 | -0.524 |
| cg11036831 | 10 | 82116382  | DYDC1     | 5'UTR/1st intron | Island  | 0.349±0.089 | 0.621±0.149 | -0.272 | 8.53E-06 | 2.21E-11 | -0.322 |
| cg21663122 | 6  | 26250936  | HIST1H2BH | TSS1500          | S_Shelf | 0.446±0.141 | 0.717±0.153 | -0.272 | 5.36E-04 | 1.24E-05 | -0.213 |
| cg03204605 | 4  | 7941837   | AFAP1     | TSS200           | Island  | 0.318±0.201 | 0.59±0.258  | -0.271 | 9.76E-03 | 1.02E-18 | -0.416 |
| cg24674635 | 20 | 6750696   | BMP2      | 5'UTR/1st intron | S_Shore | 0.27±0.109  | 0.542±0.187 | -0.271 | 1.29E-04 | 1.07E-09 | -0.295 |
| cg16890093 | 6  | 32813084  | PSMB8     | TSS1500          | S_Shore | 0.504±0.15  | 0.775±0.09  | -0.271 | 9.52E-04 | 1.81E-21 | -0.445 |
| cg04524477 | 17 | 41363597  | TMEM106A  | TSS1500          | N_Shore | 0.307±0.223 | 0.578±0.25  | -0.271 | 1.48E-02 | 4.55E-38 | -0.578 |
| cg17936488 | 9  | 134151519 | FAM78A    | 1st exon         | N_Shore | 0.469±0.145 | 0.74±0.065  | -0.271 | 8.74E-04 | 1.04E-35 | -0.562 |
| cg02914427 | 16 | 29674184  | SPN       | TSS1500          | N_Shore | 0.543±0.13  | 0.814±0.043 | -0.271 | 4.98E-04 | 2.49E-45 | -0.621 |
| cg09332655 | 6  | 43044537  | PTK7      | TSS200           | Island  | 0.412±0.173 | 0.682±0.059 | -0.270 | 2.83E-03 | 3.71E-34 | -0.551 |
| cg08619932 | 19 | 49200058  | FUT2      | 5'UTR/1st intron | Island  | 0.145±0.128 | 0.414±0.231 | -0.270 | 9.44E-04 | 1.46E-07 | -0.255 |
| cg24110050 | 1  | 67217853  | TCTEX1D1  | TSS1500          | N_Shore | 0.38±0.211  | 0.649±0.154 | -0.270 | 8.33E-03 | 6.14E-12 | -0.330 |
| cg20721738 | 22 | 23487104  | RAB36     | TSS1500          | N_Shore | 0.378±0.163 | 0.648±0.11  | -0.269 | 1.65E-03 | 1.70E-07 | -0.254 |
| cg09735908 | 16 | 88770558  | RNF166    | TSS1500          | N_Shore | 0.53±0.144  | 0.799±0.053 | -0.269 | 9.61E-04 | 5.38E-09 | -0.282 |
| cg21872037 | 17 | 6617470   | SLC13A5   | TSS1500          | Island  | 0.453±0.114 | 0.722±0.072 | -0.269 | 1.25E-04 | 9.43E-06 | -0.216 |
| cg08589721 | 1  | 1370722   | VWA1      | TSS200           | N_Shelf | 0.247±0.097 | 0.516±0.23  | -0.269 | 3.21E-04 | 5.39E-06 | -0.222 |
| cg06230736 | 10 | 8096650   | GATA3     | TSS200           | N_Shelf | 0.423±0.156 | 0.691±0.14  | -0.269 | 1.24E-03 | 6.88E-06 | -0.220 |
| cg03049782 | 17 | 41363891  | TMEM106A  | 5'UTR/1st exon   | Island  | 0.317±0.208 | 0.586±0.213 | -0.269 | 9.27E-03 | 3.30E-43 | -0.609 |
| cg09431416 | 17 | 75137873  | SEC14L1   | 5'UTR            | S_Shore | 0.349±0.168 | 0.617±0.17  | -0.268 | 2.30E-03 | 3.49E-16 | -0.387 |
| cg15229275 | 19 | 46800054  | HIF3A     | TSS1500          | Island  | 0.324±0.131 | 0.591±0.201 | -0.268 | 6.26E-04 | 1.68E-06 | -0.233 |
| cg08864105 | 1  | 111743020 | DENND2D   | 1st exon         | N_Shelf | 0.541±0.101 | 0.808±0.083 | -0.268 | 3.07E-05 | 3.44E-28 | -0.506 |
| cg10740054 | 19 | 18548004  | ISYNA1    | 5'UTR/1st exon   | Island  | 0.185±0.133 | 0.452±0.234 | -0.267 | 1.25E-03 | 3.82E-08 | -0.267 |
| cg08857729 | 1  | 67217826  | TCTEX1D1  | TSS1500          | N_Shore | 0.455±0.207 | 0.722±0.077 | -0.267 | 7.83E-03 | 1.11E-12 | -0.341 |
| cg00919591 | 22 | 23524136  | BCR       | 1st exon         | Island  | 0.448±0.075 | 0.715±0.081 | -0.267 | 8.32E-07 | 3.42E-09 | -0.286 |
| cg14695804 | 20 | 25039210  | ACSS1     | TSS1500          | Island  | 0.141±0.118 | 0.408±0.226 | -0.267 | 6.43E-04 | 1.14E-07 | -0.258 |
| cg26351104 | 1  | 51796558  | TTC39A    | TSS1500          | Island  | 0.155±0.097 | 0.422±0.215 | -0.267 | 2.08E-04 | 1.67E-14 | -0.366 |
| cg17090968 | 12 | 46663694  | SLC38A1   | TSS1500          | S_Shore | 0.52±0.197  | 0.787±0.11  | -0.267 | 5.92E-03 | 3.74E-25 | -0.480 |
| cg13484546 | 1  | 16084939  | FLBIM1    | 5'UTR            | N_Shore | 0.295±0.169 | 0.562±0.234 | -0.266 | 4.02E-03 | 1.77E-09 | -0.291 |
| cg17655614 | 16 | 68770944  | CDH1      | TSS1500          | N_Shore | 0.383±0.126 | 0.649±0.133 | -0.266 | 2.21E-04 | 4.09E-09 | -0.285 |
| cg15991309 | 17 | 80291688  | SECTM1    | 5'UTR/1st exon   | Island  | 0.4±0.162   | 0.666±0.178 | -0.266 | 1.95E-03 | 5.17E-06 | -0.222 |
| cg02739870 | 5  | 1113320   | SLC12A7   | TSS1500          | S_Shore | 0.445±0.125 | 0.712±0.147 | -0.266 | 2.24E-04 | 6.65E-08 | -0.262 |
| cg03721195 | 5  | 137610448 | GFRA3     | TSS200           | S_Shore | 0.4±0.121   | 0.666±0.071 | -0.266 | 2.43E-04 | 2.90E-08 | -0.269 |
| cg09975039 | 9  | 132082957 | C9orf106  | TSS1500          | Island  | 0.12±0.076  | 0.386±0.295 | -0.266 | 1.80E-03 | 3.19E-15 | -0.375 |
| cg27176614 | 16 | 88717989  | CYBA      | TSS1500          | N_Shelf | 0.306±0.069 | 0.572±0.151 | -0.266 | 2.37E-06 | 3.19E-27 | -0.498 |
| cg10983208 | 10 | 73848320  | SPOCK2    | 5'UTR            | S_Shore | 0.288±0.122 | 0.553±0.194 | -0.266 | 3.75E-04 | 2.88E-07 | -0.250 |
| cg04111789 | 6  | 41908262  | CCND3     | 5'UTR            | N_Shore | 0.55±0.13   | 0.816±0.064 | -0.265 | 4.49E-04 | 5.57E-18 | -0.408 |
| cg22975671 | 17 | 6926269   | BCL6B     | TSS200           | Island  | 0.304±0.108 | 0.569±0.125 | -0.265 | 5.31E-05 | 4.01E-08 | -0.266 |
| cg00702126 | 1  | 1369793   | VWA1      | TSS1500          | N_Shore | 0.458±0.105 | 0.724±0.057 | -0.265 | 9.53E-05 | 4.46E-16 | -0.386 |
| cg10633601 | 1  | 47696701  | TAL1      | 5'UTR            | Island  | 0.375±0.184 | 0.64±0.174  | -0.265 | 4.32E-03 | 1.28E-07 | -0.257 |
| cg17589633 | 1  | 203595283 | ATP2B4    | TSS1500          | N_Shelf | 0.294±0.185 | 0.559±0.171 | -0.265 | 4.51E-03 | 2.05E-11 | -0.322 |
| cg23258881 | 1  | 150123037 | PLEKHO1   | 5'UTR/1st exon   | Island  | 0.408±0.041 | 0.673±0.081 | -0.265 | 8.80E-11 | 3.51E-10 | -0.303 |
| cg26078793 | 14 | 65006222  | HSPA2     | TSS1500          | N_Shore | 0.239±0.11  | 0.503±0.179 | -0.265 | 1.49E-04 | 7.48E-07 | -0.241 |
| cg22557662 | 19 | 38747374  | PPP1R14A  | TSS200           | Island  | 0.426±0.135 | 0.691±0.105 | -0.264 | 4.53E-04 | 4.97E-07 | -0.245 |
| cg12630147 | 10 | 70321574  | TET1      | 5'UTR/1st intron | S_Shore | 0.386±0.176 | 0.65±0.204  | -0.264 | 4.09E-03 | 5.06E-10 | -0.300 |
| cg27173151 | 1  | 203598330 | ATP2B4    | 5'UTR/1st intron | N_Shore | 0.438±0.103 | 0.703±0.065 | -0.264 | 6.55E-05 | 2.37E-11 | -0.321 |
| cg12005186 | 11 | 63973952  | FERMT3    | TSS200           | N_Shore | 0.444±0.1   | 0.708±0.064 | -0.264 | 5.24E-05 | 5.41E-37 | -0.571 |
| cg21138405 | 5  | 131827807 | IRF1      | TSS1500          | S_Shore | 0.528±0.136 | 0.792±0.051 | -0.264 | 7.26E-04 | 1.98E-18 | -0.413 |
| cg21620540 | 11 | 12031314  | DKK3      | TSS1500          | S_Shore | 0.454±0.093 | 0.718±0.128 | -0.264 | 1.17E-05 | 4.53E-11 | -0.317 |
| cg05384271 | 19 | 6464029   | CRB3      | 5'UTR/1st exon   | S_Shelf | 0.521±0.174 | 0.785±0.047 | -0.264 | 3.41E-03 | 3.75E-06 | -0.226 |
| cg26325723 | 20 | 25039792  | ACSS1     | TSS1500          | S_Shore | 0.389±0.148 | 0.653±0.131 | -0.264 | 9.53E-04 | 2.65E-08 | -0.270 |
| cg23108728 | 2  | 220117875 | TUBA4A    | 5'UTR/1st intron | N_Shore | 0.125±0.085 | 0.389±0.247 | -0.264 | 5.25E-04 | 2.06E-22 | -0.455 |
| cg22079161 | 4  | 7940579   | AFAP1     | 5'UTR/1st intron | Island  | 0.426±0.167 | 0.689±0.11  | -0.264 | 2.28E-03 | 6.02E-16 | -0.384 |
| cg15565032 | 15 | 68871412  | CORO2B    | 5'UTR            | Island  | 0.392±0.192 | 0.655±0.17  | -0.263 | 5.79E-03 | 2.10E-05 | -0.208 |
| cg27391934 | 1  | 1369948   | VWA1      | TSS1500          | N_Shore | 0.483±0.078 | 0.746±0.064 | -0.263 | 3.08E-06 | 7.79E-14 | -0.357 |
| cg26421140 | 14 | 65006053  | HSPA2     | TSS1500          | N_Shore | 0.439±0.15  | 0.701±0.152 | -0.263 | 1.14E-03 | 1.86E-05 | -0.209 |
| cg07740579 | 17 | 76124173  | TMC6      | 5'UTR/1st intron | N_Shelf | 0.179±0.149 | 0.442±0.2   | -0.263 | 1.58E-03 | 9.63E-13 | -0.342 |
| cg16875629 | 19 | 36389575  | NFKBID    | 5'UTR            | N_Shore | 0.488±0.083 | 0.75±0.072  | -0.263 | 5.66E-06 | 1.88E-15 | -0.378 |
| cg05191006 | 16 | 69760966  | NQO1      | TSS1500          | S_Shore | 0.124±0.109 | 0.387±0.247 | -0.263 | 9.72E-04 | 1.11E-20 | -0.437 |

|            |    |           |           |                  |         |             |             |        |          |          |        |
|------------|----|-----------|-----------|------------------|---------|-------------|-------------|--------|----------|----------|--------|
| cg20961591 | 19 | 38755588  | SPINT2    | 1st exon         | Island  | 0.3±0.142   | 0.562±0.123 | -0.263 | 7.23E-04 | 7.76E-36 | -0.563 |
| cg01062691 | 16 | 11763141  | SNN       | 5'UTR/1st intron | Island  | 0.203±0.134 | 0.465±0.197 | -0.262 | 8.05E-04 | 1.24E-09 | -0.294 |
| cg06616710 | 10 | 99473224  | MARVELD1  | TSS1500          | Island  | 0.419±0.058 | 0.681±0.066 | -0.262 | 3.58E-08 | 4.14E-36 | -0.565 |
| cg00569673 | 6  | 32160462  | GPSM3     | 5'UTR            | N_Shelf | 0.422±0.114 | 0.684±0.078 | -0.262 | 1.43E-04 | 1.78E-32 | -0.539 |
| cg09354037 | 6  | 32813531  | PSMB8     | TSS1500          | S_Shore | 0.531±0.13  | 0.792±0.064 | -0.262 | 5.21E-04 | 1.84E-11 | -0.323 |
| cg09445448 | 9  | 134151854 | FAM78A    | 5'UTR/1st exon   | Island  | 0.327±0.055 | 0.588±0.178 | -0.261 | 1.01E-05 | 5.58E-07 | -0.244 |
| cg27062617 | 16 | 67281337  | FHOD1     | 5'UTR/1st exon   | Island  | 0.144±0.142 | 0.405±0.222 | -0.261 | 1.69E-03 | 1.55E-05 | -0.211 |
| cg22775000 | 9  | 103235181 | TMEFF1    | TSS1500          | Island  | 0.402±0.209 | 0.663±0.158 | -0.261 | 9.42E-03 | 5.60E-09 | -0.282 |
| cg23859635 | 2  | 42795262  | MTA3      | 5'UTR            | N_Shore | 0.541±0.138 | 0.802±0.084 | -0.261 | 6.80E-04 | 1.13E-28 | -0.510 |
| cg02951552 | 1  | 156051441 | MEX3A     | 1st exon         | N_Shore | 0.351±0.137 | 0.612±0.174 | -0.261 | 7.55E-04 | 1.58E-26 | -0.492 |
| cg04118306 | 8  | 24772350  | NEFM      | 1st exon         | Island  | 0.363±0.142 | 0.623±0.121 | -0.261 | 7.37E-04 | 9.17E-06 | -0.217 |
| cg01414934 | 1  | 26605969  | SH3BGR13  | TSS1500          | N_Shore | 0.397±0.118 | 0.657±0.081 | -0.260 | 1.99E-04 | 5.43E-20 | -0.430 |
| cg00731785 | 4  | 15704680  | BST1      | 5'UTR/1st exon   | Island  | 0.347±0.196 | 0.607±0.148 | -0.260 | 6.65E-03 | 3.09E-30 | -0.522 |
| cg13501527 | 9  | 123640474 | PHF19     | TSS1500          | S_Shore | 0.515±0.14  | 0.775±0.14  | -0.260 | 6.92E-04 | 2.38E-16 | -0.389 |
| cg19858017 | 1  | 9884719   | CLSTN1    | TSS200           | S_Shore | 0.243±0.112 | 0.503±0.221 | -0.260 | 5.97E-04 | 2.11E-08 | -0.272 |
| cg26595520 | 7  | 127671033 | LRRC4     | TSS200           | N_Shore | 0.478±0.045 | 0.737±0.054 | -0.260 | 6.31E-10 | 6.95E-20 | -0.429 |
| cg12760508 | 6  | 111200500 | ADM1      | 5'UTR/1st intron | S_Shelf | 0.436±0.183 | 0.696±0.229 | -0.260 | 6.81E-03 | 1.32E-12 | -0.340 |
| cg02457623 | 1  | 203599089 | ATP2B4    | 5'UTR/1st intron | S_Shore | 0.414±0.107 | 0.674±0.1   | -0.260 | 6.75E-05 | 1.91E-07 | -0.253 |
| cg08802990 | 12 | 32260376  | BICD1     | 1st exon         | S_Shore | 0.164±0.127 | 0.423±0.216 | -0.259 | 9.41E-04 | 6.91E-20 | -0.429 |
| cg04292549 | 19 | 39108723  | MAP4K1    | TSS200           | N_Shore | 0.334±0.075 | 0.593±0.177 | -0.259 | 2.21E-05 | 2.57E-14 | -0.364 |
| cg08302480 | 19 | 54369133  | MYADM     | 5'UTR/1st intron | N_Shelf | 0.503±0.047 | 0.762±0.051 | -0.259 | 2.87E-09 | 4.94E-10 | -0.300 |
| cg13424870 | 17 | 73083812  | SLC16A5   | TSS1500          | N_Shore | 0.347±0.041 | 0.606±0.117 | -0.259 | 1.98E-08 | 1.31E-17 | -0.404 |
| cg16469046 | 2  | 99062999  | INPP4A    | 5'UTR/1st intron | S_Shore | 0.588±0.18  | 0.847±0.05  | -0.259 | 4.44E-03 | 1.20E-16 | -0.393 |
| cg01720186 | 3  | 182970846 | B3GNT5    | TSS200           | N_Shore | 0.199±0.132 | 0.458±0.261 | -0.259 | 2.70E-03 | 1.39E-16 | -0.392 |
| cg04184297 | 17 | 80186266  | SLC16A3   | TSS1500          | Island  | 0.451±0.17  | 0.71±0.091  | -0.259 | 2.94E-03 | 1.01E-09 | -0.295 |
| cg06782692 | 10 | 134121419 | STK32C    | 5'UTR/1st exon   | Island  | 0.138±0.123 | 0.397±0.216 | -0.259 | 8.03E-04 | 3.55E-07 | -0.248 |
| cg25301767 | 12 | 49731393  | C1QL4     | TSS1500          | S_Shore | 0.546±0.099 | 0.805±0.064 | -0.259 | 5.72E-05 | 2.11E-05 | -0.208 |
| cg23297477 | 16 | 66638293  | CMTM3     | 5'UTR/1st exon   | Island  | 0.283±0.18  | 0.542±0.243 | -0.259 | 7.37E-03 | 1.03E-09 | -0.295 |
| cg04482110 | 17 | 41364121  | TMEM106A  | 5'UTR/1st intron | Island  | 0.367±0.19  | 0.625±0.184 | -0.258 | 6.48E-03 | 2.70E-45 | -0.621 |
| cg03573679 | 7  | 2445727   | CHST12    | 5'UTR/1st intron | S_Shore | 0.471±0.107 | 0.729±0.108 | -0.258 | 6.77E-05 | 7.78E-11 | -0.313 |
| cg21642245 | 3  | 195623347 | TNK2      | 5'UTR/1st intron | S_Shore | 0.512±0.1   | 0.77±0.048  | -0.258 | 8.61E-05 | 6.81E-07 | -0.242 |
| cg11543397 | 8  | 120220094 | MAL2      | TSS1500          | N_Shore | 0.351±0.164 | 0.609±0.199 | -0.258 | 3.14E-03 | 8.96E-06 | -0.217 |
| cg12614029 | 11 | 2160564   | IGF2      | 5'UTR            | Island  | 0.447±0.221 | 0.705±0.185 | -0.258 | 1.43E-02 | 4.99E-14 | -0.360 |
| cg21962901 | 19 | 18549134  | ISYNA1    | TSS1500          | Island  | 0.352±0.151 | 0.609±0.086 | -0.258 | 1.43E-03 | 8.24E-18 | -0.406 |
| cg06665109 | 19 | 54369436  | MYADM     | 5'UTR/1st exon   | N_Shelf | 0.59±0.123  | 0.848±0.047 | -0.258 | 4.37E-04 | 8.27E-13 | -0.343 |
| cg14973995 | 4  | 2935692   | MFSD10    | 5'UTR/1st exon   | S_Shore | 0.266±0.15  | 0.523±0.183 | -0.258 | 1.64E-03 | 1.02E-11 | -0.327 |
| cg17300047 | 13 | 49108353  | RCBTB2    | TSS1500          | S_Shore | 0.534±0.131 | 0.791±0.082 | -0.257 | 5.09E-04 | 6.40E-06 | -0.220 |
| cg02561912 | 20 | 50158202  | NFATC2    | 5'UTR/1st intron | N_Shore | 0.084±0.047 | 0.341±0.178 | -0.257 | 1.08E-05 | 4.05E-08 | -0.266 |
| cg02756056 | 6  | 32813582  | PSMB8     | TSS1500          | S_Shore | 0.464±0.132 | 0.721±0.082 | -0.257 | 5.40E-04 | 8.96E-22 | -0.448 |
| cg17795059 | 22 | 45704902  | FAM118A   | 1st exon         | N_Shore | 0.464±0.122 | 0.721±0.055 | -0.257 | 4.09E-04 | 8.23E-07 | -0.240 |
| cg12624792 | 22 | 38714001  | CNSK1E    | 5'UTR/1st exon   | S_Shore | 0.307±0.126 | 0.564±0.15  | -0.257 | 3.58E-04 | 3.24E-11 | -0.319 |
| cg19403104 | 19 | 50031246  | RCN3      | 5'UTR/1st exon   | S_Shelf | 0.489±0.113 | 0.746±0.065 | -0.257 | 1.95E-04 | 7.93E-09 | -0.279 |
| cg27453857 | 17 | 4689640   | VMO1      | 1st exon         | S_Shelf | 0.534±0.111 | 0.79±0.051  | -0.257 | 2.03E-04 | 1.02E-05 | -0.215 |
| cg17787134 | 17 | 47073522  | IGF2BP1   | TSS1500          | Island  | 0.198±0.116 | 0.455±0.221 | -0.257 | 7.60E-04 | 3.47E-09 | -0.286 |
| cg00537121 | 11 | 67055633  | ANKRD13D  | TSS1500          | N_Shore | 0.432±0.104 | 0.689±0.077 | -0.257 | 7.42E-05 | 6.39E-20 | -0.429 |
| cg23344780 | 19 | 48829487  | EMP3      | 5'UTR/1st intron | N_Shelf | 0.319±0.174 | 0.575±0.123 | -0.256 | 3.51E-03 | 1.94E-11 | -0.323 |
| cg06334134 | 7  | 142986693 | CASP2     | 5'UTR/1st exon   | S_Shore | 0.199±0.154 | 0.455±0.222 | -0.256 | 3.07E-03 | 7.26E-09 | -0.280 |
| cg03085719 | 11 | 3860569   | RHOG      | 5'UTR/1st intron | N_Shore | 0.451±0.111 | 0.707±0.066 | -0.256 | 1.70E-04 | 2.48E-23 | -0.463 |
| cg09115984 | 16 | 31214426  | PYCARD    | TSS1500          | S_Shore | 0.293±0.085 | 0.549±0.184 | -0.256 | 6.09E-05 | 3.36E-13 | -0.348 |
| cg22029587 | 2  | 233925001 | INPP5D    | 5'UTR/1st exon   | N_Shore | 0.276±0.164 | 0.532±0.192 | -0.256 | 3.13E-03 | 1.89E-08 | -0.273 |
| cg15083233 | 9  | 112810402 | AKAP2     | TSS1500          | N_Shore | 0.562±0.115 | 0.817±0.045 | -0.256 | 2.96E-04 | 2.76E-08 | -0.269 |
| cg08347042 | 19 | 45579378  | ZNF296    | 1st exon         | N_Shelf | 0.121±0.16  | 0.377±0.199 | -0.256 | 2.88E-03 | 1.57E-07 | -0.255 |
| cg12253437 | 6  | 32813448  | PSMB8     | TSS1500          | S_Shore | 0.476±0.129 | 0.731±0.062 | -0.256 | 5.71E-04 | 4.08E-11 | -0.318 |
| cg03585419 | 19 | 54369681  | MYADM     | 5'UTR/1st intron | N_Shelf | 0.399±0.126 | 0.655±0.176 | -0.256 | 4.99E-04 | 2.39E-10 | -0.305 |
| cg16519300 | 1  | 16084830  | FBLIM1    | 5'UTR            | N_Shore | 0.4±0.15    | 0.655±0.124 | -0.256 | 1.31E-03 | 1.30E-17 | -0.404 |
| cg12666727 | 1  | 42128487  | HIVEP3    | 5'UTR            | Island  | 0.394±0.247 | 0.649±0.211 | -0.256 | 2.60E-02 | 1.41E-07 | -0.256 |
| cg13391638 | 7  | 112430772 | TMEM168   | TSS1500          | S_Shore | 0.342±0.181 | 0.597±0.199 | -0.256 | 5.88E-03 | 1.59E-11 | -0.324 |
| cg10865498 | 20 | 35975022  | SRC       | 5'UTR/1st intron | S_Shore | 0.552±0.168 | 0.807±0.052 | -0.255 | 3.29E-03 | 7.64E-46 | -0.624 |
| cg21225170 | 5  | 137610391 | GFRA3     | TSS200           | S_Shore | 0.493±0.126 | 0.748±0.067 | -0.255 | 4.52E-04 | 4.40E-17 | -0.398 |
| cg21504064 | 17 | 41363502  | TMEM106A  | TSS1500          | N_Shore | 0.305±0.221 | 0.56±0.209  | -0.255 | 1.62E-02 | 1.60E-36 | -0.568 |
| cg19099850 | 14 | 55595958  | LGALS3    | 5'UTR/1st exon   | Island  | 0.295±0.26  | 0.551±0.271 | -0.255 | 3.86E-02 | 3.89E-11 | -0.318 |
| cg19136673 | 6  | 32813337  | PSMB8     | TSS1500          | S_Shore | 0.482±0.121 | 0.737±0.065 | -0.255 | 3.44E-04 | 1.86E-12 | -0.338 |
| cg21026022 | 18 | 21719568  | CABYR     | 5'UTR/1st intron | S_Shore | 0.39±0.213  | 0.645±0.271 | -0.255 | 1.95E-02 | 4.20E-08 | -0.266 |
| cg26403843 | 5  | 158634085 | RNF145    | 5'UTR/1st intron | N_Shelf | 0.43±0.151  | 0.685±0.193 | -0.255 | 2.01E-03 | 3.98E-28 | -0.506 |
| cg16771783 | 10 | 82116392  | DYDC1     | 5'UTR/1st intron | Island  | 0.387±0.104 | 0.641±0.135 | -0.255 | 6.06E-05 | 1.60E-13 | -0.353 |
| cg04879832 | 16 | 88717456  | CYBA      | 5'UTR/1st exon   | Island  | 0.497±0.165 | 0.751±0.048 | -0.254 | 3.13E-03 | 7.84E-38 | -0.576 |
| cg02227453 | 22 | 50919482  | ADM2      | TSS1500          | Island  | 0.502±0.101 | 0.756±0.112 | -0.254 | 4.13E-05 | 2.82E-07 | -0.250 |
| cg19663795 | 16 | 30393854  | SEPT1     | 1st exon         | S_Shelf | 0.528±0.124 | 0.782±0.051 | -0.254 | 4.95E-04 | 6.69E-37 | -0.570 |
| cg13167664 | 11 | 2158987   | IGF2      | 5'UTR            | Island  | 0.168±0.13  | 0.422±0.252 | -0.254 | 2.53E-03 | 8.45E-14 | -0.357 |
| cg06367659 | 22 | 50919817  | ADM2      | TSS1500          | Island  | 0.186±0.186 | 0.44±0.242  | -0.254 | 9.53E-03 | 1.36E-12 | -0.340 |
| cg03946324 | 10 | 14995581  | DCLRE1C   | 5'UTR/1st intron | N_Shore | 0.147±0.15  | 0.401±0.279 | -0.254 | 6.42E-03 | 4.33E-33 | -0.544 |
| cg17332573 | 6  | 26250934  | HIST1H2BH | TSS1500          | S_Shelf | 0.47±0.138  | 0.724±0.139 | -0.253 | 7.53E-04 | 4.09E-06 | -0.225 |
| cg09418984 | 19 | 54369447  | MYADM     | 5'UTR/1st exon   | N_Shelf | 0.612±0.123 | 0.865±0.035 | -0.253 | 5.53E-04 | 1.46E-11 | -0.325 |
| cg25450266 | 19 | 35494294  | GRAMD1A   | 5'UTR/1st intron | S_Shelf | 0.473±0.124 | 0.725±0.094 | -0.253 | 3.46E-04 | 5.20E-25 | -0.479 |
| cg24641737 | 1  | 111743271 | DENND2D   | 5'UTR/1st exon   | N_Shelf | 0.435±0.11  | 0.687±0.136 | -0.252 | 1.14E-04 | 1.19E-30 | -0.526 |
| cg02553663 | 17 | 80291775  | SECTM1    | 5'UTR/1st exon   | Island  | 0.466±0.189 | 0.718±0.163 | -0.252 | 6.73E-03 | 7.01E-06 | -0.219 |
| cg05347898 | 6  | 24358304  | CDCC2     | 5'UTR/1st intron | N_Shore | 0.322±0.226 | 0.574±0.245 | -0.252 | 2.21E-02 | 3.35E-06 | -0.227 |
| cg05306745 | 17 | 76921845  | TIMP2     | TSS1500          | Island  | 0.46±0.219  | 0.712±0.142 | -0.252 | 1.39E-02 | 7.73E-12 | -0.329 |
| cg26546113 | 1  | 182810711 | DHX9      | 5'UTR/1st intron | S_Shore | 0.428±0.188 | 0.68±0.195  | -0.252 | 7.61E-03 | 1.33E-08 | -0.275 |
| cg04515001 | 6  | 24358236  | CDCC2     | 5'UTR/1st exon   | N_Shore | 0.395±0.219 | 0.646±0.221 | -0.251 | 1.80E-02 | 2.86E-07 | -0.250 |
| cg00123104 | 1  | 9884732   | CLSTN1    | TSS200           | S_Shore | 0.356±0.122 | 0.608±0.16  | -0.251 | 3.70E-04 | 5.41E-07 | -0.244 |
| cg15551881 | 9  | 123688715 | TRAF1     | 5'UTR            | N_Shelf | 0.608±0.118 | 0.859±0.036 | -0.251 | 4.51E-04 | 1.59E-35 | -0.561 |
| cg26165146 | 12 | 27484656  | ARNTL2    | TSS1500          | N_Shore | 0.512±0.1   | 0.763±0.141 | -0.251 | 5.42E-05 | 2.62E-17 | -0.401 |
| cg03802185 | 7  | 101927846 | SH2B2     | TSS1500          | N_Shore | 0.537±0.119 | 0.789±0.05  | -0.251 | 3.97E-04 | 8.24E-10 | -0.297 |
| cg26371512 | 7  | 112430779 | TMEM168   | TSS1500          | S_Shore | 0.305±0.181 | 0.556±0.186 | -0.251 | 6.01E-03 | 7.35E-14 | -0.357 |
| cg02988947 | 17 | 61778813  | LIMD2     | TSS1500          | S_Shore | 0.498±0.122 | 0.749±0.05  | -0.251 | 4.97E-04 | 3.43E-20 | -0.432 |
| cg26517849 | 11 | 2161141   | IGF2      | 5'UTR            | Island  | 0.45±0.088  |             |        |          |          |        |

|            |    |           |          |                  |         |             |             |        |          |          |        |
|------------|----|-----------|----------|------------------|---------|-------------|-------------|--------|----------|----------|--------|
| cg11591325 | 5  | 76012591  | F2R      | 5'UTR/1st intron | S_Shore | 0.203±0.077 | 0.454±0.221 | -0.251 | 2.79E-04 | 4.03E-07 | -0.247 |
| cg05995220 | 20 | 55964998  | RBM38    | TSS1500          | S_Shore | 0.336±0.167 | 0.587±0.046 | -0.251 | 3.53E-03 | 6.33E-10 | -0.299 |
| cg06055013 | 10 | 116853664 | ATRN1    | 1st exon         | Island  | 0.166±0.115 | 0.417±0.268 | -0.250 | 2.81E-03 | 2.12E-08 | -0.272 |
| cg00676801 | 2  | 191876673 | STAT1    | 5'UTR            | N_Shore | 0.423±0.141 | 0.673±0.174 | -0.250 | 1.25E-03 | 2.02E-27 | -0.500 |
| cg01848457 | 12 | 104697983 | TXNRD1   | 5'UTR            | Island  | 0.392±0.188 | 0.642±0.193 | -0.250 | 7.98E-03 | 1.79E-25 | -0.483 |
| cg01848457 | 12 | 104697983 | EID3     | 1st exon         | Island  | 0.392±0.188 | 0.642±0.193 | -0.250 | 7.98E-03 | 5.04E-24 | -0.470 |
| cg06679087 | 10 | 99473206  | MARVELD1 | TSS1500          | Island  | 0.61±0.077  | 0.86±0.041  | -0.250 | 1.42E-05 | 2.45E-50 | -0.648 |
| cg17729941 | 1  | 153607617 | S100A13  | TSS1500          | S_Shore | 0.384±0.166 | 0.634±0.165 | -0.250 | 3.46E-03 | 4.35E-06 | -0.224 |
| cg09877117 | 19 | 47735882  | BBC3     | 5'UTR/1st exon   | S_Shore | 0.234±0.066 | 0.484±0.112 | -0.250 | 4.46E-07 | 3.31E-07 | -0.248 |
| cg08291098 | 20 | 62285239  | STMN3    | TSS1500          | S_Shore | 0.384±0.189 | 0.634±0.199 | -0.249 | 8.38E-03 | 2.44E-08 | -0.270 |
| cg00651401 | 3  | 195623338 | TNK2     | 5'UTR/1st intron | S_Shore | 0.488±0.119 | 0.737±0.086 | -0.249 | 2.92E-04 | 9.80E-06 | -0.216 |
| cg00757933 | 6  | 29760864  | HCG4     | TSS200           | Island  | 0.209±0.107 | 0.458±0.224 | -0.249 | 7.94E-04 | 7.04E-09 | -0.280 |
| cg13184736 | 1  | 68299409  | GNG12    | TSS1500          | S_Shore | 0.392±0.184 | 0.64±0.155  | -0.249 | 6.22E-03 | 8.13E-11 | -0.313 |
| cg02044895 | 11 | 58343318  | LPXN     | 5'UTR/1st exon   | N_Shelf | 0.543±0.135 | 0.792±0.055 | -0.249 | 9.99E-04 | 3.48E-41 | -0.597 |
| cg27373972 | 6  | 33244788  | B3GALT4  | TSS200           | Island  | 0.434±0.149 | 0.683±0.075 | -0.249 | 1.69E-03 | 3.12E-62 | -0.701 |
| cg02349096 | 19 | 11450198  | RAB3D    | 5'UTR/1st exon   | Island  | 0.383±0.152 | 0.632±0.09  | -0.249 | 1.88E-03 | 3.41E-35 | -0.559 |
| cg26120958 | 11 | 6439806   | APBB1    | 5'UTR/1st intron | N_Shore | 0.412±0.113 | 0.661±0.056 | -0.249 | 2.73E-04 | 6.00E-17 | -0.396 |
| cg26173847 | 7  | 127671017 | LRRC4    | TSS200           | N_Shore | 0.556±0.07  | 0.804±0.055 | -0.248 | 2.32E-06 | 9.09E-20 | -0.428 |
| cg25338707 | 11 | 63973846  | FERMT3   | TSS1500          | N_Shore | 0.433±0.085 | 0.681±0.05  | -0.248 | 2.74E-05 | 1.22E-42 | -0.606 |
| cg07818563 | 16 | 16043225  | ABCC1    | TSS1500          | Island  | 0.192±0.14  | 0.44±0.197  | -0.248 | 1.74E-03 | 6.63E-09 | -0.281 |
| cg08480068 | 16 | 29674959  | SPN      | 5'UTR/1st intron | N_Shore | 0.628±0.103 | 0.876±0.061 | -0.248 | 1.21E-04 | 1.15E-45 | -0.623 |
| cg10483825 | 12 | 21810450  | LDHB     | 5'UTR/1st exon   | N_Shore | 0.402±0.123 | 0.649±0.099 | -0.248 | 3.56E-04 | 2.21E-20 | -0.434 |
| cg26888530 | 4  | 7941792   | AFAP1    | TSS200           | Island  | 0.302±0.234 | 0.55±0.306  | -0.248 | 3.72E-02 | 3.51E-17 | -0.399 |
| cg23066808 | 7  | 2446566   | CHST12   | 5'UTR/1st intron | S_Shelf | 0.492±0.108 | 0.739±0.083 | -0.248 | 1.36E-04 | 1.04E-09 | -0.295 |
| cg04625862 | 3  | 48341880  | NME6     | 5'UTR/1st intron | N_Shore | 0.563±0.13  | 0.811±0.04  | -0.248 | 8.70E-04 | 1.10E-06 | -0.237 |
| cg08231730 | 11 | 63753169  | OTUB1    | TSS200           | N_Shore | 0.388±0.151 | 0.635±0.155 | -0.247 | 1.90E-03 | 2.88E-09 | -0.287 |
| cg17243289 | 18 | 45458021  | SMAD2    | TSS1500          | Island  | 0.333±0.14  | 0.579±0.15  | -0.247 | 1.11E-03 | 6.41E-08 | -0.262 |
| cg01086895 | 11 | 6676515   | DCHS1    | 5'UTR/1st intron | Island  | 0.061±0.058 | 0.308±0.259 | -0.247 | 1.02E-03 | 2.25E-05 | -0.207 |
| cg13102585 | 17 | 42386208  | RUNDC3A  | 1st exon         | Island  | 0.402±0.087 | 0.648±0.1   | -0.247 | 1.19E-05 | 3.41E-05 | -0.203 |
| cg23264429 | 10 | 90642003  | STAMBP1  | 5'UTR/1st intron | S_Shore | 0.518±0.136 | 0.764±0.104 | -0.246 | 8.77E-04 | 1.61E-18 | -0.414 |
| cg02571816 | 19 | 38747378  | PPP1R14A | TSS200           | Island  | 0.517±0.114 | 0.763±0.063 | -0.246 | 2.90E-04 | 8.25E-10 | -0.297 |
| cg00619207 | 1  | 111743368 | DENND2D  | TSS200           | N_Shelf | 0.411±0.107 | 0.656±0.138 | -0.246 | 1.27E-04 | 1.70E-25 | -0.483 |
| cg00259834 | 3  | 16553499  | RFTN1    | 5'UTR/1st intron | N_Shore | 0.176±0.131 | 0.422±0.208 | -0.246 | 1.58E-03 | 3.71E-49 | -0.642 |
| cg06385449 | 11 | 63974123  | FERMT3   | TSS200           | N_Shore | 0.505±0.116 | 0.75±0.048  | -0.245 | 3.92E-04 | 8.83E-51 | -0.650 |
| cg22740783 | 2  | 27341458  | CGREF1   | 5'UTR/1st intron | N_Shore | 0.403±0.184 | 0.648±0.252 | -0.245 | 1.21E-02 | 2.42E-24 | -0.473 |
| cg09088834 | 20 | 25565460  | NINL     | 5'UTR/1st intron | Island  | 0.335±0.115 | 0.58±0.156  | -0.245 | 2.90E-04 | 2.21E-11 | -0.322 |
| cg17644208 | 2  | 25142391  | ADCY3    | 5'UTR/1st intron | N_Shore | 0.23±0.1    | 0.475±0.161 | -0.245 | 1.12E-04 | 2.32E-05 | -0.207 |
| cg18633684 | 12 | 104697387 | EID3     | TSS200           | Island  | 0.419±0.187 | 0.664±0.184 | -0.245 | 8.43E-03 | 2.01E-14 | -0.365 |
| cg19837790 | 10 | 97804137  | CCN1     | 5'UTR            | Island  | 0.306±0.116 | 0.551±0.132 | -0.245 | 2.40E-04 | 2.15E-19 | -0.424 |
| cg01837574 | 17 | 7836610   | CNTROB   | 1st exon         | S_Shelf | 0.56±0.17   | 0.805±0.073 | -0.245 | 4.30E-03 | 1.57E-05 | -0.211 |
| cg16672562 | 19 | 46801672  | HIF3A    | 5'UTR/1st exon   | S_Shore | 0.577±0.219 | 0.822±0.135 | -0.244 | 1.62E-02 | 7.73E-11 | -0.313 |
| cg07921503 | 7  | 2445843   | CHST12   | 5'UTR/1st intron | S_Shore | 0.497±0.105 | 0.741±0.051 | -0.244 | 1.88E-04 | 3.62E-13 | -0.348 |
| cg13087076 | 10 | 82116405  | DYDC1    | 5'UTR/1st intron | Island  | 0.39±0.108  | 0.634±0.148 | -0.244 | 1.67E-04 | 5.67E-14 | -0.359 |
| cg04477789 | 16 | 30935822  | FBXL19   | 5'UTR/1st intron | S_Shore | 0.404±0.14  | 0.649±0.159 | -0.244 | 1.28E-03 | 8.64E-17 | -0.394 |
| cg06233293 | 2  | 47596185  | EPCAM    | TSS200           | N_Shore | 0.162±0.126 | 0.407±0.245 | -0.244 | 2.80E-03 | 1.19E-09 | -0.294 |
| cg16644366 | 16 | 29674903  | SPN      | 5'UTR/1st intron | N_Shore | 0.517±0.103 | 0.761±0.054 | -0.244 | 1.58E-04 | 6.75E-23 | -0.459 |
| cg07086380 | 5  | 118691033 | TNFAIP8  | 5'UTR            | N_Shore | 0.611±0.108 | 0.856±0.041 | -0.244 | 2.82E-04 | 1.53E-24 | -0.475 |
| cg02614129 | 5  | 134733615 | H2AFY    | 5'UTR/1st intron | N_Shore | 0.266±0.138 | 0.509±0.24  | -0.244 | 3.57E-03 | 6.53E-09 | -0.281 |
| cg09025501 | 16 | 88717472  | CYBA     | 5'UTR/1st exon   | Island  | 0.469±0.155 | 0.712±0.054 | -0.243 | 2.72E-03 | 2.67E-31 | -0.531 |
| cg03431846 | 14 | 24641183  | REC8     | TSS200           | Island  | 0.521±0.095 | 0.764±0.061 | -0.243 | 6.81E-05 | 3.37E-12 | -0.334 |
| cg06023570 | 2  | 7058545   | RNF144A  | 5'UTR/1st intron | S_Shore | 0.337±0.133 | 0.58±0.212  | -0.243 | 1.93E-03 | 1.50E-11 | -0.324 |
| cg27252395 | 6  | 24358327  | DCDC2    | 5'UTR/1st intron | N_Shore | 0.335±0.214 | 0.577±0.192 | -0.243 | 1.73E-02 | 9.95E-07 | -0.238 |
| cg13177786 | 11 | 10472099  | AMPD3    | 5'UTR/1st intron | Island  | 0.166±0.25  | 0.409±0.261 | -0.243 | 4.07E-02 | 5.51E-09 | -0.282 |
| cg11033273 | 11 | 35966115  | LDLRAD3  | 5'UTR/1st intron | Island  | 0.38±0.106  | 0.623±0.115 | -0.243 | 1.08E-04 | 2.00E-09 | -0.290 |
| cg18442524 | 5  | 137610372 | GFRA3    | TSS200           | S_Shore | 0.561±0.124 | 0.804±0.047 | -0.243 | 6.94E-04 | 8.41E-23 | -0.458 |
| cg09546802 | 5  | 145215546 | PRELID2  | TSS1500          | S_Shore | 0.493±0.132 | 0.735±0.092 | -0.243 | 7.88E-04 | 1.06E-06 | -0.238 |
| cg26700716 | 2  | 183730940 | FRZB     | 1st exon         | N_Shore | 0.459±0.096 | 0.702±0.1   | -0.243 | 4.06E-05 | 8.34E-10 | -0.296 |
| cg06632214 | 11 | 314074    | IFITM1   | 5'UTR/1st exon   | S_Shelf | 0.367±0.194 | 0.609±0.306 | -0.243 | 2.39E-02 | 6.95E-37 | -0.570 |
| cg16415340 | 11 | 2160964   | IGF2     | 5'UTR            | Island  | 0.562±0.063 | 0.805±0.078 | -0.243 | 2.11E-07 | 8.43E-20 | -0.428 |
| cg18534491 | 14 | 24641155  | REC8     | TSS200           | Island  | 0.554±0.102 | 0.796±0.067 | -0.242 | 1.12E-04 | 3.50E-09 | -0.286 |
| cg20583073 | 19 | 3178759   | S1PR4    | 5'UTR/1st exon   | Island  | 0.475±0.081 | 0.717±0.069 | -0.242 | 9.62E-06 | 3.51E-21 | -0.442 |
| cg24432073 | 4  | 76555634  | CDKL2    | 5'UTR/1st exon   | Island  | 0.41±0.133  | 0.652±0.111 | -0.242 | 7.71E-04 | 1.73E-06 | -0.233 |
| cg05697726 | 6  | 32812933  | PSMB8    | TSS1500          | S_Shore | 0.487±0.12  | 0.729±0.069 | -0.242 | 4.56E-04 | 1.09E-16 | -0.393 |
| cg13165140 | 6  | 32813522  | PSMB8    | TSS1500          | S_Shore | 0.481±0.117 | 0.724±0.067 | -0.242 | 3.75E-04 | 8.83E-14 | -0.356 |
| cg26301953 | 6  | 32164503  | GPSM3    | TSS1500          | S_Shore | 0.405±0.107 | 0.647±0.121 | -0.242 | 1.28E-04 | 1.93E-08 | -0.272 |
| cg03684062 | 19 | 3179364   | S1PR4    | 1st exon         | Island  | 0.485±0.097 | 0.727±0.068 | -0.242 | 7.63E-05 | 2.15E-27 | -0.500 |
| cg17924813 | 4  | 15704844  | BST1     | 1st exon         | Island  | 0.375±0.157 | 0.617±0.116 | -0.242 | 2.63E-03 | 5.08E-34 | -0.551 |
| cg27573591 | 7  | 127672152 | LRRC4    | TSS1500          | Island  | 0.416±0.087 | 0.658±0.079 | -0.242 | 1.88E-05 | 1.65E-16 | -0.391 |
| cg14042635 | 17 | 40440916  | STAT5A   | 5'UTR            | Island  | 0.465±0.099 | 0.706±0.089 | -0.242 | 6.44E-05 | 3.38E-20 | -0.432 |
| cg19954537 | 2  | 97204401  | ARID5A   | 5'UTR/1st intron | S_Shore | 0.568±0.112 | 0.81±0.044  | -0.242 | 3.58E-04 | 1.28E-06 | -0.236 |
| cg16777510 | 17 | 40440022  | STAT5A   | 5'UTR/1st exon   | N_Shore | 0.418±0.114 | 0.659±0.1   | -0.242 | 2.25E-04 | 4.99E-20 | -0.431 |
| cg14565781 | 1  | 45274513  | BTBD19   | 1st exon         | S_Shelf | 0.487±0.159 | 0.729±0.121 | -0.241 | 2.86E-03 | 6.22E-13 | -0.345 |
| cg03752203 | 8  | 103874399 | AZIN1    | 5'UTR/1st intron | N_Shore | 0.525±0.187 | 0.766±0.2   | -0.241 | 9.85E-03 | 9.89E-12 | -0.327 |
| cg24819835 | 4  | 15780011  | CD38     | 1st exon         | Island  | 0.407±0.145 | 0.648±0.095 | -0.241 | 1.61E-03 | 4.42E-13 | -0.347 |
| cg13816423 | 6  | 41513166  | FOXP4    | TSS1500          | N_Shore | 0.456±0.128 | 0.697±0.163 | -0.241 | 7.88E-04 | 2.04E-08 | -0.272 |
| cg09154880 | 6  | 32813715  | PSMB8    | TSS1500          | S_Shore | 0.613±0.152 | 0.854±0.053 | -0.241 | 2.59E-03 | 4.86E-16 | -0.385 |
| cg21549285 | 21 | 42799141  | MX1      | 5'UTR            | S_Shore | 0.424±0.13  | 0.664±0.182 | -0.241 | 1.16E-03 | 3.09E-15 | -0.375 |
| cg08146256 | 14 | 21734410  | HNRNPC   | 5'UTR/1st intron | N_Shelf | 0.464±0.168 | 0.705±0.188 | -0.241 | 5.43E-03 | 1.98E-12 | -0.337 |
| cg14951497 | 2  | 191875807 | STAT1    | 5'UTR            | N_Shelf | 0.507±0.11  | 0.747±0.158 | -0.241 | 2.60E-04 | 1.02E-25 | -0.485 |
| cg06379589 | 16 | 88767124  | RNF166   | 5'UTR            | S_Shelf | 0.47±0.121  | 0.711±0.062 | -0.241 | 5.52E-04 | 4.00E-07 | -0.247 |
| cg06472476 | 19 | 54369471  | MYADM    | 5'UTR/1st exon   | N_Shelf | 0.423±0.117 | 0.664±0.065 | -0.241 | 3.99E-04 | 9.10E-13 | -0.342 |
| cg17733616 | 17 | 73083887  | SLC16A5  | 5'UTR/1st exon   | Island  | 0.484±0.075 | 0.725±0.063 | -0.241 | 4.76E-06 | 8.72E-24 | -0.468 |
| cg12580445 | 5  | 121414634 | LOX      | TSS1500          | S_Shore | 0.387±0.13  | 0.628±0.191 | -0.241 | 1.35E-03 | 1.01E-05 | -0.216 |
| cg19000647 | 2  | 11885321  | LPIN1    | TSS1500          | N_Shore | 0.525±0.162 | 0.765±0.095 | -0.240 | 3.35E-03 | 3.62E-05 | -0.202 |
| cg26010734 | 19 | 15344046  | EPHX3    | TSS1500          | N_Shore | 0.466±0.152 | 0.707±0.133 | -0.240 | 2.29E-03 | 3.60E-09 | -0.286 |
| cg06357561 | 17 | 40439501  | STAT5A   | TSS1500          | N_Shore | 0.49±0.041  | 0.73±0.092  | -0.240 | 2.52E-09 | 2.07E-32 | -0.539 |
| cg21397588 | 1  | 203598954 | ATP2B4   | 5'UTR/1st intron | S_Shore | 0.47±0.111  | 0.71±0.055  | -0.240 | 2.99E-04 | 5        |        |

|            |    |           |          |                  |         |             |             |        |          |          |        |
|------------|----|-----------|----------|------------------|---------|-------------|-------------|--------|----------|----------|--------|
| cg08843517 | 16 | 88717464  | CYBA     | 5'UTR/1st exon   | Island  | 0.603±0.172 | 0.842±0.034 | -0.240 | 5.45E-03 | 8.85E-36 | -0.563 |
| cg19808978 | 19 | 50031273  | RCN3     | 5'UTR/1st exon   | S_Shelf | 0.456±0.099 | 0.696±0.071 | -0.240 | 9.38E-05 | 9.89E-09 | -0.278 |
| cg21152671 | 9  | 123690586 | TRAF1    | 5'UTR/1st intron | N_Shore | 0.352±0.108 | 0.592±0.191 | -0.240 | 5.06E-04 | 1.31E-05 | -0.213 |
| cg26588045 | 19 | 41283090  | RAB4B    | TSS1500          | N_Shore | 0.348±0.094 | 0.587±0.16  | -0.240 | 9.60E-05 | 1.74E-06 | -0.233 |
| cg26614816 | 12 | 104697532 | EID3     | 5'UTR/1st exon   | Island  | 0.426±0.221 | 0.665±0.182 | -0.240 | 2.04E-02 | 5.01E-15 | -0.373 |
| cg07912766 | 18 | 45458698  | SMAD2    | TSS1500          | S_Shore | 0.559±0.238 | 0.798±0.112 | -0.239 | 2.54E-02 | 2.87E-08 | -0.269 |
| cg20690774 | 11 | 45202557  | PRDM11   | 5'UTR/1st intron | Island  | 0.265±0.188 | 0.504±0.194 | -0.239 | 1.02E-02 | 3.09E-10 | -0.304 |
| cg15774391 | 17 | 40439628  | STAT5A   | 5'UTR/1st exon   | N_Shore | 0.363±0.075 | 0.602±0.117 | -0.239 | 3.87E-06 | 8.31E-30 | -0.519 |
| cg11102782 | 19 | 18549136  | ISYNA1   | TSS1500          | Island  | 0.447±0.144 | 0.686±0.089 | -0.239 | 1.66E-03 | 1.09E-20 | -0.437 |
| cg24255928 | 10 | 97802966  | CCNJ     | TSS200           | Island  | 0.43±0.268  | 0.669±0.146 | -0.239 | 4.21E-02 | 5.13E-29 | -0.513 |
| cg27121758 | 19 | 3178742   | S1PR4    | 5'UTR/1st exon   | Island  | 0.483±0.11  | 0.722±0.051 | -0.239 | 3.05E-04 | 1.35E-29 | -0.517 |
| cg10729426 | 19 | 58038585  | ZNF549   | TSS200           | Island  | 0.334±0.26  | 0.573±0.246 | -0.239 | 4.68E-02 | 2.32E-53 | -0.662 |
| cg18645906 | 4  | 15704599  | BST1     | 5'UTR/1st exon   | N_Shore | 0.487±0.167 | 0.726±0.125 | -0.239 | 4.29E-03 | 5.06E-30 | -0.521 |
| cg26620176 | 19 | 8117047   | CCL25    | TSS1500          | S_Shore | 0.555±0.121 | 0.794±0.086 | -0.239 | 4.62E-04 | 2.44E-06 | -0.230 |
| cg16686733 | 20 | 25566563  | NINL     | TSS1500          | S_Shore | 0.225±0.129 | 0.463±0.237 | -0.238 | 3.16E-03 | 1.85E-07 | -0.253 |
| cg19863210 | 8  | 142139002 | DENND3   | 5'UTR/1st intron | Island  | 0.237±0.196 | 0.475±0.226 | -0.238 | 1.54E-02 | 1.14E-05 | -0.214 |
| cg09863247 | 20 | 44539966  | PLTP     | TSS1500          | N_Shore | 0.434±0.095 | 0.672±0.109 | -0.238 | 4.40E-05 | 8.32E-13 | -0.343 |
| cg02654940 | 6  | 34206400  | HMG1     | 5'UTR            | S_Shore | 0.56±0.116  | 0.798±0.065 | -0.238 | 4.17E-04 | 7.68E-30 | -0.519 |
| cg01059100 | 16 | 31214607  | PYCARD   | TSS1500          | S_Shore | 0.325±0.075 | 0.563±0.151 | -0.238 | 1.73E-05 | 4.00E-19 | -0.421 |
| cg03776194 | 16 | 88770966  | RNF166   | TSS1500          | N_Shore | 0.591±0.122 | 0.829±0.057 | -0.238 | 6.39E-04 | 2.62E-14 | -0.363 |
| cg25767433 | 6  | 33386985  | SYNGAP1  | TSS1500          | S_Shore | 0.574±0.115 | 0.811±0.059 | -0.238 | 4.11E-04 | 2.74E-14 | -0.363 |
| cg09091424 | 11 | 67057304  | ANKRD13D | 5'UTR            | S_Shore | 0.262±0.117 | 0.499±0.153 | -0.237 | 4.24E-04 | 1.67E-37 | -0.574 |
| cg07516252 | 14 | 24641201  | REC8     | TSS200           | Island  | 0.476±0.095 | 0.713±0.059 | -0.237 | 8.23E-05 | 6.93E-13 | -0.344 |
| cg02780269 | 17 | 80292252  | SECTM1   | TSS1500          | Island  | 0.573±0.131 | 0.81±0.035  | -0.237 | 1.26E-03 | 1.92E-23 | -0.465 |
| cg19808205 | 1  | 67217984  | TCTEX1D1 | TSS200           | N_Shore | 0.452±0.177 | 0.689±0.15  | -0.236 | 6.62E-03 | 2.11E-14 | -0.365 |
| cg13380204 | 17 | 40441155  | STAT5A   | 5'UTR            | S_Shore | 0.552±0.099 | 0.788±0.072 | -0.236 | 9.78E-05 | 2.78E-18 | -0.412 |
| cg06889086 | 7  | 55638230  | VOPP1    | 5'UTR/1st intron | N_Shore | 0.506±0.119 | 0.742±0.102 | -0.236 | 4.02E-04 | 1.11E-21 | -0.447 |
| cg03559682 | 11 | 6439864   | APBB1    | 5'UTR/1st intron | Island  | 0.433±0.149 | 0.669±0.122 | -0.236 | 2.18E-03 | 9.48E-11 | -0.312 |
| cg27306119 | 2  | 9144605   | MBOAT2   | TSS1500          | Island  | 0.331±0.181 | 0.567±0.16  | -0.236 | 7.93E-03 | 1.67E-10 | -0.308 |
| cg20125091 | 1  | 92952641  | GFI1     | TSS1500          | S_Shore | 0.387±0.179 | 0.623±0.187 | -0.236 | 8.50E-03 | 1.25E-06 | -0.236 |
| cg18426551 | 17 | 42147617  | G6PC3    | TSS1500          | N_Shore | 0.471±0.048 | 0.707±0.083 | -0.236 | 7.09E-09 | 6.56E-07 | -0.242 |
| cg07462448 | 10 | 115441840 | CASP7    | 5'UTR/1st intron | S_Shore | 0.594±0.137 | 0.83±0.044  | -0.236 | 1.62E-03 | 2.17E-05 | -0.208 |
| cg04517263 | 9  | 123689193 | TRAF1    | 5'UTR/1st intron | N_Shore | 0.642±0.121 | 0.878±0.041 | -0.236 | 7.58E-04 | 1.60E-27 | -0.501 |
| cg01321189 | 12 | 32259338  | BICD1    | TSS1500          | Island  | 0.193±0.104 | 0.429±0.245 | -0.236 | 2.15E-03 | 1.29E-10 | -0.310 |
| cg01647936 | 11 | 63974772  | FERMT3   | 5'UTR/1st intron | N_Shore | 0.365±0.096 | 0.6±0.054   | -0.236 | 1.09E-04 | 2.61E-37 | -0.573 |
| cg00284173 | 2  | 24273093  | FKBP1B   | 5'UTR/1st intron | Island  | 0.132±0.119 | 0.368±0.212 | -0.235 | 1.59E-03 | 1.13E-09 | -0.294 |
| cg20585869 | 8  | 24772333  | NEFM     | 1st exon         | Island  | 0.355±0.133 | 0.59±0.098  | -0.235 | 1.01E-03 | 4.42E-06 | -0.224 |
| cg01657207 | 3  | 44690019  | ZNF35    | TSS1500          | N_Shore | 0.415±0.164 | 0.65±0.204  | -0.235 | 6.29E-03 | 5.66E-19 | -0.419 |
| cg02134976 | 6  | 42110740  | C6orf132 | TSS200           | S_Shore | 0.38±0.181  | 0.615±0.186 | -0.235 | 9.07E-03 | 1.56E-18 | -0.414 |
| cg11706729 | 6  | 32813154  | PSMB8    | TSS1500          | S_Shore | 0.36±0.124  | 0.595±0.121 | -0.235 | 5.94E-04 | 4.79E-25 | -0.479 |
| cg21210090 | 4  | 15704429  | BST1     | TSS200           | N_Shore | 0.407±0.148 | 0.642±0.141 | -0.235 | 2.34E-03 | 1.46E-36 | -0.568 |
| cg14417329 | 17 | 80186273  | SLC16A3  | TSS1500          | Island  | 0.453±0.157 | 0.687±0.082 | -0.234 | 3.34E-03 | 4.11E-08 | -0.266 |
| cg00255919 | 5  | 131827918 | IRF1     | TSS1500          | S_Shore | 0.505±0.128 | 0.739±0.078 | -0.234 | 8.58E-04 | 1.34E-23 | -0.466 |
| cg08461586 | 10 | 97802977  | CCNJ     | TSS200           | Island  | 0.318±0.155 | 0.552±0.121 | -0.234 | 3.06E-03 | 7.37E-31 | -0.527 |
| cg24765602 | 14 | 65006071  | HSPA2    | TSS1500          | N_Shore | 0.399±0.137 | 0.633±0.164 | -0.234 | 1.67E-03 | 1.92E-05 | -0.209 |
| cg02657012 | 6  | 32812965  | PSMB8    | TSS1500          | S_Shore | 0.546±0.122 | 0.78±0.064  | -0.234 | 6.79E-04 | 3.21E-16 | -0.388 |
| cg07682037 | 11 | 63974153  | FERMT3   | 5'UTR/1st exon   | N_Shore | 0.474±0.118 | 0.708±0.047 | -0.234 | 6.29E-04 | 1.44E-48 | -0.639 |
| cg25384897 | 6  | 32813544  | PSMB8    | TSS1500          | S_Shore | 0.511±0.142 | 0.745±0.063 | -0.234 | 1.91E-03 | 1.61E-14 | -0.366 |
| cg02346790 | 3  | 122296409 | PARP15   | TSS200           | N_Shore | 0.503±0.181 | 0.737±0.179 | -0.234 | 9.09E-03 | 2.87E-27 | -0.499 |
| cg10402417 | 11 | 67171476  | TBC1D10C | 1st exon         | S_Shelf | 0.496±0.113 | 0.73±0.06   | -0.234 | 3.87E-04 | 1.35E-24 | -0.475 |
| cg26769927 | 16 | 29674972  | SPN      | 5'UTR/1st intron | N_Shore | 0.642±0.109 | 0.876±0.056 | -0.234 | 3.11E-04 | 1.35E-44 | -0.617 |
| cg10421029 | 16 | 30936028  | FBXL19   | 5'UTR/1st exon   | S_Shore | 0.446±0.102 | 0.68±0.131  | -0.234 | 1.20E-04 | 3.43E-13 | -0.348 |
| cg02931058 | 2  | 239047245 | KLHL30   | TSS200           | N_Shelf | 0.55±0.078  | 0.783±0.095 | -0.234 | 5.57E-06 | 1.73E-10 | -0.308 |
| cg15694715 | 11 | 118402280 | TMEM25   | 5'UTR/1st intron | S_Shore | 0.526±0.2   | 0.76±0.181  | -0.234 | 1.47E-02 | 1.89E-23 | -0.465 |
| cg01286655 | 11 | 12031099  | DKK3     | TSS1500          | S_Shore | 0.483±0.146 | 0.717±0.131 | -0.233 | 2.11E-03 | 8.29E-10 | -0.297 |
| cg21195185 | 4  | 76555782  | CDKL2    | TSS200           | Island  | 0.455±0.14  | 0.688±0.119 | -0.233 | 1.52E-03 | 9.55E-06 | -0.216 |
| cg16396284 | 6  | 33245537  | B3GALT4  | 1st exon         | Island  | 0.542±0.107 | 0.775±0.054 | -0.233 | 2.84E-04 | 3.90E-20 | -0.432 |
| cg09293391 | 6  | 144386418 | PLAGL1   | TSS1500          | S_Shore | 0.544±0.059 | 0.777±0.092 | -0.233 | 1.81E-07 | 2.94E-05 | -0.204 |
| cg25139493 | 1  | 39957400  | BMP8A    | 5'UTR/1st exon   | Island  | 0.429±0.097 | 0.661±0.168 | -0.233 | 2.00E-04 | 9.38E-07 | -0.239 |
| cg08755490 | 11 | 65554678  | OVOL1    | 5'UTR/1st exon   | Island  | 0.151±0.171 | 0.384±0.185 | -0.232 | 7.20E-03 | 1.00E-05 | -0.216 |
| cg19564367 | 4  | 7941852   | AFAP1    | TSS200           | Island  | 0.409±0.142 | 0.641±0.23  | -0.232 | 4.87E-03 | 5.99E-19 | -0.419 |
| cg16425038 | 14 | 24641194  | REC8     | TSS200           | Island  | 0.623±0.095 | 0.855±0.06  | -0.232 | 9.39E-05 | 4.71E-11 | -0.317 |
| cg12060422 | 10 | 102821684 | KAZALD1  | 1st exon         | Island  | 0.441±0.226 | 0.673±0.277 | -0.232 | 3.87E-02 | 1.01E-47 | -0.634 |
| cg09216670 | 10 | 22999381  | PIP4K2A  | 5'UTR/1st intron | N_Shelf | 0.531±0.143 | 0.763±0.047 | -0.232 | 2.26E-03 | 8.99E-17 | -0.394 |
| cg19056772 | 17 | 7341616   | FGF11    | 1st exon         | N_Shore | 0.525±0.082 | 0.756±0.048 | -0.232 | 3.57E-05 | 2.86E-16 | -0.388 |
| cg12091732 | 10 | 82116446  | DYDC1    | 5'UTR/1st intron | Island  | 0.395±0.118 | 0.626±0.172 | -0.232 | 7.67E-04 | 1.59E-10 | -0.308 |
| cg19337852 | 19 | 38755293  | SPINT2   | 5'UTR/1st exon   | Island  | 0.408±0.2   | 0.639±0.128 | -0.232 | 1.35E-02 | 4.52E-25 | -0.479 |
| cg23683674 | 11 | 73020562  | ARHGEF17 | 1st exon         | Island  | 0.288±0.173 | 0.52±0.18   | -0.231 | 7.64E-03 | 3.95E-10 | -0.302 |
| cg26477549 | 12 | 106642937 | CKAP4    | TSS1500          | S_Shore | 0.298±0.123 | 0.529±0.232 | -0.231 | 3.01E-03 | 9.03E-15 | -0.369 |
| cg11857033 | 17 | 29297552  | RNF135   | TSS1500          | N_Shore | 0.475±0.122 | 0.706±0.108 | -0.231 | 5.87E-04 | 5.39E-30 | -0.521 |
| cg06479653 | 18 | 10525737  | NAPG     | TSS200           | N_Shore | 0.156±0.065 | 0.386±0.223 | -0.231 | 5.54E-04 | 2.18E-07 | -0.252 |
| cg22821981 | 3  | 122296435 | PARP15   | TSS200           | N_Shore | 0.445±0.191 | 0.676±0.19  | -0.231 | 1.33E-02 | 2.45E-20 | -0.434 |
| cg25636933 | 4  | 56816405  | CEP135   | 5'UTR/1st intron | S_Shore | 0.519±0.103 | 0.749±0.169 | -0.231 | 3.25E-04 | 1.00E-09 | -0.295 |
| cg23369564 | 1  | 150123734 | PLEKH01  | 5'UTR            | S_Shore | 0.539±0.111 | 0.77±0.046  | -0.231 | 4.60E-04 | 5.47E-41 | -0.596 |
| cg17149644 | 11 | 126225276 | ST3GAL4  | TSS1500          | N_Shore | 0.11±0.07   | 0.34±0.255  | -0.230 | 1.83E-03 | 8.26E-06 | -0.218 |
| cg17037101 | 11 | 2161314   | IGF2     | 5'UTR            | Island  | 0.539±0.048 | 0.769±0.07  | -0.230 | 7.24E-09 | 2.72E-16 | -0.388 |
| cg25563256 | 17 | 7341641   | FGF11    | 1st exon         | N_Shore | 0.516±0.078 | 0.747±0.081 | -0.230 | 7.89E-06 | 5.37E-14 | -0.359 |
| cg13860281 | 7  | 55638724  | VOPP1    | 5'UTR/1st intron | N_Shore | 0.353±0.109 | 0.583±0.138 | -0.230 | 2.87E-04 | 5.87E-20 | -0.430 |
| cg21941030 | 19 | 50031017  | RCN3     | 5'UTR/1st exon   | S_Shelf | 0.593±0.109 | 0.823±0.037 | -0.230 | 4.46E-04 | 1.86E-11 | -0.323 |
| cg09302355 | 11 | 63974131  | FERMT3   | TSS200           | N_Shore | 0.468±0.103 | 0.698±0.052 | -0.230 | 2.44E-04 | 1.69E-51 | -0.653 |
| cg20317872 | 1  | 111743202 | DENND2D  | 5'UTR/1st exon   | N_Shelf | 0.596±0.101 | 0.826±0.059 | -0.230 | 1.92E-04 | 1.53E-35 | -0.561 |
| cg12222132 | 4  | 78978705  | FRAS1    | TSS200           | N_Shore | 0.171±0.101 | 0.4±0.211   | -0.229 | 1.03E-03 | 6.09E-08 | -0.263 |
| cg01322214 | 7  | 25219198  | C7orf31  | 5'UTR/1st intron | N_Shore | 0.57±0.158  | 0.799±0.097 | -0.229 | 3.95E-03 | 8.74E-22 | -0.449 |
| cg21410080 | 21 | 43639862  | ABCG1    | 5'UTR            | Island  | 0.31±0.194  | 0.539±0.242 | -0.229 | 2.02E-02 | 7.26E-07 | -0.241 |
| cg21097090 | 5  | 118693764 | TNFAIP8  | 5'UTR            | S_Shelf | 0.634±0.127 | 0.863±0.038 | -0.229 | 1.24E-03 | 2.20E-16 | -0.390 |
| cg26596719 | 7  | 142986429 | CASP2    | TSS1500          | S_Shore | 0.483±0.146 | 0.712±0.12  | -0.229 | 2.38E-03 | 5.92E-12 | -0.330 |
| cg08599448 | 19 | 11689614  | ACPS     | 5'UTR/1st intron | Island  | 0.22±0.128  | 0.449±0.206 | -0.229 | 2.44E-03 | 9.5      |        |

|            |    |           |          |                  |         |             |             |        |          |          |        |
|------------|----|-----------|----------|------------------|---------|-------------|-------------|--------|----------|----------|--------|
| cg00753478 | 12 | 21810489  | LDHB     | 5'UTR/1st exon   | Island  | 0.394±0.148 | 0.622±0.189 | -0.229 | 3.93E-03 | 4.59E-12 | -0.332 |
| cg01667702 | 17 | 7836604   | CNTROB   | 1st exon         | S_Shelf | 0.453±0.185 | 0.682±0.147 | -0.229 | 1.02E-02 | 9.10E-06 | -0.217 |
| cg00252032 | 6  | 43043815  | PTK7     | TSS1500          | N_Shore | 0.347±0.108 | 0.575±0.165 | -0.229 | 4.34E-04 | 1.02E-19 | -0.427 |
| cg24152605 | 19 | 57050359  | ZFP28    | 5'UTR/1st exon   | Island  | 0.411±0.241 | 0.639±0.259 | -0.229 | 4.64E-02 | 5.48E-36 | -0.564 |
| cg12640109 | 11 | 62104720  | ASRGL1   | TSS200           | N_Shore | 0.332±0.125 | 0.56±0.178  | -0.228 | 1.35E-03 | 6.99E-17 | -0.396 |
| cg04949489 | 12 | 21810092  | LDHB     | 5'UTR/1st intron | N_Shore | 0.282±0.174 | 0.51±0.162  | -0.228 | 7.87E-03 | 6.37E-19 | -0.419 |
| cg04262471 | 6  | 33245585  | B3GALT4  | 1st exon         | S_Shore | 0.429±0.119 | 0.658±0.116 | -0.228 | 5.37E-04 | 1.01E-15 | -0.382 |
| cg14188639 | 11 | 2161544   | IGF2     | 5'UTR            | Island  | 0.587±0.106 | 0.815±0.067 | -0.228 | 2.60E-04 | 1.61E-14 | -0.366 |
| cg13462576 | 15 | 74726520  | SEMA7A   | TSS1500          | S_Shore | 0.322±0.139 | 0.55±0.115  | -0.228 | 1.74E-03 | 6.41E-11 | -0.315 |
| cg25323057 | 10 | 88730481  | AGAP11   | TSS200           | S_Shore | 0.428±0.106 | 0.656±0.162 | -0.228 | 3.72E-04 | 1.06E-09 | -0.295 |
| cg16341159 | 17 | 7121370   | DLG4     | TSS1500          | S_Shelf | 0.311±0.094 | 0.539±0.1   | -0.228 | 5.77E-05 | 4.28E-12 | -0.333 |
| cg20532370 | 3  | 139258730 | RBP1     | TSS1500          | Island  | 0.276±0.19  | 0.504±0.213 | -0.228 | 1.60E-02 | 9.84E-09 | -0.278 |
| cg14654468 | 17 | 80186336  | SLC16A3  | 5'UTR/1st exon   | Island  | 0.462±0.176 | 0.69±0.126  | -0.228 | 7.70E-03 | 2.58E-06 | -0.229 |
| cg13194425 | 17 | 7341936   | FGF11    | TSS1500          | N_Shore | 0.564±0.127 | 0.792±0.069 | -0.228 | 1.03E-03 | 3.32E-18 | -0.411 |
| cg19790294 | 16 | 88717755  | CYBA     | TSS1500          | N_Shelf | 0.384±0.118 | 0.612±0.12  | -0.228 | 4.91E-04 | 1.34E-33 | -0.548 |
| cg23511432 | 5  | 137610255 | GFRA3    | TSS200           | Island  | 0.502±0.101 | 0.729±0.063 | -0.228 | 1.81E-04 | 1.09E-15 | -0.381 |
| cg26015401 | 19 | 49436967  | DHDH     | 5'UTR/1st exon   | Island  | 0.245±0.211 | 0.472±0.187 | -0.228 | 2.19E-02 | 4.95E-07 | -0.245 |
| cg00544337 | 10 | 82116203  | DYDC1    | 5'UTR/1st intron | Island  | 0.539±0.09  | 0.766±0.055 | -0.227 | 7.81E-05 | 3.59E-07 | -0.248 |
| cg27576946 | 17 | 73893202  | TRIM65   | TSS200           | Island  | 0.276±0.156 | 0.503±0.153 | -0.227 | 4.25E-03 | 2.56E-16 | -0.389 |
| cg14165142 | 20 | 3778655   | CDC25B   | 5'UTR            | S_Shore | 0.352±0.153 | 0.579±0.198 | -0.227 | 5.39E-03 | 1.40E-34 | -0.554 |
| cg24088438 | 11 | 63974229  | FERMT3   | 5'UTR/1st exon   | N_Shore | 0.438±0.113 | 0.665±0.055 | -0.227 | 5.34E-04 | 3.05E-44 | -0.615 |
| cg09072560 | 1  | 32802218  | MARCKSL1 | TSS1500          | Island  | 0.286±0.156 | 0.513±0.202 | -0.227 | 6.16E-03 | 1.21E-16 | -0.393 |
| cg26493353 | 9  | 91793721  | SHC3     | TSS200           | S_Shore | 0.111±0.095 | 0.338±0.264 | -0.227 | 3.89E-03 | 1.52E-07 | -0.255 |
| cg08028295 | 11 | 64612633  | CDC42BPG | TSS1500          | Island  | 0.193±0.137 | 0.42±0.181  | -0.227 | 2.51E-03 | 8.86E-16 | -0.382 |
| cg09477407 | 12 | 104697545 | EID3     | 5'UTR/1st exon   | Island  | 0.375±0.192 | 0.601±0.153 | -0.227 | 1.31E-02 | 2.99E-15 | -0.376 |
| cg18473090 | 19 | 49436786  | DHDH     | TSS200           | Island  | 0.146±0.147 | 0.373±0.206 | -0.227 | 4.91E-03 | 1.42E-06 | -0.235 |
| cg00338735 | 4  | 53728038  | RASL11B  | TSS1500          | Island  | 0.419±0.2   | 0.646±0.194 | -0.227 | 1.82E-02 | 1.31E-06 | -0.236 |
| cg20781880 | 19 | 3179741   | S1PR4    | 1st exon         | Island  | 0.421±0.07  | 0.648±0.131 | -0.226 | 7.60E-06 | 2.09E-14 | -0.365 |
| cg11877254 | 19 | 10222051  | P2RY11   | TSS200           | N_Shelf | 0.557±0.121 | 0.783±0.059 | -0.226 | 8.55E-04 | 3.29E-09 | -0.286 |
| cg19241689 | 6  | 33245516  | B3GALT4  | 1st exon         | Island  | 0.433±0.094 | 0.66±0.068  | -0.226 | 9.02E-05 | 2.19E-14 | -0.364 |
| cg14995562 | 22 | 38714166  | CSNK1E   | TSS1500          | S_Shore | 0.389±0.077 | 0.615±0.099 | -0.226 | 8.55E-06 | 4.19E-20 | -0.431 |
| cg05985737 | 1  | 17306885  | MFAP2    | 5'UTR/1st intron | Island  | 0.19±0.117  | 0.416±0.194 | -0.226 | 1.41E-03 | 7.93E-06 | -0.218 |
| cg10154122 | 19 | 38754855  | SPINT2   | TSS1500          | Island  | 0.344±0.186 | 0.57±0.175  | -0.226 | 1.21E-02 | 1.79E-18 | -0.414 |
| cg03125427 | 16 | 88717482  | CYBA     | 5'UTR/1st exon   | Island  | 0.528±0.203 | 0.754±0.112 | -0.226 | 1.62E-02 | 3.23E-28 | -0.506 |
| cg18016254 | 3  | 122296505 | PARP15   | 5'UTR/1st exon   | N_Shore | 0.383±0.176 | 0.609±0.206 | -0.226 | 1.13E-02 | 3.05E-14 | -0.363 |
| cg17691156 | 8  | 59572928  | NSMAF    | TSS1500          | S_Shore | 0.295±0.162 | 0.521±0.188 | -0.226 | 6.79E-03 | 1.16E-06 | -0.237 |
| cg04053242 | 20 | 1246772   | SNPH     | TSS200           | Island  | 0.191±0.15  | 0.417±0.181 | -0.226 | 4.27E-03 | 1.60E-10 | -0.308 |
| cg09079275 | 5  | 157003083 | ADAM19   | TSS1500          | S_Shore | 0.264±0.129 | 0.49±0.198  | -0.226 | 2.41E-03 | 2.68E-07 | -0.250 |
| cg18125510 | 14 | 100841768 | WARS     | 5'UTR/1st exon   | N_Shore | 0.187±0.146 | 0.412±0.233 | -0.226 | 7.06E-03 | 2.52E-09 | -0.288 |
| cg16882373 | 7  | 26191458  | NFE2L3   | TSS1500          | N_Shore | 0.569±0.159 | 0.794±0.099 | -0.225 | 4.46E-03 | 9.17E-24 | -0.468 |
| cg27125093 | 19 | 3179828   | S1PR4    | 1st exon         | Island  | 0.599±0.106 | 0.824±0.057 | -0.225 | 3.28E-04 | 1.22E-22 | -0.457 |
| cg17745097 | 1  | 11863365  | MTHFR    | 5'UTR/1st intron | N_Shelf | 0.487±0.112 | 0.712±0.057 | -0.225 | 5.12E-04 | 1.07E-05 | -0.215 |
| cg02288341 | 5  | 137610226 | GFRA3    | 5'UTR/1st exon   | Island  | 0.513±0.093 | 0.738±0.066 | -0.225 | 9.01E-05 | 4.05E-15 | -0.374 |
| cg20337103 | 11 | 118781778 | BCL9L    | TSS200           | S_Shore | 0.328±0.125 | 0.553±0.261 | -0.225 | 6.80E-03 | 1.43E-08 | -0.275 |
| cg03359362 | 19 | 47289611  | SLC1A5   | 5'UTR/1st intron | N_Shore | 0.216±0.126 | 0.441±0.217 | -0.225 | 3.13E-03 | 9.64E-23 | -0.458 |
| cg20695297 | 19 | 3178844   | S1PR4    | 1st exon         | Island  | 0.587±0.105 | 0.812±0.067 | -0.225 | 2.62E-04 | 1.12E-24 | -0.476 |
| cg21387418 | 6  | 33244775  | B3GALT4  | TSS200           | Island  | 0.306±0.118 | 0.531±0.082 | -0.225 | 6.03E-04 | 4.65E-59 | -0.688 |
| cg18581405 | 19 | 3180035   | S1PR4    | 1st exon/3'UTR   | S_Shore | 0.474±0.134 | 0.699±0.121 | -0.225 | 1.52E-03 | 1.17E-40 | -0.594 |
| cg22070406 | 18 | 55019708  | ST8SIA3  | TSS200           | Island  | 0.472±0.075 | 0.697±0.08  | -0.225 | 6.10E-06 | 2.20E-07 | -0.252 |
| cg13266096 | 11 | 62366806  | MTA2     | 5'UTR            | N_Shore | 0.301±0.116 | 0.526±0.132 | -0.225 | 5.40E-04 | 7.81E-17 | -0.395 |
| cg07846167 | 1  | 16084758  | FBLIM1   | 5'UTR            | N_Shore | 0.329±0.132 | 0.554±0.164 | -0.225 | 1.82E-03 | 7.22E-15 | -0.371 |
| cg20967139 | 12 | 54785055  | ZNF385A  | 5'UTR/1st exon   | Island  | 0.532±0.105 | 0.756±0.064 | -0.225 | 2.76E-04 | 1.73E-07 | -0.254 |
| cg06126335 | 7  | 73497616  | LIMK1    | TSS1500          | N_Shore | 0.477±0.132 | 0.702±0.079 | -0.225 | 1.44E-03 | 1.68E-07 | -0.254 |
| cg13928782 | 11 | 2162445   | IGF2     | 5'UTR            | Island  | 0.539±0.075 | 0.763±0.076 | -0.224 | 6.88E-06 | 4.84E-11 | -0.317 |
| cg18628371 | 14 | 24641189  | REC8     | TSS200           | Island  | 0.539±0.091 | 0.763±0.049 | -0.224 | 1.08E-04 | 2.81E-08 | -0.269 |
| cg03280026 | 7  | 112430707 | TMEM168  | TSS1500          | S_Shore | 0.327±0.139 | 0.552±0.151 | -0.224 | 2.28E-03 | 3.93E-12 | -0.333 |
| cg14525270 | 1  | 43766647  | TIE1     | 5'UTR/1st exon   | N_Shelf | 0.557±0.127 | 0.781±0.055 | -0.224 | 1.28E-03 | 6.50E-09 | -0.281 |
| cg19166302 | 3  | 122296613 | PARP15   | 1st exon         | Island  | 0.427±0.186 | 0.651±0.183 | -0.224 | 1.33E-02 | 2.22E-07 | -0.252 |
| cg06575572 | 22 | 45705265  | FAM118A  | 1st exon         | N_Shore | 0.394±0.106 | 0.619±0.113 | -0.224 | 2.30E-04 | 5.17E-08 | -0.264 |
| cg17950095 | 7  | 27224700  | HOXA11   | 1st exon         | N_Shore | 0.358±0.067 | 0.582±0.145 | -0.224 | 1.63E-05 | 1.26E-05 | -0.213 |
| cg14788334 | 1  | 26606110  | SH3BGRL3 | TSS200           | N_Shore | 0.414±0.093 | 0.638±0.126 | -0.224 | 8.52E-05 | 8.95E-16 | -0.382 |
| cg08145723 | 11 | 130029478 | ST14     | TSS1500          | N_Shore | 0.394±0.215 | 0.618±0.19  | -0.224 | 2.61E-02 | 1.66E-17 | -0.403 |
| cg16408081 | 11 | 67205869  | PTPRCAP  | TSS1500          | S_Shelf | 0.583±0.08  | 0.806±0.084 | -0.224 | 1.43E-05 | 5.68E-41 | -0.596 |
| cg06905823 | 22 | 39638316  | PDGFB    | TSS1500          | Island  | 0.086±0.065 | 0.309±0.241 | -0.224 | 1.43E-03 | 7.57E-06 | -0.219 |
| cg26117023 | 2  | 74782096  | DOK1     | 5'UTR/1st intron | Island  | 0.284±0.087 | 0.507±0.175 | -0.224 | 2.27E-04 | 1.70E-05 | -0.210 |
| cg19989295 | 14 | 24641077  | REC8     | TSS200           | Island  | 0.556±0.099 | 0.779±0.072 | -0.223 | 1.55E-04 | 3.12E-08 | -0.268 |
| cg25607249 | 19 | 47288039  | SLC1A5   | 5'UTR/1st exon   | N_Shelf | 0.231±0.106 | 0.455±0.114 | -0.223 | 2.40E-04 | 7.62E-21 | -0.439 |
| cg02732252 | 16 | 3068014   | CLDN6    | 5'UTR/1st intron | Island  | 0.536±0.079 | 0.759±0.063 | -0.223 | 1.99E-05 | 7.03E-08 | -0.262 |
| cg25262528 | 6  | 86158972  | NT5E     | TSS1500          | N_Shore | 0.403±0.147 | 0.626±0.205 | -0.223 | 5.35E-03 | 1.02E-11 | -0.327 |
| cg18213979 | 17 | 29297873  | RNF135   | TSS200           | N_Shore | 0.382±0.158 | 0.605±0.185 | -0.223 | 6.25E-03 | 3.07E-47 | -0.632 |
| cg23950233 | 6  | 33245739  | B3GALT4  | 1st exon         | S_Shore | 0.514±0.122 | 0.737±0.107 | -0.223 | 7.86E-04 | 7.68E-06 | -0.218 |
| cg01320573 | 6  | 33387003  | SYNGAP1  | TSS1500          | S_Shore | 0.588±0.109 | 0.811±0.038 | -0.223 | 5.49E-04 | 1.17E-14 | -0.368 |
| cg12044599 | 11 | 67206308  | PTPRCAP  | TSS1500          | S_Shelf | 0.689±0.102 | 0.912±0.064 | -0.223 | 2.41E-04 | 4.43E-49 | -0.641 |
| cg03665078 | 5  | 118689961 | TNFAIP8  | 5'UTR            | N_Shore | 0.61±0.107  | 0.833±0.029 | -0.223 | 5.34E-04 | 7.21E-28 | -0.504 |
| cg06594281 | 17 | 73083692  | SLC16A5  | TSS1500          | N_Shore | 0.487±0.1   | 0.709±0.035 | -0.223 | 3.24E-04 | 5.96E-32 | -0.536 |
| cg14588642 | 11 | 67139423  | CLCF1    | 5'UTR/1st intron | N_Shore | 0.354±0.151 | 0.576±0.232 | -0.223 | 8.61E-03 | 3.53E-07 | -0.248 |
| cg23963071 | 6  | 2901712   | SERPINB9 | 5'UTR/1st intron | N_Shore | 0.45±0.092  | 0.672±0.076 | -0.223 | 7.78E-05 | 1.41E-05 | -0.212 |
| cg21647257 | 19 | 36523945  | CLIP3    | TSS1500          | S_Shore | 0.398±0.06  | 0.62±0.106  | -0.222 | 7.44E-07 | 1.05E-05 | -0.215 |
| cg10829727 | 17 | 73084309  | SLC16A5  | 5'UTR/1st intron | Island  | 0.444±0.065 | 0.666±0.083 | -0.222 | 1.01E-06 | 7.28E-19 | -0.418 |
| cg01602621 | 19 | 11689813  | ACPS     | 5'UTR/1st exon   | S_Shore | 0.387±0.138 | 0.61±0.24   | -0.222 | 6.91E-03 | 2.25E-21 | -0.444 |
| cg04249754 | 1  | 32715483  | LCK      | TSS1500          | S_Shore | 0.433±0.045 | 0.655±0.08  | -0.222 | 7.06E-09 | 2.35E-12 | -0.336 |
| cg08089518 | 17 | 39941714  | JUP      | 5'UTR/1st intron | N_Shore | 0.307±0.133 | 0.53±0.223  | -0.222 | 4.69E-03 | 3.66E-10 | -0.302 |
| cg08747889 | 6  | 43043786  | PTK7     | TSS1500          | N_Shore | 0.456±0.138 | 0.678±0.148 | -0.222 | 2.20E-03 | 1.24E-23 | -0.466 |
| cg04490178 | 19 | 3179545   | S1PR4    | 1st exon         | Island  | 0.491±0.096 | 0.713±0.088 | -0.222 | 1.03E-04 | 2.52E-20 | -0.434 |
| cg23979458 | 17 | 80291982  | SECTM1   | TSS200           | Island  | 0.405±0.169 | 0.628±0.135 | -0.222 | 7.22E-03 | 2.90E-05 | -0.204 |
| cg15777261 | 2  | 73462569  | CCT7     | 5'UTR/1st intron | S_Shore | 0.494±0.114 | 0.716±0.149 | -0.222 | 6.50E-04 | 2.02E-20 | -0.435 |
| cg22812275 | 6  | 159240814 | EZR      | TSS1500          | S_Shore | 0.376±0.121 | 0.598±0.192 | -0.222 | 1.84E-03 | 4.45E-13 | -0.    |

|            |    |           |          |                  |         |             |             |        |          |          |        |
|------------|----|-----------|----------|------------------|---------|-------------|-------------|--------|----------|----------|--------|
| cg08167706 | 7  | 134144106 | AKR1B1   | TSS200           | S_Shore | 0.455±0.218 | 0.677±0.177 | -0.222 | 2.75E-02 | 1.33E-09 | -0.293 |
| cg18345635 | 17 | 80186080  | SLC16A3  | TSS1500          | N_Shore | 0.441±0.073 | 0.663±0.089 | -0.222 | 4.98E-06 | 1.25E-10 | -0.310 |
| cg02701825 | 17 | 73083632  | SLC16A5  | TSS1500          | N_Shore | 0.531±0.109 | 0.752±0.064 | -0.222 | 4.33E-04 | 5.57E-28 | -0.504 |
| cg07773769 | 3  | 52280329  | PPM1M    | 5'UTR/1st exon   | S_Shore | 0.253±0.119 | 0.474±0.155 | -0.222 | 9.26E-04 | 1.56E-26 | -0.492 |
| cg26574680 | 1  | 235811860 | GNG4     | 5'UTR/1st intron | N_Shelf | 0.361±0.139 | 0.583±0.242 | -0.222 | 7.47E-03 | 2.24E-05 | -0.207 |
| cg17471836 | 5  | 118691007 | TNFAIP8  | 5'UTR            | N_Shore | 0.664±0.115 | 0.886±0.027 | -0.221 | 8.60E-04 | 9.10E-20 | -0.428 |
| cg10465028 | 11 | 63753203  | OTUB1    | TSS200           | N_Shore | 0.438±0.093 | 0.66±0.165  | -0.221 | 2.49E-04 | 2.59E-10 | -0.305 |
| cg21462428 | 12 | 4381448   | CND2     | TSS1500          | Island  | 0.374±0.169 | 0.595±0.217 | -0.221 | 1.20E-02 | 1.28E-05 | -0.213 |
| cg19430780 | 19 | 38397004  | SIPA1L3  | TSS1500          | Island  | 0.223±0.097 | 0.444±0.199 | -0.221 | 8.94E-04 | 1.75E-05 | -0.210 |
| cg04986504 | 11 | 12031266  | DKK3     | TSS1500          | S_Shore | 0.65±0.115  | 0.871±0.059 | -0.221 | 6.58E-04 | 7.37E-12 | -0.329 |
| cg07519235 | 16 | 19894978  | GPRC5B   | 5'UTR/1st intron | Island  | 0.48±0.242  | 0.701±0.219 | -0.221 | 4.65E-02 | 1.08E-12 | -0.341 |
| cg04569429 | 17 | 37024625  | LASP1    | TSS1500          | N_Shore | 0.166±0.059 | 0.387±0.25  | -0.221 | 2.00E-03 | 2.25E-05 | -0.207 |
| cg11087049 | 14 | 51296586  | NIN      | 5'UTR            | N_Shore | 0.21±0.087  | 0.431±0.215 | -0.221 | 1.05E-03 | 2.45E-09 | -0.288 |
| cg15350899 | 11 | 118781763 | BCL9L    | TSS200           | S_Shore | 0.416±0.129 | 0.637±0.239 | -0.221 | 5.78E-03 | 2.18E-10 | -0.306 |
| cg01406381 | 19 | 47288263  | SLC1A5   | 5'UTR/1st intron | N_Shelf | 0.169±0.09  | 0.39±0.139  | -0.221 | 9.45E-05 | 6.85E-20 | -0.429 |
| cg21054441 | 15 | 68871409  | CORO2B   | 5'UTR            | Island  | 0.385±0.132 | 0.605±0.162 | -0.220 | 2.09E-03 | 1.15E-06 | -0.237 |
| cg00508334 | 7  | 23510438  | IGF2BP3  | TSS1500          | S_Shore | 0.081±0.094 | 0.301±0.218 | -0.220 | 1.42E-03 | 2.16E-08 | -0.271 |
| cg05935571 | 3  | 32023257  | OSBPPL10 | 5'UTR/1st exon   | Island  | 0.113±0.059 | 0.333±0.25  | -0.220 | 2.03E-03 | 1.28E-05 | -0.213 |
| cg09375033 | 3  | 137833634 | DZIP1L   | 5'UTR/1st intron | N_Shore | 0.485±0.161 | 0.705±0.197 | -0.220 | 8.38E-03 | 4.98E-30 | -0.521 |
| cg00792966 | 6  | 21595983  | SOX4     | 1st exon         | N_Shore | 0.179±0.193 | 0.399±0.216 | -0.220 | 2.08E-02 | 2.78E-12 | -0.335 |
| cg11375102 | 16 | 1583810   | TMEM204  | 5'UTR/1st exon   | Island  | 0.503±0.105 | 0.723±0.05  | -0.220 | 3.98E-04 | 2.13E-09 | -0.290 |
| cg26018685 | 12 | 46663660  | SLC38A1  | TSS1500          | S_Shore | 0.493±0.178 | 0.712±0.182 | -0.220 | 1.21E-02 | 7.18E-26 | -0.487 |
| cg15825065 | 8  | 133687344 | LRRC6    | 1st exon         | N_Shore | 0.347±0.117 | 0.566±0.19  | -0.220 | 1.67E-03 | 1.61E-10 | -0.308 |
| cg15681358 | 10 | 99474521  | MARVELD1 | 1st exon/3'UTR   | S_Shore | 0.529±0.102 | 0.749±0.034 | -0.220 | 4.02E-04 | 1.43E-33 | -0.547 |
| cg24865779 | 21 | 34775042  | IFNGR2   | TSS200           | N_Shore | 0.573±0.079 | 0.792±0.044 | -0.220 | 4.33E-05 | 3.18E-17 | -0.400 |
| cg25163476 | 11 | 2161586   | IGF2     | 5'UTR            | Island  | 0.466±0.111 | 0.686±0.073 | -0.220 | 4.67E-04 | 5.17E-13 | -0.346 |
| cg23734137 | 15 | 96868114  | NR2F2    | TSS1500          | S_Shore | 0.52±0.125  | 0.739±0.082 | -0.219 | 1.15E-03 | 1.66E-06 | -0.233 |
| cg02674352 | 11 | 61275826  | LRRC10B  | TSS1500          | Island  | 0.308±0.128 | 0.527±0.204 | -0.219 | 3.36E-03 | 2.84E-05 | -0.205 |
| cg09130035 | 12 | 21810139  | LDHB     | 5'UTR/1st intron | N_Shore | 0.345±0.113 | 0.564±0.134 | -0.219 | 5.37E-04 | 1.24E-32 | -0.541 |
| cg17280299 | 5  | 132082690 | CNNI2    | TSS1500          | N_Shore | 0.428±0.205 | 0.647±0.193 | -0.219 | 2.41E-02 | 1.30E-19 | -0.426 |
| cg13500576 | 1  | 51796588  | TTCT39A  | TSS1500          | Island  | 0.114±0.061 | 0.333±0.188 | -0.219 | 1.94E-04 | 6.40E-10 | -0.298 |
| cg03717367 | 9  | 139980219 | MAN1B1   | TSS1500          | N_Shore | 0.47±0.119  | 0.688±0.083 | -0.219 | 8.03E-04 | 9.42E-09 | -0.278 |
| cg22538054 | 12 | 95941988  | USP44    | 5'UTR/1st exon   | Island  | 0.475±0.159 | 0.694±0.091 | -0.219 | 5.32E-03 | 4.12E-07 | -0.246 |
| cg12476763 | 19 | 58111647  | ZNF530   | 5'UTR/1st intron | Island  | 0.189±0.147 | 0.408±0.182 | -0.219 | 4.82E-03 | 5.46E-12 | -0.331 |
| cg01346718 | 22 | 38713874  | CSNK1E   | 5'UTR/1st intron | S_Shore | 0.546±0.143 | 0.765±0.093 | -0.219 | 2.75E-03 | 1.62E-16 | -0.391 |
| cg22032521 | 11 | 125757328 | HYLS1    | 5'UTR/1st exon   | Island  | 0.2±0.094   | 0.418±0.202 | -0.219 | 9.79E-04 | 1.31E-08 | -0.275 |
| cg20326704 | 10 | 70321770  | TET1     | 5'UTR/1st intron | S_Shore | 0.366±0.101 | 0.584±0.221 | -0.218 | 2.08E-03 | 1.17E-09 | -0.294 |
| cg03059018 | 14 | 61190965  | SIX4     | TSS200           | S_Shore | 0.122±0.14  | 0.34±0.262  | -0.218 | 1.13E-02 | 4.67E-06 | -0.223 |
| cg15523958 | 2  | 43864929  | PLEKHH2  | 5'UTR/1st intron | Island  | 0.307±0.118 | 0.525±0.138 | -0.218 | 8.50E-04 | 2.99E-09 | -0.287 |
| cg22245273 | 19 | 4302448   | TMIGD2   | TSS200           | N_Shelf | 0.451±0.12  | 0.669±0.104 | -0.218 | 8.04E-04 | 7.69E-12 | -0.329 |
| cg15743533 | 20 | 815345    | FAM110A  | 5'UTR/1st intron | S_Shore | 0.45±0.158  | 0.668±0.157 | -0.218 | 6.03E-03 | 1.45E-26 | -0.493 |
| cg20717612 | 12 | 21810983  | LDHB     | TSS1500          | S_Shore | 0.357±0.07  | 0.575±0.177 | -0.218 | 1.51E-04 | 4.24E-13 | -0.347 |
| cg20064928 | 10 | 70586817  | STOX1    | TSS1500          | N_Shore | 0.102±0.078 | 0.319±0.15  | -0.218 | 6.63E-05 | 5.53E-09 | -0.282 |
| cg01294686 | 1  | 26606093  | SH3BGRL3 | TSS200           | N_Shore | 0.273±0.13  | 0.491±0.198 | -0.218 | 3.31E-03 | 1.10E-12 | -0.341 |
| cg05337743 | 19 | 54369571  | MYADM    | 5'UTR/1st exon   | N_Shelf | 0.44±0.104  | 0.658±0.081 | -0.218 | 2.65E-04 | 2.19E-10 | -0.306 |
| cg06340276 | 4  | 89204787  | PPM1K    | 5'UTR/1st intron | N_Shore | 0.146±0.134 | 0.364±0.208 | -0.218 | 4.52E-03 | 5.04E-08 | -0.264 |
| cg27457191 | 7  | 77429766  | PHTF2    | 5'UTR/1st intron | S_Shore | 0.618±0.097 | 0.835±0.039 | -0.217 | 2.90E-04 | 7.36E-12 | -0.329 |
| cg15955046 | 2  | 3643682   | COLEC11  | 5'UTR/1st intron | S_Shore | 0.428±0.058 | 0.646±0.084 | -0.217 | 2.99E-07 | 1.30E-17 | -0.404 |
| cg14667273 | 1  | 1369934   | VWA1     | TSS1500          | N_Shore | 0.412±0.074 | 0.629±0.077 | -0.217 | 8.05E-06 | 3.79E-15 | -0.374 |
| cg13545212 | 17 | 6617192   | SLC13A5  | TSS1500          | Island  | 0.464±0.109 | 0.681±0.103 | -0.217 | 3.66E-04 | 3.01E-07 | -0.249 |
| cg14462645 | 6  | 52226698  | PAQR8    | TSS1500          | N_Shore | 0.482±0.12  | 0.699±0.087 | -0.217 | 8.85E-04 | 7.40E-10 | -0.297 |
| cg26653147 | 15 | 71146819  | LARP6    | TSS1500          | Island  | 0.212±0.13  | 0.429±0.218 | -0.217 | 4.69E-03 | 8.57E-11 | -0.313 |
| cg06437004 | 12 | 21810458  | LDHB     | 5'UTR/1st exon   | N_Shore | 0.358±0.121 | 0.575±0.126 | -0.217 | 9.52E-04 | 9.69E-17 | -0.394 |
| cg26537639 | 16 | 88717374  | CYBA     | 1st exon         | Island  | 0.568±0.104 | 0.784±0.036 | -0.217 | 4.88E-04 | 3.04E-43 | -0.609 |
| cg00920691 | 19 | 12075601  | ZNF763   | TSS1500          | N_Shore | 0.317±0.118 | 0.534±0.228 | -0.217 | 4.06E-03 | 1.85E-22 | -0.455 |
| cg24709033 | 7  | 2724568   | HOXA11   | 1st exon         | N_Shore | 0.517±0.113 | 0.733±0.101 | -0.217 | 5.36E-04 | 2.81E-07 | -0.250 |
| cg02283238 | 5  | 118691126 | TNFAIP8  | 5'UTR            | N_Shore | 0.619±0.117 | 0.836±0.032 | -0.217 | 1.11E-03 | 5.70E-26 | -0.487 |
| cg05776388 | 17 | 72983414  | CDR2L    | TSS1500          | N_Shore | 0.32±0.159  | 0.536±0.211 | -0.216 | 1.01E-02 | 4.21E-06 | -0.224 |
| cg21487207 | 12 | 54410576  | HOXC6    | TSS200           | S_Shore | 0.172±0.095 | 0.388±0.205 | -0.216 | 1.22E-03 | 1.21E-05 | -0.214 |
| cg26043257 | 4  | 15780238  | CD38     | 1st exon         | Island  | 0.318±0.221 | 0.534±0.21  | -0.216 | 3.61E-02 | 1.53E-05 | -0.211 |
| cg22070243 | 2  | 172378774 | CYBRD1   | 5'UTR/1st exon   | N_Shore | 0.19±0.13   | 0.406±0.275 | -0.216 | 1.21E-02 | 1.13E-10 | -0.311 |
| cg27365208 | 19 | 19778986  | ZNF101   | 5'UTR/1st exon   | N_Shore | 0.496±0.097 | 0.712±0.041 | -0.216 | 2.76E-04 | 1.14E-09 | -0.294 |
| cg22289360 | 9  | 79073908  | GCNT1    | 5'UTR/1st intron | Island  | 0.412±0.078 | 0.628±0.146 | -0.216 | 5.98E-05 | 1.43E-07 | -0.256 |
| cg24437535 | 1  | 150121441 | PLEKHO1  | TSS1500          | N_Shore | 0.439±0.119 | 0.655±0.151 | -0.216 | 1.13E-03 | 1.45E-09 | -0.292 |
| cg00244040 | 14 | 61788914  | PRKCH    | 1st exon         | Island  | 0.33±0.11   | 0.546±0.148 | -0.216 | 6.53E-04 | 5.26E-07 | -0.244 |
| cg17276021 | 1  | 16084445  | FBLM1    | 5'UTR/1st intron | N_Shore | 0.436±0.115 | 0.652±0.148 | -0.215 | 8.68E-04 | 4.59E-25 | -0.479 |
| cg01122251 | 10 | 14995625  | SHCLRE1C | 5'UTR/1st intron | N_Shore | 0.141±0.136 | 0.356±0.302 | -0.215 | 1.93E-02 | 7.92E-24 | -0.468 |
| cg26998044 | 17 | 8869155   | PIK3R5   | TSS200           | Island  | 0.287±0.194 | 0.502±0.211 | -0.215 | 2.30E-02 | 3.51E-05 | -0.202 |
| cg24366657 | 11 | 2160932   | IGF2     | 5'UTR            | Island  | 0.471±0.064 | 0.686±0.173 | -0.215 | 1.14E-04 | 1.13E-19 | -0.427 |
| cg04263436 | 6  | 33245467  | B3GALT4  | 1st exon         | Island  | 0.61±0.095  | 0.825±0.051 | -0.215 | 2.19E-04 | 2.21E-22 | -0.454 |
| cg01735277 | 15 | 75077691  | CSK      | 5'UTR            | S_Shelf | 0.598±0.141 | 0.813±0.059 | -0.215 | 3.13E-03 | 5.92E-22 | -0.450 |
| cg13755546 | 2  | 74425580  | MTHFD2   | TSS200           | Island  | 0.402±0.191 | 0.617±0.16  | -0.215 | 1.70E-02 | 4.06E-27 | -0.497 |
| cg01857475 | 12 | 104697193 | EID3     | TSS1500          | N_Shore | 0.296±0.179 | 0.511±0.265 | -0.215 | 2.57E-02 | 2.15E-11 | -0.322 |
| cg26134147 | 14 | 24036908  | APIG2    | 5'UTR/1st exon   | Island  | 0.135±0.033 | 0.35±0.227  | -0.215 | 9.57E-04 | 5.58E-14 | -0.359 |
| cg17355191 | 9  | 136039576 | GBGT1    | TSS1500          | Island  | 0.552±0.169 | 0.767±0.088 | -0.215 | 8.13E-03 | 9.82E-28 | -0.502 |
| cg21270243 | 2  | 216176248 | ATIC     | TSS1500          | N_Shore | 0.06±0.057  | 0.275±0.284 | -0.215 | 6.03E-03 | 5.99E-11 | -0.315 |
| cg16864139 | 2  | 43864212  | PLEKHH2  | TSS1500          | N_Shore | 0.11±0.118  | 0.325±0.197 | -0.215 | 2.41E-03 | 5.44E-06 | -0.222 |
| cg27262236 | 20 | 55965077  | RBM38    | TSS1500          | S_Shore | 0.305±0.183 | 0.519±0.181 | -0.215 | 1.57E-02 | 8.47E-07 | -0.240 |
| cg02397514 | 1  | 935139    | HES4     | 1st exon         | Island  | 0.115±0.162 | 0.33±0.25   | -0.215 | 1.65E-02 | 7.96E-06 | -0.218 |
| cg17957827 | 17 | 79895524  | PYCR1    | TSS1500          | N_Shelf | 0.16±0.139  | 0.374±0.229 | -0.215 | 7.75E-03 | 1.13E-11 | -0.326 |
| cg15957394 | 4  | 7941823   | AFAP1    | TSS200           | Island  | 0.36±0.194  | 0.575±0.273 | -0.214 | 3.44E-02 | 2.55E-18 | -0.412 |
| cg17644557 | 6  | 86159103  | NT5E     | TSS200           | N_Shore | 0.272±0.112 | 0.487±0.213 | -0.214 | 2.73E-03 | 3.22E-08 | -0.268 |
| cg15073853 | 19 | 18549131  | ISYNA1   | TSS1500          | Island  | 0.471±0.154 | 0.685±0.062 | -0.214 | 5.22E-03 | 4.99E-21 | -0.441 |
| cg26090107 | 11 | 60718882  | SLC15A3  | 1st exon         | Island  | 0.325±0.211 | 0.539±0.204 | -0.214 | 3.12E-02 | 2.04E-05 | -0.208 |
| cg16289449 | 11 | 63974162  | FERMT3   | 5'UTR/1st exon   | N_Shore | 0.431±0.106 | 0.645±0.051 | -0.214 | 5.19E-04 | 2.56E-44 | -0.616 |
| cg05693489 | 6  | 32813441  | PSMB8    | TSS1500          | S_Shore | 0.469±0.119 | 0.683±0.059 | -0.214 | 1.09E-03 | 1.15E-17 | -0.405 |
| cg20826709 | 11 | 67171145  | TBC1D10C | TSS1500          | S_Shelf | 0.556±0.098 | 0.769±0.052 | -0.214 | 2.85E    |          |        |

|             |    |           |           |                  |         |             |             |        |          |          |        |
|-------------|----|-----------|-----------|------------------|---------|-------------|-------------|--------|----------|----------|--------|
| cg16541026  | 3  | 49026934  | P4HTM     | TSS1500          | N_Shore | 0.362±0.103 | 0.575±0.169 | -0.214 | 6.80E-04 | 2.57E-12 | -0.336 |
| cg03549705  | 16 | 29674618  | SPN       | 5'UTR/1st exon   | N_Shore | 0.608±0.103 | 0.822±0.035 | -0.214 | 4.94E-04 | 4.69E-37 | -0.571 |
| cg13634319  | 12 | 56323727  | DGKA      | TSS1500          | S_Shelf | 0.525±0.141 | 0.739±0.081 | -0.214 | 2.95E-03 | 6.62E-11 | -0.314 |
| cg24859158  | 1  | 26605913  | SH3BGR13  | TSS1500          | N_Shore | 0.436±0.107 | 0.649±0.077 | -0.214 | 4.07E-04 | 2.12E-17 | -0.402 |
| cg11530914  | 16 | 67281528  | FHOD1     | TSS200           | Island  | 0.16±0.096  | 0.373±0.201 | -0.214 | 1.25E-03 | 1.71E-06 | -0.233 |
| cg18198306  | 6  | 153303350 | FBXO5     | 5'UTR/1st intron | N_Shore | 0.177±0.108 | 0.391±0.225 | -0.214 | 3.30E-03 | 1.59E-07 | -0.255 |
| cg21333861  | 6  | 33244976  | B3GALT4   | 5'UTR/1st exon   | Island  | 0.513±0.203 | 0.727±0.081 | -0.213 | 2.07E-02 | 6.48E-57 | -0.679 |
| cg19269039  | 1  | 11743200  | DENND2D   | 5'UTR/1st exon   | N_Shelf | 0.566±0.061 | 0.779±0.085 | -0.213 | 7.63E-07 | 1.54E-37 | -0.574 |
| cg24890054  | 2  | 18059752  | KCNS3     | 5'UTR/1st intron | Island  | 0.158±0.181 | 0.371±0.272 | -0.213 | 2.91E-02 | 6.42E-09 | -0.281 |
| cg20250722  | 6  | 26522136  | HCG11     | 1st exon         | Island  | 0.511±0.107 | 0.724±0.039 | -0.213 | 6.33E-04 | 3.01E-41 | -0.598 |
| cg20299703  | 1  | 65731886  | DNAIC6    | 5'UTR/1st intron | S_Shore | 0.399±0.129 | 0.612±0.265 | -0.213 | 1.12E-02 | 1.52E-08 | -0.274 |
| cg03719155  | 19 | 11689880  | ACP5      | TSS1500          | S_Shore | 0.451±0.101 | 0.664±0.193 | -0.213 | 1.23E-03 | 1.90E-26 | -0.492 |
| cg27039625  | 6  | 86159096  | NT5E      | TSS1500          | N_Shore | 0.353±0.128 | 0.566±0.189 | -0.213 | 3.28E-03 | 1.11E-10 | -0.311 |
| cg03947026  | 1  | 52832320  | CC2D1B    | TSS1500          | S_Shore | 0.286±0.124 | 0.498±0.192 | -0.213 | 2.92E-03 | 4.20E-06 | -0.224 |
| cg25998680  | 6  | 43044239  | PTK7      | 1st exon         | Island  | 0.442±0.174 | 0.654±0.068 | -0.212 | 1.03E-02 | 4.41E-20 | -0.431 |
| cg13191049  | 15 | 99645663  | SYNM      | 1st exon         | Island  | 0.453±0.185 | 0.665±0.101 | -0.212 | 1.39E-02 | 6.82E-16 | -0.384 |
| cg09118312  | 12 | 21810630  | LDHB      | 5'UTR/1st exon   | Island  | 0.374±0.185 | 0.586±0.207 | -0.212 | 2.03E-02 | 5.10E-12 | -0.331 |
| cg01131866  | 5  | 61601529  | KIF2A     | TSS1500          | N_Shore | 0.271±0.091 | 0.483±0.132 | -0.212 | 1.44E-04 | 3.29E-06 | -0.227 |
| cg16681526  | 1  | 6526469   | TNFRSF25  | TSS1500          | S_Shore | 0.547±0.129 | 0.759±0.093 | -0.212 | 1.70E-03 | 3.03E-19 | -0.422 |
| cg05417285  | 12 | 117176367 | RNF72     | 5'UTR/1st intron | Island  | 0.116±0.128 | 0.328±0.242 | -0.212 | 7.92E-03 | 4.83E-06 | -0.223 |
| cg05832051  | 19 | 54369469  | MYADM     | 5'UTR/1st exon   | N_Shelf | 0.522±0.096 | 0.734±0.07  | -0.212 | 1.90E-04 | 2.67E-12 | -0.336 |
| cg25885803  | 11 | 47290281  | MADD      | TSS1500          | N_Shore | 0.394±0.096 | 0.606±0.092 | -0.212 | 1.52E-04 | 2.49E-05 | -0.206 |
| cg20780880  | 6  | 8103084   | EEF1E1    | TSS1500          | S_Shore | 0.416±0.139 | 0.628±0.211 | -0.212 | 6.70E-03 | 1.80E-07 | -0.254 |
| cg00618865  | 3  | 129324699 | PLXND1    | 1st exon         | Island  | 0.268±0.156 | 0.48±0.19   | -0.212 | 8.82E-03 | 2.92E-08 | -0.269 |
| cg03189210  | 6  | 33245474  | B3GALT4   | 1st exon         | Island  | 0.524±0.094 | 0.735±0.06  | -0.212 | 1.82E-04 | 3.06E-20 | -0.433 |
| cg09300114  | 17 | 73084329  | SLC16A5   | 5'UTR/1st intron | Island  | 0.62±0.092  | 0.832±0.038 | -0.211 | 2.20E-04 | 2.88E-27 | -0.499 |
| cg27583010  | 16 | 30198505  | LOC606724 | TSS1500          | S_Shelf | 0.36±0.151  | 0.572±0.261 | -0.211 | 1.66E-02 | 7.83E-06 | -0.218 |
| cg12065285  | 1  | 155946346 | ARHGEF2   | 5'UTR/1st intron | N_Shore | 0.357±0.123 | 0.569±0.153 | -0.211 | 1.71E-03 | 2.48E-43 | -0.610 |
| cg13528854  | 4  | 15704795  | BST1      | 1st exon         | Island  | 0.378±0.159 | 0.589±0.118 | -0.211 | 6.69E-03 | 3.74E-30 | -0.522 |
| cg06737981  | 22 | 23523942  | BCR       | 1st exon         | Island  | 0.535±0.072 | 0.746±0.063 | -0.211 | 5.14E-05 | 1.38E-11 | -0.325 |
| cg00337466  | 10 | 135090565 | ADAM8     | TSS200           | S_Shore | 0.473±0.071 | 0.684±0.065 | -0.211 | 9.23E-06 | 2.16E-09 | -0.289 |
| cg12297409  | 10 | 44101714  | ZNF485    | TSS200           | N_Shore | 0.327±0.086 | 0.538±0.164 | -0.211 | 2.64E-04 | 1.40E-05 | -0.212 |
| cg04566159  | 19 | 11689715  | ACP5      | 5'UTR/1st exon   | Island  | 0.433±0.129 | 0.644±0.165 | -0.211 | 2.61E-03 | 5.25E-25 | -0.479 |
| cg00236576  | 17 | 81039406  | METRNL    | 5'UTR/1st intron | Island  | 0.379±0.112 | 0.59±0.119  | -0.211 | 6.20E-04 | 1.01E-06 | -0.238 |
| cg00516222  | 17 | 27949795  | CORO6     | TSS1500          | Island  | 0.431±0.186 | 0.642±0.188 | -0.211 | 1.91E-02 | 7.29E-07 | -0.241 |
| cg17001399  | 14 | 61191008  | SIX4      | TSS200           | S_Shore | 0.083±0.1   | 0.294±0.239 | -0.211 | 4.10E-03 | 3.93E-05 | -0.201 |
| cg15379633  | 22 | 23487586  | RAB36     | 1st exon         | Island  | 0.5±0.138   | 0.711±0.075 | -0.211 | 2.88E-03 | 4.58E-14 | -0.360 |
| cg26922780  | 16 | 88769443  | RNF166    | 5'UTR/1st exon   | N_Shelf | 0.675±0.081 | 0.886±0.056 | -0.211 | 5.16E-05 | 6.99E-14 | -0.358 |
| cg17416730  | 6  | 33245541  | B3GALT4   | 1st exon         | Island  | 0.484±0.094 | 0.694±0.045 | -0.211 | 2.57E-04 | 6.48E-26 | -0.487 |
| cg17319374  | 2  | 135476880 | TMEM163   | TSS1500          | Island  | 0.314±0.196 | 0.525±0.138 | -0.211 | 2.02E-02 | 4.46E-07 | -0.246 |
| cg22963915  | 19 | 3785855   | MATK      | 5'UTR/1st intron | Island  | 0.248±0.171 | 0.459±0.225 | -0.211 | 1.77E-02 | 1.14E-07 | -0.258 |
| cg15695852  | 2  | 43864466  | PLEKHH2   | 5'UTR/1st exon   | Island  | 0.101±0.122 | 0.311±0.244 | -0.210 | 7.43E-03 | 8.07E-06 | -0.218 |
| cg10167849  | 6  | 34206152  | HMGAI1    | 5'UTR            | Island  | 0.268±0.151 | 0.478±0.185 | -0.210 | 7.49E-03 | 4.20E-40 | -0.591 |
| cg007759394 | 11 | 134201954 | GLB1L2    | 5'UTR/1st exon   | Island  | 0.458±0.223 | 0.668±0.205 | -0.210 | 4.11E-02 | 3.37E-08 | -0.268 |
| cg00353923  | 7  | 127671044 | LRRC4     | TSS200           | N_Shore | 0.61±0.058  | 0.82±0.04   | -0.210 | 2.71E-06 | 1.36E-21 | -0.447 |
| cg18856652  | 2  | 43864913  | PLEKHH2   | 5'UTR/1st intron | Island  | 0.278±0.137 | 0.488±0.214 | -0.210 | 6.90E-03 | 2.49E-08 | -0.270 |
| cg19759135  | 5  | 179221059 | LTC4S     | 5'UTR/1st exon   | N_Shore | 0.576±0.092 | 0.786±0.056 | -0.210 | 1.66E-04 | 6.77E-13 | -0.344 |
| cg08335767  | 6  | 34206495  | HMGAI1    | 5'UTR            | S_Shore | 0.339±0.089 | 0.548±0.118 | -0.210 | 9.79E-05 | 6.76E-32 | -0.535 |
| cg23373626  | 5  | 141031295 | FCHSD1    | TSS1500          | S_Shore | 0.265±0.137 | 0.474±0.246 | -0.210 | 1.09E-02 | 3.53E-26 | -0.489 |
| cg00113050  | 10 | 102756314 | LZTS2     | TSS1500          | N_Shore | 0.163±0.056 | 0.373±0.187 | -0.209 | 2.52E-04 | 9.62E-13 | -0.342 |
| cg20792833  | 11 | 67205195  | PTPRCAP   | TSS200           | S_Shore | 0.582±0.107 | 0.791±0.047 | -0.209 | 6.45E-04 | 7.15E-49 | -0.640 |
| cg09039664  | 20 | 44034247  | DBNDD2    | TSS1500          | N_Shore | 0.289±0.086 | 0.498±0.108 | -0.209 | 6.37E-05 | 1.96E-09 | -0.290 |
| cg06741043  | 15 | 68871574  | CORO2B    | 5'UTR            | Island  | 0.269±0.163 | 0.478±0.16  | -0.209 | 9.37E-03 | 3.26E-06 | -0.227 |
| cg24776469  | 2  | 174219348 | CDC47     | TSS1500          | N_Shore | 0.278±0.117 | 0.487±0.215 | -0.209 | 4.07E-03 | 1.39E-13 | -0.354 |
| cg11205006  | 22 | 26875499  | HPS4      | 1st exon         | N_Shelf | 0.375±0.163 | 0.583±0.239 | -0.209 | 1.78E-02 | 4.87E-06 | -0.223 |
| cg03465499  | 11 | 68781279  | MRGPRF    | TSS1500          | S_Shelf | 0.578±0.089 | 0.786±0.062 | -0.208 | 1.28E-04 | 1.25E-11 | -0.326 |
| cg27274542  | 20 | 57267680  | NPEPL1    | TSS200           | Island  | 0.322±0.109 | 0.531±0.207 | -0.208 | 2.74E-03 | 6.40E-16 | -0.384 |
| cg20001829  | 11 | 118402342 | TMEM25    | 5'UTR/1st intron | S_Shore | 0.275±0.195 | 0.483±0.235 | -0.208 | 3.16E-02 | 5.92E-38 | -0.577 |
| cg25589890  | 6  | 150284777 | ULBP1     | TSS1500          | Island  | 0.27±0.223  | 0.478±0.181 | -0.208 | 3.97E-02 | 5.73E-06 | -0.221 |
| cg03946762  | 12 | 54785043  | ZNF385A   | 5'UTR/1st exon   | Island  | 0.559±0.094 | 0.767±0.039 | -0.208 | 2.92E-04 | 5.83E-09 | -0.282 |
| cg12314713  | 17 | 47074576  | IGF2BP1   | TSS200           | Island  | 0.231±0.119 | 0.439±0.279 | -0.208 | 1.38E-02 | 1.49E-05 | -0.212 |
| cg11104418  | 17 | 76125211  | TMC6      | 5'UTR/1st intron | N_Shelf | 0.063±0.081 | 0.271±0.25  | -0.208 | 4.30E-03 | 9.29E-07 | -0.239 |
| cg23985447  | 5  | 118691066 | TNFAIP8   | 5'UTR            | N_Shore | 0.487±0.116 | 0.694±0.124 | -0.208 | 9.68E-04 | 1.67E-22 | -0.456 |
| cg04738224  | 19 | 15618961  | CYP4F22   | TSS1500          | N_Shore | 0.386±0.071 | 0.593±0.155 | -0.207 | 9.81E-05 | 1.17E-12 | -0.341 |
| cg06945399  | 7  | 127671195 | LRRC4     | TSS200           | Island  | 0.438±0.078 | 0.645±0.063 | -0.207 | 3.45E-05 | 1.69E-15 | -0.379 |
| cg18132212  | 4  | 40751843  | NSUN7     | TSS200           | N_Shore | 0.383±0.135 | 0.59±0.12   | -0.207 | 2.81E-03 | 1.05E-23 | -0.467 |
| cg03004599  | 9  | 114937770 | SUSD1     | TSS200           | Island  | 0.273±0.159 | 0.48±0.231  | -0.207 | 1.59E-02 | 6.81E-18 | -0.407 |
| cg06800301  | 1  | 16766912  | NECAP2    | TSS1500          | N_Shore | 0.372±0.077 | 0.579±0.102 | -0.207 | 2.28E-05 | 8.37E-07 | -0.240 |
| cg13675837  | 17 | 54910204  | DGKE      | TSS1500          | N_Shore | 0.492±0.116 | 0.698±0.15  | -0.207 | 1.30E-03 | 1.14E-22 | -0.457 |
| cg16013543  | 1  | 154300241 | ATP8B2    | 5'UTR/1st intron | N_Shore | 0.531±0.082 | 0.738±0.047 | -0.207 | 8.92E-05 | 1.88E-11 | -0.323 |
| cg09025324  | 6  | 116691685 | DSE       | 5'UTR            | N_Shore | 0.518±0.097 | 0.724±0.159 | -0.207 | 5.29E-04 | 6.48E-23 | -0.460 |
| cg16832267  | 2  | 18060102  | KCNS3     | 5'UTR/1st intron | Island  | 0.184±0.191 | 0.39±0.281  | -0.206 | 4.11E-02 | 1.84E-08 | -0.273 |
| cg25826226  | 15 | 41953061  | MGA       | 5'UTR/1st intron | N_Shore | 0.321±0.154 | 0.528±0.146 | -0.206 | 6.88E-03 | 4.14E-08 | -0.266 |
| cg13628514  | 12 | 110271439 | TRPV4     | TSS1500          | Island  | 0.441±0.068 | 0.648±0.121 | -0.206 | 1.43E-05 | 1.59E-18 | -0.414 |
| cg07397616  | 22 | 38035109  | SH3BP1    | TSS1500          | N_Shore | 0.464±0.121 | 0.67±0.146  | -0.206 | 1.71E-03 | 2.38E-27 | -0.499 |
| cg22105702  | 4  | 78978722  | FRAS1     | TSS200           | N_Shore | 0.126±0.107 | 0.332±0.226 | -0.206 | 4.32E-03 | 1.29E-07 | -0.257 |
| cg16013670  | 1  | 241804175 | OPN3      | TSS1500          | S_Shore | 0.626±0.181 | 0.832±0.112 | -0.206 | 1.49E-02 | 3.06E-23 | -0.463 |
| cg04994405  | 1  | 65731836  | DNAIC6    | 5'UTR/1st intron | Island  | 0.415±0.095 | 0.621±0.189 | -0.206 | 1.19E-03 | 4.14E-09 | -0.284 |
| cg19779810  | 17 | 39969264  | FKBP10    | 5'UTR/1st exon   | S_Shore | 0.419±0.158 | 0.624±0.141 | -0.206 | 8.08E-03 | 8.61E-22 | -0.449 |
| cg00032205  | 8  | 98290372  | TSPYL5    | TSS200           | Island  | 0.578±0.104 | 0.783±0.049 | -0.205 | 5.79E-04 | 3.29E-16 | -0.387 |
| cg22891070  | 19 | 46801642  | HIF3A     | 5'UTR/1st exon   | S_Shore | 0.609±0.18  | 0.814±0.081 | -0.205 | 1.44E-02 | 9.78E-07 | -0.238 |
| cg26751513  | 16 | 1542910   | TELO2     | TSS1500          | N_Shore | 0.576±0.11  | 0.781±0.073 | -0.205 | 7.46E-04 | 1.07E-05 | -0.215 |
| cg09059904  | 5  | 76012757  | F2R       | 5'UTR/1st intron | S_Shore | 0.429±0.125 | 0.635±0.182 | -0.205 | 3.39E-03 | 1.12E-07 | -0.258 |
| cg13894021  | 22 | 23487383  | RAB36     | TSS200           | Island  | 0.203±0.119 | 0.408±0.163 | -0.205 | 1.96E-03 | 6.56E-06 | -0.220 |
| cg02874942  | 19 | 11689649  | ACP5      | 5'UTR/1st intron | Island  | 0.309±0.174 | 0.515±0.235 | -0.205 | 2.31E-02 | 1.72E-16 | -0.391 |
| cg15366353  | 6  | 116691382 | DSE       | 5'UTR            | N_Shore | 0.486±0.084 | 0.692±0.126 | -0.205 | 9.12E-05 | 1.41E-21 | -0.446 |
| cg03001305  | 17 | 40439492  | STAT5A    | TSS1500          | N_Shore | 0.548±0.042 | 0.753±0.063 | -0.205 | 7.0      |          |        |

|            |    |           |          |                  |         |             |             |        |          |          |        |
|------------|----|-----------|----------|------------------|---------|-------------|-------------|--------|----------|----------|--------|
| cg24049629 | 3  | 50376475  | RASSF1   | 5'UTR/1st intron | S_Shore | 0.622±0.114 | 0.828±0.039 | -0.205 | 1.23E-03 | 3.61E-05 | -0.202 |
| cg15658426 | 5  | 114631545 | CCDC112  | 5'UTR/1st intron | N_Shore | 0.527±0.121 | 0.732±0.126 | -0.205 | 1.50E-03 | 5.62E-22 | -0.450 |
| cg14578363 | 17 | 42785078  | DBF4B    | TSS1500          | N_Shore | 0.695±0.132 | 0.9±0.025   | -0.205 | 3.14E-03 | 7.50E-09 | -0.280 |
| cg06479032 | 20 | 1246769   | SNPH     | TSS200           | Island  | 0.19±0.133  | 0.395±0.164 | -0.205 | 3.70E-03 | 7.92E-11 | -0.313 |
| cg07960067 | 2  | 9144629   | MBOAT2   | TSS1500          | Island  | 0.434±0.166 | 0.639±0.112 | -0.205 | 9.71E-03 | 1.78E-13 | -0.352 |
| cg13438834 | 22 | 45706530  | FAM118A  | 5'UTR            | Island  | 0.168±0.123 | 0.373±0.22  | -0.205 | 6.22E-03 | 2.53E-12 | -0.336 |
| cg12169661 | 7  | 73183394  | CLDN3    | 1st exon/3'UTR   | Island  | 0.41±0.123  | 0.615±0.196 | -0.205 | 3.99E-03 | 1.72E-16 | -0.391 |
| cg03999361 | 19 | 49436835  | DHDH     | TSS200           | Island  | 0.215±0.178 | 0.42±0.202  | -0.205 | 1.98E-02 | 2.19E-05 | -0.207 |
| cg26800162 | 12 | 21810808  | LDHB     | TSS200           | S_Shore | 0.265±0.189 | 0.469±0.254 | -0.205 | 3.48E-02 | 8.78E-08 | -0.260 |
| cg03452174 | 17 | 27045113  | RAB34    | 5'UTR/1st intron | N_Shore | 0.475±0.074 | 0.68±0.099  | -0.205 | 1.57E-05 | 5.71E-29 | -0.512 |
| cg00690082 | 17 | 40438511  | STAT5A   | TSS1500          | N_Shore | 0.552±0.083 | 0.756±0.063 | -0.205 | 7.50E-05 | 1.05E-18 | -0.416 |
| cg05432996 | 19 | 49244004  | RASIP1   | TSS200           | S_Shore | 0.624±0.098 | 0.829±0.064 | -0.205 | 3.24E-04 | 3.46E-09 | -0.286 |
| cg05444816 | 11 | 2162406   | IGF2     | 5'UTR            | Island  | 0.487±0.078 | 0.692±0.1   | -0.204 | 2.79E-05 | 2.88E-12 | -0.335 |
| cg14188111 | 1  | 153608034 | S100A13  | TSS1500          | S_Shore | 0.502±0.155 | 0.706±0.076 | -0.204 | 6.81E-03 | 8.08E-07 | -0.240 |
| cg20035459 | 16 | 3068707   | CLDN6    | TSS1500          | S_Shore | 0.576±0.127 | 0.78±0.035  | -0.204 | 2.43E-03 | 3.95E-11 | -0.318 |
| cg01667319 | 11 | 2161128   | IGF2     | 5'UTR            | Island  | 0.539±0.084 | 0.744±0.052 | -0.204 | 1.02E-04 | 1.61E-18 | -0.414 |
| cg26582768 | 10 | 102792043 | SFXN3    | 5'UTR/1st intron | S_Shelf | 0.247±0.18  | 0.451±0.254 | -0.204 | 3.06E-02 | 9.93E-09 | -0.278 |
| cg19759788 | 1  | 16084493  | FBLIM1   | 5'UTR/1st intron | N_Shore | 0.286±0.112 | 0.49±0.231  | -0.204 | 5.87E-03 | 4.67E-12 | -0.332 |
| cg06520331 | 10 | 93171002  | HECTD2   | 5'UTR/1st intron | S_Shore | 0.361±0.106 | 0.565±0.166 | -0.204 | 1.16E-03 | 3.76E-17 | -0.399 |
| cg02493211 | 11 | 118781633 | BCL9L    | TSS200           | Island  | 0.34±0.15   | 0.544±0.254 | -0.204 | 1.81E-02 | 4.37E-08 | -0.266 |
| cg00558804 | 16 | 88769761  | RNF166   | 5'UTR/1st exon   | N_Shelf | 0.602±0.12  | 0.806±0.049 | -0.204 | 1.66E-03 | 2.72E-09 | -0.288 |
| cg21769117 | 6  | 31705273  | CLIC1    | TSS1500          | N_Shelf | 0.503±0.073 | 0.707±0.12  | -0.204 | 2.58E-05 | 1.35E-32 | -0.540 |
| cg13999415 | 5  | 81047848  | SSBP2    | TSS1500          | Island  | 0.449±0.164 | 0.653±0.109 | -0.204 | 9.52E-03 | 4.48E-06 | -0.224 |
| cg23982858 | 12 | 95941869  | USP44    | 5'UTR/1st exon   | N_Shore | 0.387±0.139 | 0.591±0.156 | -0.204 | 4.68E-03 | 2.91E-07 | -0.249 |
| cg07302848 | 2  | 174219502 | CDCA7    | TSS200           | N_Shore | 0.332±0.141 | 0.536±0.205 | -0.204 | 8.44E-03 | 2.88E-16 | -0.388 |
| cg16882226 | 2  | 101034257 | CHST10   | TSS200           | Island  | 0.323±0.225 | 0.527±0.168 | -0.204 | 4.34E-02 | 1.09E-27 | -0.502 |
| cg09629657 | 5  | 179220795 | LTC4S    | TSS200           | N_Shore | 0.369±0.113 | 0.572±0.102 | -0.204 | 8.45E-04 | 4.46E-06 | -0.224 |
| cg06075311 | 10 | 105210937 | CALHM2   | 5'UTR            | N_Shore | 0.276±0.088 | 0.479±0.207 | -0.203 | 1.76E-03 | 1.78E-07 | -0.254 |
| cg17181653 | 6  | 144417537 | SF3B5    | TSS1500          | S_Shore | 0.508±0.179 | 0.711±0.181 | -0.203 | 1.89E-02 | 3.77E-06 | -0.226 |
| cg21667878 | 11 | 2160980   | IGF2     | 5'UTR            | Island  | 0.641±0.095 | 0.844±0.073 | -0.203 | 2.31E-04 | 1.28E-22 | -0.457 |
| cg11714334 | 22 | 39638092  | PDGFB    | TSS1500          | N_Shore | 0.159±0.061 | 0.362±0.223 | -0.203 | 1.75E-03 | 1.39E-06 | -0.235 |
| cg08412885 | 6  | 31649479  | LV6G5C   | TSS1500          | N_Shore | 0.433±0.148 | 0.636±0.141 | -0.203 | 6.10E-03 | 1.68E-05 | -0.210 |
| cg07149296 | 20 | 36889389  | KIAA1755 | TSS1500          | Island  | 0.444±0.209 | 0.647±0.152 | -0.203 | 3.22E-02 | 4.52E-08 | -0.265 |
| cg23327334 | 5  | 176855304 | GRK6     | 5'UTR/1st intron | S_Shore | 0.611±0.102 | 0.814±0.05  | -0.203 | 5.46E-04 | 2.20E-07 | -0.252 |
| cg00917251 | 1  | 24829987  | RCAN3    | 5'UTR/1st intron | S_Shore | 0.203±0.095 | 0.405±0.239 | -0.202 | 5.02E-03 | 2.59E-24 | -0.473 |
| cg13492227 | 17 | 7341436   | FGF11    | TSS1500          | N_Shore | 0.491±0.105 | 0.693±0.051 | -0.202 | 6.86E-04 | 1.99E-20 | -0.435 |
| cg06342490 | 2  | 42795193  | MTA3     | 5'UTR            | N_Shore | 0.628±0.13  | 0.83±0.027  | -0.202 | 3.06E-03 | 3.80E-19 | -0.421 |
| cg10181419 | 2  | 264120    | SH3YL1   | 1st exon         | Island  | 0.455±0.176 | 0.657±0.058 | -0.202 | 1.40E-02 | 1.03E-37 | -0.576 |
| cg00463982 | 16 | 1583984   | TMEM204  | 5'UTR            | Island  | 0.563±0.087 | 0.765±0.048 | -0.202 | 1.66E-04 | 2.86E-10 | -0.304 |
| cg04378886 | 19 | 50031395  | RCN3     | 5'UTR/1st intron | S_Shelf | 0.563±0.098 | 0.765±0.042 | -0.202 | 4.83E-04 | 1.65E-13 | -0.353 |
| cg15131282 | 2  | 233925030 | INPP5D   | 5'UTR/1st exon   | N_Shore | 0.301±0.15  | 0.502±0.17  | -0.202 | 8.14E-03 | 3.68E-10 | -0.302 |
| cg14064762 | 9  | 123688745 | TRAF1    | 5'UTR            | N_Shelf | 0.457±0.174 | 0.658±0.126 | -0.202 | 1.41E-02 | 3.64E-22 | -0.452 |
| cg10604168 | 15 | 65360370  | RASL12   | 5'UTR/1st exon   | Island  | 0.58±0.087  | 0.781±0.071 | -0.202 | 1.14E-04 | 1.86E-09 | -0.291 |
| cg01932734 | 3  | 50376409  | RASSF1   | 5'UTR/1st intron | S_Shore | 0.491±0.107 | 0.693±0.081 | -0.202 | 6.44E-04 | 2.13E-07 | -0.252 |
| cg09325164 | 1  | 32537942  | TMEM39B  | 5'UTR/1st exon   | N_Shore | 0.34±0.077  | 0.541±0.161 | -0.201 | 2.38E-04 | 1.35E-05 | -0.213 |
| cg08177833 | 16 | 88717537  | CYBA     | TSS200           | N_Shelf | 0.434±0.16  | 0.635±0.09  | -0.201 | 8.59E-03 | 3.01E-34 | -0.552 |
| cg07866131 | 15 | 41850280  | TYRO3    | TSS1500          | N_Shore | 0.192±0.111 | 0.394±0.142 | -0.201 | 1.13E-03 | 9.40E-15 | -0.369 |
| cg05095158 | 11 | 13030873  | RASSF10  | TSS200           | Island  | 0.468±0.114 | 0.669±0.118 | -0.201 | 1.11E-03 | 4.05E-06 | -0.225 |
| cg25107289 | 6  | 29760856  | HCG4     | TSS200           | Island  | 0.264±0.107 | 0.465±0.196 | -0.201 | 2.71E-03 | 6.07E-08 | -0.263 |
| cg23635429 | 15 | 116852470 | ATRN1    | TSS1500          | Island  | 0.223±0.14  | 0.424±0.271 | -0.201 | 2.04E-02 | 4.66E-11 | -0.317 |
| cg26980244 | 8  | 24772513  | NEFM     | 5'UTR/1st exon   | Island  | 0.471±0.155 | 0.671±0.109 | -0.201 | 7.55E-03 | 1.89E-09 | -0.290 |
| cg07638935 | 10 | 102821427 | KAZALD1  | 1st exon         | Island  | 0.327±0.16  | 0.527±0.234 | -0.201 | 1.99E-02 | 6.19E-36 | -0.564 |
| cg19734163 | 7  | 138720989 | ZC3HAV1L | TSS1500          | Island  | 0.377±0.193 | 0.578±0.216 | -0.201 | 3.24E-02 | 1.77E-19 | -0.425 |
| cg15331996 | 10 | 73848830  | SPOCK2   | TSS1500          | S_Shore | 0.571±0.113 | 0.771±0.086 | -0.201 | 9.87E-04 | 3.09E-09 | -0.287 |
| cg21039495 | 6  | 29760823  | HCG4     | 1st exon         | Island  | 0.061±0.067 | 0.262±0.245 | -0.201 | 4.07E-03 | 2.94E-08 | -0.269 |
| cg07075347 | 7  | 44104860  | PGAM2    | 1st exon         | Island  | 0.596±0.156 | 0.797±0.079 | -0.200 | 7.82E-03 | 2.71E-20 | -0.433 |
| cg09515953 | 19 | 38747355  | PPP1R14A | TSS200           | Island  | 0.469±0.113 | 0.669±0.062 | -0.200 | 1.14E-03 | 6.93E-06 | -0.219 |
| cg25246431 | 11 | 12398874  | PARVA    | TSS1500          | N_Shore | 0.401±0.158 | 0.601±0.202 | -0.200 | 1.42E-02 | 2.13E-07 | -0.252 |
| cg24543696 | 11 | 12031046  | DKK3     | TSS1500          | S_Shore | 0.474±0.148 | 0.675±0.14  | -0.200 | 6.65E-03 | 7.65E-10 | -0.297 |
| cg23668631 | 17 | 3796936   | CAMKK1   | TSS1500          | S_Shore | 0.417±0.062 | 0.617±0.117 | -0.200 | 8.27E-06 | 1.52E-05 | -0.211 |
| cg15508379 | 11 | 2162438   | IGF2     | 5'UTR            | Island  | 0.497±0.062 | 0.697±0.086 | -0.200 | 2.53E-06 | 1.02E-09 | -0.295 |
| cg12535569 | 11 | 67205291  | PTPRCAP  | TSS200           | S_Shore | 0.553±0.115 | 0.753±0.062 | -0.200 | 1.32E-03 | 1.80E-40 | -0.593 |
| cg10337079 | 11 | 2158697   | IGF2     | 5'UTR            | N_Shore | 0.183±0.078 | 0.383±0.157 | -0.200 | 2.34E-04 | 2.46E-12 | -0.336 |
| cg03734595 | 18 | 9333974   | TWSG1    | TSS1500          | N_Shore | 0.322±0.192 | 0.522±0.171 | -0.200 | 2.58E-02 | 4.35E-08 | -0.266 |
| cg05683808 | 7  | 157133186 | DNAJB6   | 5'UTR/1st intron | S_Shelf | 0.458±0.135 | 0.658±0.106 | -0.200 | 3.38E-03 | 9.05E-06 | -0.217 |
| cg01697163 | 22 | 38035301  | SH3BP1   | TSS1500          | N_Shore | 0.231±0.102 | 0.43±0.18   | -0.200 | 1.64E-03 | 5.40E-22 | -0.451 |
| cg23953820 | 6  | 30851051  | DDR1     | 5'UTR/1st intron | N_Shore | 0.664±0.19  | 0.864±0.015 | -0.200 | 2.05E-02 | 1.44E-45 | -0.622 |
| cg19002337 | 11 | 2160904   | IGF2     | 5'UTR            | Island  | 0.395±0.049 | 0.594±0.156 | -0.200 | 5.90E-05 | 1.94E-19 | -0.424 |
| cg00445824 | 19 | 18548929  | ISYNA1   | 1st exon         | Island  | 0.41±0.192  | 0.61±0.195  | -0.200 | 2.90E-02 | 1.84E-10 | -0.307 |
| cg21844450 | 20 | 8112956   | PLCB1    | 5'UTR/1st exon   | Island  | 0.1±0.139   | 0.299±0.255 | -0.200 | 1.71E-02 | 8.15E-09 | -0.279 |
| cg21306329 | 17 | 73083876  | SLC16A5  | 5'UTR/1st exon   | Island  | 0.587±0.062 | 0.786±0.052 | -0.200 | 5.16E-06 | 3.67E-24 | -0.471 |
| cg10289074 | 14 | 24682916  | CHMP4A   | TSS1500          | S_Shore | 0.312±0.137 | 0.512±0.107 | -0.200 | 3.81E-03 | 5.07E-17 | -0.397 |
| cg22669060 | 21 | 34774882  | IFNGR2   | TSS1500          | N_Shore | 0.578±0.119 | 0.777±0.059 | -0.200 | 1.70E-03 | 1.27E-10 | -0.310 |
| cg22326553 | 12 | 124155458 | TCTN2    | TSS1500          | N_Shore | 0.399±0.151 | 0.598±0.178 | -0.200 | 9.78E-03 | 5.88E-08 | -0.263 |
| cg03404662 | 9  | 114937740 | SUSD1    | TSS200           | Island  | 0.333±0.163 | 0.533±0.208 | -0.199 | 1.75E-02 | 5.39E-21 | -0.441 |
| cg21159568 | 7  | 2445331   | CHST12   | 5'UTR/1st intron | S_Shore | 0.64±0.123  | 0.839±0.043 | -0.199 | 2.22E-03 | 8.51E-12 | -0.328 |
| cg00219653 | 16 | 28937476  | RABEP2   | TSS1500          | S_Shore | 0.214±0.113 | 0.413±0.248 | -0.199 | 9.62E-03 | 9.79E-06 | -0.216 |
| cg09903090 | 6  | 41910019  | CCND3    | 5'UTR            | S_Shore | 0.174±0.144 | 0.373±0.2   | -0.199 | 9.94E-03 | 4.72E-07 | -0.245 |
| cg00930606 | 22 | 31740944  | PATZ1    | 1st exon         | N_Shore | 0.561±0.086 | 0.76±0.052  | -0.199 | 1.63E-04 | 2.33E-10 | -0.306 |
| cg12074545 | 3  | 44690014  | ZNF35    | TSS1500          | N_Shore | 0.508±0.14  | 0.707±0.205 | -0.199 | 9.45E-03 | 5.56E-14 | -0.359 |
| cg27541691 | 17 | 40811050  | TUBG2    | TSS1500          | N_Shore | 0.314±0.134 | 0.513±0.139 | -0.199 | 3.92E-03 | 2.22E-05 | -0.207 |
| cg04540406 | 16 | 46655675  | SHCBP1   | TSS1500          | S_Shore | 0.328±0.102 | 0.527±0.214 | -0.199 | 3.81E-03 | 9.09E-16 | -0.382 |
| cg14810385 | 20 | 25039658  | ACSS1    | TSS1500          | S_Shore | 0.475±0.158 | 0.673±0.166 | -0.198 | 1.12E-02 | 2.21E-06 | -0.231 |
| cg26394257 | 8  | 38964993  | ADAM32   | TSS200           | N_Shore | 0.537±0.124 | 0.736±0.134 | -0.198 | 2.36E-03 | 5.31E-08 | -0.264 |
| cg19209385 | 6  | 53659379  | LRRC1    | TSS1500          | Island  | 0.12±0.068  | 0.318±0.238 | -0.198 | 3.68E-03 | 2.74E-09 | -0.288 |
| cg13301014 | 19 | 38754768  | SPINT2   | TSS1500          | N_Shore | 0.395±0.162 | 0.593±0.087 | -0.198 | 9.93E-03 | 4.88E-17 | -0.397 |
| cg15832662 | 11 | 63448437  | RTN3     | TSS1500          | N_Shore | 0.221±0.103 | 0.419±0.215 | -0.198 | 4.14E-03 | 1.17E-15 | -0.381 |

|            |    |           |          |                  |         |             |             |        |          |          |        |
|------------|----|-----------|----------|------------------|---------|-------------|-------------|--------|----------|----------|--------|
| cg02075791 | 10 | 93174498  | HECTD2   | 5'UTR/1st intron | S_Shelf | 0.649±0.091 | 0.847±0.04  | -0.198 | 3.15E-04 | 1.76E-05 | -0.210 |
| cg21234561 | 12 | 104697526 | EID3     | 5'UTR/1st exon   | Island  | 0.339±0.201 | 0.536±0.189 | -0.198 | 3.54E-02 | 5.55E-14 | -0.359 |
| cg17922695 | 17 | 75451809  | SEPT9    | 5'UTR/1st intron | S_Shelf | 0.62±0.103  | 0.818±0.048 | -0.198 | 7.03E-04 | 2.11E-14 | -0.365 |
| cg07090813 | 1  | 120254330 | PHGDH    | TSS200           | N_Shore | 0.254±0.119 | 0.451±0.161 | -0.198 | 2.69E-03 | 1.76E-05 | -0.210 |
| cg17445812 | 3  | 36986805  | TRANK1   | TSS1500          | Island  | 0.462±0.161 | 0.659±0.098 | -0.197 | 9.90E-03 | 8.99E-06 | -0.217 |
| cg17491622 | 1  | 1369616   | VWA1     | TSS1500          | N_Shore | 0.417±0.098 | 0.614±0.067 | -0.197 | 4.21E-04 | 2.98E-10 | -0.304 |
| cg00937742 | 2  | 133429299 | LYPD1    | TSS1500          | S_Shore | 0.396±0.157 | 0.593±0.175 | -0.197 | 1.22E-02 | 1.12E-16 | -0.393 |
| cg24419391 | 7  | 73183516  | CLDN3    | 1st exon/3'UTR   | Island  | 0.522±0.153 | 0.72±0.223  | -0.197 | 1.69E-02 | 5.45E-20 | -0.430 |
| cg09456782 | 13 | 114146038 | TMCO3    | 5'UTR/1st intron | Island  | 0.392±0.167 | 0.589±0.214 | -0.197 | 2.14E-02 | 1.68E-17 | -0.403 |
| cg09456782 | 13 | 114146038 | DCUN1D2  | TSS1500          | Island  | 0.392±0.167 | 0.589±0.214 | -0.197 | 2.14E-02 | 8.03E-06 | -0.218 |
| cg25256924 | 11 | 67205739  | PTPRCAP  | TSS1500          | S_Shelf | 0.628±0.126 | 0.825±0.049 | -0.197 | 2.76E-03 | 6.12E-57 | -0.679 |
| cg00590036 | 6  | 158957433 | TMEM181  | TSS200           | Island  | 0.61±0.063  | 0.807±0.073 | -0.197 | 3.45E-06 | 1.47E-08 | -0.275 |
| cg24811864 | 18 | 55019711  | ST8SIA3  | TSS200           | Island  | 0.534±0.073 | 0.73±0.036  | -0.197 | 6.36E-05 | 1.01E-09 | -0.295 |
| cg26270195 | 6  | 33245553  | B3GALT4  | 1st exon         | Island  | 0.455±0.107 | 0.652±0.061 | -0.197 | 8.79E-04 | 9.08E-22 | -0.448 |
| cg06788514 | 16 | 88767261  | RNF166   | 5'UTR            | S_Shelf | 0.451±0.085 | 0.648±0.053 | -0.197 | 1.44E-04 | 1.58E-11 | -0.324 |
| cg16780688 | 8  | 120220073 | MAL2     | TSS1500          | N_Shore | 0.447±0.17  | 0.644±0.198 | -0.197 | 2.01E-02 | 7.57E-08 | -0.261 |
| cg23442853 | 3  | 122296488 | PARP15   | 5'UTR/1st exon   | N_Shore | 0.357±0.14  | 0.554±0.154 | -0.196 | 5.95E-03 | 3.08E-20 | -0.433 |
| cg02662658 | 17 | 34257571  | RDM1     | TSS1500          | N_Shore | 0.203±0.088 | 0.4±0.246   | -0.196 | 6.54E-03 | 1.59E-06 | -0.234 |
| cg11541601 | 8  | 22437870  | PDLIM2   | TSS200           | S_Shore | 0.359±0.137 | 0.555±0.203 | -0.196 | 9.30E-03 | 1.01E-05 | -0.216 |
| cg01850179 | 19 | 10340795  | S1PR2    | 5'UTR/1st intron | Island  | 0.262±0.109 | 0.458±0.214 | -0.196 | 5.16E-03 | 3.49E-13 | -0.348 |
| cg15720832 | 1  | 228291682 | C1orf35  | TSS1500          | N_Shelf | 0.441±0.153 | 0.637±0.246 | -0.196 | 2.22E-02 | 3.35E-06 | -0.227 |
| cg02943676 | 7  | 767474    | PRKAR1B  | TSS1500          | S_Shore | 0.121±0.082 | 0.317±0.176 | -0.196 | 7.28E-04 | 1.73E-08 | -0.273 |
| cg19586576 | 17 | 42906845  | GJC1     | 5'UTR/1st intron | Island  | 0.347±0.192 | 0.542±0.178 | -0.196 | 2.96E-02 | 4.78E-08 | -0.265 |
| cg17039022 | 1  | 203595145 | ATP2B4   | TSS1500          | N_Shelf | 0.201±0.151 | 0.397±0.241 | -0.196 | 2.04E-02 | 1.01E-05 | -0.216 |
| cg18470295 | 17 | 8868834   | PIK3R5   | 5'UTR/1st intron | Island  | 0.302±0.101 | 0.498±0.152 | -0.196 | 9.85E-04 | 4.77E-12 | -0.332 |
| cg18556834 | 14 | 24641070  | REC8     | TSS200           | Island  | 0.532±0.066 | 0.727±0.068 | -0.196 | 7.79E-06 | 1.76E-09 | -0.291 |
| cg11680055 | 1  | 110230252 | GSTM1    | TSS200           | Island  | 0.522±0.166 | 0.718±0.171 | -0.196 | 1.58E-02 | 1.40E-18 | -0.415 |
| cg02313495 | 15 | 40398007  | BMF      | 1st exon         | N_Shelf | 0.508±0.048 | 0.704±0.155 | -0.196 | 6.90E-05 | 7.50E-09 | -0.280 |
| cg13050240 | 14 | 24809068  | RIPK3    | 5'UTR/1st exon   | S_Shore | 0.415±0.136 | 0.611±0.097 | -0.195 | 4.02E-03 | 1.55E-41 | -0.599 |
| cg23092823 | 1  | 53528612  | PODN     | 5'UTR/1st intron | Island  | 0.466±0.07  | 0.661±0.092 | -0.195 | 1.31E-05 | 4.00E-14 | -0.361 |
| cg25371169 | 8  | 38757772  | PLEKHA2  | TSS1500          | N_Shore | 0.422±0.086 | 0.617±0.168 | -0.195 | 6.84E-04 | 1.08E-07 | -0.258 |
| cg11203985 | 16 | 89641054  | CPNE7    | TSS1500          | Island  | 0.406±0.106 | 0.602±0.12  | -0.195 | 8.19E-04 | 7.13E-07 | -0.241 |
| cg12136772 | 16 | 68481813  | SMPD3    | 5'UTR/1st intron | Island  | 0.422±0.098 | 0.617±0.155 | -0.195 | 8.74E-04 | 6.48E-07 | -0.242 |
| cg27619475 | 17 | 73083881  | SLC16A5  | 5'UTR/1st exon   | Island  | 0.519±0.084 | 0.714±0.042 | -0.195 | 1.85E-04 | 3.82E-27 | -0.497 |
| cg23676439 | 4  | 155663836 | LRAT     | 5'UTR/1st intron | S_Shore | 0.291±0.177 | 0.486±0.213 | -0.195 | 2.67E-02 | 5.40E-06 | -0.222 |
| cg18248284 | 19 | 13215151  | LYL1     | TSS1500          | N_Shore | 0.46±0.067  | 0.655±0.079 | -0.195 | 8.79E-06 | 1.66E-10 | -0.308 |
| cg13408152 | 3  | 120170474 | FSTL1    | TSS1500          | Island  | 0.512±0.074 | 0.707±0.066 | -0.195 | 4.77E-04 | 6.63E-06 | -0.221 |
| cg26480069 | 2  | 172378791 | CYBRD1   | 1st exon         | N_Shore | 0.15±0.129  | 0.345±0.276 | -0.195 | 2.19E-02 | 2.33E-08 | -0.271 |
| cg08951271 | 6  | 30850543  | DDR1     | 5'UTR/1st exon   | N_Shore | 0.564±0.176 | 0.759±0.131 | -0.195 | 1.75E-02 | 8.54E-22 | -0.449 |
| cg21579399 | 2  | 11890700  | LPIN1    | 5'UTR/1st intron | S_Shelf | 0.479±0.144 | 0.673±0.119 | -0.195 | 6.09E-03 | 3.48E-05 | -0.202 |
| cg13428480 | 1  | 160370208 | VANGL2   | TSS200           | Island  | 0.572±0.123 | 0.766±0.071 | -0.195 | 2.33E-03 | 2.47E-17 | -0.401 |
| cg11863717 | 10 | 73725041  | CHST3    | 5'UTR/1st intron | S_Shore | 0.312±0.172 | 0.506±0.259 | -0.195 | 3.51E-02 | 4.88E-07 | -0.245 |
| cg27165884 | 10 | 99473085  | MARVELD1 | TSS1500          | Island  | 0.545±0.079 | 0.74±0.132  | -0.195 | 1.31E-04 | 7.75E-42 | -0.601 |
| cg03108070 | 6  | 33245490  | B3GALT4  | 1st exon         | Island  | 0.596±0.08  | 0.79±0.059  | -0.194 | 8.28E-05 | 1.21E-13 | -0.354 |
| cg11600161 | 11 | 67171585  | TBC1D10C | 1st exon         | S_Shelf | 0.492±0.095 | 0.686±0.065 | -0.194 | 3.57E-04 | 3.87E-11 | -0.318 |
| cg08358392 | 6  | 130339410 | L3MBTL3  | TSS1500          | N_Shore | 0.554±0.116 | 0.748±0.158 | -0.194 | 2.51E-03 | 1.03E-11 | -0.327 |
| cg08599266 | 2  | 25142473  | ADCY3    | 5'UTR/1st intron | Island  | 0.215±0.13  | 0.409±0.196 | -0.194 | 7.57E-03 | 2.41E-06 | -0.230 |
| cg00505318 | 3  | 69130918  | UBA3     | TSS1500          | N_Shelf | 0.574±0.125 | 0.767±0.063 | -0.194 | 2.71E-03 | 3.43E-06 | -0.226 |
| cg10961604 | 1  | 27709771  | CD164L2  | 5'UTR/1st exon   | Island  | 0.468±0.201 | 0.661±0.228 | -0.194 | 4.59E-02 | 8.77E-06 | -0.217 |
| cg14989191 | 16 | 29912071  | SEZ6L2   | TSS1500          | N_Shore | 0.103±0.022 | 0.297±0.195 | -0.194 | 6.10E-04 | 1.44E-09 | -0.292 |
| cg14989191 | 16 | 29912071  | ASPHD1   | TSS200           | N_Shore | 0.103±0.022 | 0.297±0.195 | -0.194 | 6.10E-04 | 2.72E-07 | -0.250 |
| cg07549381 | 16 | 88769970  | RNF166   | 5'UTR/1st exon   | N_Shelf | 0.439±0.115 | 0.633±0.094 | -0.194 | 1.45E-03 | 1.82E-11 | -0.323 |
| cg20681068 | 20 | 3389535   | C2orf194 | TSS1500          | S_Shore | 0.075±0.053 | 0.268±0.251 | -0.193 | 5.48E-03 | 1.11E-06 | -0.237 |
| cg15128226 | 4  | 123747672 | FGF2     | TSS1500          | N_Shore | 0.544±0.117 | 0.737±0.149 | -0.193 | 2.42E-03 | 5.88E-06 | -0.221 |
| cg25032595 | 13 | 96204978  | CLDN10   | 5'UTR/1st exon   | Island  | 0.574±0.107 | 0.767±0.124 | -0.193 | 1.00E-03 | 7.11E-08 | -0.262 |
| cg23844623 | 11 | 47290730  | MADD     | TSS1500          | N_Shore | 0.121±0.12  | 0.314±0.196 | -0.193 | 5.62E-03 | 2.06E-08 | -0.272 |
| cg16341836 | 10 | 90641389  | STAMBP1  | 5'UTR/1st intron | S_Shore | 0.379±0.153 | 0.573±0.223 | -0.193 | 1.89E-02 | 1.51E-30 | -0.525 |
| cg17082634 | 15 | 41850503  | TYRO3    | TSS1500          | N_Shore | 0.341±0.103 | 0.534±0.141 | -0.193 | 9.78E-04 | 3.26E-13 | -0.349 |
| cg09459982 | 6  | 33386556  | SYNGAP1  | TSS1500          | S_Shore | 0.571±0.128 | 0.764±0.057 | -0.193 | 3.26E-03 | 1.58E-07 | -0.255 |
| cg16466899 | 7  | 23510693  | IGF2BP3  | TSS1500          | S_Shore | 0.071±0.026 | 0.263±0.205 | -0.193 | 9.87E-04 | 6.13E-07 | -0.243 |
| cg15951557 | 5  | 137610421 | GFR3     | TSS200           | S_Shore | 0.432±0.13  | 0.625±0.135 | -0.193 | 3.86E-03 | 1.24E-11 | -0.326 |
| cg16321975 | 2  | 233924852 | INPP5D   | 5'UTR/1st exon   | N_Shore | 0.381±0.142 | 0.574±0.155 | -0.193 | 7.43E-03 | 1.18E-16 | -0.393 |
| cg13118545 | 7  | 26191599  | NFE2L3   | TSS1500          | N_Shore | 0.264±0.204 | 0.457±0.203 | -0.193 | 4.33E-02 | 1.86E-13 | -0.352 |
| cg05723552 | 16 | 57026029  | NLRCS    | 5'UTR/1st intron | S_Shelf | 0.63±0.131  | 0.823±0.041 | -0.193 | 4.00E-03 | 1.49E-43 | -0.611 |
| cg00927554 | 12 | 95941920  | USP44    | 5'UTR/1st exon   | Island  | 0.472±0.162 | 0.665±0.162 | -0.193 | 1.45E-02 | 9.12E-10 | -0.296 |
| cg02102829 | 10 | 126849762 | CTBP2    | TSS1500          | Island  | 0.153±0.174 | 0.345±0.234 | -0.192 | 3.15E-02 | 4.47E-08 | -0.266 |
| cg03465320 | 6  | 32823078  | TAP1     | TSS1500          | S_Shore | 0.389±0.123 | 0.581±0.197 | -0.192 | 6.43E-03 | 4.09E-15 | -0.374 |
| cg02825887 | 9  | 34591041  | CNTFR    | TSS1500          | Island  | 0.248±0.124 | 0.44±0.217  | -0.192 | 9.27E-03 | 1.97E-12 | -0.337 |
| cg20970369 | 1  | 111744108 | DENND2D  | TSS1500          | N_Shelf | 0.387±0.079 | 0.579±0.13  | -0.192 | 1.42E-04 | 2.28E-19 | -0.424 |
| cg16990168 | 1  | 119526060 | TBX15    | 5'UTR/1st intron | N_Shelf | 0.597±0.12  | 0.789±0.072 | -0.192 | 2.15E-03 | 2.07E-05 | -0.208 |
| cg07277869 | 16 | 69760850  | NQO1     | TSS1500          | S_Shore | 0.227±0.114 | 0.419±0.225 | -0.192 | 8.46E-03 | 4.95E-25 | -0.479 |
| cg22162281 | 2  | 207139197 | ZDBF2    | TSS1500          | N_Shore | 0.395±0.184 | 0.587±0.216 | -0.192 | 3.40E-02 | 1.97E-13 | -0.352 |
| cg15468095 | 16 | 31214401  | PYCARD   | TSS1500          | S_Shore | 0.115±0.057 | 0.307±0.124 | -0.192 | 1.57E-05 | 3.00E-09 | -0.287 |
| cg15068733 | 17 | 7342846   | FGF11    | 5'UTR/1st exon   | Island  | 0.341±0.206 | 0.533±0.221 | -0.192 | 4.97E-02 | 9.81E-10 | -0.295 |
| cg24917382 | 11 | 2160953   | IGF2     | 5'UTR            | Island  | 0.553±0.081 | 0.745±0.058 | -0.192 | 1.09E-04 | 2.23E-20 | -0.434 |
| cg03703356 | 14 | 103989368 | CKB      | TSS200           | Island  | 0.242±0.088 | 0.434±0.223 | -0.191 | 4.55E-03 | 6.60E-06 | -0.220 |
| cg18404652 | 8  | 42009622  | AP3M2    | TSS1500          | N_Shore | 0.604±0.102 | 0.795±0.08  | -0.191 | 6.74E-04 | 3.14E-05 | -0.204 |
| cg20486569 | 22 | 19512228  | CLDN5    | 5'UTR/1st exon   | Island  | 0.468±0.088 | 0.659±0.177 | -0.191 | 1.26E-03 | 1.08E-05 | -0.215 |
| cg19295951 | 15 | 45421998  | DUOX1    | TSS200           | Island  | 0.622±0.086 | 0.813±0.059 | -0.191 | 1.96E-04 | 1.50E-06 | -0.234 |
| cg19295951 | 15 | 45421998  | DUOX1    | 5'UTR/1st exon   | Island  | 0.622±0.086 | 0.813±0.059 | -0.191 | 1.96E-04 | 1.86E-06 | -0.232 |
| cg03461967 | 17 | 27896173  | TP53I13  | 5'UTR            | S_Shore | 0.351±0.141 | 0.542±0.196 | -0.191 | 1.13E-02 | 1.93E-28 | -0.508 |
| cg18456459 | 18 | 9707753   | RAB31    | TSS1500          | Island  | 0.513±0.164 | 0.704±0.111 | -0.191 | 1.35E-02 | 2.69E-17 | -0.400 |
| cg20358834 | 11 | 66624256  | LRFN4    | TSS1500          | Island  | 0.486±0.131 | 0.677±0.122 | -0.191 | 4.03E-03 | 1.64E-20 | -0.436 |
| cg04075973 | 11 | 118781608 | BCL9L    | 5'UTR/1st exon   | Island  | 0.179±0.094 | 0.37±0.192  | -0.191 | 2.44E-03 | 9.38E-08 | -0.259 |
| cg16087457 | 17 | 73893198  | TRIM65   | TSS200           | Island  | 0.185±0.149 | 0.376±0.184 | -0.191 | 1.26E-02 | 3.30E-17 | -0.399 |
| cg06873218 | 22 | 39637727  | PDGFB    | TSS1500          | N_Shore | 0.453±0.095 | 0.644±0.199 | -0.191 | 2.98E-03 | 6.27E-11 | -0.315 |
| cg20465207 | 1  | 155948698 | ARHGEF2  | 5'UTR/1st intron | S_Shore | 0.182±0.1   |             |        |          |          |        |

|            |    |           |          |                  |         |             |             |        |          |          |        |
|------------|----|-----------|----------|------------------|---------|-------------|-------------|--------|----------|----------|--------|
| cg02442640 | 17 | 75451779  | SEPT9    | 5'UTR/1st intron | S_Shelf | 0.599±0.096 | 0.789±0.049 | -0.191 | 5.59E-04 | 7.05E-15 | -0.371 |
| cg24603490 | 12 | 47473995  | AMIGO2   | TSS1500          | Island  | 0.189±0.124 | 0.379±0.222 | -0.191 | 1.05E-02 | 1.43E-16 | -0.392 |
| cg02696067 | 6  | 30850977  | DDR1     | 5'UTR/1st intron | N_Shore | 0.533±0.167 | 0.724±0.123 | -0.191 | 1.51E-02 | 5.79E-24 | -0.469 |
| cg11547273 | 4  | 44728844  | GNPDA2   | TSS200           | S_Shore | 0.222±0.13  | 0.413±0.243 | -0.191 | 1.62E-02 | 1.29E-05 | -0.213 |
| cg23631538 | 1  | 111743537 | DENND2D  | TSS1500          | N_Shelf | 0.372±0.115 | 0.562±0.157 | -0.190 | 2.72E-03 | 2.83E-14 | -0.363 |
| cg23778596 | 7  | 149411498 | KRBA1    | TSS1500          | Island  | 0.326±0.215 | 0.516±0.143 | -0.190 | 4.54E-02 | 4.02E-11 | -0.318 |
| cg19371526 | 11 | 2161341   | IGF2     | 5'UTR            | Island  | 0.499±0.085 | 0.689±0.077 | -0.190 | 1.33E-04 | 8.13E-16 | -0.383 |
| cg22166739 | 11 | 73694868  | UCP2     | TSS1500          | S_Shore | 0.333±0.1   | 0.523±0.16  | -0.190 | 1.41E-03 | 4.22E-27 | -0.497 |
| cg01800926 | 1  | 9884565   | CLSTN1   | 5'UTR/1st exon   | Island  | 0.16±0.073  | 0.351±0.234 | -0.190 | 4.86E-03 | 2.30E-05 | -0.207 |
| cg07083464 | 7  | 27240758  | HOKA13   | TSS1500          | N_Shelf | 0.239±0.138 | 0.429±0.253 | -0.190 | 2.16E-02 | 5.29E-06 | -0.222 |
| cg17394649 | 6  | 29760164  | HCG4     | 1st exon         | Island  | 0.146±0.15  | 0.336±0.317 | -0.190 | 4.88E-02 | 4.32E-12 | -0.332 |
| cg11915650 | 11 | 2161009   | IGF2     | 5'UTR            | Island  | 0.475±0.115 | 0.665±0.104 | -0.190 | 1.64E-03 | 2.34E-15 | -0.377 |
| cg04879387 | 16 | 16043101  | ABCC1    | TSS1500          | N_Shore | 0.138±0.086 | 0.328±0.167 | -0.190 | 8.67E-04 | 6.92E-06 | -0.219 |
| cg03616357 | 4  | 156297942 | MAP9     | 5'UTR/1st exon   | Island  | 0.335±0.172 | 0.525±0.14  | -0.190 | 1.84E-02 | 1.29E-14 | -0.367 |
| cg00844376 | 10 | 99473557  | MARVELD1 | 5'UTR/1st exon   | S_Shore | 0.135±0.123 | 0.325±0.184 | -0.190 | 8.33E-03 | 3.69E-09 | -0.285 |
| cg01466741 | 5  | 134733519 | H2AFY    | 5'UTR/1st intron | N_Shore | 0.338±0.121 | 0.528±0.18  | -0.190 | 5.07E-03 | 7.30E-23 | -0.459 |
| cg15728256 | 1  | 402544184 | BMP8B    | 5'UTR/1st exon   | Island  | 0.418±0.15  | 0.608±0.159 | -0.190 | 1.09E-02 | 1.66E-13 | -0.353 |
| cg06147863 | 11 | 47400113  | SP11     | 5'UTR/1st exon   | S_Shore | 0.512±0.108 | 0.702±0.103 | -0.190 | 1.03E-03 | 1.67E-35 | -0.561 |
| cg14415844 | 14 | 91884659  | CCDC88C  | TSS1500          | S_Shore | 0.208±0.145 | 0.398±0.247 | -0.190 | 2.31E-02 | 1.00E-28 | -0.511 |
| cg08469255 | 6  | 30851069  | DDR1     | 5'UTR/1st intron | N_Shore | 0.679±0.201 | 0.869±0.032 | -0.190 | 3.24E-02 | 2.36E-43 | -0.610 |
| cg18660898 | 1  | 151030968 | CDC42SE1 | 5'UTR/1st intron | N_Shore | 0.348±0.16  | 0.538±0.206 | -0.189 | 2.10E-02 | 5.19E-17 | -0.397 |
| cg18660898 | 1  | 151030968 | MLLT11   | TSS1500          | N_Shore | 0.348±0.16  | 0.538±0.206 | -0.189 | 2.10E-02 | 2.24E-05 | -0.207 |
| cg02388253 | 9  | 123640363 | PHF19    | TSS1500          | S_Shore | 0.474±0.131 | 0.664±0.148 | -0.189 | 5.19E-03 | 7.69E-16 | -0.383 |
| cg20822579 | 14 | 24809073  | RIPK3    | 5'UTR/1st exon   | S_Shore | 0.436±0.133 | 0.625±0.078 | -0.189 | 4.36E-03 | 1.63E-43 | -0.611 |
| cg04305621 | 17 | 73084263  | SLC16A5  | 5'UTR/1st intron | Island  | 0.535±0.079 | 0.725±0.041 | -0.189 | 1.46E-04 | 3.14E-31 | -0.530 |
| cg19021197 | 17 | 59476212  | TBX2     | TSS1500          | Island  | 0.405±0.127 | 0.594±0.111 | -0.189 | 3.30E-03 | 3.30E-07 | -0.248 |
| cg17081976 | 2  | 24347010  | PFN4     | TSS1500          | S_Shore | 0.304±0.135 | 0.493±0.218 | -0.189 | 1.34E-02 | 8.40E-14 | -0.357 |
| cg08641278 | 10 | 73848764  | SPOCK2   | 5'UTR/1st exon   | S_Shore | 0.399±0.121 | 0.588±0.17  | -0.189 | 4.47E-03 | 4.16E-05 | -0.200 |
| cg03387723 | 1  | 41708464  | SCMH1    | TSS1500          | S_Shore | 0.623±0.149 | 0.812±0.098 | -0.189 | 8.38E-03 | 6.20E-09 | -0.281 |
| cg04811945 | 4  | 15779709  | CD38     | TSS200           | N_Shore | 0.572±0.129 | 0.761±0.144 | -0.189 | 4.60E-03 | 2.35E-17 | -0.401 |
| cg02652579 | 6  | 33386967  | SYNGAP1  | TSS1500          | S_Shore | 0.624±0.137 | 0.813±0.091 | -0.189 | 5.21E-03 | 4.23E-10 | -0.301 |
| cg16483840 | 6  | 32812953  | PSMB8    | TSS1500          | S_Shore | 0.427±0.122 | 0.616±0.138 | -0.189 | 3.21E-03 | 6.37E-26 | -0.487 |
| cg10856045 | 10 | 73848463  | SPOCK2   | 5'UTR/1st exon   | S_Shore | 0.308±0.102 | 0.497±0.147 | -0.189 | 1.27E-03 | 1.89E-05 | -0.209 |
| cg12120359 | 14 | 65006041  | HSPA2    | TSS1500          | N_Shore | 0.597±0.166 | 0.786±0.111 | -0.189 | 1.50E-02 | 4.19E-06 | -0.225 |
| cg07338698 | 17 | 79895532  | PYCR1    | TSS1500          | N_Shelf | 0.186±0.157 | 0.375±0.221 | -0.189 | 3.11E-02 | 1.25E-11 | -0.328 |
| cg02048416 | 2  | 74782684  | DOK1     | 5'UTR            | Island  | 0.439±0.088 | 0.627±0.162 | -0.189 | 8.85E-04 | 1.18E-10 | -0.311 |
| cg18741908 | 3  | 169756818 | GPR160   | 5'UTR            | Island  | 0.615±0.082 | 0.804±0.092 | -0.189 | 1.06E-04 | 2.20E-05 | -0.207 |
| cg26648103 | 11 | 66791718  | SYT12    | 5'UTR/1st intron | S_Shore | 0.292±0.087 | 0.481±0.137 | -0.189 | 3.95E-04 | 3.23E-23 | -0.462 |
| cg17317439 | 19 | 12075960  | ZNF763   | 5'UTR/1st exon   | N_Shore | 0.344±0.102 | 0.533±0.237 | -0.189 | 9.24E-03 | 4.26E-32 | -0.537 |
| cg05871694 | 2  | 177053503 | HOXD1    | 5'UTR/1st exon   | Island  | 0.357±0.105 | 0.545±0.214 | -0.189 | 6.21E-03 | 9.43E-07 | -0.239 |
| cg26886572 | 11 | 3009206   | NAP1L4   | 5'UTR/1st intron | N_Shelf | 0.594±0.107 | 0.783±0.139 | -0.189 | 1.50E-03 | 8.76E-07 | -0.239 |
| cg00759427 | 20 | 62708630  | RGS19    | 5'UTR/1st intron | N_Shelf | 0.598±0.098 | 0.786±0.056 | -0.188 | 6.63E-04 | 2.33E-08 | -0.271 |
| cg03529003 | 1  | 11994281  | PLOD1    | TSS1500          | N_Shore | 0.397±0.117 | 0.586±0.18  | -0.188 | 4.66E-03 | 9.67E-06 | -0.216 |
| cg15604242 | 19 | 11450739  | RAB3D    | TSS1500          | S_Shore | 0.639±0.054 | 0.827±0.06  | -0.188 | 1.05E-06 | 2.20E-26 | -0.491 |
| cg08352439 | 7  | 55637123  | VOPP1    | 5'UTR/1st intron | N_Shelf | 0.497±0.137 | 0.685±0.119 | -0.188 | 5.70E-03 | 8.97E-11 | -0.312 |
| cg05661139 | 19 | 20011721  | ZNF93    | 5'UTR/1st exon   | N_Shore | 0.134±0.143 | 0.322±0.267 | -0.188 | 2.89E-02 | 9.70E-08 | -0.259 |
| cg07869548 | 16 | 47177603  | NETO2    | 5'UTR/1st exon   | Island  | 0.327±0.081 | 0.515±0.114 | -0.188 | 1.39E-04 | 1.59E-11 | -0.324 |
| cg14825555 | 1  | 27190639  | SFN      | 1st exon/3'UTR   | S_Shore | 0.449±0.137 | 0.637±0.159 | -0.188 | 7.67E-03 | 4.17E-30 | -0.521 |
| cg00760992 | 12 | 50223054  | NCKAP5L  | TSS1500          | S_Shore | 0.491±0.161 | 0.679±0.145 | -0.188 | 1.51E-02 | 4.14E-16 | -0.386 |
| cg08710629 | 16 | 87903292  | SLC7A5   | TSS200           | Island  | 0.471±0.122 | 0.658±0.068 | -0.188 | 2.75E-03 | 1.52E-09 | -0.292 |
| cg10037494 | 11 | 2161135   | IGF2     | 5'UTR            | Island  | 0.614±0.08  | 0.801±0.068 | -0.188 | 9.87E-05 | 7.74E-21 | -0.439 |
| cg12870750 | 17 | 7791882   | CHD3     | TSS1500          | S_Shelf | 0.562±0.101 | 0.749±0.054 | -0.188 | 8.67E-04 | 1.42E-05 | -0.212 |
| cg27366766 | 17 | 56565286  | HSF5     | 1st exon         | Island  | 0.708±0.08  | 0.895±0.05  | -0.187 | 1.36E-04 | 3.80E-06 | -0.225 |
| cg10542975 | 11 | 67205096  | PTPRCAP  | 5'UTR/1st exon   | S_Shore | 0.699±0.102 | 0.887±0.034 | -0.187 | 1.10E-03 | 2.26E-52 | -0.658 |
| cg23175055 | 6  | 31704738  | CLIC1    | 5'UTR/1st exon   | N_Shelf | 0.236±0.078 | 0.423±0.214 | -0.187 | 3.37E-03 | 2.54E-16 | -0.389 |
| cg13516746 | 20 | 3389408   | C2Orf194 | TSS1500          | S_Shore | 0.081±0.068 | 0.269±0.262 | -0.187 | 9.89E-03 | 9.32E-06 | -0.216 |
| cg17199483 | 16 | 16042767  | ABCC1    | TSS1500          | N_Shore | 0.346±0.135 | 0.533±0.177 | -0.187 | 8.73E-03 | 2.65E-10 | -0.305 |
| cg07639376 | 16 | 1584516   | TMEM204  | 1st exon         | Island  | 0.624±0.103 | 0.812±0.054 | -0.187 | 9.47E-04 | 1.01E-12 | -0.342 |
| cg07341220 | 16 | 1583899   | TMEM204  | 5'UTR/1st exon   | Island  | 0.564±0.106 | 0.751±0.055 | -0.187 | 1.17E-03 | 2.98E-10 | -0.304 |
| cg23114616 | 1  | 6526398   | TNFRSF25 | TSS200           | S_Shore | 0.551±0.099 | 0.738±0.149 | -0.187 | 1.22E-03 | 1.70E-17 | -0.403 |
| cg13966383 | 17 | 73893209  | TRIM65   | TSS200           | Island  | 0.292±0.094 | 0.479±0.134 | -0.187 | 6.41E-04 | 5.15E-15 | -0.373 |
| cg13026729 | 6  | 159240774 | EZR      | TSS1500          | Island  | 0.405±0.122 | 0.592±0.202 | -0.187 | 8.13E-03 | 5.55E-14 | -0.359 |
| cg03702686 | 6  | 33244172  | B3GALT4  | TSS1500          | N_Shore | 0.654±0.074 | 0.841±0.039 | -0.187 | 9.00E-05 | 9.82E-18 | -0.405 |
| cg09053081 | 20 | 44746392  | CD40     | TSS1500          | N_Shore | 0.076±0.072 | 0.263±0.262 | -0.187 | 1.05E-02 | 9.41E-11 | -0.312 |
| cg17780956 | 4  | 156297616 | MAP9     | 5'UTR/1st intron | Island  | 0.263±0.189 | 0.45±0.219  | -0.187 | 4.21E-02 | 2.47E-10 | -0.305 |
| cg23030069 | 11 | 2162183   | IGF2     | 5'UTR            | Island  | 0.622±0.102 | 0.809±0.092 | -0.187 | 7.63E-04 | 6.98E-11 | -0.314 |
| cg17518965 | 19 | 3178955   | S1PR4    | 1st exon         | Island  | 0.564±0.08  | 0.751±0.079 | -0.187 | 9.13E-05 | 1.10E-27 | -0.502 |
| cg00499237 | 2  | 97169033  | NEURL3   | 5'UTR            | S_Shelf | 0.657±0.187 | 0.843±0.044 | -0.187 | 2.58E-02 | 5.23E-23 | -0.460 |
| cg15319451 | 1  | 15480748  | TMEM51   | 5'UTR/1st intron | Island  | 0.196±0.125 | 0.383±0.249 | -0.187 | 1.81E-02 | 1.01E-06 | -0.238 |
| cg06583813 | 20 | 62710295  | RGS19    | 5'UTR/1st intron | N_Shore | 0.194±0.124 | 0.381±0.123 | -0.186 | 3.47E-03 | 3.04E-11 | -0.320 |
| cg06583813 | 20 | 62710295  | OPRL1    | TSS1500          | N_Shore | 0.194±0.124 | 0.381±0.123 | -0.186 | 3.47E-03 | 3.06E-09 | -0.287 |
| cg17658002 | 19 | 11689997  | ACPS5    | TSS1500          | S_Shore | 0.63±0.101  | 0.817±0.046 | -0.186 | 9.30E-04 | 2.08E-18 | -0.413 |
| cg22338446 | 19 | 42390475  | ARHGEF1  | 5'UTR/1st intron | S_Shore | 0.547±0.105 | 0.733±0.081 | -0.186 | 9.63E-04 | 5.33E-12 | -0.331 |
| cg10021349 | 19 | 49436805  | DHDH     | TSS200           | Island  | 0.215±0.191 | 0.401±0.209 | -0.186 | 4.17E-02 | 1.18E-05 | -0.214 |
| cg01595870 | 6  | 144386416 | PLAGL1   | TSS1500          | S_Shore | 0.653±0.098 | 0.839±0.059 | -0.186 | 6.47E-04 | 1.99E-07 | -0.253 |
| cg05079794 | 7  | 128050616 | IMPDH1   | TSS1500          | S_Shore | 0.132±0.076 | 0.318±0.149 | -0.186 | 3.33E-04 | 9.46E-08 | -0.259 |
| cg10465839 | 16 | 1584050   | TMEM204  | 5'UTR            | Island  | 0.533±0.102 | 0.719±0.043 | -0.186 | 1.03E-03 | 7.10E-07 | -0.241 |
| cg02900356 | 16 | 31214494  | PYCARD   | TSS1500          | S_Shore | 0.212±0.05  | 0.398±0.146 | -0.186 | 7.65E-05 | 2.13E-14 | -0.365 |
| cg21730993 | 6  | 86159210  | TN5E     | TSS200           | N_Shore | 0.155±0.14  | 0.341±0.28  | -0.186 | 3.39E-02 | 1.08E-07 | -0.258 |
| cg00554413 | 1  | 59042113  | NACSTD2  | 1st exon         | Island  | 0.428±0.106 | 0.613±0.121 | -0.186 | 1.22E-03 | 1.98E-07 | -0.253 |
| cg12405136 | 11 | 68781357  | MIRGPRF  | TSS1500          | S_Shelf | 0.562±0.097 | 0.747±0.067 | -0.186 | 5.78E-04 | 7.68E-08 | -0.261 |
| cg19366591 | 1  | 92951355  | GFI1     | 5'UTR/1st intron | Island  | 0.323±0.17  | 0.509±0.192 | -0.186 | 2.60E-02 | 1.70E-05 | -0.210 |
| cg10064339 | 11 | 73693792  | UCP2     | 5'UTR/1st exon   | Island  | 0.562±0.121 | 0.748±0.083 | -0.186 | 2.77E-03 | 5.12E-10 | -0.300 |
| cg22522066 | 19 | 38754726  | SPINT2   | TSS1500          | N_Shore | 0.31±0.147  | 0.496±0.167 | -0.186 | 1.21E-02 | 3.90E-19 | -0.421 |
| cg18741372 | 19 | 45906156  | PPP1R13L | 5'UTR/1st intron | N_Shelf | 0.517±0.031 | 0.703±0.086 | -0.185 | 3.50E-08 | 6.87E-08 | -0.262 |
| cg02017926 | 12 | 123754328 | CDK2AP1  | 5'UTR/1st intron | N_Shore | 0.639±0.088 | 0.824±0.039 | -0.185 | 3.84E-04 | 8.54E-17 | -0.395 |
| cg13267747 | 5  | 141031176 | FCHSD1   | TSS200           | Island  | 0.318±0.163 | 0.          |        |          |          |        |

|            |    |           |          |                  |         |             |             |        |          |          |        |
|------------|----|-----------|----------|------------------|---------|-------------|-------------|--------|----------|----------|--------|
| cg22184210 | 15 | 57883722  | GCOM1    | TSS1500          | N_Shore | 0.555±0.07  | 0.74±0.127  | -0.185 | 8.35E-05 | 4.55E-17 | -0.398 |
| cg11394785 | 5  | 179221090 | LTC45    | 1st exon         | N_Shore | 0.538±0.082 | 0.723±0.037 | -0.185 | 2.40E-04 | 7.30E-11 | -0.314 |
| cg07856138 | 16 | 29673465  | SPN      | TSS1500          | N_Shelf | 0.383±0.141 | 0.568±0.179 | -0.185 | 1.13E-02 | 8.62E-09 | -0.279 |
| cg19024700 | 19 | 49340765  | HSD17B14 | TSS1500          | Island  | 0.504±0.139 | 0.689±0.17  | -0.185 | 1.00E-02 | 1.41E-14 | -0.367 |
| cg07871590 | 7  | 127671193 | LRRC4    | TSS200           | Island  | 0.558±0.07  | 0.743±0.052 | -0.185 | 4.19E-05 | 6.70E-21 | -0.440 |
| cg07571745 | 1  | 32715428  | LCK      | TSS1500          | S_Shore | 0.582±0.104 | 0.767±0.049 | -0.185 | 1.20E-03 | 3.11E-28 | -0.507 |
| cg19796273 | 5  | 16936868  | MYO10    | TSS1500          | S_Shore | 0.226±0.128 | 0.411±0.172 | -0.185 | 7.06E-03 | 3.96E-08 | -0.267 |
| cg0602086  | 16 | 1583883   | TMEM204  | 5'UTR/1st exon   | Island  | 0.624±0.086 | 0.809±0.049 | -0.185 | 2.80E-04 | 3.86E-13 | -0.348 |
| cg26534477 | 17 | 42147600  | G6PC3    | TSS1500          | N_Shore | 0.57±0.066  | 0.754±0.052 | -0.185 | 2.11E-05 | 2.10E-07 | -0.252 |
| cg19975933 | 11 | 74022477  | P4HA3    | 1st exon         | Island  | 0.412±0.1   | 0.597±0.13  | -0.185 | 1.03E-03 | 2.94E-05 | -0.204 |
| cg06285727 | 11 | 72524028  | ATG16L2  | TSS1500          | N_Shore | 0.311±0.168 | 0.495±0.151 | -0.185 | 2.02E-02 | 1.72E-05 | -0.210 |
| cg05180856 | 15 | 91428056  | FES      | 5'UTR/1st intron | S_Shelf | 0.509±0.112 | 0.693±0.099 | -0.185 | 1.63E-03 | 1.17E-43 | -0.613 |
| cg09694722 | 11 | 2161318   | IGF2     | 5'UTR            | Island  | 0.397±0.061 | 0.581±0.104 | -0.185 | 1.17E-05 | 1.21E-11 | -0.326 |
| cg16107628 | 1  | 159894061 | TAGLN2   | 5'UTR/1st intron | N_Shore | 0.215±0.097 | 0.399±0.231 | -0.185 | 8.54E-03 | 3.04E-35 | -0.559 |
| cg19350469 | 4  | 15704453  | BST1     | TSS200           | N_Shore | 0.578±0.119 | 0.763±0.093 | -0.185 | 2.51E-03 | 2.64E-46 | -0.627 |
| cg23524290 | 19 | 10542131  | PDE4A    | TSS1500          | N_Shore | 0.26±0.079  | 0.444±0.187 | -0.184 | 1.72E-03 | 1.63E-15 | -0.379 |
| cg07054208 | 6  | 24358566  | DCDC2    | 5'UTR/1st intron | N_Shore | 0.454±0.182 | 0.639±0.239 | -0.184 | 4.52E-02 | 1.51E-07 | -0.255 |
| cg08866634 | 5  | 175962338 | RNF44    | 5'UTR/1st intron | N_Shore | 0.471±0.154 | 0.655±0.168 | -0.184 | 1.56E-02 | 2.22E-16 | -0.390 |
| cg13816999 | 11 | 12398883  | PARVA    | TSS1500          | N_Shore | 0.431±0.108 | 0.615±0.172 | -0.184 | 3.36E-03 | 8.52E-08 | -0.260 |
| cg10142237 | 22 | 38714395  | CSNK1E   | TSS1500          | S_Shore | 0.569±0.106 | 0.753±0.044 | -0.184 | 1.42E-03 | 7.24E-20 | -0.429 |
| cg13412498 | 9  | 36037340  | RECK     | 5'UTR/1st intron | Island  | 0.234±0.163 | 0.419±0.263 | -0.184 | 4.13E-02 | 5.21E-21 | -0.441 |
| cg22545138 | 7  | 23510005  | IGF2BP3  | TSS200           | S_Shore | 0.153±0.052 | 0.338±0.19  | -0.184 | 9.92E-04 | 1.27E-09 | -0.293 |
| cg20294304 | 6  | 34203153  | HMGAI1   | TSS1500          | Island  | 0.624±0.085 | 0.808±0.06  | -0.184 | 2.19E-04 | 1.27E-08 | -0.276 |
| cg19474029 | 19 | 35491595  | GRAMD1A  | 5'UTR/1st intron | Island  | 0.023±0.033 | 0.207±0.181 | -0.184 | 5.17E-04 | 4.74E-09 | -0.283 |
| cg14018690 | 3  | 111804832 | C3orf52  | TSS1500          | N_Shore | 0.463±0.123 | 0.647±0.15  | -0.184 | 4.49E-03 | 2.90E-09 | -0.287 |
| cg10500147 | 12 | 6881601   | LAG3     | TSS200           | N_Shore | 0.375±0.135 | 0.559±0.138 | -0.184 | 6.91E-03 | 3.73E-10 | -0.302 |
| cg03302259 | 19 | 11689855  | ACP5     | TSS1500          | S_Shore | 0.493±0.102 | 0.677±0.196 | -0.184 | 4.55E-03 | 2.53E-25 | -0.482 |
| cg04529938 | 17 | 73084494  | SLC16A5  | 5'UTR/1st intron | Island  | 0.595±0.09  | 0.779±0.035 | -0.184 | 5.44E-04 | 2.50E-34 | -0.553 |
| cg08793208 | 16 | 66585449  | CKLF     | TSS1500          | N_Shore | 0.16±0.052  | 0.343±0.138 | -0.184 | 5.45E-05 | 6.13E-16 | -0.384 |
| cg19348484 | 15 | 91413236  | FURIN    | 5'UTR/1st intron | N_Shore | 0.581±0.105 | 0.765±0.053 | -0.183 | 1.26E-03 | 4.23E-17 | -0.398 |
| cg17213699 | 12 | 6881624   | LAG3     | TSS200           | N_Shore | 0.59±0.138  | 0.774±0.098 | -0.183 | 6.58E-03 | 1.91E-12 | -0.338 |
| cg05729480 | 17 | 75276428  | SEPT9    | TSS1500          | N_Shore | 0.493±0.158 | 0.676±0.106 | -0.183 | 1.36E-02 | 2.90E-18 | -0.411 |
| cg19994779 | 14 | 105482622 | CDC44    | 5'UTR/1st intron | N_Shelf | 0.508±0.084 | 0.691±0.09  | -0.183 | 1.67E-04 | 3.78E-12 | -0.333 |
| cg17024258 | 1  | 160370982 | VANGL2   | 5'UTR/1st intron | S_Shore | 0.208±0.065 | 0.391±0.164 | -0.183 | 4.46E-04 | 2.39E-06 | -0.230 |
| cg17078116 | 8  | 24772344  | NEFM     | 1st exon         | Island  | 0.507±0.132 | 0.69±0.11   | -0.183 | 5.40E-03 | 1.84E-07 | -0.253 |
| cg11230716 | 19 | 49436812  | DHDH     | TSS200           | Island  | 0.192±0.173 | 0.375±0.214 | -0.183 | 3.40E-02 | 9.79E-06 | -0.216 |
| cg15149596 | 11 | 19138954  | ZDHHC13  | 5'UTR/1st intron | Island  | 0.157±0.08  | 0.34±0.286  | -0.183 | 2.02E-02 | 3.32E-07 | -0.248 |
| cg05203776 | 11 | 2162582   | IGF2     | 5'UTR            | S_Shore | 0.5±0.057   | 0.683±0.154 | -0.183 | 1.93E-04 | 2.88E-08 | -0.269 |
| cg19878987 | 12 | 21810999  | LDHB     | TSS1500          | S_Shore | 0.51±0.117  | 0.693±0.097 | -0.183 | 2.49E-03 | 3.63E-17 | -0.399 |
| cg06133110 | 7  | 30028307  | SCRN1    | 5'UTR/1st intron | N_Shore | 0.511±0.106 | 0.694±0.162 | -0.182 | 2.71E-03 | 2.38E-13 | -0.350 |
| cg01073837 | 8  | 38757859  | PLEKHA2  | TSS1500          | N_Shore | 0.413±0.136 | 0.595±0.183 | -0.182 | 1.12E-02 | 1.02E-05 | -0.216 |
| cg06330618 | 15 | 91428456  | FES      | 1st exon         | S_Shelf | 0.541±0.08  | 0.723±0.081 | -0.182 | 1.16E-04 | 1.03E-37 | -0.576 |
| cg17283781 | 6  | 52226707  | PAQR8    | TSS1500          | N_Shore | 0.471±0.147 | 0.653±0.123 | -0.182 | 1.02E-02 | 2.25E-10 | -0.306 |
| cg24484339 | 8  | 86157525  | CA13     | TSS200           | N_Shore | 0.166±0.101 | 0.348±0.261 | -0.182 | 1.73E-02 | 3.48E-05 | -0.202 |
| cg03432736 | 4  | 10119609  | WDR1     | TSS1500          | S_Shore | 0.53±0.079  | 0.712±0.086 | -0.182 | 9.47E-05 | 2.20E-09 | -0.289 |
| cg02740606 | 11 | 67206418  | PTPRCAP  | TSS1500          | S_Shelf | 0.731±0.095 | 0.913±0.045 | -0.182 | 7.20E-04 | 3.84E-47 | -0.631 |
| cg12897947 | 17 | 76125152  | TMC6     | 5'UTR/1st intron | N_Shelf | 0.131±0.108 | 0.313±0.246 | -0.182 | 1.49E-02 | 1.60E-11 | -0.324 |
| cg03883348 | 19 | 45843826  | KLC3     | TSS200           | N_Shore | 0.394±0.128 | 0.576±0.191 | -0.182 | 9.85E-03 | 5.89E-08 | -0.263 |
| cg19168338 | 16 | 4465731   | CORO7    | 5'UTR/1st exon   | N_Shore | 0.26±0.104  | 0.442±0.186 | -0.182 | 4.27E-03 | 1.59E-16 | -0.391 |
| cg09884451 | 4  | 2366831   | ZFYVE28  | TSS1500          | Island  | 0.549±0.048 | 0.731±0.136 | -0.182 | 4.28E-05 | 7.17E-12 | -0.329 |
| cg25429672 | 11 | 73692155  | UCP2     | 5'UTR            | N_Shore | 0.571±0.121 | 0.753±0.11  | -0.182 | 3.30E-03 | 4.01E-28 | -0.506 |
| cg03297007 | 12 | 123450869 | ABC89    | 5'UTR/1st exon   | Island  | 0.12±0.095  | 0.301±0.201 | -0.182 | 4.56E-03 | 7.89E-11 | -0.313 |
| cg14299675 | 9  | 91149046  | NXNL2    | TSS1500          | N_Shore | 0.374±0.177 | 0.556±0.204 | -0.182 | 3.57E-02 | 3.56E-05 | -0.202 |
| cg04653522 | 11 | 87908631  | RAB38    | 5'UTR/1st exon   | S_Shore | 0.312±0.142 | 0.494±0.191 | -0.182 | 1.48E-02 | 8.27E-11 | -0.313 |
| cg00313981 | 1  | 228595062 | TRIM11   | TSS1500          | S_Shore | 0.195±0.087 | 0.377±0.228 | -0.182 | 7.40E-03 | 2.31E-06 | -0.230 |
| cg16473141 | 14 | 24641501  | REC8     | 5'UTR/1st exon   | Island  | 0.622±0.082 | 0.803±0.042 | -0.181 | 2.57E-04 | 1.10E-11 | -0.326 |
| cg13401339 | 2  | 24272928  | FKBP1B   | 5'UTR/1st intron | Island  | 0.046±0.057 | 0.227±0.178 | -0.181 | 7.43E-04 | 1.26E-08 | -0.276 |
| cg04539574 | 5  | 16936819  | MYO10    | TSS1500          | S_Shore | 0.11±0.068  | 0.291±0.144 | -0.181 | 2.13E-04 | 1.28E-06 | -0.236 |
| cg03088990 | 20 | 44540278  | PLTP     | 5'UTR/1st intron | N_Shore | 0.439±0.104 | 0.62±0.087  | -0.181 | 1.15E-03 | 1.01E-11 | -0.327 |
| cg04599026 | 7  | 96634763  | DLX6     | TSS1500          | Island  | 0.564±0.089 | 0.745±0.192 | -0.181 | 3.16E-03 | 9.72E-17 | -0.394 |
| cg14273126 | 19 | 859499    | CFD      | TSS200           | N_Shelf | 0.436±0.085 | 0.617±0.159 | -0.181 | 1.01E-03 | 1.75E-05 | -0.210 |
| cg22706106 | 1  | 153607701 | S100A13  | TSS1500          | S_Shore | 0.371±0.143 | 0.551±0.172 | -0.181 | 1.31E-02 | 1.82E-05 | -0.209 |
| cg17219326 | 3  | 44517846  | ZNF445   | 5'UTR/1st intron | N_Shore | 0.159±0.112 | 0.34±0.198  | -0.181 | 7.20E-03 | 1.08E-09 | -0.295 |
| cg20622019 | 20 | 43279793  | ADA      | 5'UTR/1st intron | N_Shore | 0.453±0.137 | 0.634±0.138 | -0.181 | 8.07E-03 | 3.49E-19 | -0.422 |
| cg13477101 | 7  | 1067302   | C7orf50  | 5'UTR/1st intron | Island  | 0.564±0.104 | 0.744±0.06  | -0.181 | 1.28E-03 | 1.33E-05 | -0.213 |
| cg27262415 | 11 | 67205166  | PTPRCAP  | TSS200           | S_Shore | 0.517±0.095 | 0.698±0.055 | -0.180 | 6.60E-04 | 4.01E-28 | -0.506 |
| cg10815400 | 1  | 65210420  | RAVER2   | TSS1500          | Island  | 0.13±0.091  | 0.311±0.222 | -0.180 | 7.20E-03 | 2.09E-10 | -0.306 |
| cg09728392 | 16 | 66585799  | CKLF     | TSS1500          | N_Shore | 0.547±0.109 | 0.727±0.101 | -0.180 | 1.61E-03 | 4.22E-16 | -0.386 |
| cg01016800 | 10 | 97802959  | CCNI     | TSS200           | Island  | 0.479±0.17  | 0.66±0.111  | -0.180 | 2.08E-02 | 6.05E-26 | -0.487 |
| cg17084361 | 4  | 85503668  | CDS1     | TSS1500          | Island  | 0.23±0.181  | 0.41±0.203  | -0.180 | 3.97E-02 | 3.23E-06 | -0.227 |
| cg01733438 | 17 | 75276069  | SEPT9    | TSS1500          | N_Shore | 0.564±0.159 | 0.744±0.118 | -0.180 | 1.60E-02 | 5.32E-22 | -0.451 |
| cg15393937 | 11 | 2161383   | IGF2     | 5'UTR            | Island  | 0.618±0.085 | 0.798±0.07  | -0.180 | 2.28E-04 | 5.73E-21 | -0.440 |
| cg24517501 | 1  | 92952702  | GFI1     | TSS1500          | S_Shore | 0.663±0.097 | 0.843±0.071 | -0.180 | 7.44E-04 | 1.85E-32 | -0.539 |
| cg02166532 | 11 | 2159853   | IGF2     | 5'UTR            | Island  | 0.265±0.084 | 0.445±0.144 | -0.180 | 6.04E-04 | 4.33E-16 | -0.386 |
| cg01441777 | 22 | 38714416  | CSNK1E   | TSS1500          | S_Shore | 0.552±0.09  | 0.732±0.049 | -0.180 | 5.00E-04 | 2.41E-18 | -0.412 |
| cg15679651 | 19 | 39108529  | MAP4K1   | 1st exon         | N_Shore | 0.434±0.104 | 0.614±0.103 | -0.180 | 1.27E-03 | 3.22E-15 | -0.375 |
| cg19854901 | 3  | 50376216  | RASSF1   | 5'UTR/1st intron | S_Shore | 0.681±0.099 | 0.86±0.027  | -0.180 | 1.20E-03 | 8.49E-06 | -0.217 |
| cg17610931 | 22 | 31476670  | SMTN     | TSS1500          | N_Shore | 0.407±0.077 | 0.586±0.17  | -0.180 | 1.10E-03 | 1.83E-07 | -0.254 |
| cg04597449 | 5  | 94955575  | GPR150   | TSS1500          | N_Shore | 0.486±0.139 | 0.665±0.198 | -0.179 | 1.60E-02 | 1.22E-05 | -0.214 |
| cg01167556 | 12 | 56323639  | DGKA     | TSS1500          | S_Shelf | 0.505±0.149 | 0.684±0.162 | -0.179 | 1.51E-02 | 1.04E-15 | -0.381 |
| cg21717369 | 6  | 8103092   | EEF1E1   | TSS1500          | S_Shore | 0.377±0.162 | 0.556±0.225 | -0.179 | 3.33E-02 | 2.13E-06 | -0.231 |
| cg18512948 | 14 | 24641706  | REC8     | 5'UTR            | Island  | 0.654±0.08  | 0.833±0.039 | -0.179 | 2.51E-04 | 5.63E-13 | -0.345 |
| cg12717594 | 9  | 36037454  | RECK     | 5'UTR/1st intron | Island  | 0.218±0.162 | 0.397±0.237 | -0.179 | 3.70E-02 | 3.83E-24 | -0.471 |
| cg12273383 | 22 | 31689831  | PIK3IP1  | TSS1500          | S_Shelf | 0.507±0.153 | 0.686±0.09  | -0.179 | 1.28E-02 | 5.99E-11 | -0.315 |
| cg06434451 | 1  | 32802291  | MARCKSL1 | TSS1500          | S_Shore | 0.599±0.131 | 0.778±0.085 | -0.179 | 5.49E-03 | 9.54E-12 | -0.327 |
| cg18396533 | 10 | 82116208  | DYDC1    | 5'UTR/1st intron | Island  | 0.577±0.09  | 0.756±0.032 | -0.179 | 6.31E-04 | 2.70E-07 | -0.250 |
| cg26870803 | 11 | 66624853  | LRFN4    | 5'UTR/1st intron | Island  | 0.468±0.15  | 0.647±0.162 | -0.179 | 1.55E-02 | 1.28E-17 | -0.404 |

|            |    |           |                 |                  |         |             |             |        |          |          |        |
|------------|----|-----------|-----------------|------------------|---------|-------------|-------------|--------|----------|----------|--------|
| cg14614490 | 9  | 123637816 | <i>PHF19</i>    | 5'UTR/1st intron | N_Shore | 0.62±0.062  | 0.799±0.045 | -0.179 | 1.91E-05 | 5.78E-22 | -0.450 |
| cg00556029 | 1  | 32802033  | <i>MARCKSL1</i> | TSS200           | Island  | 0.215±0.123 | 0.394±0.168 | -0.179 | 6.80E-03 | 1.33E-12 | -0.340 |
| cg00220455 | 11 | 67171191  | <i>TBC1D10C</i> | TSS1500          | S_Shelf | 0.529±0.101 | 0.708±0.047 | -0.179 | 1.19E-03 | 9.81E-16 | -0.382 |
| cg14254748 | 1  | 62660421  | <i>L1TD1</i>    | TSS200           | N_Shore | 0.612±0.203 | 0.791±0.071 | -0.179 | 4.19E-02 | 5.02E-07 | -0.245 |
| cg12419195 | 2  | 191272731 | <i>MFS06</i>    | TSS1500          | Island  | 0.036±0.009 | 0.215±0.26  | -0.179 | 9.55E-03 | 9.47E-09 | -0.278 |
| cg12650926 | 6  | 33589118  | <i>ITPR3</i>    | TSS200           | Island  | 0.143±0.11  | 0.322±0.217 | -0.179 | 1.05E-02 | 8.76E-06 | -0.217 |
| cg22356324 | 10 | 71077947  | <i>HK1</i>      | 5'UTR/1st exon   | N_Shore | 0.523±0.112 | 0.702±0.143 | -0.179 | 3.10E-03 | 2.33E-11 | -0.321 |
| cg18684951 | 5  | 141700490 | <i>SPRY4</i>    | 5'UTR/1st intron | N_Shelf | 0.403±0.065 | 0.582±0.147 | -0.179 | 2.40E-04 | 1.01E-11 | -0.327 |
| cg12191938 | 10 | 88730946  | <i>AGAP11</i>   | 5'UTR/1st intron | S_Shelf | 0.58±0.118  | 0.759±0.12  | -0.179 | 3.29E-03 | 1.92E-09 | -0.290 |
| cg02039987 | 2  | 157291262 | <i>GP02</i>     | TSS1500          | N_Shore | 0.585±0.066 | 0.764±0.114 | -0.179 | 4.87E-05 | 6.64E-15 | -0.371 |
| cg16260696 | 11 | 67171200  | <i>TBC1D10C</i> | TSS1500          | S_Shelf | 0.542±0.103 | 0.721±0.079 | -0.179 | 1.14E-03 | 1.13E-17 | -0.405 |
| cg03929741 | 13 | 107187681 | <i>EFNB2</i>    | TSS1500          | Island  | 0.477±0.163 | 0.656±0.17  | -0.179 | 2.33E-02 | 1.08E-05 | -0.215 |
| cg23655039 | 3  | 182972742 | <i>B3GNT5</i>   | 5'UTR/1st intron | S_Shore | 0.412±0.122 | 0.591±0.151 | -0.179 | 5.52E-03 | 1.21E-28 | -0.510 |
| cg20931541 | 6  | 144386528 | <i>PLAGL1</i>   | TSS1500          | S_Shore | 0.657±0.113 | 0.836±0.117 | -0.178 | 2.49E-03 | 1.57E-05 | -0.211 |
| cg05877528 | 22 | 26875552  | <i>HPS4</i>     | 1st exon         | N_Shelf | 0.329±0.121 | 0.507±0.219 | -0.178 | 1.41E-02 | 3.31E-05 | -0.203 |
| cg19154438 | 19 | 45825730  | <i>CKM</i>      | 5'UTR/1st intron | N_Shore | 0.607±0.139 | 0.785±0.132 | -0.178 | 9.18E-03 | 9.15E-09 | -0.278 |
| cg03584056 | 19 | 4910798   | <i>UHRF1</i>    | 5'UTR/1st exon   | S_Shore | 0.292±0.107 | 0.47±0.115  | -0.178 | 1.74E-03 | 5.62E-16 | -0.385 |
| cg20038493 | 14 | 24809226  | <i>RIPK3</i>    | 5'UTR/1st exon   | S_Shore | 0.416±0.144 | 0.594±0.133 | -0.178 | 1.10E-02 | 2.79E-37 | -0.573 |
| cg25599269 | 19 | 12075882  | <i>ZNF763</i>   | 5'UTR/1st exon   | N_Shore | 0.327±0.142 | 0.505±0.266 | -0.178 | 3.66E-02 | 3.18E-21 | -0.443 |
| cg10106091 | 12 | 117176294 | <i>RNFT2</i>    | 5'UTR/1st intron | Island  | 0.14±0.133  | 0.318±0.238 | -0.178 | 2.33E-02 | 5.84E-08 | -0.263 |
| cg10106091 | 12 | 117176294 | <i>C12orf49</i> | TSS1500          | Island  | 0.14±0.133  | 0.318±0.238 | -0.178 | 2.33E-02 | 1.53E-06 | -0.234 |
| cg02481294 | 4  | 15704550  | <i>BST1</i>     | TSS200           | N_Shore | 0.507±0.115 | 0.685±0.072 | -0.178 | 2.63E-03 | 3.34E-29 | -0.514 |
| cg10137231 | 14 | 24641021  | <i>REC8</i>     | TSS1500          | N_Shore | 0.656±0.074 | 0.834±0.052 | -0.178 | 1.02E-04 | 4.56E-12 | -0.332 |
| cg17397004 | 22 | 38863644  | <i>KDEL3</i>    | TSS1500          | N_Shore | 0.527±0.157 | 0.705±0.181 | -0.178 | 2.24E-02 | 1.62E-14 | -0.366 |
| cg17146640 | 22 | 46933650  | <i>CELSR1</i>   | TSS1500          | Island  | 0.174±0.158 | 0.352±0.204 | -0.178 | 2.72E-02 | 2.91E-05 | -0.204 |
| cg05859777 | 11 | 2161102   | <i>IGF2</i>     | 5'UTR            | Island  | 0.573±0.096 | 0.751±0.127 | -0.178 | 9.99E-04 | 5.69E-21 | -0.440 |
| cg11700824 | 10 | 88730823  | <i>AGAP11</i>   | 5'UTR/1st intron | S_Shelf | 0.336±0.166 | 0.513±0.183 | -0.178 | 2.76E-02 | 4.19E-05 | -0.200 |
| cg25392995 | 22 | 50625926  | <i>TRABD</i>    | 5'UTR/1st intron | N_Shelf | 0.627±0.105 | 0.805±0.065 | -0.178 | 1.48E-03 | 7.82E-06 | -0.218 |
| cg27404606 | 20 | 3747579   | <i>C20orf27</i> | 5'UTR/1st intron | N_Shore | 0.269±0.105 | 0.446±0.141 | -0.177 | 2.18E-03 | 2.61E-19 | -0.423 |
| cg01060026 | 3  | 129324501 | <i>PLXND1</i>   | 1st exon         | Island  | 0.345±0.167 | 0.522±0.204 | -0.177 | 3.30E-02 | 6.23E-08 | -0.263 |
| cg16158807 | 9  | 95946891  | <i>WNK2</i>     | TSS1500          | Island  | 0.323±0.193 | 0.5±0.162   | -0.177 | 4.30E-02 | 1.93E-13 | -0.352 |
| cg20154403 | 19 | 37407486  | <i>ZNF568</i>   | 5'UTR/1st exon   | S_Shore | 0.219±0.14  | 0.396±0.266 | -0.177 | 3.67E-02 | 2.18E-29 | -0.516 |
| cg20154403 | 19 | 37407486  | <i>ZNF829</i>   | TSS1500          | S_Shore | 0.219±0.14  | 0.396±0.266 | -0.177 | 3.67E-02 | 5.16E-17 | -0.397 |
| cg10798745 | 1  | 145715636 | <i>CD160</i>    | 1st exon         | S_Shore | 0.635±0.117 | 0.812±0.042 | -0.177 | 3.26E-03 | 4.44E-14 | -0.360 |
| cg01568973 | 1  | 53528991  | <i>PODN</i>     | 5'UTR/1st intron | S_Shore | 0.602±0.093 | 0.779±0.063 | -0.177 | 6.36E-04 | 4.30E-10 | -0.301 |
| cg07409680 | 12 | 32260442  | <i>BICD1</i>    | 1st exon         | S_Shore | 0.129±0.095 | 0.306±0.222 | -0.177 | 8.94E-03 | 6.61E-22 | -0.450 |
| cg04230060 | 9  | 114937992 | <i>SUSD1</i>    | TSS1500          | S_Shore | 0.581±0.099 | 0.758±0.096 | -0.177 | 9.48E-04 | 4.56E-17 | -0.398 |
| cg11863536 | 19 | 10543050  | <i>PDE4A</i>    | TSS200           | Island  | 0.279±0.142 | 0.456±0.19  | -0.177 | 1.68E-02 | 3.38E-14 | -0.362 |
| cg15387123 | 9  | 139891058 | <i>CLIC3</i>    | TSS200           | S_Shore | 0.336±0.121 | 0.513±0.156 | -0.177 | 5.88E-03 | 8.09E-08 | -0.261 |
| cg04555966 | 7  | 44185986  | <i>GCK</i>      | TSS1500          | Island  | 0.556±0.095 | 0.733±0.171 | -0.177 | 2.64E-03 | 5.71E-08 | -0.263 |
| cg14692284 | 5  | 118693725 | <i>TNFAIP8</i>  | 5'UTR            | S_Shore | 0.674±0.11  | 0.851±0.025 | -0.177 | 2.51E-03 | 6.85E-12 | -0.330 |
| cg20381020 | 11 | 66624258  | <i>LRFN4</i>    | TSS1500          | Island  | 0.34±0.111  | 0.517±0.125 | -0.177 | 2.60E-03 | 1.74E-16 | -0.391 |
| cg06804564 | 1  | 90100070  | <i>LRRRC8C</i>  | 5'UTR/1st intron | S_Shore | 0.335±0.159 | 0.511±0.248 | -0.177 | 4.10E-02 | 1.16E-08 | -0.276 |
| cg12444861 | 6  | 144386275 | <i>PLAGL1</i>   | TSS1500          | S_Shore | 0.521±0.073 | 0.698±0.157 | -0.176 | 6.62E-04 | 5.32E-07 | -0.244 |
| cg03075605 | 11 | 96123810  | <i>JRKL</i>     | 5'UTR            | S_Shore | 0.29±0.064  | 0.466±0.25  | -0.176 | 1.07E-02 | 1.24E-09 | -0.294 |
| cg06538345 | 19 | 49993186  | <i>RPL13A</i>   | 5'UTR            | S_Shelf | 0.612±0.077 | 0.788±0.135 | -0.176 | 3.65E-04 | 1.41E-16 | -0.392 |
| cg14534464 | 7  | 26191633  | <i>NFE2L3</i>   | TSS1500          | N_Shore | 0.197±0.16  | 0.373±0.228 | -0.176 | 3.56E-02 | 2.98E-08 | -0.269 |
| cg19563932 | 6  | 31583915  | <i>AIF1</i>     | 1st exon         | N_Shelf | 0.507±0.073 | 0.684±0.117 | -0.176 | 1.35E-04 | 3.62E-07 | -0.248 |
| cg11848173 | 12 | 56121015  | <i>CD63</i>     | 5'UTR            | N_Shore | 0.586±0.136 | 0.763±0.085 | -0.176 | 7.38E-03 | 3.26E-21 | -0.443 |
| cg23553480 | 2  | 233925275 | <i>INPP5D</i>   | 1st exon         | Island  | 0.404±0.161 | 0.58±0.207  | -0.176 | 3.09E-02 | 5.83E-08 | -0.263 |
| cg14405137 | 12 | 50219283  | <i>NCKAP5L</i>  | 5'UTR/1st intron | N_Shelf | 0.566±0.091 | 0.742±0.039 | -0.176 | 6.99E-04 | 5.86E-09 | -0.282 |
| cg01394116 | 5  | 150081499 | <i>RBM22</i>    | TSS1500          | S_Shore | 0.521±0.111 | 0.698±0.153 | -0.176 | 3.88E-03 | 2.16E-09 | -0.289 |
| cg11448683 | 1  | 45274099  | <i>BTBD19</i>   | TSS200           | S_Shore | 0.225±0.095 | 0.401±0.152 | -0.176 | 1.78E-03 | 5.34E-12 | -0.331 |
| cg00045515 | 20 | 35723332  | <i>RBL1</i>     | 5'UTR/1st intron | N_Shore | 0.672±0.087 | 0.848±0.072 | -0.176 | 3.59E-04 | 1.11E-09 | -0.294 |
| cg00186701 | 8  | 98290510  | <i>TSPYL5</i>   | TSS1500          | S_Shore | 0.598±0.093 | 0.774±0.051 | -0.176 | 7.09E-04 | 1.55E-20 | -0.436 |
| cg14741691 | 19 | 40855329  | <i>C19orf47</i> | TSS1500          | S_Shore | 0.558±0.182 | 0.734±0.17  | -0.176 | 3.79E-02 | 6.43E-07 | -0.242 |
| cg07217954 | 7  | 1067459   | <i>C7orf50</i>  | 5'UTR/1st intron | Island  | 0.483±0.082 | 0.659±0.138 | -0.176 | 5.84E-04 | 4.03E-05 | -0.201 |
| cg02398682 | 1  | 32802228  | <i>MARCKSL1</i> | TSS1500          | Island  | 0.302±0.115 | 0.477±0.144 | -0.176 | 4.19E-03 | 2.21E-16 | -0.390 |
| cg20737812 | 15 | 86336631  | <i>KLHL25</i>   | 5'UTR/1st intron | N_Shore | 0.488±0.128 | 0.664±0.17  | -0.176 | 9.48E-03 | 5.12E-12 | -0.331 |
| cg02939139 | 12 | 113574204 | <i>RASAL1</i>   | TSS1500          | S_Shore | 0.305±0.096 | 0.48±0.21   | -0.176 | 7.35E-03 | 5.16E-09 | -0.283 |
| cg13947995 | 15 | 91427821  | <i>FES</i>      | 5'UTR/1st intron | S_Shelf | 0.145±0.09  | 0.32±0.299  | -0.176 | 3.30E-02 | 9.74E-24 | -0.467 |
| cg23676551 | 11 | 2161374   | <i>IGF2</i>     | 5'UTR            | Island  | 0.6±0.09    | 0.776±0.08  | -0.176 | 4.79E-04 | 2.12E-18 | -0.413 |
| cg14183922 | 17 | 75371532  | <i>SEPT9</i>    | 5'UTR            | S_Shore | 0.605±0.078 | 0.78±0.045  | -0.175 | 2.15E-04 | 4.25E-06 | -0.224 |
| cg18809289 | 10 | 45869816  | <i>ALOX5</i>    | 1st exon         | Island  | 0.313±0.152 | 0.488±0.145 | -0.175 | 1.65E-02 | 2.46E-06 | -0.230 |
| cg20051772 | 12 | 56325015  | <i>DGKA</i>     | 5'UTR/1st exon   | S_Shelf | 0.229±0.118 | 0.405±0.261 | -0.175 | 2.68E-02 | 3.35E-05 | -0.203 |
| cg18105842 | 17 | 7341440   | <i>FGF11</i>    | TSS1500          | N_Shore | 0.563±0.102 | 0.738±0.05  | -0.175 | 1.49E-03 | 1.03E-22 | -0.458 |
| cg09671005 | 5  | 102594958 | <i>Sorf30</i>   | 5'UTR/1st intron | Island  | 0.107±0.138 | 0.282±0.258 | -0.175 | 3.47E-02 | 2.01E-07 | -0.253 |
| cg04332373 | 4  | 15779642  | <i>CD38</i>     | TSS1500          | N_Shore | 0.554±0.108 | 0.729±0.106 | -0.175 | 2.04E-03 | 7.13E-14 | -0.358 |
| cg14399078 | 3  | 119298802 | <i>ADPRH</i>    | 5'UTR/1st intron | Island  | 0.05±0.01   | 0.226±0.222 | -0.175 | 3.89E-03 | 1.18E-08 | -0.276 |
| cg15052854 | 3  | 119298811 | <i>ADPRH</i>    | 5'UTR/1st intron | Island  | 0.084±0.01  | 0.258±0.181 | -0.175 | 7.63E-04 | 5.28E-11 | -0.316 |
| cg24690071 | 13 | 100635352 | <i>ZIC2</i>     | 1st exon         | N_Shore | 0.322±0.124 | 0.497±0.231 | -0.175 | 2.01E-02 | 4.72E-08 | -0.265 |
| cg16001384 | 8  | 134306801 | <i>NDRG1</i>    | 5'UTR/1st intron | N_Shore | 0.649±0.12  | 0.824±0.03  | -0.174 | 4.22E-03 | 1.04E-29 | -0.518 |
| cg03564674 | 20 | 62715756  | <i>OPRL1</i>    | 5'UTR/1st intron | Island  | 0.257±0.124 | 0.431±0.229 | -0.174 | 1.98E-02 | 2.02E-05 | -0.208 |
| cg10622551 | 4  | 2366555   | <i>ZFYVE28</i>  | 5'UTR/1st exon   | Island  | 0.47±0.053  | 0.645±0.158 | -0.174 | 3.51E-04 | 1.68E-06 | -0.233 |
| cg06869445 | 16 | 16043240  | <i>ABCC1</i>    | TSS200           | Island  | 0.119±0.161 | 0.293±0.202 | -0.174 | 3.12E-02 | 1.63E-05 | -0.211 |
| cg12642521 | 11 | 68781202  | <i>MRGPRF</i>   | TSS1500          | S_Shelf | 0.306±0.13  | 0.48±0.133  | -0.174 | 7.63E-03 | 2.97E-05 | -0.204 |
| cg15048534 | 17 | 74381192  | <i>SPHK1</i>    | 1st exon         | Island  | 0.237±0.13  | 0.411±0.162 | -0.174 | 9.80E-03 | 1.56E-08 | -0.274 |
| cg05373723 | 4  | 141347993 | <i>CLGN</i>     | 5'UTR/1st intron | N_Shore | 0.21±0.122  | 0.383±0.197 | -0.174 | 1.22E-02 | 3.64E-17 | -0.399 |
| cg20948757 | 5  | 114632659 | <i>CCDC112</i>  | TSS1500          | S_Shore | 0.103±0.106 | 0.277±0.24  | -0.174 | 1.71E-02 | 1.52E-12 | -0.339 |
| cg21589115 | 19 | 49867114  | <i>TEAD2</i>    | TSS1500          | S_Shore | 0.217±0.137 | 0.39±0.226  | -0.174 | 2.51E-02 | 2.81E-16 | -0.388 |
| cg17079034 | 2  | 239047280 | <i>KLHL30</i>   | TSS200           | N_Shelf | 0.376±0.071 | 0.549±0.113 | -0.174 | 1.16E-04 | 1.20E-08 | -0.276 |
| cg07474022 | 20 | 35974912  | <i>SRC</i>      | 5'UTR/1st intron | Island  | 0.242±0.129 | 0.415±0.182 | -0.173 | 1.25E-02 | 2.34E-23 | -0.464 |
| cg05554039 | 11 | 75379223  | <i>MAP6</i>     | 1st exon         | Island  | 0.25±0.144  | 0.424±0.157 | -0.173 | 1.50E-02 | 4.37E-06 | -0.224 |
| cg04755561 | 16 | 3029641   | <i>PKMYT1</i>   | 5'UTR            | N_Shore | 0.582±0.147 | 0.756±0.085 | -0.173 | 1.21E-02 | 1.51E-23 | -0.465 |
| cg04528038 | 16 | 21171097  | <i>TMEM159</i>  | 5'UTR/1          |         |             |             |        |          |          |        |

|             |    |           |         |                  |         |             |             |        |          |          |        |
|-------------|----|-----------|---------|------------------|---------|-------------|-------------|--------|----------|----------|--------|
| cg19194454  | 16 | 69760878  | NQO1    | TSS1500          | S_Shore | 0.26±0.15   | 0.433±0.22  | -0.173 | 3.04E-02 | 1.98E-29 | -0.516 |
| cg02952008  | 1  | 228604065 | TRIM17  | 5'UTR/1st intron | Island  | 0.32±0.151  | 0.493±0.168 | -0.173 | 1.99E-02 | 1.02E-08 | -0.277 |
| cg02561771  | 2  | 102091318 | RFX8    | TSS200           | S_Shore | 0.527±0.11  | 0.7±0.104   | -0.173 | 2.36E-03 | 4.72E-07 | -0.245 |
| cg06829266  | 16 | 446668    | NME4    | TSS1500          | N_Shore | 0.178±0.145 | 0.351±0.217 | -0.173 | 2.70E-02 | 3.19E-14 | -0.362 |
| cg07313319  | 22 | 38714426  | CSNK1E  | TSS1500          | S_Shore | 0.557±0.09  | 0.73±0.046  | -0.173 | 6.70E-04 | 7.68E-20 | -0.429 |
| cg01577187  | 2  | 106362832 | NCK2    | 5'UTR/1st intron | S_Shore | 0.194±0.097 | 0.367±0.223 | -0.173 | 1.10E-02 | 1.54E-08 | -0.274 |
| cg02672854  | 6  | 26521696  | HCG11   | TSS1500          | N_Shore | 0.155±0.126 | 0.328±0.224 | -0.173 | 2.01E-02 | 2.35E-08 | -0.271 |
| cg01525376  | 1  | 32716212  | LCK     | TSS1500          | S_Shelf | 0.457±0.067 | 0.63±0.064  | -0.173 | 3.49E-05 | 2.71E-07 | -0.250 |
| cg05256605  | 5  | 121412184 | LOX     | 5'UTR/1st intron | N_Shore | 0.533±0.118 | 0.706±0.122 | -0.173 | 4.21E-03 | 1.94E-08 | -0.272 |
| cg14473743  | 3  | 13462496  | NUP210  | TSS1500          | S_Shore | 0.478±0.099 | 0.651±0.119 | -0.173 | 1.36E-03 | 4.50E-06 | -0.224 |
| cg26961808  | 7  | 128470913 | FLNC    | 1st exon         | Island  | 0.408±0.19  | 0.581±0.122 | -0.173 | 4.05E-02 | 9.58E-09 | -0.278 |
| cg06718763  | 1  | 24828586  | RCAN3   | TSS1500          | N_Shore | 0.088±0.056 | 0.26±0.211  | -0.173 | 4.06E-03 | 3.31E-07 | -0.248 |
| cg14540150  | 10 | 126849760 | CTBP2   | TSS1500          | Island  | 0.183±0.159 | 0.355±0.201 | -0.172 | 3.12E-02 | 3.54E-10 | -0.303 |
| cg07833467  | 22 | 50986511  | KLHDC7B | 1st exon         | Island  | 0.591±0.087 | 0.763±0.119 | -0.172 | 6.12E-04 | 3.95E-06 | -0.225 |
| cg23153655  | 2  | 10220816  | CYS1    | TSS1500          | Island  | 0.39±0.166  | 0.562±0.186 | -0.172 | 3.26E-02 | 5.88E-08 | -0.263 |
| cg05766251  | 17 | 37024760  | LASP1   | TSS1500          | N_Shore | 0.219±0.037 | 0.391±0.194 | -0.172 | 1.75E-03 | 3.69E-08 | -0.267 |
| cg27366007  | 15 | 91479184  | UNC45A  | 5'UTR            | S_Shelf | 0.456±0.143 | 0.628±0.146 | -0.172 | 1.38E-02 | 1.24E-12 | -0.340 |
| cg03043696  | 1  | 1820656   | GNB1    | 5'UTR/1st intron | N_Shore | 0.393±0.085 | 0.565±0.141 | -0.172 | 9.13E-04 | 8.65E-09 | -0.279 |
| cg26215406  | 3  | 182972625 | B3GN75  | 5'UTR/1st intron | Island  | 0.472±0.154 | 0.644±0.131 | -0.172 | 1.81E-02 | 2.18E-36 | -0.567 |
| cg18660345  | 20 | 35169539  | MYL9    | TSS1500          | Island  | 0.62±0.039  | 0.792±0.057 | -0.172 | 2.26E-08 | 9.05E-06 | -0.217 |
| cg02010711  | 6  | 31126864  | TCF19   | 5'UTR            | S_Shore | 0.236±0.061 | 0.407±0.192 | -0.172 | 2.29E-03 | 1.78E-11 | -0.323 |
| cg12163132  | 17 | 59475917  | TBX2    | TSS1500          | Island  | 0.596±0.087 | 0.768±0.055 | -0.172 | 4.84E-04 | 7.37E-13 | -0.344 |
| cg12640394  | 10 | 82116596  | DYDC1   | TSS200           | Island  | 0.48±0.106  | 0.652±0.179 | -0.172 | 5.99E-03 | 1.46E-07 | -0.255 |
| cg04585816  | 1  | 40255010  | BMP8B   | TSS1500          | Island  | 0.085±0.077 | 0.257±0.235 | -0.172 | 1.07E-02 | 1.99E-05 | -0.208 |
| cg16116973  | 20 | 33759608  | PROCR   | TSS200           | N_Shelf | 0.32±0.076  | 0.492±0.098 | -0.172 | 1.50E-04 | 6.66E-07 | -0.242 |
| cg04411841  | 16 | 58033649  | ZNF319  | 5'UTR/1st exon   | N_Shore | 0.309±0.074 | 0.48±0.165  | -0.172 | 1.22E-03 | 5.42E-06 | -0.222 |
| cg06362282  | 6  | 33245893  | B3GALT4 | 1st exon         | S_Shore | 0.559±0.078 | 0.731±0.068 | -0.172 | 1.76E-04 | 2.68E-06 | -0.229 |
| cg16684661  | 8  | 80678770  | HEY1    | TSS200           | S_Shore | 0.522±0.138 | 0.694±0.142 | -0.171 | 1.17E-02 | 3.05E-14 | -0.363 |
| cg03664992  | 1  | 39957393  | BMP8A   | 5'UTR/1st exon   | Island  | 0.439±0.061 | 0.611±0.121 | -0.171 | 7.82E-05 | 3.59E-07 | -0.248 |
| cg27024876  | 19 | 49867109  | TEAD2   | TSS1500          | S_Shore | 0.188±0.096 | 0.359±0.218 | -0.171 | 1.03E-02 | 1.77E-13 | -0.352 |
| cg26687670  | 1  | 241804939 | OPN3    | TSS1500          | S_Shore | 0.656±0.153 | 0.828±0.074 | -0.171 | 1.58E-02 | 5.36E-40 | -0.590 |
| cg16627090  | 7  | 44105050  | PGAM2   | 1st exon         | Island  | 0.497±0.145 | 0.668±0.19  | -0.171 | 2.20E-02 | 5.53E-14 | -0.359 |
| cg24703660  | 18 | 21719549  | CABYR   | 5'UTR/1st intron | Island  | 0.371±0.153 | 0.543±0.214 | -0.171 | 3.24E-02 | 8.34E-08 | -0.260 |
| cg027026867 | 4  | 10119810  | WDR1    | TSS1500          | S_Shore | 0.649±0.097 | 0.82±0.039  | -0.171 | 1.33E-03 | 2.52E-14 | -0.364 |
| cg23613162  | 1  | 27891416  | AHDC1   | 5'UTR/1st intron | N_Shelf | 0.553±0.07  | 0.724±0.063 | -0.171 | 6.26E-05 | 2.38E-12 | -0.336 |
| cg02849309  | 6  | 144386280 | PLAGL1  | TSS1500          | S_Shore | 0.595±0.067 | 0.767±0.164 | -0.171 | 9.35E-04 | 2.41E-08 | -0.271 |
| cg00948524  | 17 | 29297757  | RNF135  | TSS200           | N_Shore | 0.463±0.118 | 0.634±0.158 | -0.171 | 6.90E-03 | 4.94E-05 | -0.670 |
| cg08662052  | 19 | 44764603  | ZNF233  | 5'UTR/1st intron | S_Shore | 0.625±0.144 | 0.796±0.115 | -0.171 | 1.28E-02 | 5.75E-25 | -0.479 |
| cg13556663  | 20 | 1246777   | SNPH    | TSS200           | Island  | 0.225±0.137 | 0.396±0.19  | -0.171 | 1.81E-02 | 2.75E-10 | -0.304 |
| cg02533787  | 2  | 149895023 | LYPD6B  | 5'UTR/1st exon   | Island  | 0.233±0.116 | 0.403±0.217 | -0.171 | 1.61E-02 | 6.97E-06 | -0.219 |
| cg16139227  | 12 | 123451304 | ABC89   | TSS1500          | S_Shore | 0.167±0.071 | 0.338±0.212 | -0.171 | 5.66E-03 | 3.72E-07 | -0.247 |
| cg04453471  | 10 | 30726531  | MAP3K8  | 5'UTR            | S_Shelf | 0.325±0.105 | 0.496±0.265 | -0.171 | 2.72E-02 | 1.07E-30 | -0.526 |
| cg09061993  | 1  | 211499620 | TRAF5   | TSS1500          | N_Shore | 0.679±0.107 | 0.85±0.035  | -0.171 | 2.45E-03 | 5.94E-07 | -0.243 |
| cg15999165  | 5  | 102201421 | PAM     | 5'UTR/1st intron | N_Shore | 0.341±0.118 | 0.512±0.144 | -0.171 | 5.79E-03 | 1.81E-08 | -0.273 |
| cg04012924  | 11 | 13690702  | FAR1    | 5'UTR/1st intron | Island  | 0.304±0.144 | 0.474±0.199 | -0.170 | 2.36E-02 | 1.28E-14 | -0.367 |
| cg02695343  | 12 | 6881595   | LAG3    | TSS200           | N_Shore | 0.496±0.121 | 0.666±0.088 | -0.170 | 4.71E-03 | 4.72E-12 | -0.332 |
| cg27350307  | 19 | 8567502   | PRAM1   | 5'UTR/1st exon   | S_Shelf | 0.477±0.116 | 0.648±0.113 | -0.170 | 3.98E-03 | 2.77E-13 | -0.350 |
| cg17690322  | 11 | 67206434  | PTPRCAP | TSS1500          | S_Shelf | 0.612±0.083 | 0.782±0.048 | -0.170 | 3.86E-04 | 3.88E-34 | -0.551 |
| cg19839655  | 20 | 44746499  | CD40    | TSS1500          | N_Shore | 0.112±0.09  | 0.282±0.184 | -0.170 | 4.28E-03 | 6.68E-10 | -0.298 |
| cg10090650  | 6  | 24357732  | DCDC2   | 1st exon         | N_Shelf | 0.544±0.143 | 0.715±0.18  | -0.170 | 1.94E-02 | 1.02E-17 | -0.405 |
| cg10090650  | 6  | 24357732  | KAAG1   | 5'UTR/1st exon   | N_Shelf | 0.544±0.143 | 0.715±0.18  | -0.170 | 1.94E-02 | 3.70E-11 | -0.318 |
| cg26253438  | 1  | 203598623 | ATP2B4  | 5'UTR/1st intron | Island  | 0.52±0.066  | 0.69±0.066  | -0.170 | 3.55E-05 | 1.14E-05 | -0.214 |
| cg24910675  | 9  | 130616917 | ENG     | 5'UTR/1st exon   | S_Shore | 0.381±0.138 | 0.551±0.144 | -0.170 | 1.25E-02 | 3.25E-15 | -0.375 |
| cg26954736  | 11 | 73693896  | UCP2    | TSS200           | Island  | 0.37±0.103  | 0.54±0.114  | -0.170 | 1.89E-03 | 8.43E-09 | -0.279 |
| cg13934236  | 22 | 43507609  | BIK     | 5'UTR/1st intron | S_Shore | 0.627±0.082 | 0.797±0.071 | -0.170 | 2.84E-04 | 1.29E-21 | -0.447 |
| cg15353612  | 4  | 52904965  | SGCB    | TSS1500          | S_Shore | 0.382±0.168 | 0.552±0.119 | -0.170 | 2.68E-02 | 1.96E-06 | -0.232 |
| cg13583230  | 14 | 24809297  | RIPK3   | TSS200           | S_Shore | 0.455±0.119 | 0.625±0.105 | -0.170 | 4.61E-03 | 9.17E-31 | -0.527 |
| cg15311822  | 2  | 9144618   | MBOAT2  | TSS1500          | Island  | 0.507±0.107 | 0.677±0.099 | -0.170 | 2.27E-03 | 4.81E-22 | -0.451 |
| cg15790214  | 6  | 26522325  | HCG11   | 1st exon         | Island  | 0.627±0.068 | 0.797±0.051 | -0.170 | 6.18E-05 | 5.80E-39 | -0.584 |
| cg08328777  | 15 | 45422004  | DUOX1   | TSS200           | Island  | 0.65±0.077  | 0.82±0.063  | -0.170 | 1.82E-04 | 1.52E-05 | -0.211 |
| cg08328777  | 15 | 45422004  | DUOX1   | 5'UTR/1st intron | Island  | 0.65±0.077  | 0.82±0.063  | -0.170 | 1.82E-04 | 1.55E-05 | -0.211 |
| cg21838979  | 2  | 106681945 | C2orf40 | TSS200           | N_Shore | 0.526±0.112 | 0.695±0.074 | -0.170 | 2.94E-03 | 2.11E-10 | -0.306 |
| cg02520639  | 8  | 82021210  | PAG1    | 5'UTR/1st intron | N_Shelf | 0.352±0.11  | 0.521±0.257 | -0.170 | 2.71E-02 | 7.73E-11 | -0.313 |
| cg22162872  | 2  | 191272697 | MFS06   | TSS1500          | Island  | 0.042±0.014 | 0.211±0.209 | -0.170 | 3.19E-03 | 3.67E-06 | -0.226 |
| cg23484599  | 11 | 31831137  | PAX6    | 5'UTR            | S_Shelf | 0.683±0.163 | 0.852±0.042 | -0.169 | 2.20E-02 | 1.69E-17 | -0.403 |
| cg11298343  | 19 | 41306150  | EGLN2   | 5'UTR/1st intron | S_Shore | 0.285±0.102 | 0.454±0.168 | -0.169 | 4.61E-03 | 8.25E-11 | -0.313 |
| cg10414736  | 6  | 26521747  | HCG11   | TSS200           | N_Shore | 0.266±0.104 | 0.435±0.197 | -0.169 | 9.01E-03 | 3.68E-14 | -0.361 |
| cg14112356  | 21 | 46348443  | ITGB2   | 5'UTR/1st intron | N_Shelf | 0.381±0.164 | 0.55±0.182  | -0.169 | 3.31E-02 | 1.03E-05 | -0.215 |
| cg19279042  | 6  | 31550090  | LTB     | 1st exon         | S_Shore | 0.493±0.088 | 0.661±0.115 | -0.169 | 7.03E-04 | 2.82E-14 | -0.363 |
| cg09547767  | 1  | 39957387  | BMP8A   | 5'UTR/1st exon   | Island  | 0.261±0.054 | 0.429±0.1   | -0.169 | 1.25E-05 | 1.29E-05 | -0.213 |
| cg10853949  | 17 | 80290217  | SECTM1  | 5'UTR/1st intron | N_Shore | 0.662±0.172 | 0.831±0.065 | -0.169 | 2.78E-02 | 5.62E-14 | -0.359 |
| cg01117549  | 5  | 137668198 | CDC25C  | TSS1500          | S_Shore | 0.334±0.153 | 0.502±0.209 | -0.169 | 3.30E-02 | 3.02E-06 | -0.228 |
| cg23905216  | 11 | 2161390   | IGF2    | 5'UTR            | Island  | 0.58±0.075  | 0.748±0.085 | -0.168 | 1.37E-04 | 7.78E-19 | -0.418 |
| cg23323669  | 6  | 31126866  | TCF19   | 5'UTR            | S_Shore | 0.125±0.068 | 0.293±0.229 | -0.168 | 9.17E-03 | 6.65E-15 | -0.371 |
| cg01278873  | 19 | 44764101  | ZNF233  | 5'UTR/1st exon   | Island  | 0.504±0.144 | 0.672±0.12  | -0.168 | 1.40E-02 | 1.26E-24 | -0.475 |
| cg25186143  | 17 | 635064    | FAM57A  | TSS1500          | N_Shore | 0.349±0.134 | 0.518±0.162 | -0.168 | 1.37E-02 | 1.33E-05 | -0.213 |
| cg15391574  | 11 | 134201993 | GLB1L2  | 1st exon         | Island  | 0.435±0.176 | 0.603±0.126 | -0.168 | 3.38E-02 | 3.38E-08 | -0.268 |
| cg07644807  | 16 | 88769854  | RNF166  | 5'UTR/1st exon   | N_Shelf | 0.475±0.095 | 0.644±0.05  | -0.168 | 1.13E-03 | 1.25E-12 | -0.340 |
| cg01481646  | 10 | 82217548  | TSPAN14 | 5'UTR/1st intron | S_Shelf | 0.457±0.092 | 0.625±0.091 | -0.168 | 7.87E-04 | 6.86E-20 | -0.429 |
| cg22802813  | 12 | 95942761  | USP44   | 5'UTR/1st intron | Island  | 0.502±0.099 | 0.67±0.105  | -0.168 | 1.44E-03 | 2.66E-14 | -0.363 |
| cg04671742  | 12 | 6881997   | LAG3    | 5'UTR/1st exon   | N_Shore | 0.68±0.088  | 0.848±0.03  | -0.168 | 8.57E-04 | 4.37E-29 | -0.513 |
| cg10137837  | 17 | 6926742   | BCL6B   | 5'UTR/1st intron | Island  | 0.509±0.083 | 0.677±0.056 | -0.168 | 3.78E-04 | 1.11E-07 | -0.258 |
| cg01570972  | 2  | 10090656  | GRHL1   | TSS1500          | N_Shore | 0.52±0.095  | 0.688±0.167 | -0.168 | 3.73E-03 | 4.18E-06 | -0.225 |
| cg08858210  | 8  | 98290361  | TSPYL5  | TSS200           | Island  | 0.449±0.058 | 0.617±0.06  | -0.168 | 9.95E-06 | 7.94E-17 | -0.395 |
| cg06981309  | 3  | 146260954 | PLSCR1  | 5'UTR/1st intron | N_Shore | 0.409±0.144 | 0.577±0.204 | -0.168 | 2.71E-02 | 3.33E-31 | -0.530 |
| cg03328639  | 12 | 123451280 | ABC89   | TSS1500          | S_Shore | 0.185±0.097 | 0.353±0.171 | -0.168 | 4.36E-03 | 8.00E-09 | -0.279 |
| cg23752828  | 12 | 57941309  | DCTN2   | TSS1500          | S_Shore | 0.402±0.153 | 0.57±0.221  | -0.168 | 3.72E-02 | 8.44E-07 | -0.240 |

|            |    |           |                 |                  |         |             |             |        |          |          |        |
|------------|----|-----------|-----------------|------------------|---------|-------------|-------------|--------|----------|----------|--------|
| cg13954457 | 5  | 167956819 | <i>FBLL1</i>    | 1st exon         | Island  | 0.57±0.116  | 0.738±0.115 | -0.168 | 4.54E-03 | 7.06E-16 | -0.383 |
| cg14457599 | 17 | 74381214  | <i>SPHK1</i>    | 1st exon         | Island  | 0.149±0.114 | 0.316±0.224 | -0.168 | 1.88E-02 | 4.64E-07 | -0.245 |
| cg07596494 | 2  | 26205095  | <i>KIF3C</i>    | 5'UTR/1st exon   | Island  | 0.233±0.152 | 0.401±0.183 | -0.168 | 2.68E-02 | 2.92E-05 | -0.204 |
| cg11874426 | 11 | 118781731 | <i>BCL9L</i>    | TSS200           | Island  | 0.433±0.138 | 0.601±0.244 | -0.167 | 3.71E-02 | 1.72E-06 | -0.233 |
| cg09970023 | 14 | 61191253  | <i>SIX4</i>     | TSS1500          | S_Shore | 0.477±0.12  | 0.644±0.219 | -0.167 | 2.00E-02 | 7.46E-22 | -0.449 |
| cg16077257 | 15 | 71146853  | <i>LARP6</i>    | TSS1500          | S_Shore | 0.168±0.08  | 0.335±0.158 | -0.167 | 1.63E-03 | 1.42E-09 | -0.293 |
| cg24519393 | 1  | 38470540  | <i>FHL3</i>     | 5'UTR/1st intron | N_Shore | 0.253±0.143 | 0.42±0.259  | -0.167 | 4.61E-02 | 5.27E-26 | -0.488 |
| cg17293195 | 11 | 71237522  | <i>KRTAP5-7</i> | TSS1500          | S_Shelf | 0.521±0.178 | 0.688±0.138 | -0.167 | 3.80E-02 | 8.07E-07 | -0.240 |
| cg11425280 | 12 | 104851172 | <i>CHST11</i>   | 5'UTR/1st exon   | Island  | 0.138±0.114 | 0.305±0.231 | -0.167 | 2.13E-02 | 1.32E-08 | -0.275 |
| cg12229979 | 19 | 17190259  | <i>MYO9B</i>    | 5'UTR/1st intron | S_Shelf | 0.669±0.08  | 0.836±0.04  | -0.167 | 3.94E-04 | 2.40E-06 | -0.230 |
| cg25742326 | 1  | 901449    | <i>PLEKHN1</i>  | TSS1500          | Island  | 0.515±0.072 | 0.682±0.109 | -0.167 | 3.66E-04 | 7.09E-15 | -0.371 |
| cg21618521 | 6  | 33245770  | <i>B3GALT4</i>  | 1st exon         | S_Shore | 0.54±0.09   | 0.706±0.063 | -0.167 | 7.66E-04 | 2.35E-06 | -0.230 |
| cg08126211 | 6  | 24357720  | <i>DCDC2</i>    | 1st exon         | N_Shelf | 0.394±0.153 | 0.561±0.206 | -0.167 | 3.42E-02 | 1.70E-09 | -0.291 |
| cg08126211 | 6  | 24357720  | <i>KAAG1</i>    | 5'UTR/1st exon   | N_Shelf | 0.394±0.153 | 0.561±0.206 | -0.167 | 3.42E-02 | 5.08E-07 | -0.244 |
| cg24433016 | 6  | 80713408  | <i>TTK</i>      | TSS1500          | N_Shore | 0.54±0.142  | 0.707±0.178 | -0.167 | 2.09E-02 | 2.42E-21 | -0.444 |
| cg13879483 | 12 | 95942907  | <i>USP44</i>    | 5'UTR/1st intron | Island  | 0.652±0.122 | 0.818±0.103 | -0.166 | 5.86E-03 | 7.83E-12 | -0.329 |
| cg23468927 | 11 | 67206263  | <i>PTPRCAP</i>  | TSS1500          | S_Shelf | 0.7±0.091   | 0.866±0.052 | -0.166 | 8.73E-04 | 9.98E-41 | -0.594 |
| cg17848515 | 2  | 130940706 | <i>SMPD4</i>    | TSS1500          | S_Shore | 0.583±0.108 | 0.749±0.154 | -0.166 | 5.17E-03 | 2.37E-21 | -0.444 |
| cg20805133 | 2  | 242802192 | <i>PDCD1</i>    | TSS1500          | N_Shelf | 0.208±0.134 | 0.374±0.257 | -0.166 | 4.09E-02 | 2.25E-06 | -0.231 |
| cg22339338 | 1  | 159891638 | <i>TAGLN2</i>   | 5'UTR/1st intron | N_Shelf | 0.575±0.117 | 0.742±0.1   | -0.166 | 4.53E-03 | 3.96E-10 | -0.302 |
| cg04767484 | 15 | 76629104  | <i>ISL2</i>     | 5'UTR/1st exon   | N_Shore | 0.277±0.165 | 0.443±0.19  | -0.166 | 3.88E-02 | 4.46E-07 | -0.246 |
| cg08935125 | 16 | 3068085   | <i>CLDN6</i>    | 5'UTR/1st intron | Island  | 0.658±0.058 | 0.824±0.03  | -0.166 | 3.59E-05 | 1.74E-07 | -0.254 |
| cg18912470 | 4  | 57848125  | <i>POLR2B</i>   | 5'UTR/1st intron | S_Shelf | 0.644±0.093 | 0.81±0.068  | -0.166 | 9.13E-04 | 1.27E-05 | -0.213 |
| cg16397884 | 5  | 132082837 | <i>CNNI2</i>    | TSS1500          | N_Shore | 0.148±0.098 | 0.314±0.184 | -0.166 | 6.60E-03 | 8.10E-10 | -0.297 |
| cg17021218 | 10 | 88731069  | <i>AGAP11</i>   | 5'UTR/1st intron | S_Shelf | 0.464±0.117 | 0.63±0.161  | -0.166 | 8.27E-03 | 1.30E-05 | -0.213 |
| cg22790377 | 1  | 228291668 | <i>C1orf35</i>  | TSS1500          | N_Shelf | 0.413±0.142 | 0.579±0.251 | -0.166 | 4.41E-02 | 1.07E-06 | -0.238 |
| cg06712013 | 12 | 49759545  | <i>SPAT52</i>   | TSS1500          | N_Shore | 0.597±0.08  | 0.762±0.092 | -0.166 | 3.03E-04 | 1.44E-12 | -0.339 |
| cg01529538 | 14 | 23388837  | <i>RBM23</i>    | TSS1500          | Island  | 0.008±0.008 | 0.174±0.202 | -0.166 | 2.84E-03 | 2.41E-13 | -0.350 |
| cg16731157 | 1  | 24830054  | <i>RCAN3</i>    | 5'UTR/1st intron | S_Shore | 0.125±0.053 | 0.291±0.243 | -0.166 | 1.23E-02 | 1.11E-20 | -0.437 |
| cg03840504 | 3  | 122296369 | <i>PARP15</i>   | TSS200           | N_Shore | 0.289±0.139 | 0.455±0.195 | -0.166 | 2.36E-02 | 1.71E-14 | -0.366 |
| cg07844764 | 11 | 64107517  | <i>CCDC88B</i>  | TSS200           | N_Shelf | 0.609±0.116 | 0.774±0.075 | -0.166 | 4.25E-03 | 5.08E-22 | -0.451 |
| cg13023677 | 5  | 137675418 | <i>FAM53C</i>   | 5'UTR/1st intron | S_Shore | 0.644±0.089 | 0.81±0.069  | -0.166 | 7.21E-04 | 3.75E-06 | -0.226 |
| cg19872463 | 12 | 6881629   | <i>LAG3</i>     | TSS200           | N_Shore | 0.542±0.141 | 0.708±0.123 | -0.166 | 1.42E-02 | 1.71E-11 | -0.324 |
| cg02298570 | 19 | 2840764   | <i>ZNF555</i>   | TSS1500          | N_Shore | 0.307±0.102 | 0.472±0.151 | -0.165 | 3.89E-03 | 1.29E-09 | -0.293 |
| cg12914657 | 7  | 150413680 | <i>GIMAP1</i>   | 5'UTR/1st exon   | N_Shelf | 0.384±0.107 | 0.55±0.137  | -0.165 | 3.94E-03 | 5.82E-10 | -0.299 |
| cg03427543 | 2  | 18060490  | <i>KCNS3</i>    | 5'UTR/1st intron | Island  | 0.072±0.092 | 0.237±0.249 | -0.165 | 2.33E-02 | 2.71E-05 | -0.205 |
| cg07639783 | 7  | 1610747   | <i>PSMG3</i>    | TSS1500          | S_Shore | 0.427±0.105 | 0.592±0.234 | -0.165 | 2.32E-02 | 2.07E-06 | -0.231 |
| cg04375036 | 12 | 111181819 | <i>PPP1CC</i>   | TSS1500          | S_Shore | 0.639±0.187 | 0.804±0.139 | -0.165 | 4.76E-02 | 4.85E-20 | -0.431 |
| cg16352928 | 12 | 6881590   | <i>LAG3</i>     | TSS200           | N_Shore | 0.488±0.112 | 0.654±0.104 | -0.165 | 3.62E-03 | 1.68E-09 | -0.291 |
| cg11305121 | 2  | 121011590 | <i>RALB</i>     | 5'UTR/1st intron | S_Shore | 0.49±0.125  | 0.655±0.134 | -0.165 | 8.47E-03 | 3.05E-06 | -0.228 |
| cg12812165 | 14 | 51296728  | <i>NIN</i>      | 5'UTR            | Island  | 0.16±0.073  | 0.325±0.179 | -0.165 | 2.72E-03 | 1.16E-09 | -0.294 |
| cg15526708 | 9  | 101866433 | <i>TGFBF1</i>   | TSS1500          | N_Shore | 0.438±0.132 | 0.603±0.126 | -0.165 | 1.07E-02 | 4.02E-05 | -0.201 |
| cg12210293 | 7  | 150413801 | <i>GIMAP1</i>   | 5'UTR/1st intron | N_Shelf | 0.466±0.143 | 0.631±0.101 | -0.165 | 1.39E-02 | 4.88E-20 | -0.431 |
| cg04462652 | 2  | 133429088 | <i>LYPD1</i>    | 5'UTR/1st exon   | S_Shore | 0.155±0.081 | 0.32±0.158  | -0.165 | 1.89E-03 | 9.36E-10 | -0.296 |
| cg16479173 | 11 | 47290859  | <i>MADD</i>     | TSS1500          | N_Shore | 0.182±0.112 | 0.347±0.191 | -0.165 | 1.19E-02 | 1.16E-07 | -0.257 |
| cg20449614 | 8  | 22438122  | <i>PDLM2</i>    | 1st exon         | S_Shore | 0.384±0.129 | 0.549±0.188 | -0.165 | 1.78E-02 | 5.55E-13 | -0.345 |
| cg14967066 | 11 | 314341    | <i>IFITM1</i>   | 1st exon         | S_Shelf | 0.377±0.119 | 0.542±0.208 | -0.165 | 1.81E-02 | 2.62E-35 | -0.559 |
| cg24605046 | 6  | 33245895  | <i>B3GALT4</i>  | 1st exon         | S_Shore | 0.474±0.086 | 0.638±0.078 | -0.164 | 5.58E-04 | 1.77E-05 | -0.210 |
| cg06784108 | 13 | 107187232 | <i>EFNB2</i>    | 1st exon         | Island  | 0.402±0.157 | 0.566±0.208 | -0.164 | 4.03E-02 | 1.42E-06 | -0.235 |
| cg15254238 | 10 | 70321874  | <i>TET1</i>     | 5'UTR/1st intron | S_Shore | 0.564±0.108 | 0.728±0.104 | -0.164 | 3.16E-03 | 1.40E-09 | -0.293 |
| cg08873266 | 1  | 40255052  | <i>BMP8B</i>    | TSS1500          | Island  | 0.224±0.052 | 0.388±0.177 | -0.164 | 1.55E-03 | 1.15E-06 | -0.237 |
| cg26250609 | 11 | 67351273  | <i>GSTP1</i>    | 5'UTR/1st exon   | Island  | 0.502±0.137 | 0.666±0.063 | -0.164 | 1.15E-02 | 4.97E-22 | -0.451 |
| cg23764381 | 10 | 116852687 | <i>ATRNL1</i>   | TSS1500          | Island  | 0.125±0.098 | 0.288±0.222 | -0.164 | 1.52E-02 | 7.25E-06 | -0.219 |
| cg12668155 | 11 | 12031113  | <i>DKK3</i>     | TSS1500          | S_Shore | 0.234±0.076 | 0.398±0.092 | -0.164 | 2.07E-04 | 8.22E-12 | -0.328 |
| cg05003422 | 1  | 85513889  | <i>MCOLN3</i>   | 5'UTR/1st intron | Island  | 0.171±0.148 | 0.335±0.221 | -0.164 | 3.80E-02 | 9.69E-06 | -0.216 |
| cg08684361 | 6  | 30852823  | <i>DDR1</i>     | 5'UTR            | S_Shore | 0.161±0.056 | 0.324±0.186 | -0.164 | 2.50E-03 | 3.35E-08 | -0.268 |
| cg01527459 | 10 | 82116571  | <i>YDCC1</i>    | TSS200           | Island  | 0.533±0.074 | 0.697±0.18  | -0.163 | 3.18E-03 | 2.18E-13 | -0.351 |
| cg18693051 | 19 | 1161800   | <i>SBNO2</i>    | 5'UTR/1st intron | S_Shelf | 0.679±0.183 | 0.842±0.075 | -0.163 | 4.07E-02 | 6.92E-12 | -0.329 |
| cg09854317 | 12 | 123754235 | <i>CDK2AP1</i>  | 5'UTR/1st intron | N_Shore | 0.601±0.123 | 0.765±0.098 | -0.163 | 6.87E-03 | 3.83E-14 | -0.361 |
| cg17518962 | 7  | 99766552  | <i>GAL3ST4</i>  | TSS200           | N_Shelf | 0.31±0.097  | 0.473±0.166 | -0.163 | 4.91E-03 | 3.15E-06 | -0.227 |
| cg11216632 | 1  | 155944655 | <i>ARHGGEF2</i> | 5'UTR/1st intron | N_Shelf | 0.594±0.122 | 0.757±0.053 | -0.163 | 6.45E-03 | 3.92E-18 | -0.410 |
| cg00487737 | 19 | 11689726  | <i>ACP5</i>     | 5'UTR/1st exon   | Island  | 0.343±0.11  | 0.506±0.153 | -0.163 | 6.26E-03 | 5.60E-22 | -0.450 |
| cg00726615 | 3  | 113252640 | <i>SIDT1</i>    | 5'UTR/1st intron | S_Shore | 0.25±0.108  | 0.413±0.179 | -0.163 | 9.23E-03 | 1.91E-11 | -0.323 |
| cg05452899 | 11 | 2161133   | <i>IGF2</i>     | 5'UTR            | Island  | 0.61±0.078  | 0.773±0.048 | -0.163 | 3.52E-04 | 8.33E-21 | -0.439 |
| cg22776856 | 16 | 3072572   | <i>THOC6</i>    | TSS1500          | N_Shore | 0.506±0.135 | 0.669±0.153 | -0.163 | 1.56E-02 | 1.81E-10 | -0.307 |
| cg26126806 | 17 | 17685031  | <i>RAI1</i>     | 5'UTR            | Island  | 0.54±0.112  | 0.703±0.093 | -0.163 | 3.81E-03 | 3.23E-05 | -0.203 |
| cg26173997 | 4  | 76555856  | <i>CDKL2</i>    | TSS200           | Island  | 0.445±0.117 | 0.608±0.109 | -0.163 | 5.56E-03 | 3.92E-05 | -0.201 |
| cg19266578 | 20 | 62711729  | <i>OPRL1</i>    | 5'UTR/1st intron | N_Shelf | 0.432±0.161 | 0.595±0.144 | -0.163 | 3.03E-02 | 1.13E-15 | -0.381 |
| cg19266578 | 20 | 62711729  | <i>RGS19</i>    | TSS1500          | N_Shelf | 0.432±0.161 | 0.595±0.144 | -0.163 | 3.03E-02 | 2.06E-13 | -0.351 |
| cg19428417 | 16 | 66959729  | <i>RRAD</i>     | TSS1500          | S_Shelf | 0.524±0.065 | 0.686±0.144 | -0.163 | 5.96E-04 | 3.12E-11 | -0.320 |
| cg26542660 | 4  | 56813860  | <i>CEP135</i>   | TSS1500          | N_Shore | 0.391±0.066 | 0.554±0.196 | -0.162 | 4.58E-03 | 5.14E-07 | -0.244 |
| cg04777348 | 1  | 92952897  | <i>GFI1</i>     | TSS1500          | S_Shore | 0.678±0.086 | 0.841±0.057 | -0.162 | 6.96E-04 | 1.54E-18 | -0.415 |
| cg00588297 | 2  | 74753691  | <i>DQX1</i>     | TSS1500          | N_Shelf | 0.561±0.075 | 0.723±0.074 | -0.162 | 1.91E-04 | 6.49E-17 | -0.396 |
| cg22243039 | 17 | 42147465  | <i>G6PC3</i>    | TSS1500          | N_Shore | 0.491±0.068 | 0.653±0.108 | -0.162 | 1.49E-04 | 3.75E-06 | -0.226 |
| cg03989260 | 1  | 119529360 | <i>TBX15</i>    | 5'UTR/1st intron | N_Shore | 0.47±0.107  | 0.633±0.127 | -0.162 | 3.90E-03 | 4.93E-06 | -0.223 |
| cg06697536 | 2  | 177053496 | <i>HOXD1</i>    | 5'UTR/1st exon   | Island  | 0.398±0.14  | 0.56±0.212  | -0.162 | 3.18E-02 | 2.19E-06 | -0.231 |
| cg07318313 | 9  | 130616620 | <i>ENG</i>      | 1st exon         | Island  | 0.473±0.094 | 0.635±0.056 | -0.162 | 1.31E-03 | 8.25E-24 | -0.468 |
| cg22038579 | 12 | 8849964   | <i>RIMKLB</i>   | 5'UTR/1st intron | Island  | 0.147±0.086 | 0.309±0.234 | -0.162 | 1.67E-02 | 3.96E-05 | -0.201 |
| cg18233405 | 8  | 98290148  | <i>TSPYL5</i>   | 5'UTR/1st exon   | Island  | 0.423±0.066 | 0.585±0.098 | -0.162 | 8.40E-05 | 7.55E-11 | -0.314 |
| cg24156149 | 2  | 197033988 | <i>STK17B</i>   | 5'UTR/1st intron | N_Shore | 0.479±0.099 | 0.641±0.106 | -0.162 | 2.03E-03 | 6.33E-16 | -0.384 |
| cg15904523 | 19 | 44763979  | <i>ZNF233</i>   | TSS200           | Island  | 0.488±0.166 | 0.649±0.16  | -0.162 | 3.75E-02 | 4.25E-16 | -0.386 |
| cg15611336 | 15 | 75248496  | <i>RPP25</i>    | 1st exon         | N_Shelf | 0.405±0.16  | 0.567±0.172 | -0.162 | 3.58E-02 | 5.84E-15 | -0.372 |
| cg01555853 | 2  | 18059744  | <i>KCNS3</i>    | 5'UTR/1st intron | Island  | 0.156±0.136 | 0.317±0.217 | -0.162 | 3.19E-02 | 3.34E-08 | -0.268 |
| cg00074818 | 8  | 8560427   | <i>CLDN23</i>   | 1st exon         | Island  | 0.595±0.132 | 0.756±0.065 | -0.161 | 1.02E-02 | 5.70E-07 | -0.243 |
| cg22056218 | 11 | 63973536  | <i>FERMT3</i>   | TSS1500          |         |             |             |        |          |          |        |

|            |    |           |                 |                  |         |             |             |        |          |          |        |
|------------|----|-----------|-----------------|------------------|---------|-------------|-------------|--------|----------|----------|--------|
| cg07971674 | 14 | 23388846  | <i>RBM23</i>    | TSS1500          | Island  | 0.032±0.01  | 0.193±0.182 | -0.161 | 1.59E-03 | 9.89E-13 | -0.342 |
| cg15962197 | 1  | 41704561  | <i>SCMH1</i>    | 5'UTR/1st intron | N_Shelf | 0.409±0.063 | 0.57±0.15   | -0.161 | 7.80E-04 | 1.62E-06 | -0.234 |
| cg14052210 | 6  | 26521980  | <i>HCG11</i>    | 1st exon         | Island  | 0.514±0.079 | 0.674±0.088 | -0.161 | 3.21E-04 | 3.63E-28 | -0.506 |
| cg18566594 | 12 | 4381435   | <i>CEND2</i>    | TSS1500          | Island  | 0.349±0.162 | 0.51±0.178  | -0.161 | 3.95E-02 | 3.87E-05 | -0.201 |
| cg14221550 | 8  | 120220050 | <i>MAL2</i>     | TSS1500          | N_Shore | 0.269±0.12  | 0.43±0.235  | -0.161 | 3.06E-02 | 5.47E-06 | -0.222 |
| cg04233664 | 10 | 126848743 | <i>CTBP2</i>    | 5'UTR/1st intron | Island  | 0.166±0.147 | 0.327±0.225 | -0.161 | 4.32E-02 | 9.99E-07 | -0.238 |
| cg17602126 | 1  | 40105687  | <i>HEY1</i>     | TSS1500          | Island  | 0.615±0.145 | 0.775±0.151 | -0.160 | 2.20E-02 | 1.70E-05 | -0.210 |
| cg07903144 | 6  | 33358872  | <i>KIFC1</i>    | TSS1500          | N_Shore | 0.682±0.099 | 0.843±0.046 | -0.160 | 2.10E-03 | 4.52E-06 | -0.224 |
| cg08159663 | 16 | 57022486  | <i>NLR3</i>     | TSS1500          | N_Shore | 0.347±0.133 | 0.508±0.124 | -0.160 | 1.26E-02 | 4.34E-28 | -0.505 |
| cg03662014 | 16 | 29086271  | <i>RRN3P2</i>   | 1st exon         | Island  | 0.567±0.085 | 0.727±0.042 | -0.160 | 7.93E-04 | 9.28E-11 | -0.312 |
| cg24082526 | 19 | 49993125  | <i>RPL13A</i>   | 5'UTR            | S_Shelf | 0.524±0.053 | 0.684±0.173 | -0.160 | 1.65E-03 | 3.46E-15 | -0.375 |
| cg03236948 | 11 | 63997492  | <i>DNAIC4</i>   | TSS1500          | N_Shore | 0.317±0.127 | 0.477±0.162 | -0.160 | 1.47E-02 | 6.00E-08 | -0.263 |
| cg24512005 | 11 | 3014291   | <i>NAP1L4</i>   | TSS1500          | S_Shore | 0.347±0.09  | 0.507±0.181 | -0.160 | 6.28E-03 | 1.95E-09 | -0.290 |
| cg13804575 | 9  | 109626999 | <i>ZNF462</i>   | 5'UTR/1st intron | S_Shelf | 0.544±0.146 | 0.704±0.179 | -0.160 | 2.84E-02 | 1.22E-05 | -0.214 |
| cg01633363 | 17 | 79140589  | <i>AATK</i>     | TSS1500          | S_Shore | 0.436±0.143 | 0.596±0.173 | -0.160 | 2.54E-02 | 1.37E-08 | -0.275 |
| cg01262865 | 16 | 75282094  | <i>BCAR1</i>    | 5'UTR/1st exon   | N_Shelf | 0.426±0.057 | 0.586±0.054 | -0.160 | 1.39E-05 | 1.71E-11 | -0.324 |
| cg10256234 | 11 | 66624034  | <i>LRFN4</i>    | TSS1500          | Island  | 0.506±0.021 | 0.666±0.085 | -0.160 | 2.29E-07 | 3.71E-16 | -0.387 |
| cg21158528 | 1  | 211501629 | <i>TRAF5</i>    | 5'UTR/1st intron | S_Shore | 0.641±0.099 | 0.801±0.059 | -0.160 | 2.04E-03 | 3.27E-06 | -0.227 |
| cg01578324 | 6  | 31704774  | <i>CLIC1</i>    | 5'UTR/1st exon   | N_Shelf | 0.495±0.088 | 0.655±0.105 | -0.160 | 9.62E-04 | 6.71E-21 | -0.440 |
| cg16587838 | 6  | 31704705  | <i>CLIC1</i>    | 5'UTR/1st exon   | N_Shelf | 0.284±0.097 | 0.443±0.17  | -0.160 | 6.97E-03 | 3.36E-24 | -0.472 |
| cg03679581 | 9  | 5304511   | <i>RLN2</i>     | 1st exon         | S_Shore | 0.449±0.132 | 0.609±0.104 | -0.160 | 1.12E-02 | 2.90E-10 | -0.304 |
| cg21096345 | 3  | 32432942  | <i>CMTM7</i>    | TSS1500          | N_Shore | 0.177±0.09  | 0.337±0.197 | -0.160 | 9.15E-03 | 4.49E-15 | -0.373 |
| cg02044612 | 11 | 67772000  | <i>UNC93B1</i>  | TSS1500          | S_Shore | 0.654±0.145 | 0.813±0.074 | -0.160 | 1.68E-02 | 1.32E-10 | -0.310 |
| cg00965469 | 6  | 31649469  | <i>LY6G5C</i>   | TSS1500          | N_Shore | 0.422±0.159 | 0.581±0.177 | -0.160 | 3.76E-02 | 5.70E-07 | -0.243 |
| cg21626848 | 17 | 39969267  | <i>FKBP10</i>   | 5'UTR/1st exon   | S_Shore | 0.557±0.094 | 0.717±0.072 | -0.159 | 1.34E-03 | 6.47E-43 | -0.607 |
| cg21386373 | 3  | 52279602  | <i>PPM1M</i>    | TSS1500          | Island  | 0.181±0.127 | 0.341±0.181 | -0.159 | 1.84E-02 | 1.97E-14 | -0.365 |
| cg13499300 | 19 | 54369556  | <i>MYADM</i>    | 5'UTR/1st exon   | N_Shelf | 0.612±0.083 | 0.771±0.062 | -0.159 | 5.44E-04 | 1.04E-07 | -0.258 |
| cg10317807 | 10 | 97804045  | <i>CCNJ</i>     | 5'UTR/1st intron | Island  | 0.234±0.147 | 0.393±0.185 | -0.159 | 3.16E-02 | 5.11E-17 | -0.397 |
| cg10379890 | 6  | 391208    | <i>IRF4</i>     | TSS1500          | Island  | 0.375±0.156 | 0.534±0.173 | -0.159 | 3.50E-02 | 3.37E-07 | -0.248 |
| cg14015211 | 1  | 223315766 | <i>TLR5</i>     | 5'UTR/1st intron | N_Shore | 0.756±0.189 | 0.916±0.053 | -0.159 | 4.90E-02 | 2.11E-17 | -0.402 |
| cg08551725 | 7  | 30029776  | <i>SCRN1</i>    | TSS1500          | Island  | 0.417±0.109 | 0.577±0.182 | -0.159 | 1.18E-02 | 8.28E-08 | -0.260 |
| cg06431702 | 11 | 66624841  | <i>LRFN4</i>    | 5'UTR/1st intron | Island  | 0.492±0.123 | 0.651±0.159 | -0.159 | 1.31E-02 | 4.25E-20 | -0.431 |
| cg02937671 | 4  | 2366485   | <i>ZFYVE28</i>  | 5'UTR/1st exon   | Island  | 0.62±0.073  | 0.778±0.117 | -0.159 | 4.03E-04 | 3.33E-08 | -0.268 |
| cg18085627 | 11 | 64107672  | <i>CDC88B</i>   | TSS200           | N_Shelf | 0.513±0.157 | 0.672±0.16  | -0.159 | 3.35E-02 | 2.36E-07 | -0.251 |
| cg25015733 | 2  | 99342986  | <i>MGAT4A</i>   | 5'UTR            | N_Shelf | 0.522±0.155 | 0.681±0.154 | -0.159 | 3.05E-02 | 3.20E-05 | -0.203 |
| cg05484548 | 16 | 29086428  | <i>RRN3P2</i>   | 1st exon         | Island  | 0.331±0.078 | 0.489±0.057 | -0.159 | 3.61E-04 | 8.80E-09 | -0.279 |
| cg22486834 | 6  | 52859107  | <i>GSTA4</i>    | 5'UTR/1st intron | N_Shore | 0.619±0.087 | 0.777±0.1   | -0.159 | 9.06E-04 | 7.61E-25 | -0.477 |
| cg23973429 | 8  | 102504746 | <i>GRHL2</i>    | 5'UTR/1st exon   | Island  | 0.519±0.071 | 0.678±0.08  | -0.159 | 1.46E-04 | 2.03E-20 | -0.435 |
| cg15801007 | 6  | 131383376 | <i>EPB41L2</i>  | 5'UTR/1st intron | N_Shore | 0.135±0.069 | 0.294±0.221 | -0.159 | 1.14E-02 | 1.38E-10 | -0.310 |
| cg12085570 | 19 | 8674501   | <i>ADAMTS10</i> | 5'UTR/1st intron | Island  | 0.18±0.069  | 0.338±0.295 | -0.159 | 4.35E-02 | 2.89E-13 | -0.349 |
| cg22977317 | 6  | 2842550   | <i>SERPINB1</i> | TSS1500          | S_Shore | 0.603±0.064 | 0.761±0.093 | -0.159 | 6.68E-05 | 5.78E-15 | -0.372 |
| cg23018117 | 7  | 150413687 | <i>GIMAP1</i>   | 5'UTR/1st exon   | N_Shelf | 0.44±0.101  | 0.599±0.085 | -0.159 | 2.38E-03 | 3.15E-17 | -0.400 |
| cg04896949 | 1  | 28918475  | <i>RAB42</i>    | TSS1500          | N_Shore | 0.378±0.107 | 0.537±0.158 | -0.158 | 7.45E-03 | 3.99E-15 | -0.374 |
| cg06976589 | 4  | 1304048   | <i>MAEA</i>     | 5'UTR/1st intron | S_Shore | 0.672±0.136 | 0.831±0.048 | -0.158 | 1.28E-02 | 4.78E-07 | -0.245 |
| cg08806632 | 19 | 13214412  | <i>LYL1</i>     | TSS1500          | N_Shore | 0.586±0.105 | 0.745±0.091 | -0.158 | 3.08E-03 | 5.10E-22 | -0.451 |
| cg12406559 | 18 | 56530302  | <i>ZNF532</i>   | 1st exon         | N_Shore | 0.283±0.097 | 0.442±0.251 | -0.158 | 2.96E-02 | 2.02E-12 | -0.337 |
| cg18972998 | 1  | 55266296  | <i>TTC22</i>    | 1st exon         | Island  | 0.71±0.137  | 0.868±0.121 | -0.158 | 1.53E-02 | 1.90E-17 | -0.402 |
| cg24581462 | 8  | 38759627  | <i>PLEKHA2</i>  | 5'UTR/1st intron | S_Shore | 0.121±0.106 | 0.28±0.157  | -0.158 | 7.09E-03 | 8.37E-15 | -0.370 |
| cg10122302 | 1  | 6051558   | <i>NPHP4</i>    | 5'UTR/1st intron | N_Shore | 0.079±0.035 | 0.237±0.208 | -0.158 | 5.57E-03 | 3.19E-07 | -0.249 |
| cg18588934 | 9  | 132083215 | <i>C9orf106</i> | TSS200           | Island  | 0.055±0.08  | 0.213±0.19  | -0.158 | 6.33E-03 | 3.92E-10 | -0.302 |
| cg06487082 | 18 | 56530106  | <i>ZNF532</i>   | 1st exon         | N_Shore | 0.224±0.08  | 0.382±0.224 | -0.158 | 1.43E-02 | 1.34E-10 | -0.310 |
| cg14228592 | 8  | 145639181 | <i>SLC39A4</i>  | TSS1500          | Island  | 0.552±0.106 | 0.71±0.123  | -0.158 | 4.26E-03 | 2.26E-12 | -0.337 |
| cg13521889 | 19 | 12075705  | <i>ZNF763</i>   | TSS200           | N_Shore | 0.254±0.121 | 0.412±0.199 | -0.158 | 2.12E-02 | 3.10E-26 | -0.490 |
| cg22862003 | 21 | 42797588  | <i>MX1</i>      | 5'UTR            | N_Shore | 0.5±0.12    | 0.658±0.087 | -0.158 | 7.08E-03 | 1.98E-14 | -0.365 |
| cg04907151 | 3  | 135684161 | <i>PPP2R3A</i>  | TSS1500          | N_Shore | 0.571±0.146 | 0.728±0.086 | -0.158 | 1.86E-02 | 2.98E-08 | -0.269 |
| cg14524975 | 12 | 53594856  | <i>ITGB7</i>    | 5'UTR            | S_Shelf | 0.413±0.132 | 0.57±0.136  | -0.157 | 1.49E-02 | 6.41E-10 | -0.298 |
| cg07903023 | 2  | 239048072 | <i>KLHL30</i>   | 5'UTR/1st intron | N_Shore | 0.684±0.042 | 0.842±0.057 | -0.157 | 2.70E-07 | 4.07E-17 | -0.398 |
| cg12832565 | 1  | 145715672 | <i>CD160</i>    | TSS200           | S_Shore | 0.733±0.093 | 0.89±0.03   | -0.157 | 1.82E-03 | 5.00E-17 | -0.397 |
| cg06753439 | 6  | 33245488  | <i>B3GALT4</i>  | 1st exon         | Island  | 0.569±0.066 | 0.726±0.046 | -0.157 | 1.10E-04 | 2.51E-13 | -0.350 |
| cg18668813 | 6  | 114177341 | <i>MARCKS</i>   | TSS1500          | N_Shelf | 0.181±0.135 | 0.338±0.193 | -0.157 | 2.77E-02 | 5.71E-08 | -0.263 |
| cg19982230 | 17 | 27045302  | <i>RAB34</i>    | TSS1500          | N_Shore | 0.454±0.021 | 0.612±0.14  | -0.157 | 1.88E-04 | 1.40E-22 | -0.456 |
| cg23378365 | 5  | 156696351 | <i>CYFIP2</i>   | 5'UTR/1st exon   | S_Shelf | 0.483±0.126 | 0.641±0.142 | -0.157 | 1.27E-02 | 1.01E-11 | -0.327 |
| cg24876187 | 6  | 31126871  | <i>TCF19</i>    | 5'UTR            | S_Shore | 0.181±0.097 | 0.338±0.196 | -0.157 | 1.16E-02 | 9.85E-21 | -0.438 |
| cg04876187 | 6  | 31126871  | <i>CHCHR1</i>   | TSS1500          | S_Shore | 0.181±0.097 | 0.338±0.196 | -0.157 | 1.16E-02 | 1.11E-07 | -0.258 |
| cg14612785 | 3  | 71774842  | <i>EIF4E3</i>   | 5'UTR            | Island  | 0.118±0.085 | 0.275±0.258 | -0.157 | 3.01E-02 | 3.08E-15 | -0.375 |
| cg06688014 | 10 | 111683554 | <i>XPNPPEP1</i> | TSS1500          | S_Shore | 0.341±0.08  | 0.498±0.174 | -0.157 | 4.42E-03 | 4.28E-07 | -0.246 |
| cg14531862 | 19 | 44764205  | <i>ZNF233</i>   | 5'UTR/1st intron | Island  | 0.481±0.096 | 0.638±0.124 | -0.157 | 2.64E-03 | 1.77E-19 | -0.425 |
| cg23612030 | 2  | 96811533  | <i>DUSP2</i>    | TSS1500          | S_Shore | 0.274±0.16  | 0.431±0.193 | -0.157 | 4.55E-02 | 2.23E-05 | -0.207 |
| cg18087326 | 1  | 53067637  | <i>GPX7</i>     | TSS1500          | N_Shore | 0.714±0.065 | 0.871±0.031 | -0.157 | 1.46E-04 | 1.62E-26 | -0.492 |
| cg24905196 | 3  | 121555186 | <i>EAF2</i>     | 5'UTR/1st intron | S_Shore | 0.63±0.078  | 0.787±0.071 | -0.157 | 3.44E-04 | 1.93E-16 | -0.390 |
| cg24905196 | 3  | 121555186 | <i>IQCB1</i>    | TSS1500          | S_Shore | 0.63±0.078  | 0.787±0.071 | -0.157 | 3.44E-04 | 4.55E-08 | -0.265 |
| cg27002699 | 19 | 11689538  | <i>ACPS</i>     | 5'UTR/1st exon   | Island  | 0.242±0.135 | 0.399±0.205 | -0.157 | 3.15E-02 | 6.04E-13 | -0.345 |
| cg11874323 | 3  | 111804830 | <i>C3orf52</i>  | TSS1500          | N_Shore | 0.531±0.111 | 0.688±0.094 | -0.157 | 4.63E-03 | 1.90E-11 | -0.323 |
| cg09554509 | 7  | 27238910  | <i>HOXA13</i>   | 1st exon         | Island  | 0.281±0.104 | 0.438±0.281 | -0.157 | 4.95E-02 | 1.81E-10 | -0.307 |
| cg01716224 | 22 | 40391434  | <i>FAM83F</i>   | 1st exon         | Island  | 0.502±0.068 | 0.659±0.074 | -0.157 | 9.58E-05 | 2.90E-19 | -0.422 |
| cg05384724 | 12 | 124155451 | <i>TCTN2</i>    | TSS1500          | N_Shore | 0.494±0.126 | 0.651±0.179 | -0.157 | 1.96E-02 | 1.31E-07 | -0.256 |
| cg13269555 | 10 | 102822002 | <i>KAZALD1</i>  | 5'UTR/1st intron | N_Shelf | 0.543±0.103 | 0.7±0.16    | -0.157 | 7.25E-03 | 1.34E-48 | -0.639 |
| cg14885762 | 17 | 75446450  | <i>SEPT9</i>    | TSS1500          | N_Shore | 0.378±0.13  | 0.535±0.188 | -0.157 | 2.38E-02 | 5.38E-12 | -0.331 |
| cg23057870 | 8  | 80679111  | <i>HEY1</i>     | TSS1500          | S_Shore | 0.563±0.137 | 0.72±0.173  | -0.157 | 2.44E-02 | 1.63E-17 | -0.403 |
| cg07348922 | 6  | 33244990  | <i>B3GALT4</i>  | 5'UTR/1st exon   | Island  | 0.457±0.163 | 0.613±0.069 | -0.156 | 3.05E-02 | 7.59E-57 | -0.678 |
| cg26434048 | 7  | 45961569  | <i>IGFBP3</i>   | TSS1500          | S_Shore | 0.434±0.115 | 0.591±0.197 | -0.156 | 1.90E-02 | 1.20E-07 | -0.257 |
| cg16536016 | 8  | 38757775  | <i>PLEKHA2</i>  | TSS1500          | N_Shore | 0.419±0.089 | 0.576±0.141 | -0.156 | 2.70E-03 | 4.00E-05 | -0.201 |
| cg23310850 | 19 | 19051337  | <i>HOMER3</i>   | 5'UTR/1st intron | Island  | 0.083±0.053 | 0.239±0.176 | -0.156 | 2.30E-03 | 8.44E-06 | -0.217 |
| cg13399816 | 1  | 68299468  | <i>GNG12</i>    | TSS1500          | S_Shore | 0.353±0.129 | 0.509±0.19  | -0.156 | 2.40E-02 | 4.34E-12 | -0.332 |
| cg10059687 | 1  | 6526129   | <i>TNFRSF25</i> | 1st exon         |         |             |             |        |          |          |        |

|            |    |           |          |                  |         |             |             |        |          |          |        |
|------------|----|-----------|----------|------------------|---------|-------------|-------------|--------|----------|----------|--------|
| cg05204104 | 2  | 235403141 | ARL4C    | 1st exon/3'UTR   | N_Shore | 0.462±0.169 | 0.618±0.157 | -0.156 | 4.55E-02 | 1.27E-14 | -0.368 |
| cg21431832 | 22 | 26875652  | HPS4     | TSS200           | N_Shelf | 0.335±0.128 | 0.491±0.237 | -0.155 | 4.16E-02 | 2.53E-06 | -0.229 |
| cg05758434 | 2  | 207139471 | ZDBF2    | 5'UTR/1st exon   | Island  | 0.174±0.076 | 0.329±0.164 | -0.155 | 3.11E-03 | 2.36E-10 | -0.306 |
| cg22878489 | 6  | 33245701  | B3GALT4  | 1st exon         | S_Shore | 0.671±0.087 | 0.826±0.057 | -0.155 | 1.06E-03 | 7.28E-09 | -0.280 |
| cg02211741 | 11 | 46383924  | BGKZ     | 5'UTR/1st intron | N_Shelf | 0.585±0.081 | 0.74±0.043  | -0.155 | 6.67E-04 | 3.94E-11 | -0.318 |
| cg24886267 | 5  | 167956306 | FBLL1    | 5'UTR/1st exon   | Island  | 0.147±0.159 | 0.302±0.173 | -0.155 | 4.25E-02 | 5.89E-07 | -0.243 |
| cg08678256 | 16 | 30196023  | CORO1A   | 5'UTR            | S_Shore | 0.379±0.096 | 0.534±0.15  | -0.155 | 4.83E-03 | 2.05E-07 | -0.253 |
| cg08545136 | 17 | 76775543  | CYTH1    | 5'UTR/1st intron | N_Shore | 0.406±0.107 | 0.56±0.148  | -0.155 | 7.46E-03 | 1.43E-08 | -0.275 |
| cg25934064 | 3  | 52569026  | NTSDC2   | 5'UTR/1st exon   | S_Shore | 0.573±0.096 | 0.728±0.096 | -0.154 | 2.07E-03 | 1.91E-37 | -0.574 |
| cg00004421 | 17 | 7475079   | EIF4A1   | TSS1500          | N_Shore | 0.429±0.072 | 0.583±0.152 | -0.154 | 1.75E-03 | 9.98E-07 | -0.238 |
| cg12628196 | 7  | 127672458 | LRRCA    | TSS1500          | Island  | 0.592±0.065 | 0.746±0.042 | -0.154 | 1.23E-04 | 5.77E-13 | -0.345 |
| cg00039326 | 1  | 36615845  | TRAPPC3  | 5'UTR/1st intron | S_Shore | 0.595±0.145 | 0.749±0.105 | -0.154 | 2.16E-02 | 3.32E-05 | -0.203 |
| cg22225943 | 11 | 2162536   | IGF2     | 5'UTR            | S_Shore | 0.541±0.116 | 0.695±0.134 | -0.154 | 9.11E-03 | 5.57E-10 | -0.299 |
| cg13937155 | 17 | 1548881   | SCARF1   | 1st exon         | S_Shore | 0.591±0.089 | 0.745±0.051 | -0.154 | 1.31E-03 | 2.20E-12 | -0.337 |
| cg26997028 | 5  | 76012827  | F2R      | 5'UTR/1st intron | S_Shore | 0.56±0.083  | 0.714±0.055 | -0.154 | 7.58E-04 | 1.45E-07 | -0.256 |
| cg12708994 | 6  | 116691460 | DSE      | 5'UTR            | N_Shore | 0.625±0.072 | 0.779±0.078 | -0.154 | 2.11E-04 | 9.93E-17 | -0.394 |
| cg20954977 | 2  | 232260116 | B3GN7    | TSS1500          | Island  | 0.681±0.126 | 0.834±0.064 | -0.154 | 1.02E-02 | 4.06E-12 | -0.333 |
| cg09258150 | 19 | 10397429  | ICAM4    | TSS1500          | N_Shelf | 0.335±0.164 | 0.489±0.132 | -0.153 | 3.91E-02 | 5.22E-07 | -0.244 |
| cg18997901 | 6  | 76461321  | MYO6     | 5'UTR/1st intron | S_Shelf | 0.612±0.143 | 0.765±0.066 | -0.153 | 1.88E-02 | 5.66E-18 | -0.408 |
| cg23878206 | 19 | 50431425  | IL4I1    | 5'UTR/1st intron | N_Shore | 0.604±0.093 | 0.757±0.116 | -0.153 | 2.31E-03 | 2.14E-14 | -0.365 |
| cg23878206 | 19 | 50431425  | NUP62    | 5'UTR/1st intron | N_Shore | 0.604±0.093 | 0.757±0.116 | -0.153 | 2.31E-03 | 2.77E-14 | -0.363 |
| cg22740547 | 11 | 13030876  | RASSF10  | TSS200           | Island  | 0.458±0.139 | 0.611±0.172 | -0.153 | 2.83E-02 | 7.65E-06 | -0.218 |
| cg19670286 | 5  | 137610127 | GFR3     | 5'UTR/1st exon   | Island  | 0.448±0.058 | 0.602±0.058 | -0.153 | 2.91E-05 | 1.55E-20 | -0.436 |
| cg04546041 | 19 | 57863210  | ZNF304   | 5'UTR/1st intron | Island  | 0.346±0.097 | 0.499±0.216 | -0.153 | 2.00E-02 | 1.21E-09 | -0.294 |
| cg21595709 | 19 | 15344186  | EPHX3    | TSS1500          | Island  | 0.418±0.096 | 0.571±0.108 | -0.153 | 2.66E-03 | 3.00E-12 | -0.335 |
| cg14704921 | 4  | 53728654  | RASL11B  | 5'UTR/1st exon   | Island  | 0.305±0.128 | 0.458±0.123 | -0.153 | 1.39E-02 | 3.18E-07 | -0.249 |
| cg25189904 | 1  | 68299493  | GNG12    | TSS1500          | S_Shore | 0.352±0.144 | 0.505±0.206 | -0.153 | 4.26E-02 | 3.61E-12 | -0.334 |
| cg07803420 | 6  | 30851517  | DDR1     | 5'UTR/1st intron | N_Shore | 0.589±0.147 | 0.742±0.085 | -0.152 | 2.25E-02 | 9.95E-35 | -0.555 |
| cg20017995 | 9  | 136216076 | MED22    | TSS1500          | S_Shore | 0.49±0.127  | 0.643±0.172 | -0.152 | 2.12E-02 | 1.22E-17 | -0.404 |
| cg17252884 | 3  | 15369681  | SH3BP5   | 5'UTR            | N_Shelf | 0.513±0.142 | 0.665±0.093 | -0.152 | 1.97E-02 | 4.22E-14 | -0.361 |
| cg26398848 | 2  | 263559    | SH3YL1   | 5'UTR/1st intron | Island  | 0.498±0.122 | 0.65±0.09   | -0.152 | 9.50E-03 | 4.27E-37 | -0.571 |
| cg07894352 | 19 | 44763993  | ZNF233   | TSS200           | Island  | 0.546±0.149 | 0.699±0.143 | -0.152 | 3.05E-02 | 7.86E-30 | -0.519 |
| cg20808711 | 6  | 32160998  | GPSM3    | 5'UTR            | N_Shelf | 0.674±0.045 | 0.826±0.047 | -0.152 | 1.65E-06 | 3.47E-25 | -0.480 |
| cg09645475 | 20 | 815316    | FAM110A  | 5'UTR/1st intron | S_Shore | 0.4±0.104   | 0.552±0.215 | -0.152 | 2.30E-02 | 4.99E-27 | -0.496 |
| cg18080046 | 6  | 31704844  | CLIC1    | 5'UTR/1st exon   | N_Shelf | 0.303±0.087 | 0.454±0.114 | -0.152 | 1.68E-03 | 2.51E-26 | -0.490 |
| cg08144943 | 3  | 52280702  | PPM1M    | 5'UTR/1st intron | S_Shore | 0.459±0.09  | 0.61±0.115  | -0.152 | 2.08E-03 | 1.49E-27 | -0.501 |
| cg19050555 | 12 | 49662405  | TUBA1C   | 5'UTR            | S_Shelf | 0.655±0.107 | 0.806±0.108 | -0.151 | 5.21E-03 | 2.42E-26 | -0.491 |
| cg03852656 | 3  | 186525224 | RFC4     | TSS1500          | S_Shore | 0.375±0.156 | 0.526±0.162 | -0.151 | 4.05E-02 | 2.89E-18 | -0.411 |
| cg22695339 | 17 | 7791630   | CHD3     | TSS1500          | S_Shelf | 0.215±0.05  | 0.366±0.153 | -0.151 | 1.02E-03 | 3.76E-06 | -0.226 |
| cg04590184 | 17 | 29297604  | RNF135   | TSS1500          | N_Shore | 0.448±0.12  | 0.599±0.156 | -0.151 | 1.50E-02 | 1.44E-21 | -0.446 |
| cg25783099 | 2  | 42795486  | MTA3     | 5'UTR            | N_Shore | 0.496±0.131 | 0.647±0.083 | -0.151 | 1.40E-02 | 1.05E-20 | -0.438 |
| cg08808402 | 5  | 115910732 | SEMA6A   | TSS200           | N_Shore | 0.108±0.106 | 0.259±0.188 | -0.151 | 1.63E-02 | 1.80E-05 | -0.210 |
| cg16268214 | 12 | 49351537  | ARF3     | TSS1500          | S_Shore | 0.194±0.142 | 0.344±0.2   | -0.151 | 4.10E-02 | 8.61E-06 | -0.217 |
| cg08916374 | 1  | 145471727 | ANKRD34A | 5'UTR            | N_Shore | 0.44±0.1    | 0.59±0.133  | -0.151 | 5.10E-03 | 8.94E-06 | -0.217 |
| cg01745690 | 7  | 43798100  | BLVRA    | TSS200           | Island  | 0.049±0.077 | 0.2±0.202   | -0.151 | 1.12E-02 | 1.23E-11 | -0.326 |
| cg17630392 | 5  | 32712623  | NPR3     | 1st exon         | Island  | 0.506±0.101 | 0.657±0.118 | -0.151 | 4.27E-03 | 7.76E-06 | -0.218 |
| cg16899892 | 1  | 53528971  | PODN     | 5'UTR/1st intron | Island  | 0.577±0.083 | 0.727±0.035 | -0.150 | 1.09E-03 | 1.89E-14 | -0.365 |
| cg15732851 | 1  | 203598761 | ATP2B4   | 5'UTR/1st intron | Island  | 0.706±0.071 | 0.856±0.039 | -0.150 | 3.40E-04 | 1.20E-06 | -0.236 |
| cg14951292 | 16 | 4525986   | NMRAL1   | 5'UTR/1st intron | S_Shore | 0.456±0.097 | 0.606±0.133 | -0.150 | 4.59E-03 | 5.64E-08 | -0.264 |
| cg10578938 | 5  | 156695410 | CYFIP2   | 5'UTR/1st intron | S_Shore | 0.561±0.11  | 0.712±0.129 | -0.150 | 7.86E-03 | 4.36E-12 | -0.332 |
| cg08296037 | 16 | 1584118   | TMEM204  | 5'UTR            | Island  | 0.583±0.051 | 0.733±0.041 | -0.150 | 1.18E-05 | 1.67E-14 | -0.366 |
| cg11843238 | 5  | 131593191 | PDLIM4   | TSS200           | Island  | 0.426±0.127 | 0.576±0.205 | -0.150 | 3.36E-02 | 3.82E-07 | -0.247 |
| cg11210813 | 20 | 35972385  | SRC      | TSS1500          | N_Shore | 0.532±0.102 | 0.682±0.144 | -0.150 | 6.94E-03 | 7.97E-10 | -0.297 |
| cg06173720 | 7  | 127670993 | LRRCA    | 5'UTR/1st exon   | N_Shore | 0.603±0.071 | 0.753±0.054 | -0.149 | 2.64E-04 | 4.36E-14 | -0.360 |
| cg22166883 | 1  | 24116900  | LYPLA2   | TSS1500          | N_Shore | 0.569±0.102 | 0.719±0.089 | -0.149 | 3.69E-03 | 3.72E-07 | -0.247 |
| cg22322679 | 6  | 33244178  | B3GALT4  | TSS1500          | N_Shore | 0.629±0.069 | 0.779±0.027 | -0.149 | 3.47E-04 | 1.36E-16 | -0.392 |
| cg14121845 | 20 | 25566513  | NINL     | TSS1500          | Island  | 0.299±0.1   | 0.448±0.206 | -0.149 | 2.04E-02 | 1.74E-08 | -0.273 |
| cg23462242 | 5  | 156696185 | CYFIP2   | 5'UTR/1st intron | S_Shelf | 0.661±0.117 | 0.81±0.137  | -0.149 | 1.21E-02 | 6.24E-10 | -0.299 |
| cg17497608 | 7  | 90896701  | FZD1     | 1st exon/3'UTR   | S_Shore | 0.689±0.153 | 0.838±0.057 | -0.149 | 2.89E-02 | 9.12E-07 | -0.239 |
| cg20299697 | 3  | 138069423 | MRAS     | 5'UTR/1st intron | S_Shore | 0.67±0.082  | 0.819±0.093 | -0.149 | 9.21E-04 | 9.89E-32 | -0.534 |
| cg25201101 | 12 | 131355465 | RAN      | TSS1500          | N_Shore | 0.508±0.059 | 0.657±0.129 | -0.149 | 4.77E-04 | 6.13E-12 | -0.330 |
| cg12897901 | 11 | 126225297 | ST3GAL4  | TSS1500          | N_Shore | 0.061±0.042 | 0.21±0.217  | -0.149 | 1.12E-02 | 2.90E-05 | -0.204 |
| cg00891541 | 16 | 68481487  | SMPD3    | 5'UTR/1st intron | Island  | 0.71±0.146  | 0.858±0.09  | -0.149 | 2.47E-02 | 3.85E-11 | -0.318 |
| cg18485193 | 5  | 16936369  | MYO10    | 5'UTR/1st exon   | Island  | 0.401±0.158 | 0.55±0.173  | -0.149 | 4.90E-02 | 1.69E-13 | -0.353 |
| cg00481884 | 19 | 11689867  | ACP5     | TSS1500          | S_Shore | 0.456±0.094 | 0.604±0.152 | -0.149 | 6.19E-03 | 2.96E-25 | -0.481 |
| cg07191594 | 20 | 44650220  | SLC12A5  | TSS200           | N_Shore | 0.362±0.099 | 0.51±0.193  | -0.148 | 1.65E-02 | 3.56E-13 | -0.348 |
| cg15754153 | 2  | 43865055  | PLEKHH2  | 5'UTR/1st intron | S_Shore | 0.106±0.075 | 0.255±0.161 | -0.148 | 3.81E-03 | 4.60E-06 | -0.224 |
| cg24335895 | 19 | 36643771  | COX7A1   | 5'UTR/1st exon   | S_Shore | 0.597±0.079 | 0.745±0.091 | -0.148 | 7.29E-04 | 2.42E-06 | -0.230 |
| cg16164619 | 12 | 57871855  | ARHGAP9  | 5'UTR/1st exon   | S_Shore | 0.286±0.109 | 0.435±0.164 | -0.148 | 1.35E-02 | 8.62E-06 | -0.217 |
| cg02530437 | 17 | 27044745  | RAB34    | 5'UTR/1st exon   | N_Shelf | 0.331±0.116 | 0.479±0.179 | -0.148 | 2.02E-02 | 8.80E-13 | -0.342 |
| cg07968770 | 16 | 21170927  | TMEM159  | 5'UTR/1st intron | S_Shore | 0.511±0.138 | 0.659±0.154 | -0.148 | 2.80E-02 | 2.05E-06 | -0.231 |
| cg14166009 | 19 | 37825309  | HKR1     | 5'UTR            | Island  | 0.532±0.127 | 0.68±0.131  | -0.148 | 1.72E-02 | 2.83E-05 | -0.205 |
| cg15531369 | 19 | 49993157  | RPL13A   | 5'UTR            | S_Shelf | 0.597±0.057 | 0.745±0.124 | -0.148 | 3.62E-04 | 4.11E-15 | -0.374 |
| cg02498311 | 11 | 73020358  | ARHGEF17 | 1st exon         | Island  | 0.262±0.155 | 0.41±0.179  | -0.148 | 4.94E-02 | 2.02E-06 | -0.232 |
| cg19215110 | 6  | 30850913  | DDR1     | 5'UTR/1st intron | N_Shore | 0.584±0.17  | 0.732±0.092 | -0.148 | 4.70E-02 | 4.39E-26 | -0.488 |
| cg21365364 | 20 | 18568287  | DTD1     | TSS1500          | N_Shore | 0.206±0.099 | 0.353±0.203 | -0.148 | 2.00E-02 | 3.97E-08 | -0.266 |
| cg17200690 | 6  | 33245619  | B3GALT4  | 1st exon         | S_Shore | 0.621±0.085 | 0.768±0.033 | -0.147 | 1.52E-03 | 2.84E-06 | -0.228 |
| cg06023994 | 3  | 170137871 | CLDN11   | TSS1500          | Island  | 0.641±0.082 | 0.788±0.072 | -0.147 | 9.20E-04 | 9.22E-11 | -0.312 |
| cg09619347 | 11 | 64107520  | CCDC88B  | TSS200           | N_Shelf | 0.468±0.084 | 0.615±0.132 | -0.147 | 4.18E-03 | 1.33E-08 | -0.275 |
| cg16537028 | 16 | 84853380  | CRISPLD2 | TSS1500          | Island  | 0.273±0.119 | 0.419±0.195 | -0.147 | 2.84E-02 | 9.66E-07 | -0.239 |
| cg25974903 | 1  | 65211057  | RAVER2   | 1st exon         | Island  | 0.137±0.101 | 0.283±0.187 | -0.147 | 1.69E-02 | 1.33E-08 | -0.275 |
| cg01430588 | 17 | 56769767  | RAD51C   | TSS200           | N_Shore | 0.547±0.123 | 0.693±0.154 | -0.146 | 1.93E-02 | 6.12E-07 | -0.243 |
| cg08404227 | 15 | 92397279  | SLCO3A1  | 1st exon         | Island  | 0.066±0.053 | 0.212±0.215 | -0.146 | 1.31E-02 | 3.24E-06 | -0.227 |
| cg27046604 | 15 | 41135869  | SPINT1   | TSS1500          | Island  | 0.402±0.145 | 0.548±0.193 | -0.146 | 4.70E-02 | 2.87E-17 | -0.400 |
| cg00798876 | 7  | 2670978   | TTYH3    | TSS1500          | N_Shore | 0.36±0.104  | 0.506±0.194 | -0.146 | 2.05E-02 | 3.80E-06 | -0.225 |
| cg17402397 | 22 | 31477754  | SMTN     | 5'UTR/1st intron | S_Shore | 0.391±0.142 | 0.537±0.174 | -0.146 | 3.79E-02 | 4.95E-18 | -0.409 |
| cg21959598 | 7  | 55637719  | VOPP1    | 5'UTR/1st intron | N_Shore | 0.449±0.123 | 0           |        |          |          |        |

|            |    |           |                  |                  |         |             |             |        |          |          |        |
|------------|----|-----------|------------------|------------------|---------|-------------|-------------|--------|----------|----------|--------|
| cg01890845 | 11 | 8102475   | <i>TUB</i>       | TSS1500          | Island  | 0.375±0.136 | 0.521±0.157 | -0.146 | 2.93E-02 | 9.65E-08 | -0.259 |
| cg18366919 | 19 | 15344364  | <i>EPHX3</i>     | TSS1500          | Island  | 0.426±0.109 | 0.572±0.159 | -0.146 | 1.40E-02 | 6.22E-09 | -0.281 |
| cg02224002 | 16 | 88769526  | <i>RNF166</i>    | 5'UTR/1st exon   | N_Shelf | 0.585±0.082 | 0.731±0.102 | -0.146 | 1.23E-03 | 4.49E-08 | -0.265 |
| cg27321942 | 19 | 49993217  | <i>RPL13A</i>    | 5'UTR            | S_Shelf | 0.595±0.07  | 0.741±0.123 | -0.146 | 9.28E-04 | 7.00E-11 | -0.314 |
| cg04340435 | 13 | 114145973 | <i>TMCO3</i>     | 5'UTR/1st intron | Island  | 0.344±0.111 | 0.49±0.204  | -0.145 | 2.84E-02 | 2.08E-17 | -0.402 |
| cg04340435 | 13 | 114145973 | <i>DCUN1D2</i>   | TSS1500          | Island  | 0.344±0.111 | 0.49±0.204  | -0.145 | 2.84E-02 | 4.78E-07 | -0.245 |
| cg09087503 | 7  | 127672473 | <i>LRRC4</i>     | TSS1500          | Island  | 0.499±0.043 | 0.644±0.049 | -0.145 | 1.29E-06 | 1.50E-11 | -0.324 |
| cg05629015 | 10 | 35929139  | <i>FZD8</i>      | 1st exon         | Island  | 0.564±0.11  | 0.709±0.091 | -0.145 | 7.29E-03 | 1.74E-05 | -0.210 |
| cg19820372 | 11 | 111411216 | <i>LAYN</i>      | 5'UTR/1st intron | Island  | 0.46±0.121  | 0.605±0.114 | -0.145 | 1.34E-02 | 5.43E-06 | -0.222 |
| cg07187855 | 6  | 30854161  | <i>DDR1</i>      | 5'UTR            | S_Shore | 0.356±0.126 | 0.501±0.182 | -0.145 | 3.02E-02 | 5.61E-11 | -0.316 |
| cg09273059 | 10 | 71077221  | <i>HK1</i>       | TSS1500          | N_Shore | 0.66±0.085  | 0.805±0.05  | -0.145 | 1.49E-03 | 7.24E-07 | -0.241 |
| cg24837256 | 1  | 19284087  | <i>IFFO2</i>     | TSS1500          | S_Shore | 0.599±0.08  | 0.744±0.107 | -0.145 | 1.26E-03 | 4.41E-07 | -0.246 |
| cg27545611 | 1  | 68517177  | <i>DIRAS3</i>    | 5'UTR/1st exon   | S_Shore | 0.609±0.132 | 0.753±0.183 | -0.145 | 3.52E-02 | 3.33E-08 | -0.268 |
| cg21625464 | 11 | 314044    | <i>IFITM1</i>    | 5'UTR/1st exon   | S_Shelf | 0.22±0.114  | 0.364±0.19  | -0.145 | 2.58E-02 | 5.95E-27 | -0.496 |
| cg03292284 | 1  | 241804036 | <i>OPN3</i>      | TSS1500          | S_Shore | 0.63±0.129  | 0.775±0.119 | -0.144 | 1.86E-02 | 7.77E-17 | -0.395 |
| cg18801945 | 19 | 13215041  | <i>LYL1</i>      | TSS1500          | N_Shore | 0.696±0.08  | 0.841±0.04  | -0.144 | 1.07E-03 | 1.28E-23 | -0.466 |
| cg04348222 | 1  | 32802307  | <i>MARCKSL1</i>  | TSS1500          | S_Shore | 0.498±0.104 | 0.642±0.14  | -0.144 | 9.37E-03 | 1.46E-08 | -0.275 |
| cg00929635 | 20 | 44035918  | <i>DBNDD2</i>    | 5'UTR/1st intron | Island  | 0.644±0.149 | 0.788±0.095 | -0.144 | 3.15E-02 | 1.29E-19 | -0.426 |
| cg19760410 | 1  | 154300117 | <i>ATP8B2</i>    | 5'UTR/1st intron | N_Shore | 0.371±0.098 | 0.515±0.146 | -0.144 | 8.02E-03 | 3.44E-05 | -0.203 |
| cg07483989 | 9  | 33751159  | <i>PRSS3</i>     | 5'UTR/1st intron | Island  | 0.353±0.097 | 0.497±0.191 | -0.144 | 1.82E-02 | 2.35E-09 | -0.289 |
| cg25291978 | 6  | 144386422 | <i>PLAGL1</i>    | TSS1500          | S_Shore | 0.741±0.072 | 0.885±0.054 | -0.144 | 4.02E-04 | 1.79E-05 | -0.210 |
| cg10914115 | 6  | 31704828  | <i>CLIC1</i>     | 5'UTR/1st exon   | N_Shelf | 0.395±0.082 | 0.539±0.129 | -0.144 | 2.62E-03 | 3.28E-29 | -0.514 |
| cg19714957 | 19 | 19843923  | <i>ZNF14</i>     | TSS200           | Island  | 0.336±0.145 | 0.48±0.147  | -0.144 | 3.64E-02 | 9.72E-28 | -0.502 |
| cg00018181 | 7  | 101931734 | <i>SH2B2</i>     | 5'UTR/1st intron | S_Shore | 0.341±0.148 | 0.485±0.135 | -0.143 | 3.70E-02 | 3.23E-05 | -0.203 |
| cg24641027 | 7  | 128050275 | <i>IMPDH1</i>    | TSS1500          | Island  | 0.082±0.055 | 0.225±0.179 | -0.143 | 5.32E-03 | 1.31E-06 | -0.236 |
| cg02018408 | 16 | 25269986  | <i>ZKSCAN2</i>   | TSS1500          | S_Shore | 0.242±0.1   | 0.385±0.148 | -0.143 | 9.46E-03 | 6.58E-08 | -0.262 |
| cg04953061 | 14 | 53620393  | <i>DDHD1</i>     | TSS1500          | S_Shore | 0.28±0.122  | 0.423±0.157 | -0.143 | 2.20E-02 | 9.64E-09 | -0.278 |
| cg23752923 | 1  | 85513892  | <i>MCOLN3</i>    | 5'UTR/1st intron | Island  | 0.144±0.121 | 0.287±0.191 | -0.143 | 3.19E-02 | 1.88E-05 | -0.209 |
| cg19410791 | 2  | 87037000  | <i>CD8A</i>      | TSS1500          | Island  | 0.629±0.116 | 0.772±0.137 | -0.143 | 1.47E-02 | 1.99E-07 | -0.253 |
| cg04361435 | 2  | 106362025 | <i>NCK2</i>      | 5'UTR/1st intron | Island  | 0.021±0.029 | 0.164±0.229 | -0.143 | 1.78E-02 | 5.18E-11 | -0.316 |
| cg15826897 | 19 | 15343373  | <i>EPHX3</i>     | 5'UTR/1st intron | N_Shore | 0.422±0.119 | 0.565±0.197 | -0.143 | 3.26E-02 | 5.98E-07 | -0.243 |
| cg09184467 | 10 | 14995699  | <i>DCLRE1C</i>   | 5'UTR/1st intron | Island  | 0.223±0.061 | 0.366±0.198 | -0.143 | 1.09E-02 | 4.38E-13 | -0.347 |
| cg17995652 | 8  | 80678925  | <i>HEY1</i>      | TSS1500          | S_Shore | 0.591±0.108 | 0.734±0.129 | -0.143 | 9.79E-03 | 2.57E-15 | -0.376 |
| cg02047547 | 16 | 19126242  | <i>ITPR1L2</i>   | 1st exon         | N_Shore | 0.593±0.099 | 0.736±0.043 | -0.143 | 4.21E-03 | 4.96E-08 | -0.265 |
| cg18650307 | 4  | 17809468  | <i>DCAF16</i>    | 5'UTR            | N_Shelf | 0.547±0.074 | 0.689±0.167 | -0.143 | 5.86E-03 | 7.72E-06 | -0.218 |
| cg20265043 | 7  | 23510089  | <i>IGF2BP3</i>   | TSS200           | S_Shore | 0.173±0.117 | 0.316±0.23  | -0.143 | 4.69E-02 | 3.75E-15 | -0.374 |
| cg07038400 | 3  | 135684163 | <i>PPP2R3A</i>   | TSS1500          | N_Shore | 0.632±0.142 | 0.774±0.09  | -0.142 | 2.63E-02 | 4.70E-10 | -0.301 |
| cg23371746 | 1  | 119532925 | <i>TBX15</i>     | TSS1500          | S_Shelf | 0.508±0.152 | 0.65±0.146  | -0.142 | 4.35E-02 | 1.23E-05 | -0.214 |
| cg09025215 | 1  | 223316219 | <i>TLR5</i>      | 5'UTR/1st intron | Island  | 0.506±0.129 | 0.649±0.214 | -0.142 | 4.86E-02 | 2.60E-06 | -0.229 |
| cg11614622 | 11 | 66623681  | <i>LRFN4</i>     | TSS1500          | Island  | 0.645±0.09  | 0.787±0.083 | -0.142 | 2.33E-03 | 5.07E-24 | -0.470 |
| cg07591622 | 14 | 24036914  | <i>AP1G2</i>     | 5'UTR/1st intron | Island  | 0.065±0.018 | 0.207±0.191 | -0.142 | 6.01E-03 | 1.41E-11 | -0.325 |
| cg03313364 | 17 | 40440904  | <i>STAT5A</i>    | 5'UTR            | Island  | 0.415±0.079 | 0.557±0.11  | -0.142 | 1.49E-03 | 1.23E-13 | -0.354 |
| cg03764274 | 17 | 79632335  | <i>CCDC137</i>   | TSS1500          | N_Shore | 0.595±0.071 | 0.737±0.101 | -0.142 | 6.26E-04 | 4.58E-10 | -0.301 |
| cg08641090 | 2  | 72375141  | <i>CYP26B1</i>   | TSS200           | N_Shore | 0.315±0.088 | 0.457±0.209 | -0.142 | 2.28E-02 | 1.03E-07 | -0.258 |
| cg17434309 | 11 | 2161079   | <i>IGF2</i>      | 5'UTR            | Island  | 0.543±0.13  | 0.684±0.124 | -0.142 | 2.20E-02 | 4.80E-12 | -0.332 |
| cg13806070 | 1  | 39957390  | <i>BMP8A</i>     | 5'UTR/1st exon   | Island  | 0.439±0.043 | 0.581±0.111 | -0.142 | 9.62E-05 | 2.65E-06 | -0.229 |
| cg18686270 | 3  | 146258875 | <i>PLSCR1</i>    | 5'UTR/1st intron | N_Shelf | 0.692±0.09  | 0.834±0.073 | -0.142 | 2.21E-03 | 1.21E-22 | -0.457 |
| cg07763231 | 17 | 80187349  | <i>SLC16A3</i>   | 5'UTR/1st intron | Island  | 0.438±0.126 | 0.58±0.218  | -0.142 | 4.92E-02 | 1.02E-09 | -0.295 |
| cg14374829 | 21 | 33244742  | <i>HUNK</i>      | TSS1500          | N_Shore | 0.188±0.094 | 0.329±0.184 | -0.141 | 1.63E-02 | 9.76E-07 | -0.238 |
| cg16015113 | 1  | 36024366  | <i>NCDN</i>      | 5'UTR/1st intron | S_Shore | 0.413±0.13  | 0.554±0.165 | -0.141 | 3.19E-02 | 1.74E-09 | -0.291 |
| cg06948408 | 1  | 43736600  | <i>TMEM125</i>   | 5'UTR            | N_Shore | 0.15±0.083  | 0.291±0.143 | -0.141 | 4.68E-03 | 1.55E-13 | -0.353 |
| cg14722509 | 5  | 170815938 | <i>NPM1</i>      | 5'UTR/1st intron | S_Shore | 0.07±0.013  | 0.21±0.222  | -0.141 | 1.58E-02 | 3.03E-10 | -0.304 |
| cg08400147 | 19 | 42807187  | <i>PAFAH1B3</i>  | TSS1500          | N_Shelf | 0.118±0.049 | 0.258±0.157 | -0.141 | 2.27E-03 | 3.49E-05 | -0.202 |
| cg02874908 | 11 | 67205113  | <i>PTPRCAP</i>   | 5'UTR/1st exon   | S_Shore | 0.766±0.08  | 0.906±0.03  | -0.140 | 1.34E-03 | 2.29E-46 | -0.627 |
| cg16242615 | 19 | 4059988   | <i>ZBTB7A</i>    | 5'UTR/1st intron | Island  | 0.414±0.124 | 0.555±0.183 | -0.140 | 3.41E-02 | 1.15E-05 | -0.214 |
| cg11862081 | 11 | 66625106  | <i>LRFN4</i>     | 5'UTR/1st exon   | Island  | 0.661±0.056 | 0.801±0.068 | -0.140 | 4.55E-05 | 3.35E-20 | -0.432 |
| cg04060561 | 6  | 127663200 | <i>ECHDC1</i>    | 5'UTR/1st intron | N_Shore | 0.671±0.091 | 0.811±0.102 | -0.140 | 3.35E-03 | 7.17E-07 | -0.241 |
| cg23679992 | 12 | 6421513   | <i>PLEKHG6</i>   | TSS1500          | S_Shore | 0.624±0.065 | 0.764±0.074 | -0.140 | 1.95E-04 | 1.64E-09 | -0.291 |
| cg21275690 | 16 | 3072970   | <i>THOC6</i>     | TSS1500          | N_Shore | 0.432±0.048 | 0.572±0.116 | -0.140 | 2.15E-04 | 2.00E-09 | -0.290 |
| cg18449964 | 18 | 72917101  | <i>ZADH2</i>     | 5'UTR/1st intron | N_Shelf | 0.502±0.107 | 0.642±0.166 | -0.140 | 1.82E-02 | 2.34E-07 | -0.251 |
| cg26477856 | 12 | 56324915  | <i>DGKA</i>      | TSS1500          | S_Shelf | 0.533±0.083 | 0.673±0.118 | -0.140 | 2.66E-03 | 4.04E-23 | -0.461 |
| cg10376827 | 10 | 88730324  | <i>AGAP11</i>    | TSS200           | S_Shore | 0.555±0.096 | 0.695±0.1   | -0.140 | 4.55E-03 | 4.29E-10 | -0.301 |
| cg03721978 | 6  | 33245706  | <i>B3GALT4</i>   | 1st exon         | S_Shore | 0.507±0.067 | 0.647±0.069 | -0.140 | 2.58E-04 | 1.15E-06 | -0.237 |
| cg00878163 | 17 | 56565644  | <i>HSF5</i>      | 5'UTR/1st exon   | Island  | 0.759±0.068 | 0.899±0.031 | -0.140 | 4.62E-04 | 1.40E-05 | -0.212 |
| cg22826239 | 7  | 23510123  | <i>IGF2BP3</i>   | TSS200           | S_Shore | 0.106±0.052 | 0.245±0.236 | -0.140 | 2.73E-02 | 1.48E-08 | -0.274 |
| cg02898094 | 7  | 96634914  | <i>DLX6</i>      | TSS1500          | Island  | 0.385±0.068 | 0.525±0.154 | -0.139 | 3.81E-03 | 9.82E-12 | -0.327 |
| cg21291672 | 1  | 29451713  | <i>TMEM200B</i>  | TSS1500          | Island  | 0.601±0.061 | 0.74±0.095  | -0.139 | 2.18E-04 | 1.68E-06 | -0.233 |
| cg06707978 | 19 | 58095155  | <i>ZIK1</i>      | TSS200           | Island  | 0.432±0.123 | 0.571±0.126 | -0.139 | 1.95E-02 | 8.44E-16 | -0.382 |
| cg08696931 | 12 | 123754071 | <i>CDK2AP1</i>   | 5'UTR/1st intron | N_Shore | 0.574±0.08  | 0.713±0.053 | -0.139 | 1.14E-03 | 1.20E-12 | -0.341 |
| cg16184495 | 19 | 15343350  | <i>EPHX3</i>     | 5'UTR/1st intron | N_Shore | 0.456±0.115 | 0.595±0.203 | -0.139 | 3.74E-02 | 4.85E-08 | -0.265 |
| cg18337363 | 3  | 52569053  | <i>NTSDC2</i>    | 5'UTR/1st exon   | S_Shore | 0.748±0.119 | 0.888±0.048 | -0.139 | 1.27E-02 | 1.39E-45 | -0.623 |
| cg00564061 | 6  | 117001170 | <i>KPNA5</i>     | TSS1500          | N_Shore | 0.701±0.144 | 0.84±0.066  | -0.139 | 2.95E-02 | 1.08E-07 | -0.258 |
| cg03034696 | 2  | 47400023  | <i>CALM2</i>     | 5'UTR/1st exon   | N_Shelf | 0.298±0.114 | 0.436±0.179 | -0.139 | 2.72E-02 | 5.65E-07 | -0.243 |
| cg05568549 | 6  | 41907198  | <i>CEND3</i>     | 5'UTR            | N_Shore | 0.669±0.066 | 0.807±0.032 | -0.139 | 3.85E-04 | 1.00E-18 | -0.417 |
| cg02718531 | 16 | 2932507   | <i>FLYWCH2</i>   | TSS1500          | Island  | 0.119±0.091 | 0.258±0.185 | -0.139 | 1.75E-02 | 2.01E-08 | -0.272 |
| cg20158248 | 16 | 16042956  | <i>ABCC1</i>     | TSS1500          | N_Shore | 0.24±0.122  | 0.378±0.16  | -0.139 | 2.71E-02 | 1.07E-10 | -0.311 |
| cg21088488 | 7  | 44105721  | <i>PGAM2</i>     | TSS1500          | S_Shore | 0.355±0.061 | 0.494±0.159 | -0.138 | 3.85E-03 | 1.15E-05 | -0.214 |
| cg12743727 | 10 | 44101728  | <i>ZNF485</i>    | TSS200           | N_Shore | 0.407±0.093 | 0.545±0.14  | -0.138 | 7.66E-03 | 5.49E-06 | -0.222 |
| cg05503460 | 15 | 51387651  | <i>TNFAIP8L3</i> | TSS1500          | S_Shore | 0.186±0.097 | 0.325±0.194 | -0.138 | 2.35E-02 | 1.72E-06 | -0.233 |
| cg04831783 | 16 | 88769549  | <i>RNF166</i>    | 5'UTR/1st exon   | N_Shelf | 0.494±0.09  | 0.632±0.103 | -0.138 | 3.35E-03 | 2.03E-08 | -0.272 |
| cg06209689 | 1  | 47696348  | <i>TAL1</i>      | 5'UTR            | N_Shore | 0.302±0.082 | 0.44±0.137  | -0.138 | 4.41E-03 | 3.42E-05 | -0.203 |
| cg17301902 | 9  | 80263219  | <i>GNA14</i>     | 5'UTR/1st exon   | Island  | 0.304±0.058 | 0.442±0.179 | -0.138 | 7.26E-03 | 6.53E-25 | -0.478 |
| cg08114617 | 12 | 110271441 | <i>TRPV4</i>     | TSS1500          | Island  | 0.409±0.059 | 0.547±0.139 | -0.138 | 1.62E-03 | 1.74E-15 | -0.379 |
| cg02690491 | 19 | 12075772  | <i>ZNF763</i>    | TSS200           | N_Shore | 0.236±0.065 | 0.374±0.139 | -0.138 | 2.09E-03 | 4.78E-11 | -0.317 |
| cg25363789 | 11 | 649       |                  |                  |         |             |             |        |          |          |        |

|            |    |           |                 |                  |         |             |             |        |          |          |        |
|------------|----|-----------|-----------------|------------------|---------|-------------|-------------|--------|----------|----------|--------|
| cg25823419 | 3  | 179169252 | <i>GNB4</i>     | 5'UTR/1st exon   | Island  | 0.437±0.117 | 0.575±0.206 | -0.138 | 4.18E-02 | 1.84E-08 | -0.273 |
| cg20034202 | 2  | 232260136 | <i>B3GNT7</i>   | TSS200           | Island  | 0.547±0.093 | 0.685±0.129 | -0.138 | 6.42E-03 | 2.79E-06 | -0.228 |
| cg05239956 | 14 | 24036509  | <i>AP1G2</i>    | 5'UTR            | Island  | 0.073±0.033 | 0.21±0.213  | -0.137 | 1.54E-02 | 2.97E-15 | -0.376 |
| cg03743037 | 7  | 134673090 | <i>AGBL3</i>    | 5'UTR            | S_Shore | 0.62±0.12   | 0.758±0.176 | -0.137 | 3.19E-02 | 2.28E-06 | -0.230 |
| cg19626656 | 1  | 1053027   | <i>C1orf159</i> | TSS1500          | S_Shore | 0.752±0.116 | 0.889±0.035 | -0.137 | 1.19E-02 | 1.21E-06 | -0.236 |
| cg02504521 | 12 | 46660819  | <i>SLC38A1</i>  | 5'UTR/1st intron | N_Shore | 0.292±0.098 | 0.429±0.191 | -0.137 | 2.43E-02 | 1.10E-14 | -0.368 |
| cg12154624 | 6  | 29760754  | <i>HCG4</i>     | 1st exon         | Island  | 0.078±0.009 | 0.216±0.166 | -0.137 | 2.80E-03 | 1.65E-07 | -0.254 |
| cg16857428 | 19 | 9435206   | <i>ZNF559</i>   | 5'UTR/1st intron | S_Shore | 0.219±0.074 | 0.356±0.232 | -0.137 | 3.33E-02 | 2.52E-19 | -0.423 |
| cg07106615 | 15 | 43785974  | <i>TP53BP1</i>  | 5'UTR/1st intron | S_Shore | 0.708±0.099 | 0.845±0.043 | -0.137 | 5.46E-03 | 1.26E-07 | -0.257 |
| cg08224785 | 5  | 156696189 | <i>CYFIP2</i>   | 5'UTR/1st intron | S_Shelf | 0.708±0.093 | 0.845±0.042 | -0.137 | 3.67E-03 | 1.21E-08 | -0.276 |
| cg01798499 | 12 | 123450932 | <i>ABC89</i>    | 5'UTR/1st exon   | Island  | 0.052±0.12  | 0.189±0.205 | -0.137 | 4.50E-02 | 3.43E-05 | -0.203 |
| cg02839123 | 22 | 40390264  | <i>FAM83F</i>   | TSS1500          | N_Shore | 0.37±0.065  | 0.507±0.142 | -0.137 | 2.66E-03 | 6.38E-09 | -0.281 |
| cg04289385 | 6  | 36355825  | <i>ETV7</i>     | TSS1500          | Island  | 0.324±0.129 | 0.46±0.178  | -0.136 | 4.08E-02 | 1.00E-10 | -0.312 |
| cg07741984 | 3  | 111805005 | <i>C3orf52</i>  | TSS200           | Island  | 0.264±0.112 | 0.4±0.17    | -0.136 | 2.50E-02 | 7.52E-06 | -0.219 |
| cg14527110 | 5  | 131561292 | <i>P4HA2</i>    | 5'UTR            | N_Shore | 0.463±0.1   | 0.599±0.122 | -0.136 | 8.65E-03 | 4.26E-21 | -0.442 |
| cg24161793 | 2  | 96990762  | <i>ITPR1PL1</i> | TSS1500          | N_Shore | 0.323±0.109 | 0.459±0.203 | -0.136 | 3.68E-02 | 1.95E-21 | -0.445 |
| cg04962480 | 8  | 101962118 | <i>YWHAZ</i>    | 5'UTR/1st intron | N_Shore | 0.193±0.076 | 0.329±0.181 | -0.136 | 1.26E-02 | 1.13E-18 | -0.416 |
| cg12857875 | 2  | 239047191 | <i>KLHL30</i>   | TSS200           | N_Shelf | 0.559±0.069 | 0.695±0.078 | -0.136 | 4.41E-04 | 4.66E-13 | -0.346 |
| cg14315198 | 17 | 26879866  | <i>UNC119</i>   | TSS1500          | S_Shore | 0.37±0.1    | 0.506±0.2   | -0.136 | 3.02E-02 | 2.37E-20 | -0.434 |
| cg20794824 | 3  | 170138205 | <i>CLDN11</i>   | TSS1500          | S_Shore | 0.603±0.083 | 0.738±0.058 | -0.136 | 1.75E-03 | 2.24E-12 | -0.337 |
| cg02218324 | 19 | 46318439  | <i>RSPH6A</i>   | 5'UTR/1st exon   | N_Shore | 0.684±0.075 | 0.82±0.032  | -0.136 | 1.10E-03 | 2.65E-05 | -0.205 |
| cg02652260 | 21 | 18985383  | <i>BTG3</i>     | TSS200           | Island  | 0.019±0.019 | 0.155±0.203 | -0.135 | 1.17E-02 | 3.15E-05 | -0.204 |
| cg07949597 | 16 | 3355079   | <i>ZNF75A</i>   | TSS1500          | Island  | 0.303±0.072 | 0.438±0.201 | -0.135 | 1.92E-02 | 1.67E-07 | -0.254 |
| cg16800851 | 6  | 130339565 | <i>L3MBTL3</i>  | 5'UTR/1st exon   | N_Shore | 0.164±0.107 | 0.299±0.204 | -0.135 | 3.76E-02 | 1.91E-09 | -0.290 |
| cg10477603 | 10 | 126849704 | <i>CTBP2</i>    | TSS1500          | Island  | 0.133±0.043 | 0.268±0.171 | -0.135 | 4.95E-03 | 2.58E-06 | -0.229 |
| cg08687005 | 19 | 56988929  | <i>ZNF667</i>   | TSS200           | Island  | 0.232±0.105 | 0.367±0.181 | -0.135 | 2.57E-02 | 2.58E-15 | -0.376 |
| cg18359530 | 5  | 77945219  | <i>LHFPL2</i>   | TSS1500          | Island  | 0.194±0.071 | 0.329±0.203 | -0.135 | 1.99E-02 | 1.22E-05 | -0.214 |
| cg13791254 | 9  | 100616607 | <i>FOXE1</i>    | 1st exon         | S_Shore | 0.587±0.144 | 0.722±0.149 | -0.135 | 4.64E-02 | 7.36E-07 | -0.241 |
| cg14135060 | 5  | 150456285 | <i>TNIP1</i>    | 5'UTR/1st intron | N_Shelf | 0.621±0.072 | 0.756±0.136 | -0.135 | 3.22E-03 | 6.82E-16 | -0.384 |
| cg24367568 | 19 | 49837281  | <i>CD37</i>     | TSS1500          | N_Shelf | 0.385±0.058 | 0.52±0.126  | -0.135 | 1.06E-03 | 7.13E-08 | -0.262 |
| cg12836958 | 4  | 186132412 | <i>SNX25</i>    | 5'UTR/1st intron | S_Shore | 0.712±0.111 | 0.847±0.048 | -0.135 | 1.04E-02 | 1.71E-11 | -0.324 |
| cg12800266 | 6  | 37225002  | <i>TBC1D22B</i> | TSS1500          | N_Shore | 0.419±0.143 | 0.554±0.151 | -0.135 | 4.64E-02 | 1.64E-07 | -0.254 |
| cg03960072 | 6  | 24357985  | <i>DCDC2</i>    | 5'UTR            | N_Shelf | 0.442±0.103 | 0.577±0.154 | -0.135 | 1.66E-02 | 4.32E-11 | -0.317 |
| cg03960072 | 6  | 24357985  | <i>KAAG1</i>    | 1st exon         | N_Shelf | 0.442±0.103 | 0.577±0.154 | -0.135 | 1.66E-02 | 3.91E-07 | -0.247 |
| cg10059450 | 11 | 66405549  | <i>RBM4</i>     | TSS1500          | N_Shore | 0.27±0.11   | 0.405±0.214 | -0.135 | 4.55E-02 | 4.57E-09 | -0.284 |
| cg24503712 | 1  | 151762261 | <i>TDKHK</i>    | 5'UTR/1st intron | N_Shore | 0.685±0.085 | 0.819±0.099 | -0.135 | 2.82E-03 | 1.58E-09 | -0.292 |
| cg23462514 | 4  | 1107585   | <i>RNF212</i>   | TSS1500          | Island  | 0.668±0.099 | 0.802±0.061 | -0.135 | 5.87E-03 | 3.86E-07 | -0.247 |
| cg01347228 | 17 | 29297391  | <i>RNF135</i>   | TSS1500          | N_Shore | 0.67±0.092  | 0.804±0.125 | -0.134 | 6.75E-03 | 2.04E-17 | -0.402 |
| cg06823034 | 14 | 24780734  | <i>LTB4R</i>    | 5'UTR/1st exon   | Island  | 0.38±0.11   | 0.514±0.206 | -0.134 | 4.14E-02 | 6.68E-10 | -0.298 |
| cg08839210 | 17 | 27045048  | <i>RAB34</i>    | 5'UTR/1st intron | N_Shore | 0.393±0.078 | 0.528±0.206 | -0.134 | 2.43E-02 | 1.75E-22 | -0.455 |
| cg01548965 | 11 | 73088618  | <i>REL1</i>     | 5'UTR/1st intron | S_Shore | 0.68±0.062  | 0.814±0.032 | -0.134 | 3.06E-04 | 2.84E-52 | -0.657 |
| cg03087507 | 19 | 12076234  | <i>ZNF763</i>   | 5'UTR/1st intron | Island  | 0.319±0.065 | 0.454±0.197 | -0.134 | 1.66E-02 | 5.57E-30 | -0.520 |
| cg06909469 | 2  | 96990800  | <i>ITPR1PL1</i> | TSS1500          | N_Shore | 0.26±0.075  | 0.394±0.171 | -0.134 | 1.07E-02 | 8.22E-15 | -0.370 |
| cg19165274 | 10 | 4868328   | <i>AKR1E2</i>   | TSS200           | Island  | 0.485±0.071 | 0.619±0.119 | -0.134 | 1.80E-03 | 2.18E-18 | -0.413 |
| cg08357436 | 17 | 56565641  | <i>HSF5</i>     | 5'UTR/1st exon   | Island  | 0.765±0.059 | 0.899±0.031 | -0.134 | 2.06E-04 | 5.13E-07 | -0.244 |
| cg26971042 | 15 | 70387217  | <i>TLE3</i>     | TSS200           | N_Shore | 0.351±0.09  | 0.485±0.196 | -0.134 | 2.52E-02 | 5.85E-09 | -0.282 |
| cg26683259 | 5  | 77943417  | <i>LHFPL2</i>   | 5'UTR/1st intron | N_Shore | 0.149±0.084 | 0.283±0.201 | -0.134 | 2.45E-02 | 4.46E-07 | -0.246 |
| cg27379065 | 19 | 20011538  | <i>ZNF93</i>    | TSS200           | N_Shore | 0.121±0.031 | 0.255±0.145 | -0.134 | 1.34E-03 | 3.65E-06 | -0.226 |
| cg24251890 | 11 | 47290825  | <i>MADD</i>     | TSS1500          | N_Shore | 0.141±0.123 | 0.275±0.187 | -0.134 | 4.31E-02 | 7.67E-08 | -0.261 |
| cg03736062 | 4  | 113208476 | <i>TIFA</i>     | TSS1500          | S_Shore | 0.763±0.083 | 0.896±0.02  | -0.133 | 2.56E-03 | 1.29E-08 | -0.276 |
| cg15354065 | 12 | 56327217  | <i>DGKA</i>     | 5'UTR/1st intron | S_Shore | 0.548±0.082 | 0.681±0.098 | -0.133 | 2.39E-03 | 1.94E-08 | -0.272 |
| cg25324068 | 17 | 7462249   | <i>TNFSF13</i>  | 1st exon         | N_Shelf | 0.537±0.067 | 0.67±0.061  | -0.133 | 3.89E-04 | 3.57E-26 | -0.489 |
| cg12640469 | 1  | 53067717  | <i>GPX7</i>     | TSS1500          | N_Shore | 0.381±0.067 | 0.514±0.187 | -0.133 | 1.39E-02 | 3.35E-26 | -0.489 |
| cg00316759 | 15 | 71407484  | <i>CT62</i>     | 5'UTR/1st exon   | N_Shore | 0.485±0.094 | 0.618±0.212 | -0.133 | 3.71E-02 | 1.59E-07 | -0.255 |
| cg10782923 | 12 | 56329731  | <i>DGKA</i>     | 1st exon         | S_Shelf | 0.649±0.084 | 0.781±0.07  | -0.132 | 2.21E-03 | 5.77E-09 | -0.282 |
| cg02039839 | 7  | 1015730   | <i>COX19</i>    | TSS1500          | S_Shore | 0.47±0.063  | 0.603±0.141 | -0.132 | 2.91E-03 | 2.32E-06 | -0.230 |
| cg07783282 | 12 | 95942964  | <i>USP44</i>    | 5'UTR/1st intron | Island  | 0.508±0.133 | 0.64±0.154  | -0.132 | 4.10E-02 | 6.44E-09 | -0.281 |
| cg10177528 | 1  | 211499638 | <i>TRAF5</i>    | TSS1500          | N_Shore | 0.65±0.098  | 0.782±0.072 | -0.132 | 6.02E-03 | 3.44E-11 | -0.319 |
| cg25331703 | 15 | 101459283 | <i>LRRK1</i>    | TSS200           | Island  | 0.425±0.085 | 0.557±0.145 | -0.132 | 8.19E-03 | 3.29E-06 | -0.227 |
| cg04500986 | 1  | 6526531   | <i>TNFRSF25</i> | TSS1500          | S_Shore | 0.62±0.099  | 0.752±0.085 | -0.132 | 6.64E-03 | 5.92E-30 | -0.520 |
| cg11683242 | 1  | 32716557  | <i>LCK</i>      | TSS1500          | S_Shelf | 0.745±0.092 | 0.877±0.03  | -0.132 | 4.42E-03 | 5.85E-73 | -0.741 |
| cg22096687 | 11 | 87908817  | <i>RAB38</i>    | TSS200           | S_Shore | 0.461±0.093 | 0.593±0.146 | -0.132 | 1.16E-02 | 8.76E-22 | -0.449 |
| cg10579718 | 1  | 1052886   | <i>C1orf159</i> | TSS1500          | S_Shore | 0.687±0.077 | 0.819±0.08  | -0.132 | 1.32E-03 | 1.86E-10 | -0.307 |
| cg00808648 | 14 | 105779910 | <i>PACS2</i>    | 5'UTR/1st intron | N_Shore | 0.633±0.113 | 0.765±0.084 | -0.132 | 1.33E-02 | 5.02E-06 | -0.223 |
| cg11953272 | 1  | 53067965  | <i>GPX7</i>     | TSS200           | Island  | 0.218±0.091 | 0.35±0.148  | -0.132 | 1.15E-02 | 6.92E-32 | -0.535 |
| cg00730820 | 1  | 27694390  | <i>MAP3K6</i>   | TSS1500          | S_Shore | 0.546±0.048 | 0.677±0.175 | -0.132 | 7.44E-03 | 1.92E-06 | -0.232 |
| cg26122129 | 8  | 30241119  | <i>BPMP5</i>    | TSS1500          | N_Shore | 0.606±0.141 | 0.738±0.116 | -0.132 | 3.97E-02 | 3.72E-08 | -0.267 |
| cg22555539 | 7  | 43798090  | <i>BLVRA</i>    | TSS200           | Island  | 0.057±0.072 | 0.189±0.223 | -0.132 | 3.45E-02 | 2.67E-08 | -0.270 |
| cg22174486 | 11 | 536817    | <i>LRRC56</i>   | TSS1500          | Island  | 0.378±0.113 | 0.509±0.143 | -0.132 | 2.24E-02 | 7.54E-07 | -0.241 |
| cg24664689 | 8  | 11058690  | <i>XKR6</i>     | 1st exon         | S_Shore | 0.43±0.13   | 0.562±0.16  | -0.131 | 4.11E-02 | 1.13E-09 | -0.294 |
| cg20886263 | 3  | 53196104  | <i>PRKCD</i>    | 5'UTR/1st intron | Island  | 0.113±0.036 | 0.245±0.195 | -0.131 | 1.23E-02 | 9.21E-24 | -0.468 |
| cg04800681 | 22 | 18594235  | <i>TUBA8</i>    | 5'UTR/1st intron | S_Shore | 0.477±0.092 | 0.608±0.153 | -0.131 | 1.33E-02 | 8.42E-11 | -0.313 |
| cg20389653 | 1  | 16766715  | <i>NECAP2</i>   | TSS1500          | N_Shore | 0.728±0.106 | 0.859±0.065 | -0.131 | 9.39E-03 | 2.41E-05 | -0.206 |
| cg00496004 | 11 | 130029481 | <i>ST14</i>     | TSS200           | N_Shore | 0.361±0.132 | 0.492±0.128 | -0.131 | 3.48E-02 | 1.42E-18 | -0.415 |
| cg24395117 | 11 | 70245893  | <i>CTTN</i>     | 5'UTR/1st intron | S_Shore | 0.596±0.114 | 0.727±0.041 | -0.131 | 1.35E-02 | 6.55E-07 | -0.242 |
| cg08896939 | 17 | 29297380  | <i>RNF135</i>   | TSS1500          | N_Shore | 0.696±0.07  | 0.827±0.096 | -0.131 | 1.00E-03 | 5.77E-19 | -0.419 |
| cg22903300 | 6  | 29760765  | <i>HCG4</i>     | 1st exon         | Island  | 0.046±0.011 | 0.177±0.197 | -0.131 | 1.20E-02 | 4.95E-06 | -0.223 |
| cg04118190 | 2  | 96812528  | <i>DUSP2</i>    | TSS1500          | S_Shore | 0.57±0.099  | 0.701±0.115 | -0.131 | 9.50E-03 | 3.78E-11 | -0.318 |
| cg05675373 | 1  | 110754257 | <i>KCNC4</i>    | 1st exon         | Island  | 0.483±0.077 | 0.614±0.133 | -0.131 | 4.67E-03 | 2.45E-05 | -0.206 |
| cg17108629 | 11 | 87908805  | <i>RAB38</i>    | TSS200           | S_Shore | 0.429±0.098 | 0.56±0.17   | -0.131 | 2.19E-02 | 1.92E-13 | -0.352 |
| cg15641364 | 1  | 159892206 | <i>TAGLN2</i>   | 5'UTR/1st intron | N_Shelf | 0.462±0.104 | 0.593±0.184 | -0.131 | 3.13E-02 | 1.40E-10 | -0.309 |
| cg05798318 | 11 | 536758    | <i>LRRC56</i>   | TSS1500          | Island  | 0.453±0.14  | 0.584±0.146 | -0.130 | 4.82E-02 | 2.84E-07 | -0.250 |
| cg00523161 | 2  | 11888753  | <i>LPIN1</i>    | 5'UTR/1st exon   | S_Shore | 0.488±0.122 | 0.618±0.123 | -0.130 | 2.56E-02 | 7.40E-20 | -0.429 |
| cg11436767 | 11 | 46401422  | <i>MDK</i>      | TSS1500          | N_Shore | 0.526±0.092 | 0.656±0.093 | -0.130 | 5.16E-03 | 2.43E-16 | -0.389 |
| cg04241075 | 1  | 46807263  | <i>NSUN4</i>    | 5'UTR/1st exon   | S_Shore | 0.518       |             |        |          |          |        |

|            |    |           |           |                  |         |             |             |        |          |          |        |
|------------|----|-----------|-----------|------------------|---------|-------------|-------------|--------|----------|----------|--------|
| cg14630839 | 22 | 50919823  | ADM2      | TSS1500          | Island  | 0.042±0.042 | 0.172±0.195 | -0.130 | 1.43E-02 | 2.37E-05 | -0.207 |
| cg03312716 | 12 | 110271581 | TRPV4     | TSS1500          | Island  | 0.473±0.118 | 0.603±0.125 | -0.130 | 2.36E-02 | 3.52E-06 | -0.226 |
| cg24845234 | 7  | 23509610  | IGF2BP3   | 1st exon         | Island  | 0.334±0.08  | 0.463±0.16  | -0.129 | 1.14E-02 | 7.75E-12 | -0.329 |
| cg08014499 | 11 | 2162545   | IGF2      | 5'UTR            | S_Shore | 0.582±0.124 | 0.711±0.158 | -0.129 | 3.83E-02 | 6.08E-12 | -0.330 |
| cg26570683 | 19 | 11689860  | ACPS      | TSS1500          | S_Shore | 0.351±0.068 | 0.48±0.156  | -0.129 | 7.15E-03 | 1.23E-20 | -0.437 |
| cg02233614 | 1  | 207227965 | PKFB2     | 5'UTR/1st intron | S_Shelf | 0.659±0.087 | 0.789±0.071 | -0.129 | 3.50E-03 | 4.26E-08 | -0.266 |
| cg17177816 | 10 | 96304193  | HELLS     | TSS1500          | N_Shore | 0.738±0.137 | 0.867±0.095 | -0.129 | 3.60E-02 | 6.70E-10 | -0.298 |
| cg02680487 | 6  | 30851529  | DDR1      | 5'UTR/1st intron | N_Shore | 0.49±0.137  | 0.619±0.138 | -0.129 | 4.49E-02 | 1.52E-19 | -0.425 |
| cg02317321 | 10 | 15131036  | ACBD7     | TSS1500          | S_Shore | 0.195±0.114 | 0.324±0.181 | -0.129 | 3.93E-02 | 1.73E-06 | -0.233 |
| cg06942110 | 7  | 1545385   | INTS1     | TSS1500          | S_Shore | 0.498±0.072 | 0.627±0.122 | -0.129 | 2.92E-03 | 2.97E-07 | -0.249 |
| cg04619185 | 22 | 45706476  | FAM118A   | 5'UTR            | Island  | 0.106±0.079 | 0.235±0.166 | -0.129 | 1.32E-02 | 9.20E-06 | -0.217 |
| cg09119665 | 14 | 74181285  | PNMA1     | TSS200           | S_Shore | 0.13±0.091  | 0.259±0.182 | -0.129 | 2.47E-02 | 7.14E-16 | -0.383 |
| cg24006126 | 1  | 155290813 | RUSC1     | 5'UTR/1st intron | N_Shore | 0.454±0.121 | 0.583±0.121 | -0.129 | 2.61E-02 | 2.00E-05 | -0.208 |
| cg19680850 | 1  | 37943106  | ZC3H12A   | 5'UTR            | S_Shelf | 0.111±0.056 | 0.24±0.12   | -0.129 | 1.04E-03 | 2.88E-06 | -0.228 |
| cg04481779 | 6  | 137366125 | IL20RA    | 5'UTR/1st exon   | Island  | 0.575±0.128 | 0.704±0.163 | -0.129 | 4.45E-02 | 5.28E-15 | -0.372 |
| cg18661868 | 15 | 91427965  | FES       | 5'UTR/1st intron | S_Shelf | 0.275±0.092 | 0.404±0.169 | -0.129 | 2.01E-02 | 9.53E-40 | -0.588 |
| cg05564831 | 3  | 52568323  | NTSDC2    | TSS1500          | Island  | 0.477±0.085 | 0.606±0.162 | -0.129 | 1.45E-02 | 2.98E-16 | -0.388 |
| cg06460568 | 11 | 2162211   | IGF2      | 5'UTR            | Island  | 0.576±0.024 | 0.704±0.097 | -0.129 | 3.12E-05 | 7.53E-07 | -0.241 |
| cg20459126 | 3  | 142443247 | TRPC1     | TSS200           | Island  | 0.081±0.095 | 0.21±0.219  | -0.128 | 4.78E-02 | 1.86E-07 | -0.253 |
| cg14269096 | 18 | 56532433  | ZNF532    | 5'UTR/1st intron | S_Shore | 0.597±0.119 | 0.725±0.088 | -0.128 | 2.01E-02 | 4.11E-10 | -0.302 |
| cg25535587 | 10 | 82116456  | DYDC1     | 5'UTR/1st intron | Island  | 0.643±0.088 | 0.771±0.186 | -0.128 | 2.54E-02 | 1.97E-14 | -0.365 |
| cg25537993 | 19 | 58545182  | ZSCAN1    | TSS1500          | Island  | 0.635±0.098 | 0.763±0.098 | -0.128 | 8.43E-03 | 3.64E-07 | -0.247 |
| cg03127244 | 6  | 33245638  | B3GALT4   | 1st exon         | S_Shore | 0.684±0.087 | 0.812±0.034 | -0.128 | 3.81E-03 | 4.65E-06 | -0.223 |
| cg19688887 | 19 | 20150441  | ZNF682    | TSS1500          | S_Shore | 0.037±0.009 | 0.165±0.193 | -0.128 | 1.21E-02 | 3.04E-07 | -0.249 |
| cg13660174 | 9  | 136238392 | SURF4     | 5'UTR            | N_Shelf | 0.596±0.097 | 0.724±0.081 | -0.128 | 7.22E-03 | 2.53E-07 | -0.251 |
| cg18397882 | 19 | 19050971  | HOMER3    | 5'UTR/1st exon   | N_Shore | 0.18±0.093  | 0.308±0.168 | -0.128 | 2.10E-02 | 2.57E-08 | -0.270 |
| cg01131735 | 17 | 39968419  | FKBP10    | TSS1500          | Island  | 0.086±0.088 | 0.213±0.216 | -0.128 | 4.28E-02 | 4.08E-06 | -0.225 |
| cg07634645 | 12 | 14720938  | PLBD1     | TSS200           | Island  | 0.471±0.131 | 0.599±0.162 | -0.128 | 4.87E-02 | 6.79E-20 | -0.429 |
| cg13951491 | 1  | 45793032  | HPDL      | 1st exon         | Island  | 0.476±0.056 | 0.604±0.064 | -0.128 | 1.24E-04 | 1.28E-07 | -0.257 |
| cg06991495 | 22 | 38714466  | CSNK1E    | TSS1500          | S_Shore | 0.499±0.088 | 0.627±0.088 | -0.127 | 4.42E-03 | 1.24E-17 | -0.404 |
| cg00246451 | 1  | 155949012 | ARHGEF2   | 5'UTR/1st exon   | S_Shore | 0.418±0.126 | 0.545±0.167 | -0.127 | 4.60E-02 | 1.26E-14 | -0.368 |
| cg04413069 | 12 | 9800446   | LOC374443 | TSS200           | N_Shore | 0.11±0.086  | 0.237±0.18  | -0.127 | 2.27E-02 | 6.44E-07 | -0.242 |
| cg04193820 | 17 | 29297414  | RNF135    | TSS1500          | N_Shore | 0.681±0.066 | 0.808±0.149 | -0.127 | 5.85E-03 | 2.72E-15 | -0.376 |
| cg15026998 | 2  | 160761622 | LY75      | TSS1500          | S_Shore | 0.362±0.109 | 0.489±0.181 | -0.127 | 3.84E-02 | 2.21E-14 | -0.364 |
| cg26299148 | 15 | 41522672  | EXD1      | 5'UTR/1st intron | N_Shore | 0.696±0.074 | 0.823±0.098 | -0.127 | 1.92E-03 | 1.44E-06 | -0.235 |
| cg12090942 | 14 | 77279508  | ANGEL1    | TSS1500          | S_Shore | 0.587±0.066 | 0.714±0.086 | -0.127 | 7.25E-04 | 1.27E-05 | -0.213 |
| cg06733329 | 5  | 176740039 | MXD3      | TSS1500          | S_Shore | 0.186±0.1   | 0.312±0.129 | -0.127 | 1.47E-02 | 1.41E-11 | -0.325 |
| cg03131767 | 12 | 123446272 | ABC89     | 5'UTR/1st intron | S_Shore | 0.638±0.087 | 0.765±0.123 | -0.127 | 7.42E-03 | 1.59E-08 | -0.274 |
| cg06159340 | 16 | 30907560  | CTF1      | TSS1500          | S_Shore | 0.688±0.085 | 0.814±0.041 | -0.127 | 3.39E-03 | 2.70E-31 | -0.531 |
| cg26811705 | 11 | 118781408 | BCL9L     | 5'UTR/1st exon   | Island  | 0.465±0.105 | 0.591±0.204 | -0.126 | 4.94E-02 | 2.65E-08 | -0.270 |
| cg10193721 | 14 | 24780691  | LTBR4     | TSS200           | Island  | 0.37±0.092  | 0.496±0.181 | -0.126 | 2.76E-02 | 1.67E-09 | -0.291 |
| cg04728789 | 22 | 38711154  | CSNK1E    | 5'UTR/1st intron | N_Shore | 0.516±0.061 | 0.642±0.102 | -0.126 | 8.21E-04 | 1.39E-09 | -0.293 |
| cg22536775 | 1  | 1851439   | TMEM52    | TSS1500          | S_Shore | 0.479±0.088 | 0.604±0.132 | -0.125 | 1.02E-02 | 4.13E-09 | -0.284 |
| cg08032476 | 17 | 27045176  | RAB34     | 1st exon         | N_Shore | 0.562±0.057 | 0.687±0.147 | -0.125 | 4.56E-03 | 6.79E-26 | -0.487 |
| cg06303238 | 20 | 50418959  | SALL4     | 5'UTR/1st exon   | Island  | 0.734±0.12  | 0.859±0.056 | -0.125 | 2.14E-02 | 4.79E-20 | -0.431 |
| cg04138502 | 3  | 123167522 | ADCY5     | TSS200           | Island  | 0.46±0.099  | 0.585±0.079 | -0.125 | 9.03E-03 | 8.67E-11 | -0.313 |
| cg10101634 | 3  | 32432642  | CMTM7     | TSS1500          | N_Shore | 0.59±0.073  | 0.715±0.084 | -0.125 | 1.56E-03 | 7.91E-08 | -0.261 |
| cg19301742 | 6  | 33421180  | ZBTB9     | TSS1500          | N_Shore | 0.196±0.054 | 0.321±0.141 | -0.125 | 3.42E-03 | 2.13E-05 | -0.208 |
| cg08220696 | 17 | 61820713  | STRADA    | TSS1500          | S_Shore | 0.76±0.146  | 0.885±0.075 | -0.125 | 4.94E-02 | 9.19E-06 | -0.217 |
| cg04303330 | 5  | 131992430 | IL13      | 5'UTR/1st intron | S_Shore | 0.646±0.064 | 0.771±0.059 | -0.125 | 4.68E-04 | 2.73E-09 | -0.288 |
| cg24427376 | 1  | 78354053  | NEXN      | TSS200           | N_Shore | 0.472±0.089 | 0.597±0.137 | -0.124 | 1.20E-02 | 1.24E-15 | -0.380 |
| cg11724055 | 1  | 23667475  | HNRNP9    | 5'UTR/1st intron | N_Shelf | 0.495±0.101 | 0.62±0.166  | -0.124 | 2.85E-02 | 6.12E-06 | -0.221 |
| cg23238834 | 6  | 31126879  | TCF19     | 5'UTR            | S_Shore | 0.129±0.058 | 0.253±0.169 | -0.124 | 1.08E-02 | 5.55E-16 | -0.385 |
| cg23238834 | 6  | 31126879  | CHCHR1    | TSS1500          | S_Shore | 0.129±0.058 | 0.253±0.169 | -0.124 | 1.08E-02 | 4.46E-06 | -0.224 |
| cg14389924 | 17 | 4606729   | PELP1     | 5'UTR/1st intron | N_Shore | 0.374±0.101 | 0.499±0.193 | -0.124 | 4.25E-02 | 4.71E-06 | -0.223 |
| cg13980266 | 9  | 97022269  | ZNF169    | 5'UTR/1st intron | S_Shore | 0.831±0.143 | 0.955±0.024 | -0.124 | 4.36E-02 | 1.23E-09 | -0.294 |
| cg19443075 | 11 | 2161403   | IGF2      | 5'UTR            | Island  | 0.541±0.074 | 0.665±0.077 | -0.124 | 1.62E-03 | 4.67E-13 | -0.346 |
| cg19702703 | 4  | 7942020   | AFAP1     | TSS1500          | S_Shore | 0.647±0.122 | 0.771±0.138 | -0.124 | 3.61E-02 | 4.86E-16 | -0.385 |
| cg08539991 | 19 | 36203832  | ZBTB32    | 5'UTR            | N_Shelf | 0.536±0.094 | 0.66±0.162  | -0.124 | 2.30E-02 | 9.98E-10 | -0.295 |
| cg00352043 | 22 | 38863594  | KDELR3    | TSS1500          | N_Shore | 0.169±0.103 | 0.292±0.196 | -0.123 | 4.73E-02 | 9.23E-06 | -0.217 |
| cg11509907 | 2  | 235404686 | ARL4C     | 1st exon         | Island  | 0.316±0.094 | 0.439±0.162 | -0.123 | 2.36E-02 | 4.43E-09 | -0.284 |
| cg06032349 | 21 | 40032331  | ERG       | 5'UTR/1st intron | Island  | 0.457±0.105 | 0.58±0.111  | -0.123 | 1.64E-02 | 1.06E-12 | -0.341 |
| cg04369964 | 11 | 63997586  | DNAJC4    | TSS1500          | N_Shore | 0.136±0.051 | 0.259±0.132 | -0.123 | 2.18E-03 | 5.77E-14 | -0.359 |
| cg18347630 | 20 | 39765163  | PLCG1     | TSS1500          | N_Shore | 0.529±0.064 | 0.652±0.082 | -0.123 | 7.17E-04 | 1.06E-07 | -0.258 |
| cg27506082 | 2  | 207139431 | ZDBF2     | 5'UTR/1st exon   | Island  | 0.323±0.065 | 0.446±0.176 | -0.123 | 1.61E-02 | 3.22E-10 | -0.303 |
| cg14293575 | 22 | 18635460  | USP18     | 5'UTR/1st intron | S_Shelf | 0.772±0.113 | 0.895±0.023 | -0.123 | 1.75E-02 | 1.00E-08 | -0.278 |
| cg23837265 | 10 | 88730407  | AGAP11    | TSS200           | S_Shore | 0.592±0.116 | 0.715±0.156 | -0.123 | 3.92E-02 | 1.72E-05 | -0.210 |
| cg05544396 | 16 | 66959780  | RRAD      | TSS1500          | S_Shelf | 0.458±0.064 | 0.581±0.182 | -0.123 | 1.86E-02 | 6.37E-08 | -0.263 |
| cg03802998 | 11 | 44972744  | TP53I11   | 5'UTR/1st exon   | S_Shore | 0.497±0.097 | 0.62±0.132  | -0.123 | 1.64E-02 | 1.96E-05 | -0.209 |
| cg25926515 | 10 | 70321889  | TET1      | 5'UTR/1st intron | S_Shore | 0.598±0.077 | 0.721±0.147 | -0.122 | 1.08E-02 | 9.15E-08 | -0.259 |
| cg08227353 | 10 | 102821670 | KAZALD1   | 1st exon         | Island  | 0.601±0.092 | 0.723±0.174 | -0.122 | 2.86E-02 | 3.39E-57 | -0.680 |
| cg13935127 | 1  | 41128874  | RIMS3     | 5'UTR/1st intron | N_Shelf | 0.731±0.083 | 0.854±0.041 | -0.122 | 3.63E-03 | 3.14E-05 | -0.204 |
| cg02990598 | 19 | 1955419   | CSNK1G2   | 5'UTR/1st intron | S_Shore | 0.583±0.083 | 0.705±0.117 | -0.122 | 6.93E-03 | 9.90E-14 | -0.356 |
| cg02835822 | 11 | 2161456   | IGF2      | 5'UTR            | Island  | 0.491±0.08  | 0.614±0.173 | -0.122 | 2.16E-02 | 3.42E-05 | -0.203 |
| cg09826895 | 1  | 111744309 | DENND2D   | TSS1500          | N_Shelf | 0.69±0.096  | 0.812±0.079 | -0.122 | 8.82E-03 | 1.46E-16 | -0.392 |
| cg16361890 | 5  | 179220545 | LTC45     | TSS1500          | N_Shelf | 0.628±0.077 | 0.75±0.057  | -0.122 | 2.27E-03 | 3.20E-08 | -0.268 |
| cg22341471 | 12 | 123451323 | ABC89     | TSS1500          | S_Shore | 0.343±0.112 | 0.465±0.143 | -0.122 | 3.14E-02 | 6.53E-12 | -0.330 |
| cg19914904 | 10 | 102756165 | LZTS2     | TSS1500          | N_Shore | 0.601±0.085 | 0.722±0.123 | -0.122 | 8.87E-03 | 5.61E-07 | -0.244 |
| cg10322794 | 21 | 47740892  | C21orf58  | 5'UTR/1st intron | N_Shore | 0.575±0.098 | 0.696±0.131 | -0.122 | 1.72E-02 | 6.32E-07 | -0.242 |
| cg25314360 | 6  | 658460    | HUS1B     | TSS1500          | S_Shore | 0.685±0.056 | 0.807±0.058 | -0.122 | 1.66E-04 | 8.79E-06 | -0.217 |
| cg17338403 | 15 | 92395836  | SLCO3A1   | TSS1500          | N_Shore | 0.174±0.049 | 0.296±0.136 | -0.122 | 2.74E-03 | 7.10E-15 | -0.371 |
| cg02945646 | 14 | 24037169  | AP1G2     | TSS1500          | S_Shore | 0.208±0.071 | 0.33±0.185  | -0.121 | 2.36E-02 | 2.09E-13 | -0.351 |
| cg27230534 | 3  | 195267087 | PPP1R2    | 5'UTR/1st intron | N_Shelf | 0.679±0.079 | 0.801±0.025 | -0.121 | 3.04E-03 | 9.05E-17 | -0.394 |
| cg17969560 | 11 | 65324768  | LTBP3     | 5'UTR/1st intron | N_Shore | 0.585±0.126 | 0.706±0.136 | -0.121 | 4.34E-02 | 4.48E-23 | -0.461 |
| cg14993712 | 7  | 138720786 | ZC3HAV1L  | TSS200           | Island  | 0.426±0.13  | 0.547±0.094 | -0.121 | 3.81E-02 | 4.18E-17 | -0.398 |
| cg17103217 | 6  | 33245721  | B3GALT4   | 1st exon         | S_Shore | 0.489±0.057 | 0.611±0.092 | -0.121 | 5.30E-04 | 4.43E-08 | -0.266 |
| cg11432797 | 16 | 29674487  | SPN       | 5'UTR/1st intron | N_Shore | 0.456±0.119 | 0.577±0.131 |        |          |          |        |

|            |    |           |           |                  |         |             |             |        |          |          |        |
|------------|----|-----------|-----------|------------------|---------|-------------|-------------|--------|----------|----------|--------|
| cg14242936 | 12 | 52404134  | GRASP     | TSS200           | S_Shelf | 0.645±0.082 | 0.766±0.047 | -0.121 | 3.67E-03 | 6.77E-33 | -0.542 |
| cg04472726 | 8  | 41386353  | GIN54     | TSS1500          | N_Shore | 0.164±0.073 | 0.285±0.191 | -0.121 | 2.87E-02 | 1.43E-05 | -0.212 |
| cg11159295 | 3  | 52280139  | PPM1M     | TSS200           | Island  | 0.142±0.087 | 0.262±0.176 | -0.121 | 2.80E-02 | 8.32E-23 | -0.458 |
| cg20116128 | 6  | 32161004  | GPSM3     | 5'UTR            | N_Shelf | 0.689±0.03  | 0.81±0.029  | -0.121 | 3.20E-07 | 1.68E-20 | -0.436 |
| cg05605377 | 18 | 47017768  | RPL17     | 5'UTR            | S_Shelf | 0.676±0.102 | 0.797±0.111 | -0.121 | 1.61E-02 | 1.60E-22 | -0.456 |
| cg10575089 | 17 | 56606542  | SEPT4     | 1st exon         | N_Shelf | 0.519±0.066 | 0.64±0.093  | -0.121 | 1.26E-03 | 1.47E-11 | -0.325 |
| cg05819371 | 12 | 92540484  | BTG1      | TSS1500          | S_Shore | 0.107±0.087 | 0.228±0.156 | -0.121 | 1.95E-02 | 1.63E-06 | -0.234 |
| cg25232510 | 8  | 134306223 | NDRG1     | 5'UTR/1st intron | N_Shelf | 0.762±0.124 | 0.882±0.078 | -0.120 | 3.04E-02 | 8.49E-24 | -0.468 |
| cg02241986 | 10 | 5566543   | CALML3    | TSS1500          | N_Shore | 0.435±0.079 | 0.555±0.112 | -0.120 | 5.38E-03 | 1.04E-06 | -0.238 |
| cg18593194 | 19 | 36205201  | ZBTB32    | 5'UTR            | N_Shore | 0.652±0.088 | 0.772±0.119 | -0.120 | 1.00E-02 | 1.74E-06 | -0.233 |
| cg13575298 | 3  | 170626725 | EIF5A2    | TSS1500          | Island  | 0.64±0.085  | 0.76±0.148  | -0.120 | 1.59E-02 | 1.87E-18 | -0.414 |
| cg17629322 | 12 | 131355424 | RAN       | TSS1500          | N_Shore | 0.734±0.074 | 0.854±0.038 | -0.120 | 2.04E-03 | 2.23E-13 | -0.351 |
| cg04207413 | 10 | 126431523 | FAM53B    | 5'UTR/1st intron | Island  | 0.162±0.112 | 0.282±0.147 | -0.120 | 3.49E-02 | 1.02E-05 | -0.215 |
| cg07583420 | 11 | 2158555   | IGF2      | 5'UTR            | N_Shore | 0.073±0.036 | 0.193±0.137 | -0.120 | 2.29E-03 | 1.28E-05 | -0.213 |
| cg14349538 | 7  | 128577651 | IRF5      | 5'UTR/1st intron | N_Shore | 0.424±0.095 | 0.544±0.149 | -0.120 | 2.24E-02 | 5.23E-10 | -0.300 |
| cg26661436 | 5  | 141031071 | FCSD1     | TSS200           | Island  | 0.21±0.087  | 0.329±0.158 | -0.120 | 2.10E-02 | 5.07E-16 | -0.385 |
| cg07602073 | 1  | 228595680 | TRIM11    | TSS1500          | S_Shore | 0.731±0.089 | 0.851±0.027 | -0.120 | 6.48E-03 | 5.36E-09 | -0.282 |
| cg02144874 | 2  | 239047336 | KLHL30    | TSS200           | N_Shelf | 0.666±0.075 | 0.786±0.069 | -0.120 | 2.25E-03 | 1.37E-12 | -0.340 |
| cg18829411 | 21 | 40722023  | HMG1      | TSS1500          | S_Shore | 0.573±0.104 | 0.692±0.151 | -0.119 | 3.08E-02 | 4.88E-08 | -0.265 |
| cg02272599 | 19 | 11267029  | SPC24     | TSS1500          | S_Shore | 0.189±0.048 | 0.308±0.18  | -0.119 | 1.64E-02 | 3.69E-05 | -0.202 |
| cg20321801 | 11 | 2404384   | CDB1      | 5'UTR/1st intron | N_Shelf | 0.48±0.069  | 0.599±0.085 | -0.119 | 1.64E-03 | 1.94E-06 | -0.232 |
| cg08468370 | 19 | 39903678  | PLEKHG2   | TSS1500          | Island  | 0.087±0.075 | 0.206±0.174 | -0.119 | 2.26E-02 | 3.92E-08 | -0.267 |
| cg21175642 | 3  | 48701770  | CELSR3    | TSS1500          | S_Shore | 0.156±0.053 | 0.275±0.188 | -0.119 | 2.17E-02 | 9.33E-13 | -0.342 |
| cg19667304 | 12 | 68043875  | DYRK2     | 5'UTR/1st intron | Island  | 0.075±0.075 | 0.194±0.186 | -0.119 | 2.90E-02 | 1.48E-16 | -0.392 |
| cg25942450 | 5  | 170736251 | TLX3      | TSS200           | Island  | 0.512±0.094 | 0.631±0.152 | -0.119 | 2.41E-02 | 8.89E-06 | -0.217 |
| cg23508786 | 21 | 34775291  | IFNGR2    | 5'UTR/1st exon   | N_Shore | 0.286±0.115 | 0.404±0.166 | -0.119 | 4.89E-02 | 7.51E-07 | -0.241 |
| cg11973623 | 6  | 29760832  | HCG4      | 1st exon         | Island  | 0.131±0.094 | 0.249±0.19  | -0.118 | 4.50E-02 | 2.57E-08 | -0.270 |
| cg04226536 | 11 | 111411071 | LAYN      | 5'UTR/1st intron | Island  | 0.535±0.073 | 0.653±0.076 | -0.118 | 2.04E-03 | 8.48E-08 | -0.260 |
| cg07827420 | 17 | 75371764  | SEPT9     | 5'UTR            | S_Shore | 0.665±0.061 | 0.783±0.037 | -0.118 | 5.98E-04 | 6.87E-10 | -0.298 |
| cg23673107 | 19 | 11908712  | ZNF491    | TSS1500          | N_Shore | 0.365±0.101 | 0.483±0.114 | -0.118 | 1.81E-02 | 6.30E-06 | -0.220 |
| cg18568589 | 19 | 9609395   | ZNF560    | TSS200           | S_Shore | 0.572±0.127 | 0.69±0.115  | -0.118 | 4.32E-02 | 1.32E-07 | -0.256 |
| cg17641710 | 3  | 50279038  | GNAI2     | 5'UTR/1st intron | S_Shelf | 0.683±0.05  | 0.801±0.038 | -0.118 | 9.60E-05 | 1.97E-07 | -0.253 |
| cg14044426 | 6  | 32160798  | GPSM3     | 5'UTR            | N_Shelf | 0.613±0.052 | 0.73±0.061  | -0.118 | 1.25E-04 | 5.52E-13 | -0.345 |
| cg03098721 | 1  | 84464084  | TLL7      | 5'UTR/1st intron | N_Shore | 0.543±0.081 | 0.661±0.203 | -0.118 | 4.62E-02 | 1.61E-08 | -0.274 |
| cg14556683 | 19 | 15342982  | EPHX3     | 1st exon         | N_Shore | 0.603±0.035 | 0.72±0.067  | -0.117 | 5.34E-06 | 2.71E-09 | -0.288 |
| cg10416593 | 22 | 50966123  | SCO2      | TSS1500          | Island  | 0.659±0.084 | 0.776±0.106 | -0.117 | 7.91E-03 | 8.08E-11 | -0.313 |
| cg16534854 | 5  | 170815995 | NPM1      | 5'UTR/1st intron | S_Shore | 0.029±0.019 | 0.146±0.222 | -0.117 | 3.97E-02 | 9.84E-07 | -0.238 |
| cg19713429 | 1  | 19810690  | CAPZB     | 1st exon         | N_Shore | 0.306±0.09  | 0.423±0.186 | -0.117 | 4.15E-02 | 1.40E-09 | -0.293 |
| cg11507178 | 11 | 118781515 | BCL9L     | 5'UTR/1st exon   | Island  | 0.17±0.074  | 0.287±0.153 | -0.117 | 1.53E-02 | 3.91E-06 | -0.225 |
| cg02633117 | 19 | 17187589  | MYO9B     | 5'UTR/1st intron | S_Shore | 0.175±0.065 | 0.292±0.181 | -0.117 | 2.41E-02 | 3.75E-09 | -0.285 |
| cg02633117 | 19 | 17187589  | HAUS8     | TSS1500          | S_Shore | 0.175±0.065 | 0.292±0.181 | -0.117 | 2.41E-02 | 1.30E-05 | -0.213 |
| cg10512278 | 16 | 68027839  | DPEP2     | 5'UTR/1st intron | S_Shore | 0.685±0.048 | 0.802±0.029 | -0.117 | 1.01E-04 | 4.18E-26 | -0.489 |
| cg21703322 | 11 | 111411076 | LAYN      | 5'UTR/1st intron | Island  | 0.547±0.063 | 0.664±0.081 | -0.116 | 9.55E-04 | 7.49E-08 | -0.261 |
| cg02516189 | 9  | 139268092 | CARD9     | 5'UTR/1st exon   | S_Shelf | 0.447±0.103 | 0.564±0.069 | -0.116 | 1.56E-02 | 2.93E-12 | -0.335 |
| cg00747290 | 2  | 42721154  | KCNQ3     | 5'UTR/1st exon   | Island  | 0.342±0.102 | 0.458±0.139 | -0.116 | 2.87E-02 | 1.29E-06 | -0.236 |
| cg23906687 | 2  | 239047029 | KLHL30    | TSS1500          | N_Shelf | 0.603±0.082 | 0.719±0.1   | -0.116 | 6.56E-03 | 3.94E-05 | -0.201 |
| cg19628988 | 5  | 139040928 | CXKC5     | 5'UTR/1st intron | Island  | 0.668±0.095 | 0.784±0.129 | -0.116 | 1.99E-02 | 4.11E-05 | -0.201 |
| cg15146125 | 2  | 96991753  | ITPR1L1   | 5'UTR/1st intron | S_Shore | 0.318±0.046 | 0.434±0.156 | -0.116 | 8.61E-03 | 4.33E-10 | -0.301 |
| cg01109047 | 2  | 120979401 | TMEM185B  | 1st exon/3'UTR   | N_Shore | 0.767±0.058 | 0.882±0.046 | -0.115 | 4.08E-04 | 2.12E-08 | -0.272 |
| cg27075724 | 21 | 18985387  | BTG3      | TSS200           | Island  | 0.039±0.019 | 0.154±0.19  | -0.115 | 2.12E-02 | 3.42E-05 | -0.203 |
| cg15166332 | 10 | 35929604  | FZD8      | 1st exon         | Island  | 0.102±0.112 | 0.217±0.158 | -0.115 | 4.92E-02 | 8.40E-08 | -0.260 |
| cg21800196 | 3  | 48673931  | SLC26A6   | TSS1500          | N_Shelf | 0.663±0.099 | 0.777±0.046 | -0.114 | 1.35E-02 | 2.81E-15 | -0.376 |
| cg15747595 | 8  | 98289880  | TSPYL5    | 1st exon         | Island  | 0.589±0.088 | 0.704±0.093 | -0.114 | 9.46E-03 | 2.86E-12 | -0.335 |
| cg05117208 | 17 | 40438312  | STAT5A    | TSS1500          | N_Shore | 0.74±0.062  | 0.855±0.056 | -0.114 | 7.51E-04 | 4.76E-21 | -0.441 |
| cg10132208 | 19 | 58545542  | ZSCAN1    | 5'UTR/1st intron | Island  | 0.559±0.04  | 0.673±0.071 | -0.114 | 3.04E-05 | 3.38E-07 | -0.248 |
| cg12411858 | 22 | 20863268  | MED15     | 5'UTR/1st intron | S_Shore | 0.674±0.035 | 0.788±0.057 | -0.114 | 3.66E-06 | 4.51E-16 | -0.386 |
| cg07856975 | 6  | 36356162  | ETV7      | TSS1500          | S_Shore | 0.724±0.118 | 0.838±0.101 | -0.114 | 3.58E-02 | 3.53E-16 | -0.387 |
| cg17476421 | 19 | 19844057  | ZNF14     | TSS200           | S_Shore | 0.072±0.035 | 0.186±0.144 | -0.114 | 4.91E-03 | 5.05E-12 | -0.331 |
| cg03760951 | 11 | 2160875   | IGF2      | 5'UTR            | Island  | 0.578±0.07  | 0.692±0.15  | -0.114 | 1.46E-02 | 8.55E-22 | -0.449 |
| cg09747445 | 15 | 70387268  | TLE3      | TSS200           | N_Shore | 0.705±0.059 | 0.819±0.037 | -0.114 | 5.67E-04 | 3.86E-06 | -0.225 |
| cg18731055 | 13 | 49108131  | RCBTB2    | TSS1500          | S_Shore | 0.659±0.127 | 0.772±0.055 | -0.113 | 4.05E-02 | 7.54E-06 | -0.219 |
| cg14871225 | 5  | 139040820 | CXKC5     | 5'UTR/1st intron | Island  | 0.592±0.078 | 0.706±0.113 | -0.113 | 7.93E-03 | 3.26E-07 | -0.248 |
| cg05355142 | 1  | 1851372   | TMEM52    | TSS1500          | Island  | 0.384±0.069 | 0.497±0.185 | -0.113 | 3.28E-02 | 1.50E-05 | -0.212 |
| cg18669588 | 3  | 52274051  | TWF2      | TSS1500          | S_Shore | 0.632±0.078 | 0.745±0.103 | -0.113 | 6.63E-03 | 3.57E-06 | -0.226 |
| cg13766044 | 17 | 39968772  | FKBP10    | TSS200           | S_Shore | 0.103±0.04  | 0.216±0.106 | -0.113 | 6.14E-04 | 7.75E-10 | -0.297 |
| cg20582800 | 6  | 43612764  | RSPH9     | TSS200           | Island  | 0.53±0.064  | 0.643±0.065 | -0.113 | 1.03E-03 | 3.75E-05 | -0.202 |
| cg10219957 | 1  | 1851416   | TMEM52    | TSS1500          | S_Shore | 0.644±0.094 | 0.757±0.114 | -0.113 | 1.80E-02 | 3.82E-11 | -0.318 |
| cg15286372 | 6  | 53659348  | LRRC1     | TSS1500          | Island  | 0.076±0.036 | 0.189±0.203 | -0.113 | 3.48E-02 | 2.30E-07 | -0.252 |
| cg12485428 | 17 | 1549098   | SCARF1    | TSS200           | S_Shore | 0.607±0.063 | 0.72±0.037  | -0.112 | 1.06E-03 | 6.29E-12 | -0.330 |
| cg07351675 | 7  | 1578263   | MAFK      | 5'UTR/1st intron | S_Shelf | 0.834±0.082 | 0.946±0.026 | -0.112 | 6.01E-03 | 1.72E-05 | -0.210 |
| cg01834776 | 14 | 24898905  | KHNYN     | TSS1500          | Island  | 0.219±0.102 | 0.331±0.149 | -0.112 | 3.83E-02 | 1.63E-06 | -0.234 |
| cg20339650 | 11 | 2160882   | IGF2      | 5'UTR            | Island  | 0.486±0.096 | 0.598±0.167 | -0.112 | 4.15E-02 | 7.57E-19 | -0.418 |
| cg21693907 | 1  | 203595061 | ATP2B4    | TSS1500          | N_Shelf | 0.176±0.087 | 0.288±0.112 | -0.112 | 1.28E-02 | 1.36E-06 | -0.235 |
| cg25410668 | 1  | 28241577  | RPA2      | TSS1500          | S_Shore | 0.691±0.125 | 0.803±0.075 | -0.112 | 4.19E-02 | 1.22E-06 | -0.236 |
| cg17283169 | 10 | 5567524   | CALML3    | 1st exon/3'UTR   | Island  | 0.789±0.107 | 0.9±0.03    | -0.111 | 2.15E-02 | 1.19E-46 | -0.628 |
| cg22678398 | 3  | 152884214 | RAP2B     | 1st exon/3'UTR   | S_Shelf | 0.703±0.058 | 0.815±0.038 | -0.111 | 6.27E-04 | 1.88E-10 | -0.307 |
| cg12306853 | 6  | 143833173 | FUCA2     | TSS200           | S_Shore | 0.653±0.121 | 0.764±0.12  | -0.111 | 4.88E-02 | 7.25E-15 | -0.371 |
| cg03457485 | 11 | 63753251  | OTUB1     | TSS200           | N_Shore | 0.346±0.102 | 0.457±0.163 | -0.111 | 4.68E-02 | 1.04E-07 | -0.258 |
| cg26476820 | 2  | 85637851  | CAPG      | 5'UTR/1st intron | N_Shelf | 0.707±0.073 | 0.818±0.077 | -0.111 | 3.41E-03 | 2.41E-12 | -0.336 |
| cg00591660 | 16 | 2478353   | CCNF      | TSS1500          | N_Shore | 0.654±0.077 | 0.765±0.062 | -0.111 | 4.24E-03 | 1.61E-09 | -0.292 |
| cg21534299 | 1  | 44821474  | ERI3      | TSS1500          | S_Shore | 0.738±0.115 | 0.848±0.031 | -0.111 | 2.99E-02 | 7.98E-08 | -0.261 |
| cg09961550 | 16 | 21531948  | SLC7A5P2  | TSS200           | Island  | 0.402±0.124 | 0.512±0.104 | -0.110 | 4.95E-02 | 3.89E-08 | -0.267 |
| cg25923056 | 19 | 41306455  | EGLN2     | 5'UTR            | S_Shore | 0.55±0.042  | 0.66±0.125  | -0.110 | 2.76E-03 | 9.28E-06 | -0.216 |
| cg19429281 | 19 | 53496738  | ZNF702P   | 1st exon         | Island  | 0.625±0.077 | 0.735±0.168 | -0.110 | 3.11E-02 | 2.38E-21 | -0.444 |
| cg05280131 | 2  | 132248998 | LOC150776 | TSS1500          | N_Shore | 0.331±0.106 | 0.441±0.151 | -0.110 | 4.64E-02 | 4.08E-08 | -0.266 |
| cg01745499 | 6  | 34206084  | HMG1      | 5'UTR            | Island  | 0.146±0.056 | 0.256±0.19  | -0.110 | 3.53E-02 | 1.45E-14 | -0.367 |
| cg14843030 | 1  | 32716051  | LCK       | TSS1500          | S_Shore | 0.441±0.079 | 0.551±0.087 | -0.110 | 6.42E-03 | 5.75E-08 | -0.26  |

|            |    |           |                  |                  |         |             |             |        |          |          |        |
|------------|----|-----------|------------------|------------------|---------|-------------|-------------|--------|----------|----------|--------|
| cg18081258 | 14 | 21494161  | <i>NDRG2</i>     | 5'UTR/1st intron | Island  | 0.542±0.06  | 0.652±0.202 | -0.110 | 4.62E-02 | 2.82E-26 | -0.490 |
| cg11278602 | 6  | 29760757  | <i>HCG4</i>      | 1st exon         | Island  | 0.072±0.015 | 0.182±0.146 | -0.110 | 6.95E-03 | 1.59E-06 | -0.234 |
| cg05921324 | 11 | 116694114 | <i>APOA4</i>     | TSS200           | S_Shore | 0.563±0.089 | 0.673±0.109 | -0.110 | 1.51E-02 | 3.12E-05 | -0.204 |
| cg15026089 | 1  | 19640712  | <i>PQLC2</i>     | 5'UTR            | S_Shore | 0.698±0.049 | 0.808±0.041 | -0.110 | 1.41E-04 | 4.98E-10 | -0.300 |
| cg01357925 | 6  | 53658617  | <i>LRRC1</i>     | TSS1500          | N_Shore | 0.017±0.005 | 0.127±0.164 | -0.110 | 1.14E-02 | 6.84E-06 | -0.220 |
| cg07549715 | 20 | 3024204   | <i>GNRH2</i>     | TSS200           | N_Shelf | 0.623±0.081 | 0.732±0.065 | -0.110 | 5.91E-03 | 4.68E-10 | -0.301 |
| cg16377367 | 1  | 85743497  | <i>BCL10</i>     | TSS1500          | S_Shore | 0.814±0.105 | 0.924±0.012 | -0.109 | 2.13E-02 | 2.92E-09 | -0.287 |
| cg13845105 | 12 | 112846051 | <i>RPL6</i>      | 5'UTR            | N_Shore | 0.681±0.054 | 0.79±0.127  | -0.109 | 5.23E-03 | 8.49E-15 | -0.370 |
| cg01753198 | 16 | 70560099  | <i>SF3B3</i>     | 5'UTR/1st intron | S_Shelf | 0.713±0.046 | 0.822±0.104 | -0.109 | 1.10E-03 | 4.16E-08 | -0.266 |
| cg15114651 | 19 | 47289410  | <i>SLC1A5</i>    | 5'UTR/1st intron | N_Shore | 0.467±0.099 | 0.576±0.156 | -0.109 | 4.40E-02 | 1.32E-20 | -0.437 |
| cg03591223 | 14 | 23388579  | <i>RBM23</i>     | TSS200           | Island  | 0.048±0.005 | 0.157±0.183 | -0.109 | 2.16E-02 | 2.20E-33 | -0.546 |
| cg26056577 | 1  | 6526583   | <i>TNFRSF25</i>  | TSS1500          | N_Shelf | 0.719±0.082 | 0.828±0.036 | -0.109 | 6.57E-03 | 1.52E-09 | -0.292 |
| cg22129364 | 1  | 53067894  | <i>GPX7</i>      | TSS200           | Island  | 0.268±0.103 | 0.376±0.153 | -0.109 | 4.74E-02 | 9.39E-25 | -0.477 |
| cg07026490 | 16 | 57837114  | <i>KIFC3</i>     | TSS1500          | S_Shore | 0.589±0.059 | 0.698±0.066 | -0.108 | 8.40E-04 | 2.73E-06 | -0.229 |
| cg01780943 | 1  | 211499648 | <i>TRAF5</i>     | TSS1500          | N_Shore | 0.35±0.081  | 0.458±0.116 | -0.108 | 1.31E-02 | 9.87E-15 | -0.369 |
| cg26057752 | 7  | 44104935  | <i>PGAM2</i>     | 1st exon         | Island  | 0.558±0.108 | 0.666±0.094 | -0.108 | 3.02E-02 | 2.67E-16 | -0.389 |
| cg04908625 | 3  | 123166882 | <i>ADCY5</i>     | 1st exon         | Island  | 0.639±0.046 | 0.747±0.065 | -0.108 | 1.10E-04 | 4.67E-13 | -0.346 |
| cg04064675 | 11 | 19139135  | <i>ZDHHC13</i>   | 5'UTR/1st intron | Island  | 0.117±0.074 | 0.225±0.192 | -0.108 | 4.92E-02 | 2.80E-09 | -0.287 |
| cg18439358 | 17 | 41910968  | <i>MPP3</i>      | TSS1500          | S_Shore | 0.085±0.056 | 0.193±0.162 | -0.108 | 1.91E-02 | 1.66E-06 | -0.233 |
| cg12992443 | 20 | 35093928  | <i>DLGAP4</i>    | 5'UTR/1st intron | S_Shelf | 0.71±0.068  | 0.818±0.017 | -0.108 | 2.66E-03 | 3.19E-14 | -0.362 |
| cg20455854 | 5  | 139040849 | <i>CXKC5</i>     | 5'UTR/1st intron | Island  | 0.639±0.084 | 0.747±0.122 | -0.108 | 1.71E-02 | 1.31E-07 | -0.256 |
| cg19738774 | 11 | 68778850  | <i>MRGPRF</i>    | 5'UTR/1st intron | Island  | 0.421±0.058 | 0.529±0.174 | -0.108 | 2.78E-02 | 4.58E-11 | -0.317 |
| cg15709065 | 3  | 134090737 | <i>AMOTL2</i>    | 5'UTR/1st intron | N_Shore | 0.64±0.065  | 0.747±0.111 | -0.108 | 5.34E-03 | 5.75E-11 | -0.315 |
| cg17462140 | 11 | 2162363   | <i>IGF2</i>      | 5'UTR            | Island  | 0.463±0.078 | 0.57±0.14   | -0.108 | 2.01E-02 | 2.83E-05 | -0.205 |
| cg17150663 | 7  | 128551672 | <i>KCP</i>       | TSS1500          | S_Shore | 0.622±0.052 | 0.729±0.075 | -0.107 | 4.61E-04 | 1.20E-08 | -0.276 |
| cg01385679 | 20 | 45033155  | <i>ELMO2</i>     | 5'UTR/1st intron | N_Shore | 0.655±0.096 | 0.762±0.079 | -0.107 | 1.81E-02 | 4.41E-06 | -0.224 |
| cg23366166 | 11 | 125366506 | <i>FEZ1</i>      | TSS1500          | S_Shore | 0.574±0.073 | 0.681±0.151 | -0.107 | 2.28E-02 | 1.28E-05 | -0.213 |
| cg23882186 | 2  | 99065421  | <i>INPP4A</i>    | 5'UTR/1st intron | S_Shelf | 0.804±0.06  | 0.911±0.025 | -0.107 | 1.27E-03 | 1.19E-06 | -0.237 |
| cg20186396 | 17 | 80275498  | <i>CD7</i>       | TSS200           | N_Shelf | 0.628±0.072 | 0.735±0.057 | -0.107 | 3.52E-03 | 2.76E-19 | -0.423 |
| cg21658277 | 22 | 39745603  | <i>SYNGR1</i>    | TSS1500          | N_Shore | 0.145±0.077 | 0.252±0.133 | -0.107 | 1.72E-02 | 3.87E-14 | -0.361 |
| cg18707845 | 15 | 32909968  | <i>ARHGAP11A</i> | 5'UTR            | S_Shelf | 0.728±0.083 | 0.835±0.066 | -0.107 | 8.01E-03 | 1.82E-16 | -0.391 |
| cg00869668 | 17 | 1549012   | <i>SCARF1</i>    | 1st exon         | S_Shore | 0.641±0.057 | 0.748±0.055 | -0.107 | 6.16E-04 | 2.22E-11 | -0.322 |
| cg10249734 | 17 | 80292079  | <i>SECTM1</i>    | TSS200           | Island  | 0.743±0.086 | 0.849±0.027 | -0.107 | 9.68E-03 | 2.29E-24 | -0.473 |
| cg05836145 | 7  | 20827117  | <i>SP8</i>       | TSS1500          | S_Shore | 0.43±0.06   | 0.537±0.135 | -0.106 | 1.06E-02 | 8.76E-07 | -0.239 |
| cg02075820 | 11 | 17300909  | <i>NUCB2</i>     | 5'UTR/1st intron | S_Shelf | 0.59±0.1    | 0.696±0.092 | -0.106 | 2.42E-02 | 1.36E-14 | -0.367 |
| cg07161827 | 2  | 71680559  | <i>DYSF</i>      | TSS200           | Island  | 0.143±0.055 | 0.25±0.19   | -0.106 | 4.07E-02 | 2.16E-14 | -0.365 |
| cg07324245 | 17 | 75445905  | <i>SEPT9</i>     | TSS1500          | N_Shore | 0.549±0.097 | 0.655±0.16  | -0.106 | 4.95E-02 | 5.68E-12 | -0.331 |
| cg06674062 | 7  | 94285887  | <i>SGCE</i>      | TSS1500          | Island  | 0.469±0.053 | 0.575±0.162 | -0.106 | 2.02E-02 | 2.60E-25 | -0.482 |
| cg06674062 | 7  | 94285887  | <i>PEG10</i>     | 5'UTR/1st exon   | Island  | 0.469±0.053 | 0.575±0.162 | -0.106 | 2.02E-02 | 4.61E-09 | -0.284 |
| cg18273817 | 1  | 8936178   | <i>ENO1</i>      | 5'UTR/1st intron | N_Shore | 0.691±0.114 | 0.797±0.088 | -0.106 | 3.94E-02 | 4.21E-21 | -0.442 |
| cg25320328 | 1  | 92953037  | <i>GFI1</i>      | TSS1500          | S_Shore | 0.548±0.079 | 0.654±0.159 | -0.106 | 3.28E-02 | 1.63E-06 | -0.234 |
| cg16836311 | 1  | 25944712  | <i>MAN1C1</i>    | 1st exon         | S_Shore | 0.771±0.076 | 0.876±0.147 | -0.106 | 2.42E-02 | 3.48E-05 | -0.202 |
| cg24047810 | 11 | 2162341   | <i>IGF2</i>      | 5'UTR            | Island  | 0.562±0.065 | 0.668±0.107 | -0.106 | 5.22E-03 | 1.91E-06 | -0.232 |
| cg07969769 | 5  | 49961846  | <i>PARP8</i>     | 5'UTR/1st exon   | N_Shore | 0.224±0.084 | 0.329±0.086 | -0.105 | 1.10E-02 | 4.28E-06 | -0.224 |
| cg19692584 | 10 | 96161889  | <i>TBC1D12</i>   | TSS1500          | N_Shore | 0.763±0.092 | 0.868±0.046 | -0.105 | 1.42E-02 | 1.81E-05 | -0.210 |
| cg14160518 | 20 | 50418952  | <i>SALL4</i>     | 5'UTR/1st exon   | Island  | 0.768±0.103 | 0.873±0.065 | -0.105 | 2.50E-02 | 6.44E-20 | -0.429 |
| cg05753799 | 20 | 3746315   | <i>C20orf27</i>  | 5'UTR/1st intron | N_Shore | 0.641±0.068 | 0.746±0.046 | -0.105 | 2.59E-03 | 5.68E-06 | -0.221 |
| cg02971262 | 9  | 139925395 | <i>C9orf139</i>  | 5'UTR/1st intron | S_Shore | 0.39±0.102  | 0.495±0.13  | -0.105 | 4.12E-02 | 1.70E-06 | -0.233 |
| cg06285333 | 16 | 67516546  | <i>ATP6V0D1</i>  | TSS1500          | S_Shore | 0.724±0.04  | 0.829±0.022 | -0.105 | 7.62E-05 | 4.79E-06 | -0.223 |
| cg19473623 | 7  | 7224869   | <i>C1GALT1</i>   | 5'UTR/1st intron | S_Shore | 0.733±0.071 | 0.837±0.068 | -0.104 | 3.72E-03 | 2.36E-28 | -0.507 |
| cg02610070 | 1  | 228673723 | <i>RNF187</i>    | TSS1500          | N_Shore | 0.643±0.079 | 0.748±0.12  | -0.104 | 1.61E-02 | 3.75E-07 | -0.247 |
| cg04057642 | 17 | 45730222  | <i>KPNB1</i>     | 5'UTR            | S_Shore | 0.719±0.103 | 0.823±0.065 | -0.104 | 2.54E-02 | 6.12E-10 | -0.299 |
| cg00152942 | 16 | 57125755  | <i>CPNE2</i>     | TSS1500          | N_Shore | 0.691±0.05  | 0.795±0.082 | -0.104 | 7.34E-04 | 6.66E-08 | -0.262 |
| cg13502716 | 3  | 52281709  | <i>PPM1M</i>     | 5'UTR            | S_Shore | 0.78±0.102  | 0.884±0.032 | -0.104 | 2.40E-02 | 6.87E-17 | -0.396 |
| cg15253816 | 17 | 66255259  | <i>ARSG</i>      | TSS200           | Island  | 0.273±0.095 | 0.377±0.146 | -0.104 | 4.37E-02 | 6.79E-13 | -0.344 |
| cg21886367 | 14 | 24780825  | <i>LTB4R</i>     | 5'UTR/1st exon   | Island  | 0.498±0.078 | 0.602±0.175 | -0.104 | 4.72E-02 | 1.11E-16 | -0.393 |
| cg16359169 | 19 | 12076030  | <i>ZNF763</i>    | 5'UTR/1st intron | Island  | 0.149±0.061 | 0.252±0.121 | -0.103 | 8.20E-03 | 1.87E-09 | -0.291 |
| cg23616741 | 7  | 44105434  | <i>PGAM2</i>     | TSS1500          | S_Shore | 0.43±0.053  | 0.533±0.183 | -0.103 | 3.93E-02 | 4.83E-10 | -0.300 |
| cg21395519 | 3  | 122746985 | <i>SEMA5B</i>    | TSS1500          | Island  | 0.126±0.058 | 0.229±0.154 | -0.103 | 2.09E-02 | 1.04E-05 | -0.215 |
| cg02592727 | 19 | 55574733  | <i>RDH13</i>     | 5'UTR            | Island  | 0.159±0.078 | 0.262±0.17  | -0.103 | 4.44E-02 | 4.77E-12 | -0.332 |
| cg09138671 | 1  | 20125846  | <i>TMCO4</i>     | 5'UTR/1st intron | N_Shore | 0.255±0.094 | 0.358±0.144 | -0.103 | 4.26E-02 | 1.46E-10 | -0.309 |
| cg15272684 | 1  | 36024473  | <i>NCN1</i>      | 5'UTR/1st intron | S_Shore | 0.675±0.092 | 0.778±0.055 | -0.103 | 1.56E-02 | 4.90E-16 | -0.385 |
| cg15272684 | 1  | 36024473  | <i>KIAA0319L</i> | TSS1500          | S_Shore | 0.675±0.092 | 0.778±0.055 | -0.103 | 1.56E-02 | 4.72E-06 | -0.223 |
| cg25763292 | 10 | 115442231 | <i>CASP7</i>     | 5'UTR/1st intron | S_Shelf | 0.762±0.059 | 0.865±0.025 | -0.103 | 1.35E-03 | 1.11E-06 | -0.237 |
| cg27427527 | 15 | 71146902  | <i>LARP6</i>     | TSS1500          | S_Shore | 0.134±0.078 | 0.236±0.153 | -0.103 | 3.69E-02 | 1.28E-07 | -0.257 |
| cg09349343 | 6  | 33245717  | <i>B3GALT4</i>   | 1st exon         | S_Shore | 0.481±0.052 | 0.584±0.058 | -0.102 | 4.44E-04 | 4.48E-08 | -0.265 |
| cg13892570 | 1  | 159893182 | <i>TAGLN2</i>    | 5'UTR/1st intron | N_Shore | 0.102±0.058 | 0.204±0.146 | -0.102 | 1.76E-02 | 1.46E-26 | -0.493 |
| cg13660372 | 7  | 94285873  | <i>SGCE</i>      | TSS1500          | Island  | 0.516±0.046 | 0.618±0.129 | -0.102 | 7.07E-03 | 3.28E-27 | -0.498 |
| cg13660372 | 7  | 94285873  | <i>PEG10</i>     | 5'UTR/1st exon   | Island  | 0.516±0.046 | 0.618±0.129 | -0.102 | 7.07E-03 | 3.29E-13 | -0.349 |
| cg23336810 | 21 | 43936497  | <i>SLC37A1</i>   | 5'UTR            | S_Shore | 0.755±0.114 | 0.857±0.017 | -0.102 | 3.98E-02 | 5.90E-28 | -0.504 |
| cg03137131 | 4  | 23666672  | <i>ZFYVE28</i>   | TSS200           | Island  | 0.533±0.033 | 0.635±0.122 | -0.102 | 3.34E-03 | 2.62E-05 | -0.206 |
| cg26678012 | 15 | 78857577  | <i>CHRNA5</i>    | TSS1500          | N_Shore | 0.108±0.061 | 0.21±0.139  | -0.102 | 1.54E-02 | 1.41E-05 | -0.212 |
| cg01519063 | 8  | 102505293 | <i>GRHL2</i>     | 5'UTR/1st intron | S_Shore | 0.691±0.087 | 0.793±0.111 | -0.102 | 2.26E-02 | 2.04E-26 | -0.491 |
| cg06970461 | 2  | 96782027  | <i>ADRA2B</i>    | TSS200           | Island  | 0.442±0.093 | 0.544±0.143 | -0.101 | 4.29E-02 | 3.51E-11 | -0.319 |
| cg07813265 | 1  | 100820528 | <i>CDC14A</i>    | 5'UTR            | S_Shore | 0.743±0.074 | 0.844±0.063 | -0.101 | 5.93E-03 | 1.83E-10 | -0.307 |
| cg14207210 | 17 | 56833195  | <i>PPM1E</i>     | TSS200           | Island  | 0.128±0.058 | 0.229±0.173 | -0.101 | 3.76E-02 | 6.93E-06 | -0.219 |
| cg20576160 | 8  | 17016860  | <i>ZDHHC2</i>    | 5'UTR/1st intron | S_Shelf | 0.728±0.078 | 0.828±0.106 | -0.101 | 1.44E-02 | 4.84E-07 | -0.245 |
| cg19278744 | 4  | 78079628  | <i>CCNG2</i>     | 5'UTR/1st intron | S_Shore | 0.197±0.065 | 0.297±0.172 | -0.100 | 4.13E-02 | 7.57E-06 | -0.219 |
| cg01418527 | 7  | 5631189   | <i>FSCN1</i>     | TSS1500          | N_Shore | 0.7±0.085   | 0.801±0.159 | -0.100 | 4.83E-02 | 4.54E-13 | -0.347 |
| cg04926767 | 11 | 62476194  | <i>BSCCL2</i>    | TSS1500          | N_Shore | 0.677±0.041 | 0.777±0.042 | -0.100 | 4.98E-05 | 3.58E-06 | -0.226 |
| cg00653615 | 1  | 151029327 | <i>CDC42SE1</i>  | 5'UTR/1st intron | N_Shelf | 0.429±0.076 | 0.53±0.114  | -0.100 | 1.55E-02 | 1.08E-09 | -0.295 |

<sup>a</sup>Probe IDs for the Infinium MethylationEPIC BeadChip (Illumina). <sup>b</sup>National Center for Biotechnology Information (NCBI) Database (Genome Build 37/hg19). <sup>c</sup>TSS1500, from 200 bp upstream of the transcription start site (TSS) to 1500 bp upstream of it; TSS200, from the TSS to 200 bp upstream of it; UTR, untranslated region; Gene body, second exon and downstream on the RefSeq database (<http://www.ncbi.nlm.nih.gov/refseq/>). <sup>d</sup>N-Shelf, 2000 bp region 5' adjacent to N-Shore; N-Shore, 2000 bp region 5' adjacent to CpG island; S-Shore, 2000 bp region 3' adjacent to SShore based on the UCSC Genome Browser (<https://genome.ucsc.edu/>). <sup>e</sup>Evaluated using the Cancer Genome Atlas database (<https://www.cancer.gov/about-nci/organization/ccg/research/structural-genomics/tcga>).

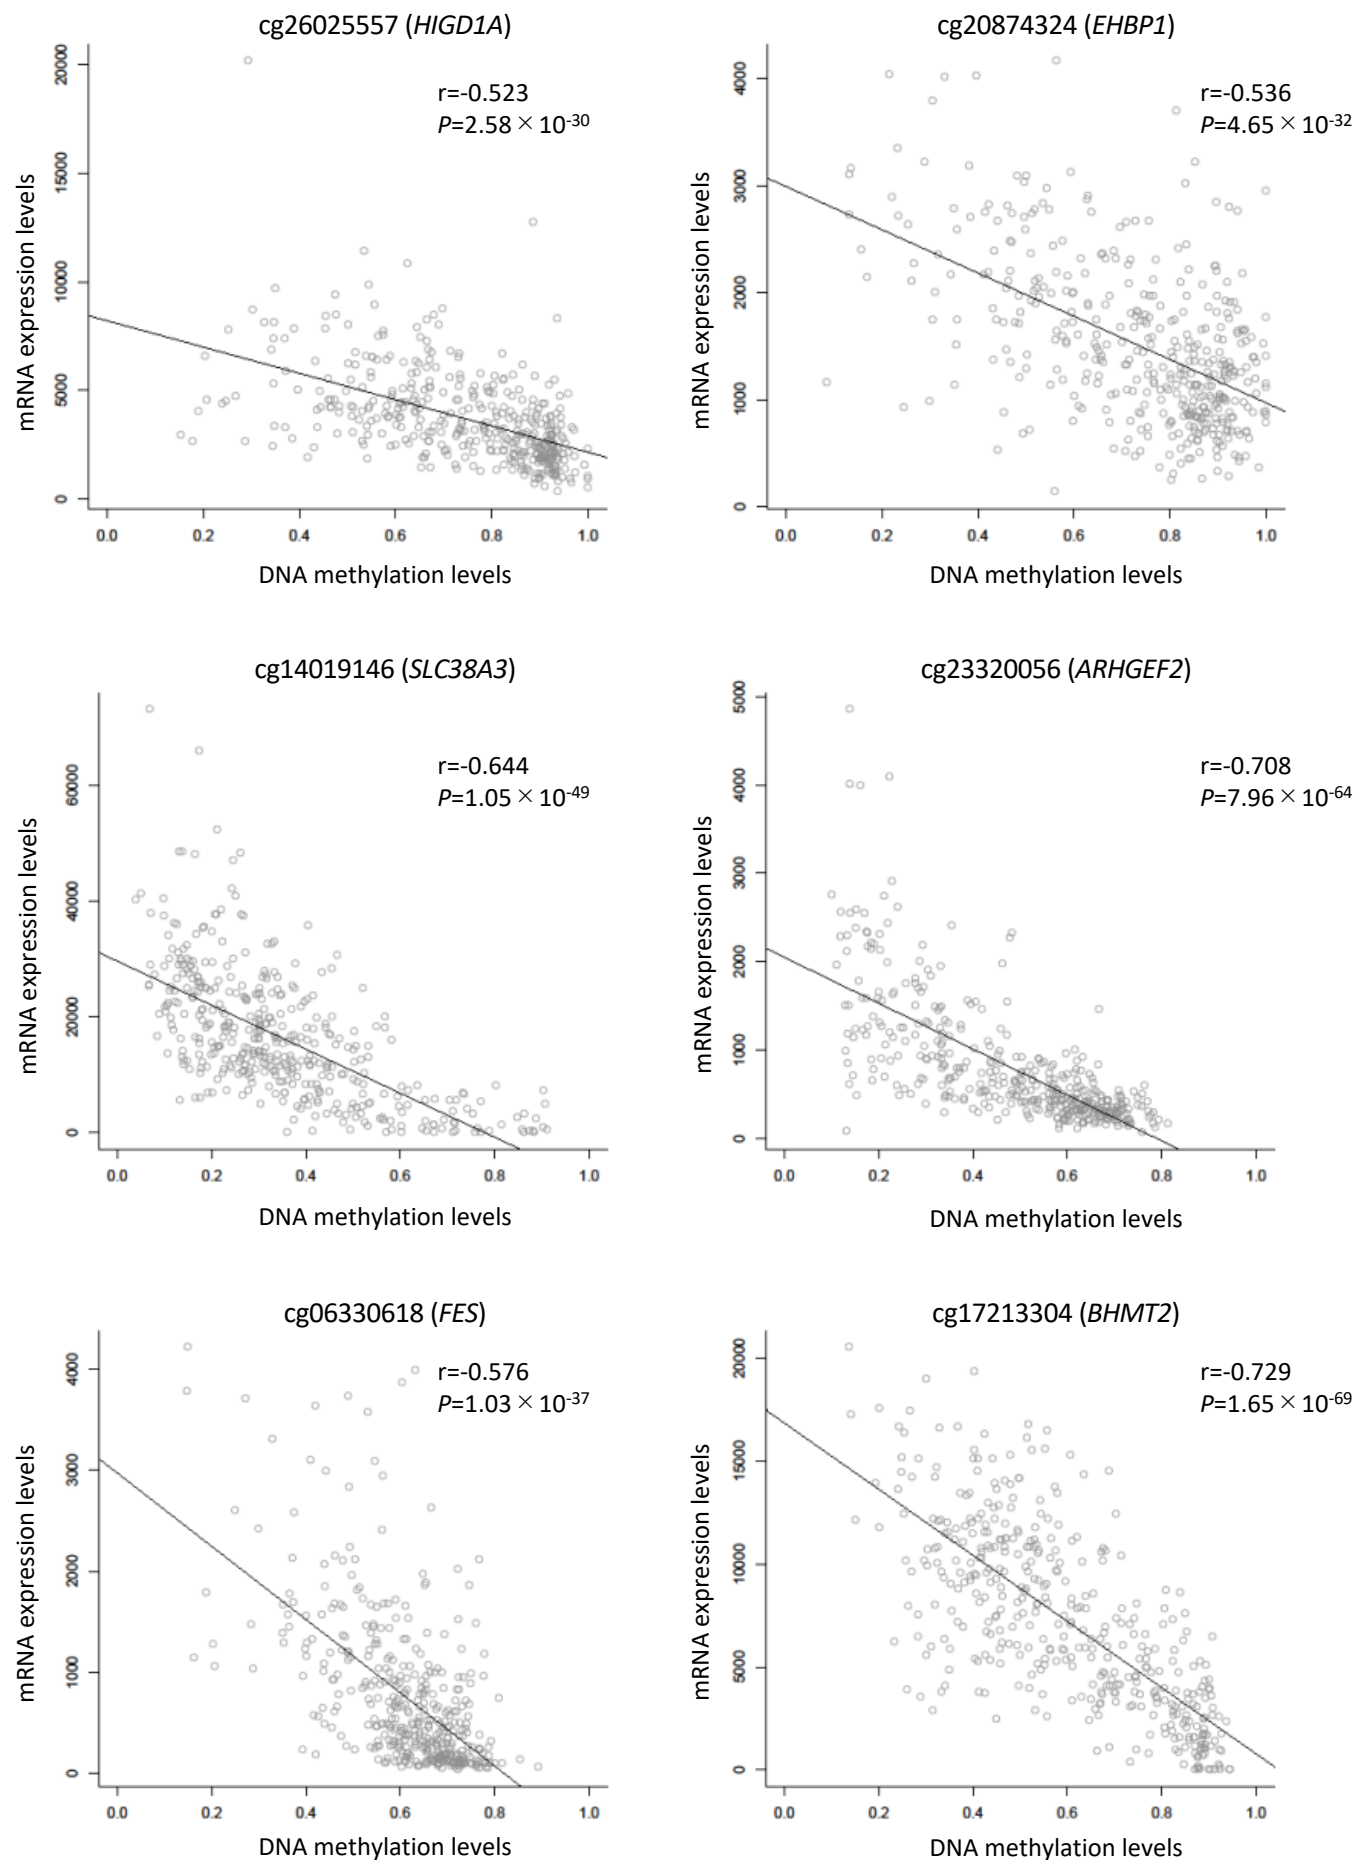

**Supplementary Fig. 1** Significant inverse correlation between levels of DNA methylation and mRNA expression at representative CpG sites based on the data for non-cancerous and cancerous liver tissue deposited in the The Cancer Genome Atlas database (<https://www.cancer.gov/about-nci/organization/ccg/research/structural-genomics/tcga>). Infinium probe IDs and gene symbols are shown at the top of each panel.

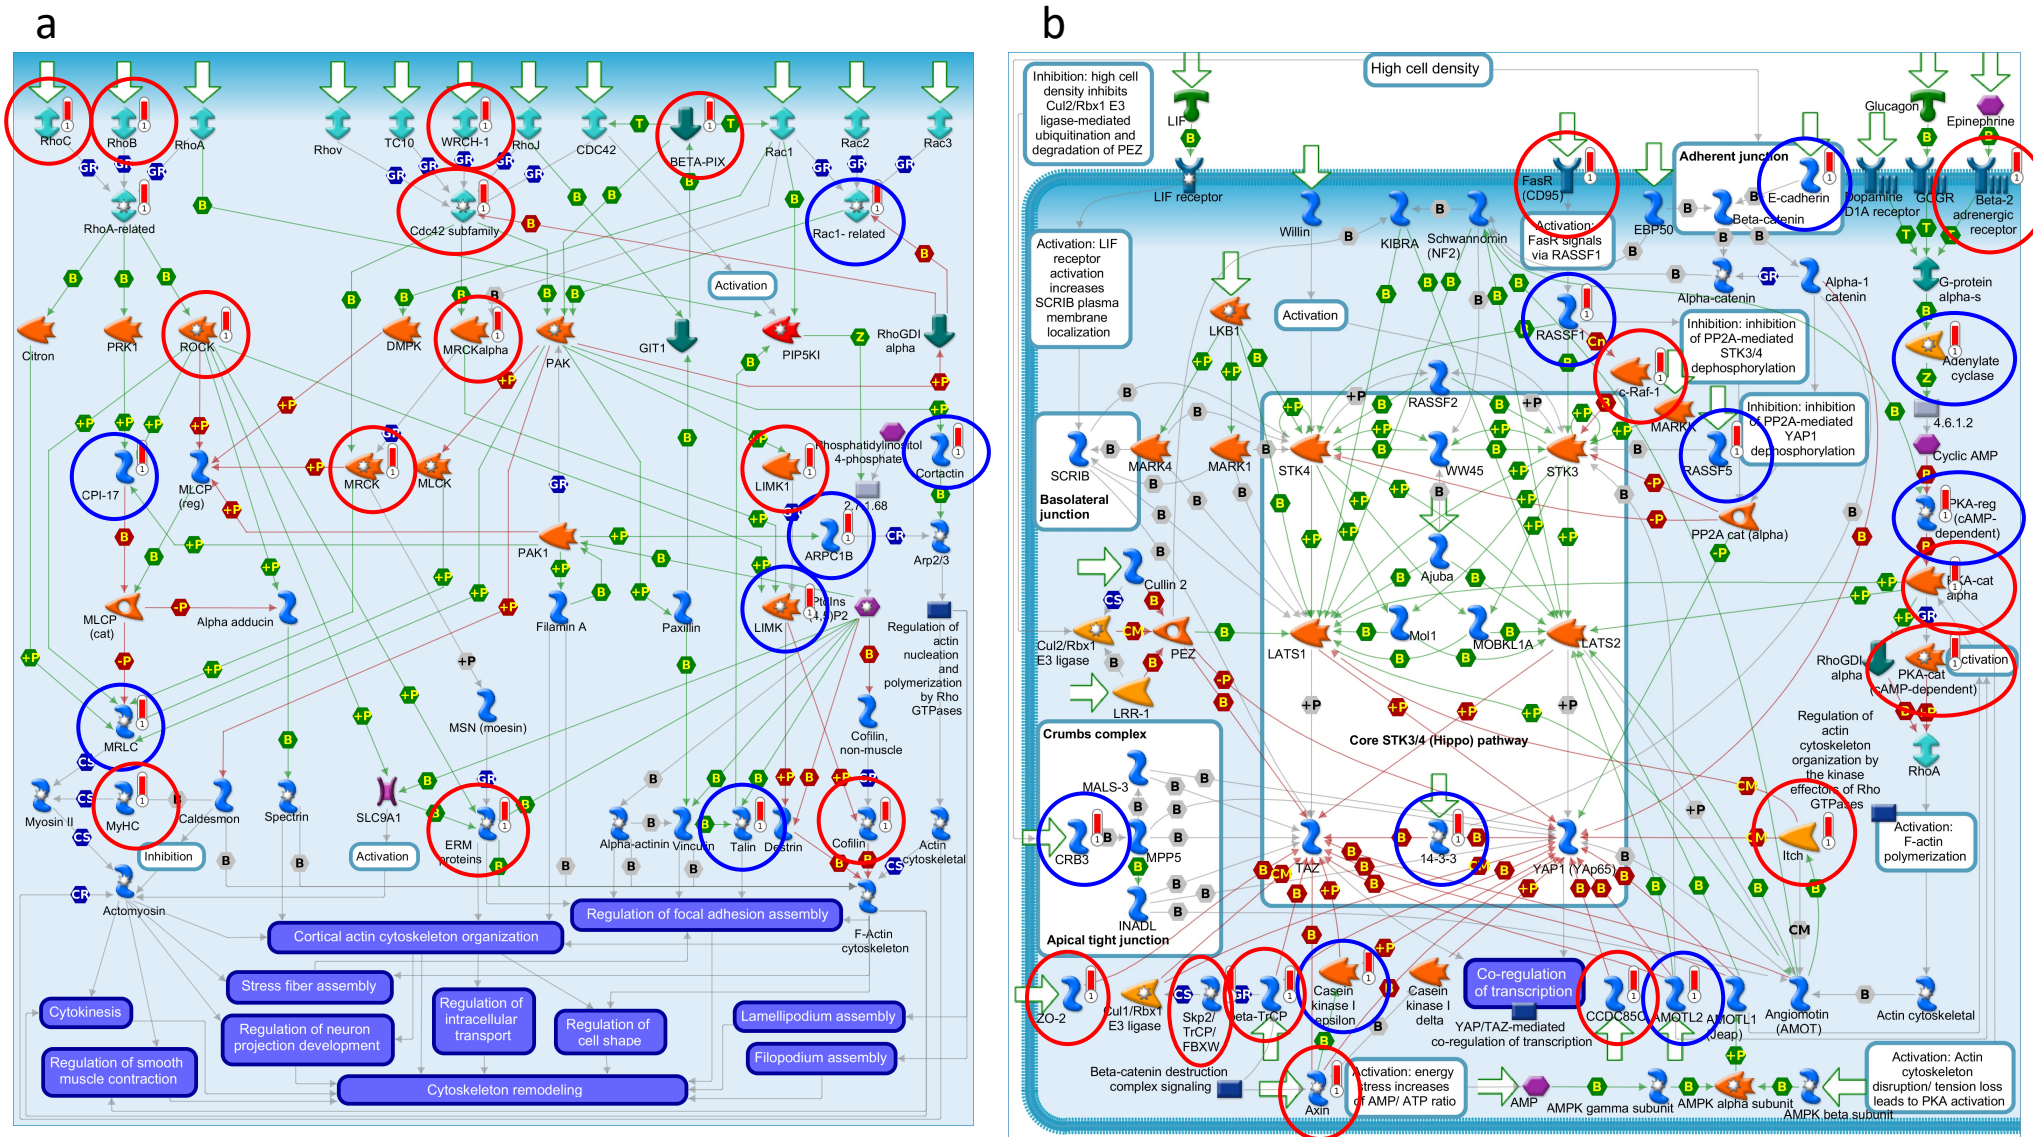

**Supplementary Fig. 2** Pathway maps of “Cytoskeleton remodeling\_Regulation of actin cytoskeleton organization by the kinase effectors of Rho GTPases” (false discovery rate [FDR]= $5.49 \times 10^{-6}$ ) (a) and “Development\_Positive regulation of STK3/4 (Hippo) pathway and negative regulation of YAP/TAZ function” (FDR= $8.64 \times 10^{-5}$ ) (b). Network objects whose DNA methylation levels were significantly higher in Cluster I compared to Cluster II ( $P < 0.05$ ,  $\Delta\beta_{I-II} > 0.1$ ) and network objects whose DNA methylation levels were significantly lower in Cluster I compared to Cluster II ( $P < 0.05$ ,  $\Delta\beta_{I-II} < -0.1$ ) are indicated with red and blue circles, respectively.

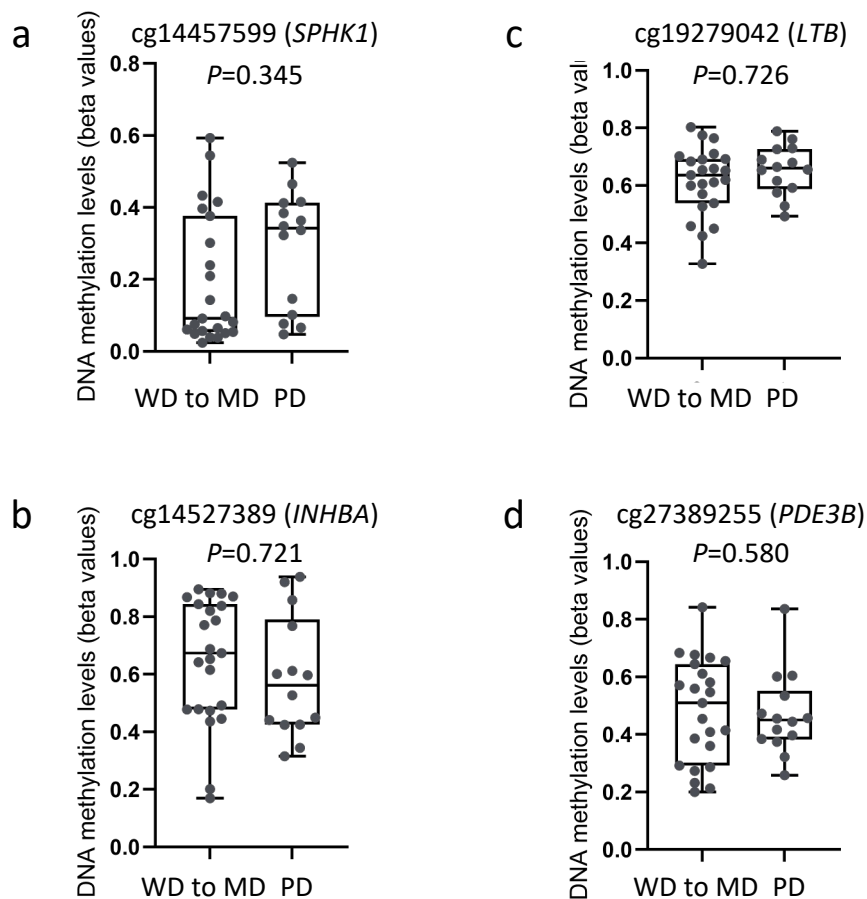

**Supplementary Fig. 3** DNA methylation levels based on the Infinium assay for the *SPHK1* (a), *INHBA* (b), *LTB* (c) and *PDE3B* (d) genes in 37 samples of viral hepatitis-related hepatocellular carcinoma (HCC). Infinium probe ID is shown at the top of each panel. DNA methylation levels of these genes in poorly differentiated HCCs (PD) (n=14) are not significantly different from those in well to moderately differentiated HCCs (WD to MD) (n=23).
